# Supplementary material
Source: PubMed Central journal article supplement (PMC3257394)

Supporting Information

**Experimental and Computational Evidence for Gold Vinylidenes:  
Generation from Terminal Alkynes via a Bifurcation Pathway and Facile C-H Insertions**

Longwu Ye, Yanzhao Wang, Donald Aue\* and Liming Zhang\*

Department of Chemistry and Biochemistry,  
University of California, Santa Barbara, California, 93106

| <b>Content</b>                                                                      | <b>Page number</b> |
|-------------------------------------------------------------------------------------|--------------------|
| <b>General</b>                                                                      | 2                  |
| <b>General procedure A: preparation of benzene-1,2-diynes 1</b>                     | 2                  |
| <b>General procedure B: gold-catalyzed cycloisomerization of benzene-1,2-diynes</b> | 10                 |
| <b>Mechanistic studies</b>                                                          | 18                 |
| <b>Computational studies</b>                                                        | 25                 |
| <b><sup>1</sup>H and <sup>13</sup>C NMR spectra</b>                                 | 83                 |

**General.** 1, 2-Dichloroethane (HPLC grade), ethyl acetate (ACS grade), hexanes (ACS grade) and diethyl ether (ACS grade) were purchased from Fisher Scientific and used without further purification. Anhydrous tetrahydrofuran in Pure-Pac™ from Aldrich was used directly without further purification. Commercially available reagents were used without further purification. Reactions were monitored by thin layer chromatography (TLC) using silicycle pre-coated silica gel plates. Flash column chromatography was performed over silicycle silica gel (230-400 mesh). <sup>1</sup>H NMR and <sup>13</sup>C NMR spectra were recorded on a Varian 500 MHz Unity plus spectrometer and a Varian 400 MHz spectrometer using residue solvent peaks as internal standards. Infrared spectra were recorded with a Perkin Elmer FT-IR spectrum 2000 spectrometer and are reported in reciprocal centimeter (cm<sup>-1</sup>). Mass spectra were recorded with Micromass QTOF2 Quadrupole/Time-of-Flight Tandem mass spectrometer using electron spray ionization.

**General procedure A: preparation of benzene-1,2-diynes **1****

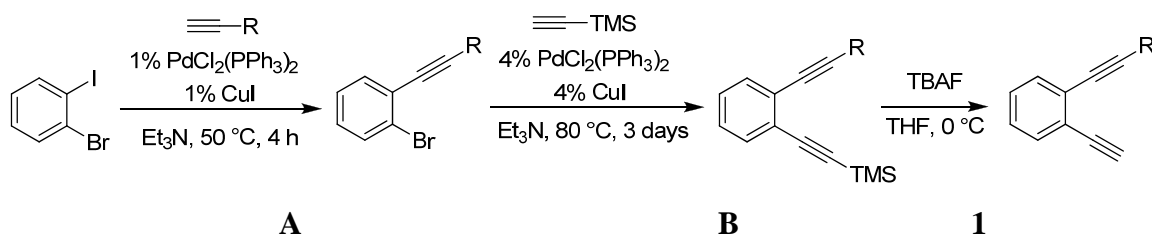

CuI (0.068 g, 0.36 mmol), PdCl<sub>2</sub>(PPh<sub>3</sub>)<sub>2</sub> (0.25 g, 0.36 mmol) and terminal alkyne (46.7 mmol) were added to the solution of 1-bromo-2-iodobenzene (4.5 mL, 35.5 mmol) in Et<sub>3</sub>N (100 mL) at room temperature. Then, the whole was stirred at 50 °C for another 4 h. After the reaction was complete, the resulting mixture was filtered rapidly through a funnel with a thin layer of celite and was eluted with Et<sub>2</sub>O. The filtrate was concentrated and the residue was purified by chromatography on silica gel to afford the product **A**.

CuI (0.054 g, 0.29 mmol), PdCl<sub>2</sub>(PPh<sub>3</sub>)<sub>2</sub> (0.21 g, 0.29 mmol) and ethynyltrimethylsilane (1.5 mL, 10.7 mmol) were added to the solution of **A** (7.1 mmol) in Et<sub>3</sub>N (20 mL) at room temperature. Then, the whole was stirred at 80 °C for another 72 h. After the reaction was complete, the resulting mixture was filtered rapidly through a funnel with a thin layer of celite and was eluted with Et<sub>2</sub>O. The filtrate was concentrated and the residue was purified by chromatography on silica gel to afford the product **B**.

A solution of tetrabutylammonium fluoride (1.0 M, 4.8 mL, 4.8 mmol) was added dropwise to a solution of **B** (4.0 mmol) in THF (35 mL) at 0 °C, and the mixture was stirred at 0 °C for 15 min. After addition

of an aqueous  $\text{NH}_4\text{Cl}$  solution, the mixture was extracted three times with  $\text{Et}_2\text{O}$ . The combined organic layers were washed with brine, dried with anhydrous  $\text{MgSO}_4$ , and the solvents evaporated to dryness. The oily residue was purified by short-column chromatography on silica gel (eluent: hexanes/ $\text{EtOAc}$ ) to yield benzene-1,2-diyne **1**.

### 1-ethynyl-2-(hex-1-yn-1-yl)benzene (**1a**)

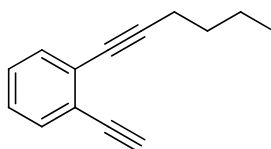

**1a**

Compound **1a** was prepared following the general procedure A. Its spectroscopic data match those reported.  $^1\text{H}$  NMR (400 MHz,  $\text{CDCl}_3$ )  $\delta$  7.49 (dd, 1H,  $J_1 = 7.6$  Hz,  $J_2 = 1.6$  Hz), 7.42 (dd, 1H,  $J_1 = 7.6$  Hz,  $J_2 = 1.6$  Hz), 7.20 – 7.28 (m, 2H), 3.30 (s, 1H), 2.49 (t, 2H,  $J = 6.8$  Hz), 1.50 – 1.67 (m, 4H), 0.97 (t, 3H,  $J = 7.2$  Hz);  $^{13}\text{C}$  NMR (100 MHz,  $\text{CDCl}_3$ )  $\delta$  132.4, 131.8, 128.4, 127.1, 124.3, 94.9, 82.4, 80.4, 79.0, 30.7, 21.8, 19.2, 13.6.

### 1-ethynyl-2-(5-phenylpent-1-yn-1-yl)benzene (**1b**)

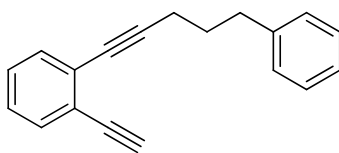

**1b**

Compound **1b** was prepared following the general procedure A.  $^1\text{H}$  NMR (400 MHz,  $\text{CDCl}_3$ )  $\delta$  7.52 (dd, 1H,  $J_1 = 7.6$  Hz,  $J_2 = 0.8$  Hz), 7.46 (d, 1H,  $J = 7.6$  Hz), 7.21 – 7.35 (m, 7H), 3.32 (s, 1H), 2.89 (t, 2H,  $J = 7.6$  Hz), 2.52 (t, 2H,  $J = 7.2$  Hz), 1.98 (p, 2H,  $J = 6.8$  Hz);  $^{13}\text{C}$  NMR (100 MHz,  $\text{CDCl}_3$ )  $\delta$  141.7, 132.5, 131.9, 128.6, 128.4, 128.3, 127.2, 127.0, 125.8, 124.3, 94.4, 82.5, 80.5, 79.6, 34.6, 30.2, 18.9; IR (neat): 3283, 3060, 3026, 2941, 2860, 2229, 2107, 1478, 1441, 759, 700; GCMS  $m/z$  244 ( $\text{M}^+$ ).

### 1-ethynyl-2-(4-phenylbut-1-yn-1-yl)benzene (**1c**)

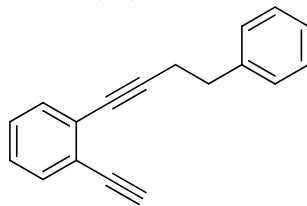

**1c**

Compound **1c** was prepared following the general procedure A.  $^1\text{H}$  NMR (400 MHz,  $\text{CDCl}_3$ )  $\delta$  7.53 (d, 1H,  $J = 7.2$  Hz), 7.44 (dd, 1H,  $J_1 = 7.2$  Hz,  $J_2 = 1.6$  Hz), 7.24 – 7.39 (m, 7H), 3.30 (s, 1H), 3.01 (t, 2H,  $J = 7.4$  Hz), 2.82 (t, 2H,  $J = 7.6$  Hz);  $^{13}\text{C}$  NMR (100 MHz,  $\text{CDCl}_3$ )  $\delta$  140.6, 132.4, 131.9, 128.5, 128.4, 128.3, 127.3, 126.8, 126.2, 124.3, 94.0, 82.3, 80.6, 79.6, 35.0, 21.7; IR (neat): 3283, 3061, 3027, 2928, 2860, 2229, 2108, 1604, 1478, 1441, 759, 699; GCMS  $m/z$  230 ( $\text{M}^+$ ).

### 1-(6-chlorohex-1-yn-1-yl)-2-ethynylbenzene (**1d**)

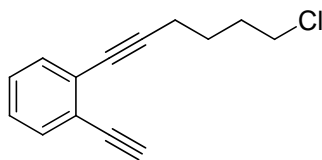

**1d**

Compound **1d** was prepared following the general procedure A.  $^1\text{H}$  NMR (400 MHz,  $\text{CDCl}_3$ )  $\delta$  7.48 (dd, 1H,  $J_1 = 7.2$  Hz,  $J_2 = 1.2$  Hz), 7.41 (dd, 1H,  $J_1 = 7.2$  Hz,  $J_2 = 1.6$  Hz), 7.20 – 7.29 (m, 2H), 3.61 (t, 2H,  $J = 6.6$  Hz), 3.31 (s, 1H), 2.53 (t, 2H,  $J = 6.8$  Hz), 1.99 – 2.07 (m, 2H), 1.74 – 1.81 (m, 2H);  $^{13}\text{C}$  NMR (100 MHz,  $\text{CDCl}_3$ )  $\delta$  132.4, 131.8, 128.4, 127.3, 126.7, 124.3, 93.7, 82.4, 80.6, 79.7, 44.6, 31.4, 25.6, 18.8; IR (neat): 3286, 3060, 2952, 2866, 2229, 2107, 1478, 1441, 759; GCMS  $m/z$  216 ( $\text{M}^+$ ).

### 2-(6-(2-ethynylphenyl)hex-5-yn-1-yl)isoindoline-1,3-dione (**1e**)

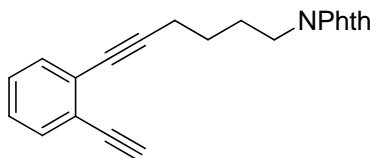

**1e**

Compound **1e** was prepared following the general procedure A.  $^1\text{H}$  NMR (400 MHz,  $\text{CDCl}_3$ )  $\delta$  7.82 – 7.85 (m, 2H), 7.69 – 7.72 (m, 2H), 7.45 (dd, 1H,  $J_1 = 8.0$  Hz,  $J_2 = 1.6$  Hz), 7.38 (dd, 1H,  $J_1 = 8.0$  Hz,  $J_2$

= 1.2 Hz), 7.18 – 7.27 (m, 2H), 3.74 (t, 2H,  $J = 7.2$  Hz), 3.36 (s, 1H), 2.53 (t, 2H,  $J = 6.8$  Hz), 1.88 – 1.96 (m, 2H), 1.64 – 1.72 (m, 2H);  $^{13}\text{C}$  NMR (100 MHz,  $\text{CDCl}_3$ )  $\delta$  168.4, 133.9, 132.3, 132.0, 131.8, 128.3, 127.2, 126.8, 124.4, 123.1, 93.9, 82.3, 80.8, 79.6, 37.5, 27.8, 23.8, 19.1; IR (neat): 3272, 3060, 2941, 2864, 2232, 1770, 1710, 1397, 1372, 1038, 761, 719; MS ( $\text{ES}^+$ ) Calculated for  $[\text{C}_{22}\text{H}_{17}\text{NNaO}_2]^+$ : 350.1; Found: 350.1.

### 1-(6-(benzyloxy)hex-1-yn-1-yl)-2-ethynylbenzene (**1f**)

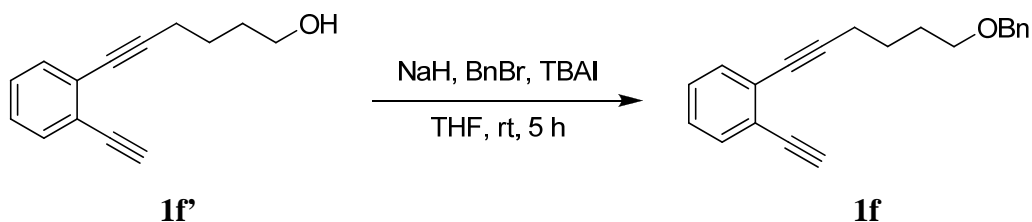

Compound **1f'** was made according to the general procedure **A**. The corresponding benzyl ether **1f** was prepared according to the following procedure: to a solution of **1f'** (0.30 g, 1.5 mmol) in THF (5 mL) was added portionwise NaH (0.072 g, 1.8 mmol) at 0 °C. Upon the end of the  $\text{H}_2$  formation, benzyl bromide (0.19 mL, 1.65 mmol) and TBAI (0.075 mmol) was added to the reaction. The resulting mixture was then stirred at room temperature for 5 h. The reaction mixture was quenched with a saturated solution of  $\text{NH}_4\text{Cl}$ , extracted with  $\text{Et}_2\text{O}$  ( $3 \times 50$  mL) and the combined organic layers were washed with water ( $2 \times 20$  mL), brine (20 mL), dried with  $\text{MgSO}_4$ , and concentrated. The crude product was purified with flash silica gel column chromatography (eluent: hexanes : ethyl acetate = 30:1) to get **1f** (0.39 g) in 90% yield.  $^1\text{H}$  NMR (400 MHz,  $\text{CDCl}_3$ )  $\delta$  7.52 (dd, 1H,  $J_1 = 7.6$  Hz,  $J_2 = 1.6$  Hz), 7.44 (d, 1H,  $J = 7.6$  Hz), 7.39 (d, 4H,  $J = 4.4$  Hz), 7.22 – 7.36 (m, 3H), 4.55 (s, 2H), 3.57 (t, 2H,  $J = 6.4$  Hz), 3.32 (s, 1H), 2.55 (t, 2H,  $J = 6.8$  Hz), 1.87 – 1.94 (m, 2H), 1.75 – 1.82 (m, 2H);  $^{13}\text{C}$  NMR (100 MHz,  $\text{CDCl}_3$ )  $\delta$  138.5, 132.3, 131.7, 128.3, 128.2, 127.5, 127.4, 127.1, 126.9, 124.3, 94.5, 82.4, 80.6, 79.3, 72.7, 69.7, 28.7, 25.5, 19.3; IR (neat): 3282, 3061, 3030, 2939, 2862, 2231, 2107, 1717, 1478, 1361, 1104; MS ( $\text{ES}^+$ ) Calculated for  $[\text{C}_{21}\text{H}_{20}\text{NaO}]^+$ : 311.1; Found: 311.1.

### 2-((6-(2-ethynylphenyl)hex-5-yn-1-yl)oxy)tetrahydro-2H-pyran (**1g**)

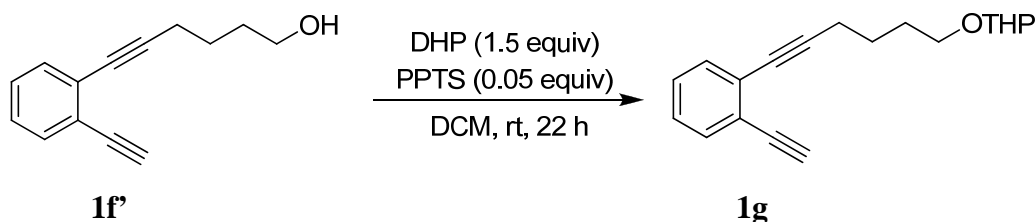

The THP-protected diyne **1g** was prepared from **1f'** according to the following procedure: to a solution of **1f'** (0.60 g, 3.0 mmol) in DCM (30 mL) was added DHP (0.38 g, 4.5 mmol) and PPTS (0.038 g, 0.15 mmol) at room temperature. The resulting mixture was stirred for 22 h. DCM (30 mL) was added to the reaction mixture and it was washed with brine (30 mL), dried with MgSO<sub>4</sub>, and concentrated. The crude product was purified with flash silica gel column chromatography (eluent: hexanes : ethyl acetate = 25:1) to give **1g** (0.72 g) in 85% yield. <sup>1</sup>H NMR (400 MHz, CDCl<sub>3</sub>) δ 7.44 (d, 1H, *J* = 7.2 Hz), 7.37 (d, 1H, *J* = 8.0 Hz), 7.15 – 7.24 (m, 2H), 4.56 (t, 1H, *J* = 3.2 Hz), 3.74 – 3.86 (m, 2H), 3.39 – 3.49 (m, 2H), 3.29 (s, 1H), 2.48 (t, 2H, *J* = 6.8 Hz), 1.65 – 1.83 (m, 6H), 1.46 – 1.58 (m, 4H); <sup>13</sup>C NMR (100 MHz, CDCl<sub>3</sub>) δ 132.2, 131.7, 128.2, 127.0, 126.9, 124.3, 98.6, 94.4, 82.3, 80.5, 79.2, 66.8, 62.1, 30.6, 28.7, 25.3, 19.5, 19.2; IR (neat): 3283, 3060, 2942, 2868, 2231, 2106, 1725, 1478, 1119, 1034; MS (ES<sup>+</sup>) Calculated for [C<sub>19</sub>H<sub>22</sub>NaO<sub>2</sub>]<sup>+</sup>: 305.2; Found: 305.2.

### 1-(cyclohexylethynyl)-2-ethynylbenzene (**1h**)

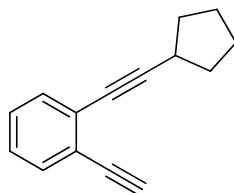

**1h**

Compound **1h** was prepared following the general procedure A. <sup>1</sup>H NMR (400 MHz, CDCl<sub>3</sub>) δ 7.48 (dd, 1H, *J*<sub>1</sub> = 7.6 Hz, *J*<sub>2</sub> = 0.8 Hz), 7.41 (dd, 1H, *J*<sub>1</sub> = 7.6 Hz, *J*<sub>2</sub> = 0.8 Hz), 7.18 – 7.28 (m, 2H), 3.30 (s, 1H), 2.88 – 2.95 (m, 1H), 1.97 – 2.02 (m, 2H), 1.75 – 1.84 (m, 4H), 1.61 – 1.64 (m, 2H); <sup>13</sup>C NMR (100 MHz, CDCl<sub>3</sub>) δ 132.3, 131.6, 128.3, 127.1, 127.0, 124.4, 99.3, 82.4, 80.4, 78.5, 33.8, 30.9, 24.9; IR (neat): 3286, 3060, 2960, 2870, 2224, 2108, 1477, 1450, 758; GCMS *m/z* 194 (M<sup>+</sup>).

### 1-(cyclopentylethynyl)-2-ethynylbenzene (**1i**)

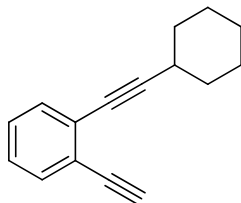

**1i**

Compound **1i** was prepared following the general procedure A. This compound is known and the spectroscopic data match those reported.<sup>2</sup> <sup>1</sup>H NMR (400 MHz, CDCl<sub>3</sub>) δ 7.47 (dd, 1H, *J*<sub>1</sub> = 7.6 Hz, *J*<sub>2</sub> =

1.6 Hz), 7.40 (dd, 1H,  $J_1 = 7.6$  Hz,  $J_2 = 1.6$  Hz), 7.19 – 7.28 (m, 2H), 3.27 (s, 1H), 2.65 – 2.71 (m, 1H), 1.77 – 1.90 (m, 4H), 1.52 – 1.64 (m, 3H), 1.35 – 1.41 (m, 3H);  $^{13}\text{C}$  NMR (100 MHz,  $\text{CDCl}_3$ )  $\delta$  132.3, 131.7, 128.3, 127.1, 127.0, 124.4, 98.9, 82.4, 80.4, 79.1, 32.5, 29.7, 25.9, 24.6; IR (neat): 3288, 3061, 2930, 2853, 2223, 2107, 1478, 1441, 758; GCMS  $m/z$  208 ( $\text{M}^+$ ).

### 1-ethynyl-2-(hex-1-ynyl)-4-methylbenzene (**1j**)

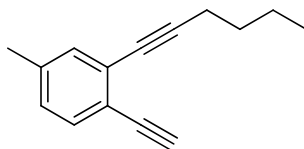

**1j**

Compound **1j** was made according to the general procedure **A** except using with 1-bromo-2-iodo-4-methylbenzene as the starting material.  $^1\text{H}$  NMR (400 MHz,  $\text{CDCl}_3$ )  $\delta$  7.36 (d, 1H,  $J = 8.0$  Hz), 7.23 (s, 1H), 7.02 (d, 1H,  $J = 7.6$  Hz), 3.32 (s, 1H), 2.47 (t, 2H,  $J = 6.8$  Hz), 2.31 (s, 3H), 1.48 – 1.66 (m, 4H), 0.95 (t, 3H,  $J = 7.2$  Hz);  $^{13}\text{C}$  NMR (100 MHz,  $\text{CDCl}_3$ )  $\delta$  138.6, 132.4, 132.3, 128.1, 126.9, 121.4, 94.5, 82.6, 79.6, 79.1, 30.7, 21.9, 19.2, 13.6; IR (neat): 3290, 3027, 2957, 2931, 2871, 2229, 2107, 1603, 1489, 1466, 821; GCMS  $m/z$  196 ( $\text{M}^+$ ).

### 1-ethynyl-4-fluoro-2-(hex-1-yn-1-yl)benzene (**1k**)

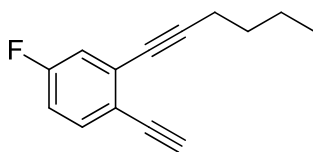

**1k**

Compound **1k** was made according to the general procedure **A** except using with 1-bromo-4-fluoro-2-iodobenzene as the starting material.  $^1\text{H}$  NMR (400 MHz,  $\text{CDCl}_3$ )  $\delta$  6.92 (td, 1H,  $J_1 = 8.8$  Hz,  $J_2 = 5.6$  Hz), 7.09 (dd, 1H,  $J_1 = 9.2$  Hz,  $J_2 = 2.8$  Hz), 6.92 (td, 1H,  $J_1 = 8$  Hz,  $J_2 = 2.8$  Hz), 3.24 (s, 1H), 2.47 (t, 2H,  $J = 7.0$  Hz), 1.57 – 1.65 (m, 2H), 1.47 – 1.54 (m, 2H), 0.95 (t, 3H,  $J = 7.2$  Hz);  $^{13}\text{C}$  NMR (100 MHz,  $\text{CDCl}_3$ )  $\delta$  162.0 (d,  $J = 248.5$  Hz), 134.2 (d,  $J = 8.5$  Hz), 129.2 (d,  $J = 10.2$  Hz), 120.6 (d,  $J = 3.4$  Hz), 118.6 (d,  $J = 23.8$  Hz), 114.9 (d,  $J = 22.1$  Hz), 96.3, 81.5, 80.1, 78.2, 30.5, 21.9, 19.2, 13.5; IR (neat): 3304, 3073, 2958, 2933, 2872, 2232, 2110, 1602, 1568, 1478, 1290, 1264, 1171, 872, 822; GCMS  $m/z$  200 ( $\text{M}^+$ ).

### 1-chloro-3-ethynyl-2-(hex-1-ynyl)benzene (**1l**)

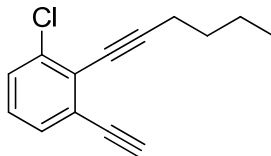

**1l**

Compound **1l** was made according to the general procedure **A** except using with 1-bromo-3-chloro-2-iodobenzene as the starting material.  $^1\text{H}$  NMR (400 MHz,  $\text{CDCl}_3$ )  $\delta$  7.36 – 7.40 (m, 2H), 7.13 (t, 1H,  $J = 8.0$  Hz), 3.31 (s, 1H), 2.55 (t, 2H,  $J = 6.8$  Hz), 1.52 – 1.69 (m, 4H), 0.96 (t, 3H,  $J = 6.8$  Hz);  $^{13}\text{C}$  NMR (100 MHz,  $\text{CDCl}_3$ )  $\delta$  136.1, 130.7, 129.4, 127.5, 126.7, 126.3, 101.0, 81.7, 81.2, 76.2, 30.5, 21.8, 19.5, 13.6; IR (neat): 3298, 3068, 2957, 2932, 2871, 2233, 2113, 1551, 1439, 1142, 852, 786, 733; GCMS  $m/z$  216 ( $\text{M}^+$ ).

### 1-ethynyl-2-(4-methylpent-1-yn-1-yl)benzene (**1m**)

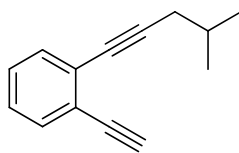

**1m**

Compound **1m** was made according to the general procedure **A**.  $^1\text{H}$  NMR (400 MHz,  $\text{CDCl}_3$ )  $\delta$  7.48 (dd, 1H,  $J_1 = 7.2$  Hz,  $J_2 = 1.6$  Hz), 7.42 (dd, 1H,  $J_1 = 8.0$  Hz,  $J_2 = 1.6$  Hz), 7.19 – 7.29 (m, 2H), 3.28 (s, 1H), 2.38 (d, 2H,  $J = 6.4$  Hz), 1.90 – 2.00 (m, 1H), 1.08 (d, 6H,  $J = 6.8$  Hz);  $^{13}\text{C}$  NMR (100 MHz,  $\text{CDCl}_3$ )  $\delta$  132.4, 131.9, 128.4, 127.2, 127.1, 124.3, 93.9, 82.5, 80.4, 79.9, 28.7, 28.1, 22.0; IR (neat): 3288, 3062, 2958, 2926, 2870, 2235, 2108, 1478, 1441, 758; GCMS  $m/z$  182 ( $\text{M}^+$ ).

### 1-but-1-ynyl-2-ethynyl-benzene (**1n**)

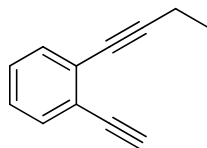

**1n**

Compound **1n** was made according to the general procedure **A**.  $^1\text{H}$  NMR (500 MHz,  $\text{CDCl}_3$ )  $\delta$  7.48 (dd, 1H,  $J_1 = 7.5$  Hz,  $J_2 = 1.5$  Hz), 7.41 (dd, 1H,  $J_1 = 8.0$  Hz,  $J_2 = 1.0$  Hz), 7.20 – 7.28 (m, 2H), 3.30 (s, 1H),



2.49 (q, 2H,  $J = 7.5$  Hz), 1.27 (t, 3H,  $J = 7.5$  Hz);  $^{13}\text{C}$  NMR (125 MHz,  $\text{CDCl}_3$ )  $\delta$  132.4, 131.7, 128.3, 127.1, 126.9, 124.3, 96.2, 82.3, 80.4, 78.3, 13.9, 13.3; IR (neat): 3286, 3061, 2978, 2937, 2917, 2877, 2236, 2211, 1478, 1441, 1320; GCMS  $m/z$  154 ( $\text{M}^+$ ).

### 3-(2-ethynylphenyl)prop-2-yn-1-ol (**1o**)

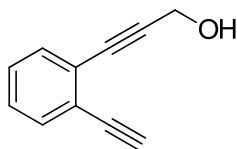

**1o**

Compound **1o** was made according to the general procedure A. This compound is known and the spectroscopic data match those reported.<sup>3</sup>

### 1-(2-ethynylphenyl)hex-1-yn-3-ol (**1p**)

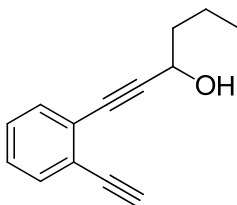

**1p**

Compound **1p** was made according to the general procedure A.  $^1\text{H}$  NMR (500 MHz,  $\text{CDCl}_3$ )  $\delta$  7.45 – 7.47 (m, 1H), 7.40 – 7.42 (m, 1H), 7.20 – 7.26 (m, 2H), 4.65 (dd, 1H,  $J_1 = 6.5$  Hz,  $J_2 = 1.5$  Hz), 3.32 (s, 1H), 2.85 (d, 1H,  $J = 5.5$  Hz), 1.76 – 1.83 (m, 2H), 1.53 – 1.60 (m, 2H), 0.94 (t, 3H,  $J = 7.0$  Hz);  $^{13}\text{C}$  NMR (125 MHz,  $\text{CDCl}_3$ )  $\delta$  132.3, 131.8, 128.3, 127.8, 125.5, 124.4, 94.5, 82.9, 82.1, 81.0, 62.6, 39.7, 18.4, 13.7; IR (neat): 3289(bs), 3062, 2959, 2934, 2872, 2204, 2108, 1478, 1441, 1031, 759; GCMS  $m/z$  198 ( $\text{M}^+$ ).

### N-(3-(2-ethynylphenyl)prop-2-yn-1-yl)-4-methylbenzenesulfonamide (**1q**)

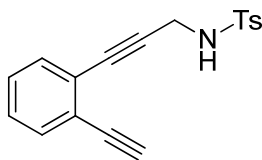

**1q**

Compound **1q** was made according to the general procedure A.  $^1\text{H}$  NMR (400 MHz,  $\text{CDCl}_3$ )  $\delta$  7.81 (d, 2H,  $J = 8.0$  Hz), 7.42 – 7.45 (m, 1H), 7.19 – 7.26 (m, 4H), 7.07 – 7.10 (m, 1H), 4.98 (t, 1H,  $J = 6.0$  Hz), 4.12 (d, 2H,  $J = 6.0$  Hz), 3.26 (s, 1H), 2.29 (s, 3H);  $^{13}\text{C}$  NMR (100 MHz,  $\text{CDCl}_3$ )  $\delta$  143.7, 136.6, 132.4, 131.9, 129.6, 128.3, 128.2, 127.4, 125.0, 124.4, 87.2, 83.0, 81.7, 81.1, 33.4, 21.4; IR (neat): 3281, 3063, 2923, 2850, 1596, 1441, 1327, 1159, 1065, 813; MS ( $\text{ES}^+$ ) Calculated for  $[\text{C}_{18}\text{H}_{15}\text{NNaO}_2\text{S}]^+$ : 332.1; Found: 332.1.

### General procedure B: gold-catalyzed cycloisomerization of benzene-1,2-diynes.

2,6-dibromopyridine *N*-oxide **5** or lutidine *N*-oxide **6** (0.15 mmol) and BrettPhosAuNTf<sub>2</sub> (15.3 mg, 0.015 mmol) were added in this order to a solution of a benzene-1,2-diyne **1** (0.30 mmol) in DCE (3.0 mL) at room temperature. The reaction mixture was stirred at rt and the progress of the reaction was monitored by TLC. The reaction typically took 2 – 6 h. Upon completion, the mixture was concentrated and the residue was purified by chromatography on silica gel (eluent: hexanes/ethyl acetate) to afford the desired product **2**.

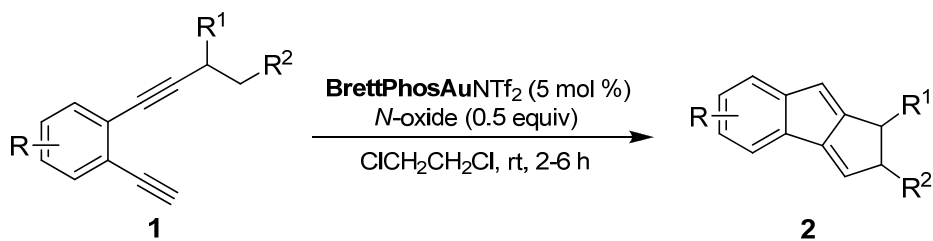

### 2-ethyl-1,2-dihydrocyclopenta[*a*]indene (**2a**)

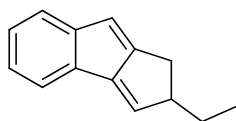

**2a**

Compound **2a** was prepared in 90% isolated yield using lutidine *N*-oxide (**6**) as the additive according to the general procedure B. The reaction time was 6 h.  $^1\text{H}$  NMR (400 MHz,  $\text{CDCl}_3$ )  $\delta$  7.59 (d, 1H,  $J = 7.6$  Hz), 7.22 – 7.26 (m, 2H), 7.06 – 7.10 (m, 1H), 6.75 (dd, 1H,  $J_1 = 2.8$  Hz,  $J_2 = 1.6$  Hz), 6.25 – 6.27 (m, 1H), 3.34 – 3.39 (m, 1H), 2.94 (ddd, 1H,  $J_1 = 18.4$  Hz,  $J_2 = 6.4$  Hz,  $J_3 = 2.0$  Hz), 2.36 (dt, 1H,  $J_1 = 18.4$  Hz,  $J_2 = 2.0$  Hz), 1.62 – 1.71 (m, 1H), 1.53 – 1.60 (m, 1H), 1.03 (t, 3H,  $J = 7.6$  Hz);  $^{13}\text{C}$  NMR (125 MHz,

CDCl<sub>3</sub>)  $\delta$  154.1, 150.9, 149.0, 137.8, 129.7, 127.7, 122.9, 122.0, 120.1, 115.4, 54.6, 30.0, 28.4, 12.3; IR (neat): 3045, 2961, 2929, 2874, 1710, 1604, 1461, 1323, 1034, 966; GCMS  $m/z$  182 (M<sup>+</sup>).

### 3-methyl-2,3-dihydro-1H-fluorene (3a)

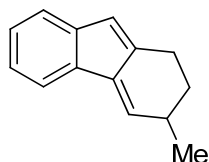

**3a**

This title compound was formed as a minor product in the above reaction. When IPrAuNTf<sub>2</sub> was the catalyst, this minor product was formed in a sufficient yield to allow separation. <sup>1</sup>H NMR (600 MHz, CDCl<sub>3</sub>)  $\delta$  7.48 (d, 1H,  $J$  = 7.8 Hz), 7.15 – 7.16 (m, 2H), 7.04 – 7.07 (m, 1H), 6.68 (t, 1H,  $J$  = 2.4 Hz), 6.38 (s, 1H), 2.81 (dt, 1H,  $J_1$  = 16.2 Hz,  $J_2$  = 4.8 Hz), 2.56 – 2.65 (m, 2H), 2.00 – 2.05 (m, 1H), 1.47 – 1.54 (m, 1H), 1.21 (d, 3H,  $J$  = 4.8 Hz), 6.28 (s, 1H), 3.10 – 3.14 (m, 2H), 2.73 – 2.76 (m, 2H); <sup>13</sup>C NMR (100 MHz, CDCl<sub>3</sub>)  $\delta$  154.1, 143.7, 139.7, 138.9, 135.3, 134.6, 127.4, 123.7, 123.0, 119.8, 119.1, 33.1, 31.5, 23.8, 20.9; IR (neat): 3052, 3011, 2957, 2928, 2871, 2855, 1719, 1700, 1649, 1458, 1016; GCMS  $m/z$  182 (M<sup>+</sup>).

### 2-benzyl-1,2-dihydrocyclopenta[a]indene (2b)

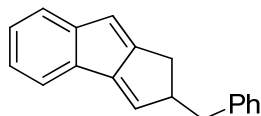

**2b**

Compound **2b** was prepared in 91% yield using 2,6-dibromopyridine *N*-oxide (**5**) as the additive according to the general procedure B. The reaction time was 4 h. <sup>1</sup>H NMR (500 MHz, CDCl<sub>3</sub>)  $\delta$  7.59 (d, 1H,  $J$  = 7.5 Hz), 7.35 – 7.39 (m, 2H), 7.25 – 7.30 (m, 5H), 7.10 – 7.14 (m, 1H), 6.69 (t, 1H,  $J$  = 2.0 Hz), 6.29 (s, 1H), 3.74 – 3.79 (m, 1H), 2.86 – 2.97 (m, 3H), 2.48 (dt, 1H,  $J_1$  = 18.0 Hz,  $J_2$  = 2.0 Hz); <sup>13</sup>C NMR (125 MHz, CDCl<sub>3</sub>)  $\delta$  153.5, 150.8, 149.2, 140.3, 136.9, 129.7, 128.8, 128.4, 127.9, 126.1, 123.0, 122.1, 120.1, 115.9, 54.5, 41.9, 30.2; IR (neat): 3060, 3026, 2921, 2850, 1709, 1603, 1495, 1453, 1324, 1030, 966, 910; GCMS  $m/z$  244 (M<sup>+</sup>).

### 2-phenyl-1,2-dihydrocyclopenta[a]indene (2c)

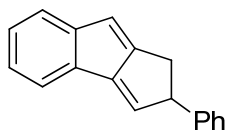

**2c**

Compound **2c** was prepared in 95% yield using 2,6-dibromopyridine *N*-oxide (**5**) as the additive according to the general procedure B. The reaction time was 4 h.  $^1\text{H}$  NMR (400 MHz,  $\text{CDCl}_3$ )  $\delta$  7.64 (d, 1H,  $J = 7.6$  Hz), 7.22 – 7.35 (m, 7H), 7.11 – 7.17 (m, 1H), 6.76 (dd, 1H,  $J_1 = 3.5$  Hz,  $J_2 = 2.0$  Hz), 6.36 (t, 1H,  $J = 0.8$  Hz), 4.61 – 4.64 (m, 1H), 3.33 (ddd, 1H,  $J_1 = 18.4$  Hz,  $J_2 = 6.8$  Hz,  $J_3 = 2.0$  Hz), 2.68 (dt, 1H,  $J_1 = 18.4$  Hz,  $J_2 = 2.0$  Hz);  $^{13}\text{C}$  NMR (100 MHz,  $\text{CDCl}_3$ )  $\delta$  153.9, 151.0, 150.1, 143.8, 136.1, 129.8, 128.7, 128.2, 127.4, 126.7, 123.3, 122.3, 120.3, 116.4, 57.9, 34.0; IR (neat): 3064, 3026, 2914, 2841, 1601, 1494, 1444, 1427, 1197, 942, 820; GCMS  $m/z$  230 ( $\text{M}^+$ ).

### 2-(2-chloroethyl)-1,2-dihydrocyclopenta[a]indene (2d)

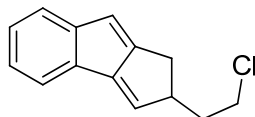

**2d**

Compound **2d** was prepared in 82% yield using 2,6-dibromopyridine *N*-oxide (**5**) as the additive according to the general procedure B. The reaction time was 4 h.  $^1\text{H}$  NMR (400 MHz,  $\text{CDCl}_3$ )  $\delta$  7.58 (d, 1H,  $J = 7.6$  Hz), 7.22 – 7.24 (m, 2H), 7.08 – 7.12 (m, 1H), 6.69 (t, 1H,  $J = 2.0$  Hz), 6.28 (d, 1H,  $J = 1.2$  Hz), 3.62 – 3.73 (m, 3H), 3.01 (ddd, 1H,  $J_1 = 18.4$  Hz,  $J_2 = 6.4$  Hz,  $J_3 = 2.0$  Hz), 2.38 (dt, 1H,  $J_1 = 18.4$  Hz,  $J_2 = 2.0$  Hz), 2.08 – 2.16 (m, 1H), 1.95 – 2.04 (m, 1H);  $^{13}\text{C}$  NMR (125 MHz,  $\text{CDCl}_3$ )  $\delta$  152.9, 150.8, 149.6, 135.6, 129.5, 128.0, 123.3, 122.1, 120.2, 116.2, 50.1, 43.3, 38.2, 29.9; IR (neat): 3066, 2998, 2926, 2865, 1707, 1602, 1444, 1285; GCMS  $m/z$  216 ( $\text{M}^+$ ).

### 2-(2-(1,2-dihydrocyclopenta[a]inden-2-yl)ethyl)isoindoline-1,3-dione (2e)

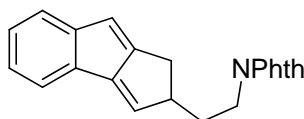

**2e**

Compound **2e** was prepared in 93% yield using lutidine *N*-oxide (**6**) as the additive according to the general procedure B. The reaction time was 6 h.  $^1\text{H}$  NMR (400 MHz,  $\text{CDCl}_3$ )  $\delta$  7.81 – 7.84 (m, 2H), 7.71 – 7.73 (m, 2H), 7.56 (d, 1H,  $J = 8.0$  Hz), 7.21 – 7.22 (m, 2H), 7.05 – 7.09 (m, 1H), 6.74 (dd, 1H,  $J_1 = 2.8$  Hz,  $J_2 = 1.6$  Hz), 6.26 (t, 1H,  $J = 0.8$  Hz), 3.81 – 3.86 (m, 2H), 3.41 – 3.46 (m, 1H), 3.02 (ddd, 1H,  $J_1 = 18.4$  Hz,  $J_2 = 6.4$  Hz,  $J_3 = 2.0$  Hz), 2.47 (dt, 1H,  $J_1 = 18.4$  Hz,  $J_2 = 2.0$  Hz), 1.85 – 1.94 (m, 1H), 1.99 – 2.07 (m, 1H);  $^{13}\text{C}$  NMR (125 MHz,  $\text{CDCl}_3$ )  $\delta$  168.3, 153.2, 150.8, 149.6, 136.0, 133.9, 132.0, 129.6, 128.0, 123.2, 123.1, 122.1, 120.2, 116.1, 50.2, 36.6, 34.1, 30.2; IR (neat): 3063, 2926, 2853, 1769, 1710, 1605, 1399, 1372; MS ( $\text{ES}^+$ ) Calculated for  $[\text{C}_{22}\text{H}_{17}\text{NNaO}_2]^+$ : 350.1; Found: 350.1.

### 2-(2-(benzyloxy)ethyl)-1,2-dihydrocyclopenta[*a*]indene (**2f**)

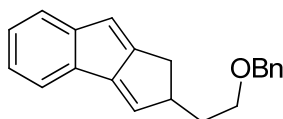

**2f**

Compound **2f** was prepared in 89% yield using lutidine *N*-oxide (**6**) as the additive according to the general procedure B. The reaction time was 6 h.  $^1\text{H}$  NMR (500 MHz,  $\text{CDCl}_3$ )  $\delta$  7.58 (d, 1H,  $J = 8.0$  Hz), 7.35 – 7.39 (m, 4H), 7.29 – 7.34 (m, 1H), 7.21 – 7.24 (m, 2H), 7.06 – 7.11 (m, 1H), 6.73 (dd, 1H,  $J_1 = 2.5$  Hz,  $J_2 = 1.5$  Hz), 6.26 (t, 1H,  $J = 1.0$  Hz), 4.55 (s, 2H), 3.59 – 3.67 (m, 3H), 2.96 (ddd, 1H,  $J_1 = 18.0$  Hz,  $J_2 = 6.5$  Hz,  $J_3 = 2.0$  Hz), 2.40 (dt, 1H,  $J_1 = 18.0$  Hz,  $J_2 = 2.0$  Hz), 1.95 – 2.02 (m, 1H), 1.81 – 1.88 (m, 1H);  $^{13}\text{C}$  NMR (125 MHz,  $\text{CDCl}_3$ )  $\delta$  153.7, 150.8, 149.0, 138.3, 137.5, 129.7, 128.3, 127.8, 127.6, 127.5, 123.0, 122.0, 120.1, 115.6, 73.1, 68.9, 50.0, 35.5, 30.4; IR (neat): 3064, 2925, 2857, 1601, 1445, 1363, 1204, 1028, 821; MS ( $\text{ES}^+$ ) Calculated for  $[\text{C}_{21}\text{H}_{20}\text{NaO}]^+$ : 311.1; Found: 311.1.

### 2-(2-(1,2-dihydrocyclopenta[*a*]inden-2-yl)ethoxy)tetrahydro-2H-pyran (**2g**)

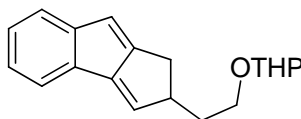

**2g**

Compound **2g** was prepared in 92% yield using lutidine *N*-oxide (**6**) as the additive according to the general procedure B. The reaction time was 6 h.  $^1\text{H}$  NMR (400 MHz,  $\text{CDCl}_3$ )  $\delta$  7.58 (d, 1H,  $J = 7.6$  Hz), 7.23 (d, 2H,  $J = 4.0$  Hz), 7.07 – 7.12 (m, 1H), 6.76 (d, 1H,  $J = 2.0$  Hz), 6.27 (s, 1H), 4.62 (dd, 1H,  $J_1 =$

6.8 Hz,  $J_2 = 3.2$  Hz), 3.85 – 3.95 (m, 2H), 3.51 – 3.60 (m, 3H), 2.99 (dd, 1H,  $J_1 = 18.0$  Hz,  $J_2 = 6.4$  Hz), 2.43 (d, 1H,  $J = 18.4$  Hz), 1.93 – 2.03 (m, 1H), 1.72 – 1.88 (m, 3H), 1.52 – 1.65 (m, 4H);  $^{13}\text{C}$  NMR (100 MHz,  $\text{CDCl}_3$ )  $\delta$  153.8, 150.9, 149.0, 137.6, 129.7, 127.8, 123.0, 122.0, 120.1, 1155.6, 98.9, 66.0, 62.2, 50.1, 35.4, 30.7, 30.3, 25.4, 19.5; IR (neat): 3065, 3044, 2938, 2869, 1602, 1323, 1352, 1136, 1075, 1034; MS ( $\text{ES}^+$ ) Calculated for  $[\text{C}_{19}\text{H}_{22}\text{NaO}_2]^+$ : 305.2; Found: 305.2.

**(3aR,9aR)-2,3,3a,9a-tetrahydro-1H-pentaleno[2,1-a]indene (2h)**

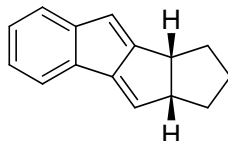

**2h**

Compound **2h** was prepared in 86% yield using 2,6-dibromopyridine *N*-oxide (**5**) as the additive according to the general procedure B. The reaction time was 2 h.  $^1\text{H}$  NMR (400 MHz,  $\text{CDCl}_3$ )  $\delta$  7.57 (d, 1H,  $J = 7.2$  Hz), 7.21 – 7.26 (m, 2H), 7.07 – 7.11 (m, 1H), 6.59 (dd, 1H,  $J_1 = 2.4$  Hz,  $J_2 = 1.6$  Hz), 6.25 (t, 1H,  $J = 1.6$  Hz), 3.84 – 3.89 (m, 1H), 3.40 – 3.44 (m, 1H), 1.67 – 1.87 (m, 4H), 1.53 – 1.60 (m, 1H), 1.35 – 1.45 (m, 1H);  $^{13}\text{C}$  NMR (100 MHz,  $\text{CDCl}_3$ )  $\delta$  159.8, 151.0, 149.7, 137.4, 129.8, 127.7, 123.1, 122.0, 120.3, 115.4, 58.1, 41.1, 33.3, 30.4, 24.9; IR (neat): 3065, 3010, 2947, 2861, 1602, 1443, 1294, 1192, 1011, 829; GCMS  $m/z$  194 ( $\text{M}^+$ ).

**(4aR,10aS)-1,2,3,4,4a,10a-hexahydroindeno[2,1-a]indene (2i)**

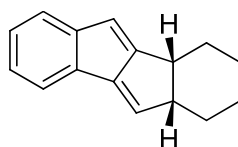

**2i**

Compound **2i** was prepared in 83% yield using 2,6-dibromopyridine *N*-oxide (**5**) as the additive according to the general procedure B. The reaction time was 2 h.  $^1\text{H}$  NMR (400 MHz,  $\text{CDCl}_3$ )  $\delta$  7.58 (d, 1H,  $J = 7.6$  Hz), 7.19 – 7.25 (m, 2H), 7.05 – 7.12 (m, 1H), 6.68 (t, 1H,  $J = 2.4$  Hz), 6.25 (s, 1H), 3.36 – 3.44 (m, 1H), 3.04 – 3.10 (m, 1H), 1.87 – 1.95 (m, 2H), 1.38 – 1.65 (m, 6H);  $^{13}\text{C}$  NMR (100 MHz,  $\text{CDCl}_3$ )  $\delta$  159.1, 150.6, 148.4, 138.5, 129.9, 127.7, 123.0, 122.0, 120.2, 115.2, 51.8, 36.6, 26.9, 26.6, 20.8, 20.5; IR (neat): 3060, 2928, 2855, 1708, 1602, 1447, 1295, 1084, 909; GCMS  $m/z$  208 ( $\text{M}^+$ ).

## 2-ethyl-6-methyl-1,2-dihydrocyclopenta[a]indene (**2j**)

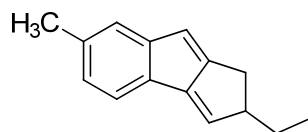

**2j**

Compound **2j** was prepared in 93% yield using lutidine *N*-oxide (**6**) as the additive according to the general procedure B. The reaction time was 6 h.  $^1\text{H}$  NMR (400 MHz,  $\text{CDCl}_3$ )  $\delta$  7.48 (d, 1H,  $J = 7.6$  Hz), 7.07 (s, 1H), 6.91 (d, 1H,  $J = 7.6$  Hz), 6.67 (d, 1H,  $J = 2.0$  Hz), 6.22 (s, 1H), 3.33 – 3.39 (m, 1H), 2.93 (ddd, 1H,  $J_1 = 18.4$  Hz,  $J_2 = 6.4$  Hz,  $J_3 = 2.0$  Hz), 2.40 (s, 3H), 2.32 – 2.38 (m, 1H), 1.62 – 1.71 (m, 1H), 1.53 – 1.60 (m, 1H), 1.04 (t, 3H,  $J = 7.6$  Hz);  $^{13}\text{C}$  NMR (100 MHz,  $\text{CDCl}_3$ )  $\delta$  154.5, 151.3, 148.8, 137.7, 136.8, 127.2, 123.7, 121.7, 121.0, 115.3, 54.5, 29.9, 28.4, 21.8, 12.3; IR (neat): 3060, 2959, 2923, 2871, 1706, 1606, 1454, 1292, 809; GCMS  $m/z$  196 ( $\text{M}^+$ ).

## 2-ethyl-6-fluoro-1,2-dihydrocyclopenta[a]indene (**2k**)

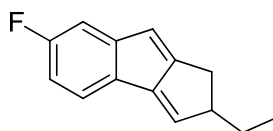

**2k**

Compound **2k** was prepared in 97% yield using lutidine *N*-oxide (**6**) as the additive according to the general procedure B. The reaction time was 6 h.  $^1\text{H}$  NMR (400 MHz,  $\text{CDCl}_3$ )  $\delta$  7.49 (dd, 1H,  $J_1 = 8.0$  Hz,  $J_2 = 1.6$  Hz), 6.92 (dd, 1H,  $J_1 = 9.6$  Hz,  $J_2 = 2.4$  Hz), 6.74 – 6.79 (m, 1H), 6.70 (t, 1H,  $J = 2.4$  Hz), 6.22 (d, 1H,  $J = 1.6$  Hz), 3.33 – 3.39 (m, 1H), 2.94 (ddd, 1H,  $J_1 = 18.4$  Hz,  $J_2 = 6.4$  Hz,  $J_3 = 2.0$  Hz), 2.36 (dt, 1H,  $J_1 = 18.4$  Hz,  $J_2 = 2.0$  Hz), 1.62 – 1.73 (m, 1H), 1.51 – 1.60 (m, 1H), 1.03 (t, 3H,  $J = 7.6$  Hz);  $^{13}\text{C}$  NMR (125 MHz,  $\text{CDCl}_3$ )  $\delta$  163.1 (d,  $J = 243.4$  Hz), 156.5, 153.0 (d,  $J = 9.4$  Hz), 147.7, 138.1, 125.6, 122.7 (d,  $J = 9.3$  Hz), 114.9 (d,  $J = 2.5$  Hz), 109.3 (d,  $J = 23.0$  Hz), 107.4 (d,  $J = 23.0$  Hz), 54.6, 30.1, 28.3, 12.3; IR (neat): 3069, 2960, 2927, 2872, 1605, 1593, 1458, 1428, 1222, 1130, 861; GCMS  $m/z$  200 ( $\text{M}^+$ ).

### 7-chloro-2-ethyl-1,2-dihydrocyclopenta[a]indene (**2l**)

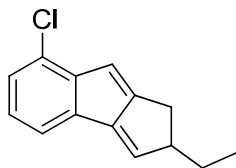

**2l**

Compound **2l** was prepared in 78% yield using lutidine *N*-oxide (**6**) as the additive according to the general procedure B. The reaction time was 6 h. <sup>1</sup>H NMR (400 MHz, CDCl<sub>3</sub>) δ 7.46 (d, 1H, *J* = 7.2 Hz), 7.20 (d, 1H, *J* = 7.6 Hz), 7.01 (t, 1H, *J* = 7.6 Hz), 6.82 (s, 1H), 6.43 (s, 1H), 3.36 – 3.41 (m, 1H), 2.96 (ddd, 1H, *J*<sub>1</sub> = 18.4 Hz, *J*<sub>2</sub> = 6.4 Hz, *J*<sub>3</sub> = 2.0 Hz), 2.38 (d, 1H, *J* = 18.8 Hz), 1.51 – 1.71 (m, 2H), 1.03 (t, 3H, *J* = 7.6 Hz); <sup>13</sup>C NMR (100 MHz, CDCl<sub>3</sub>) δ 155.1, 148.9, 148.3, 140.4, 131.3, 127.8, 125.0, 124.0, 120.3, 113.3, 54.8, 30.0, 28.2, 12.2; IR (neat): 3057, 2960, 2925, 2872, 1598, 1559, 1458, 1408, 1180, 1132, 829; GCMS *m/z* 216 (M<sup>+</sup>).

### 2,2-dimethyl-1,2-dihydrocyclopenta[a]indene (**2m**)

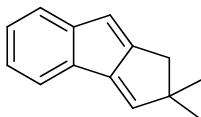

**2m**

Compound **2m** was prepared in 96% yield using lutidine *N*-oxide (**6**) as the additive according to the general procedure B. The reaction time was 6 h. <sup>1</sup>H NMR (400 MHz, CDCl<sub>3</sub>) δ 7.56 (d, 1H, *J* = 7.2 Hz), 7.22 (d, 2H, *J* = 4.0 Hz), 7.06 – 7.10 (m, 1H), 6.54 (d, 1H, *J* = 2.0 Hz), 6.25 (d, 1H, *J* = 2.0 Hz), 2.61 (d, 2H, *J* = 1.6 Hz), 1.32 (s, 6H); <sup>13</sup>C NMR (100 MHz, CDCl<sub>3</sub>) δ 154.0, 150.6, 146.3, 130.0, 127.8, 123.1, 122.1, 120.1, 116.1, 53.6, 39.6, 28.6; IR (neat): 3066, 3013, 2955, 2924, 2863, 1602, 1461, 1445, 1432, 816; GCMS *m/z* 182 (M<sup>+</sup>).

### 1,2-dihydrocyclopenta[a]indene (**2n**)

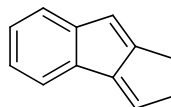

**2n**



Compound **2n** was prepared in 62% yield using 2,6-dibromopyridine *N*-oxide (**5**) as the additive according to the general procedure B. The reaction time was 4 h.  $^1\text{H}$  NMR (400 MHz,  $\text{CDCl}_3$ )  $\delta$  7.59 (d, 1H,  $J = 6.8$  Hz), 7.20 – 7.25 (m, 2H), 7.06 – 7.10 (m, 1H), 6.79 (dd, 1H,  $J_1 = 4.8$  Hz,  $J_2 = 2.8$  Hz), 6.28 (s, 1H), 3.10 – 3.14 (m, 2H), 2.73 – 2.76 (m, 2H);  $^{13}\text{C}$  NMR (100 MHz,  $\text{CDCl}_3$ )  $\delta$  154.9, 151.0, 150.0, 134.1, 129.8, 127.7, 122.9, 121.9, 120.1, 115.2, 39.3, 23.1; IR (neat): 3066, 3004, 2925, 2856, 1643, 1458, 1445, 1282; GCMS  $m/z$  154 ( $\text{M}^+$ ).

### 2-ethyl-1H-indene (7)

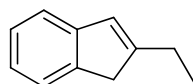

**7**

This compound was isolated as the minor component in the above reaction and its spectroscopic data match those reported.<sup>5</sup>

### 8H-indeno[1,2-c]furan (9)

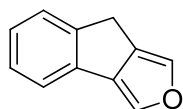

**9**

Compound **9** was prepared in 93% yield using lutidine *N*-oxide (**6**) as the additive according to the general procedure B. The reaction time was 15 min.  $^1\text{H}$  NMR (400 MHz,  $\text{CDCl}_3$ )  $\delta$  7.60 (d, 1H,  $J = 0.8$  Hz), 7.56 (d, 1H,  $J = 7.2$  Hz), 7.43 (d, 1H,  $J = 7.2$  Hz), 7.22 – 7.32 (m, 3H), 3.76 (s, 2H);  $^{13}\text{C}$  NMR (100 MHz,  $\text{CDCl}_3$ )  $\delta$  147.6, 134.5, 134.1, 133.5, 131.3, 129.3, 126.9, 126.5, 125.8, 122.0, 29.0; IR (neat): 3119, 3057, 3026, 2913, 2822, 1634, 1462, 1265, 1198, 1094, 1011, 903; GCMS  $m/z$  156 ( $\text{M}^+$ ).

### 1-propyl-8H-indeno[1,2-c]furan (10)

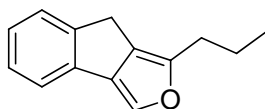

**10**

Compound **10** was prepared in 85% yield using lutidine *N*-oxide (**6**) as the additive according to the general procedure B. The reaction time was 12 h.  $^1\text{H}$  NMR (400 MHz,  $\text{CDCl}_3$ )  $\delta$  7.52 (d, 1H,  $J = 6.0$

Hz), 7.47 (s, 1H), 7.40 (d, 1H,  $J = 6.4$  Hz), 7.26 – 7.30 (m, 1H), 7.20 – 7.23 (m, 1H), 3.69 (s, 2H), 2.66 – 2.70 (m, 2H), 1.72 – 1.79 (m, 2H), 1.00 (t, 3H,  $J = 7.5$  Hz);  $^{13}\text{C}$  NMR (100 MHz,  $\text{CDCl}_3$ )  $\delta$  147.7, 147.1, 135.0, 133.8, 129.2, 126.8, 126.2, 125.7, 123.8, 121.8, 29.5, 29.0, 20.9, 13.9; IR (neat): 3060, 2961, 2931, 2872, 1764, 1631, 1565, 1462, 1174, 949; GCMS  $m/z$  198 ( $\text{M}^+$ ).

### 2-tosyl-2,8-dihydroindeno[1,2-c]pyrrole (**11**)

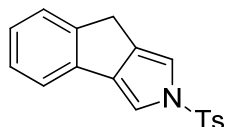

**11**

Compound **11** was prepared in 97% yield using lutidine *N*-oxide (**6**) as the additive according to the general procedure B. The reaction time was 18 h.  $^1\text{H}$  NMR (500 MHz,  $\text{CDCl}_3$ )  $\delta$  7.78 (d, 2H,  $J = 8.5$  Hz), 7.51 (d, 1H,  $J = 7.5$  Hz), 7.39 (d, 1H,  $J = 7.5$  Hz), 7.26 – 7.29 (m, 4H), 7.20 – 7.23 (m, 1H), 7.05 – 7.06 (m, 1H), 3.67 (s, 2H), 2.38 (s, 3H);  $^{13}\text{C}$  NMR (125 MHz,  $\text{CDCl}_3$ )  $\delta$  147.1, 144.6, 136.2, 136.0, 135.5, 133.1, 129.8, 126.9, 126.7, 126.5, 125.5, 121.4, 113.4, 109.7, 30.2, 21.6; IR (neat): 3119, 3060, 2916, 1593, 1366, 1317, 1270, 1092, 1050, 812; MS ( $\text{ES}^+$ ) Calculated for  $[\text{C}_{18}\text{H}_{15}\text{NNaO}_2\text{S}]^+$ : 332.1; Found: 332.1.

### Mechanistic studies:

#### A. Preparation of substrates:

##### A1: Compound **1a-d**<sub>1</sub>

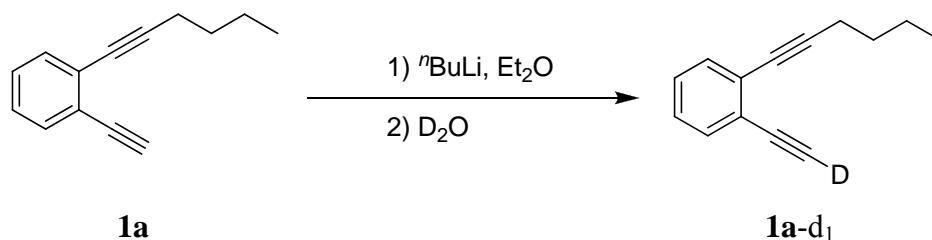

In an oven-dried, 20 mL Schlenk flask, **1a** (128 mg, 0.70 mmol) was dissolved in 1.5 mL of anhydrous diethylether. The flask was cooled to 0 °C before the slow addition of 0.53 mL of  $n\text{BuLi}$  solution (1.6 M in hexanes, 0.84 mmol) and stirring for 15 min at 0 °C, followed by 30 min at room temperature. The flask was recooled to 0 °C, and  $\text{D}_2\text{O}$  (42  $\mu\text{L}$ , 2.1 mmol) was slowly added. The reaction was stirred overnight at room temperature before the solvent was removed in vacuo. The crude product was purified

with flash silica gel column chromatography (eluent: hexanes : ethyl acetate = 200:1) to give **1a'** (0.087 g) in 68% yield. The deuterium incorporation was determined to be >98% D by  $^1\text{H}$  NMR.  $^1\text{H}$  NMR (400 MHz,  $\text{CDCl}_3$ )  $\delta$  7.48 (d, 1H,  $J = 8.0$  Hz), 7.41 (d, 1H,  $J = 8.0$  Hz), 7.19 – 7.28 (m, 2H), 2.48 (t, 2H,  $J = 7.2$  Hz), 1.49 – 1.66 (m, 4H), 0.96 (t, 3H,  $J = 7.2$  Hz);  $^{13}\text{C}$  NMR (125 MHz,  $\text{CDCl}_3$ )  $\delta$  132.4, 131.8, 128.3, 127.1, 124.3, 95.0, 82.0 (t,  $J = 7.4$  Hz), 80.1 (t,  $J = 152.5$  Hz), 79.0, 30.8, 22.0, 19.3, 13.7; IR (neat): 3286, 3061, 3026, 2957, 2932, 2871, 2232, 1982, 1477, 1441, 1328, 1100, 950; GCMS  $m/z$  183 ( $\text{M}^+$ ).

### A2: Compound **1a-Au**

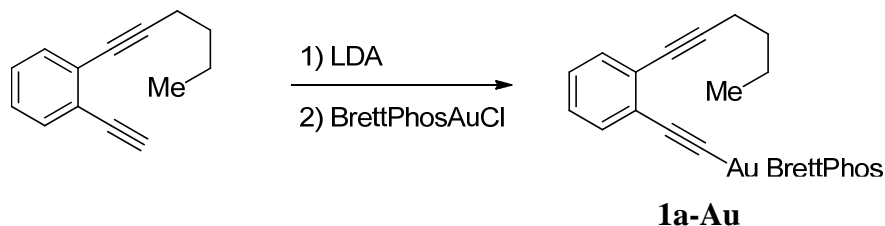

**1a** (71.1 mg, 0.39 mmol) in THF (2 mL) was added dropwise to a solution of lithium diisopropylamine (0.5 mmol) in 2 mL THF at  $-78$  °C for one hour. BrettPhosgold chloride (277 mg, 0.36 mmol) was added and the solution allowed to warm to  $0$  °C. After 5 hours at  $0$  °C, the solution was filtered, concentrated to dryness, and recrystallized from chloroform/pentane to afford **1a-Au** (228 mg, 64% yield) as a beige powder.<sup>4</sup>  $^1\text{H}$  NMR (500 MHz,  $\text{CDCl}_3$ )  $\delta$  7.34 (dd, 1H,  $J_1 = 7.5$  Hz,  $J_2 = 1.5$  Hz), 7.29 (dd, 1H,  $J_1 = 7.5$  Hz,  $J_2 = 1.5$  Hz), 7.05 – 7.10 (m, 3H), 6.96 – 7.02 (m, 2H), 6.91 (dd, 1H,  $J_1 = 9.0$  Hz,  $J_2 = 3.0$  Hz), 3.88 (s, 3H), 3.56 (s, 3H), 2.92 – 2.97 (m, 1H), 2.59 – 2.66 (m, 2H), 2.46 (t, 2H,  $J = 7.5$  Hz), 2.30 – 2.36 (m, 2H), 1.96 – 1.98 (m, 2H), 1.69 – 1.79 (m, 6H), 1.60 – 1.66 (m, 4H), 1.45 – 1.52 (m, 4H), 1.38 (d, 6H,  $J = 6.5$  Hz), 1.15 – 1.35 (m, 14H), 0.87 – 0.94 (m, 10H);  $^{13}\text{C}$  NMR (125 MHz,  $\text{CDCl}_3$ )  $\delta$  155.5, 153.0 (d,  $J = 44.5$  Hz), 148.9, 145.4, 143.0, 141.9, 138.6 (d,  $J = 63.5$  Hz), 132.3, 131.3, 130.4 (d,  $J = 29.0$  Hz), 129.2, 126.3 (d,  $J = 20.5$  Hz), 124.7, 121.8, 119.1, 118.1, 113.0, 109.6, 99.7 (d,  $J = 96.0$  Hz), 92.9, 80.8, 68.0, 55.5, 54.7, 39.0, 38.7, 33.8 (d,  $J = 31.0$  Hz), 33.6, 31.6, 31.0, 30.7, 30.0, 27.5 (d,  $J = 48.0$  Hz), 26.9 (d,  $J = 61.5$  Hz), 25.9, 25.6, 25.1, 24.3, 23.8, 22.7, 22.1, 19.6, 14.1, 13.7;  $^{31}\text{P}$  NMR (161.9 MHz,  $\text{CDCl}_3$ )  $\delta$  45.3; IR (neat): 3433, 3059, 2955, 2930, 2853, 2115, 1640, 1582, 1458, 1354, 1254, 1200, 1058; MS ( $\text{ES}^+$ ) Calculated for  $[\text{AuC}_{49}\text{H}_{67}\text{O}_2\text{P}]^+$ : 915.5; Found: 915.5.

### A3: Compound **1a'-Au**

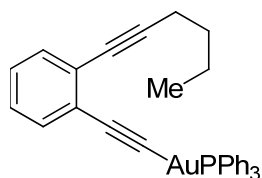

**1a'-Au**

The same procedure was applied to prepare **1a'-Au** (60% yield).  $^1\text{H}$  NMR (500 MHz,  $\text{CDCl}_3$ )  $\delta$  7.57 (ddd, 5H,  $J_1 = 12.6$  Hz,  $J_2 = 5.2$  Hz,  $J_3 = 3.2$  Hz), 7.54 – 7.42 (m, 10H), 7.36 (dt, 1H,  $J_1 = 9.0$  Hz,  $J_2 = 4.2$  Hz), 7.17 – 7.09 (m, 2H), 2.51 (t, 2H,  $J = 7.0$  Hz), 1.70 – 1.60 (m, 2H), 1.59 – 1.50 (m, 2H), 0.91 – 0.83 (t, 3H,  $J = 7.5$  Hz).  $^{13}\text{C}$  NMR (125 MHz,  $\text{CDCl}_3$ )  $\delta$  155.5, 153.0 (d,  $J = 44.5$  Hz), 148.9, 145.4, 143.0, 141.9, 138.6 (d,  $J = 63.5$  Hz), 132.3, 131.3, 130.4 (d,  $J = 29.0$  Hz), 129.2, 126.3 (d,  $J = 20.5$  Hz), 124.7, 121.8, 119.1, 118.1, 113.0, 109.6, 99.7 (d,  $J = 96.0$  Hz), 92.9, 80.8, 68.0, 55.5, 54.7, 39.0, 38.7, 33.8 (d,  $J = 31.0$  Hz), 33.6, 31.6, 31.0, 30.7, 30.0, 27.5 (d,  $J = 48.0$  Hz), 26.9 (d,  $J = 61.5$  Hz), 25.9, 25.6, 25.1, 24.3, 23.8, 22.7, 22.1, 19.6, 14.1, 13.7;  $^{31}\text{P}$  NMR (161.9 MHz,  $\text{CDCl}_3$ )  $\delta$  42.2.

**A4: 1-ethynyl-2-(4-phenyl-4,4- $d_2$ -but-1-yn-1-yl)benzene (1c- $d_2$ )**

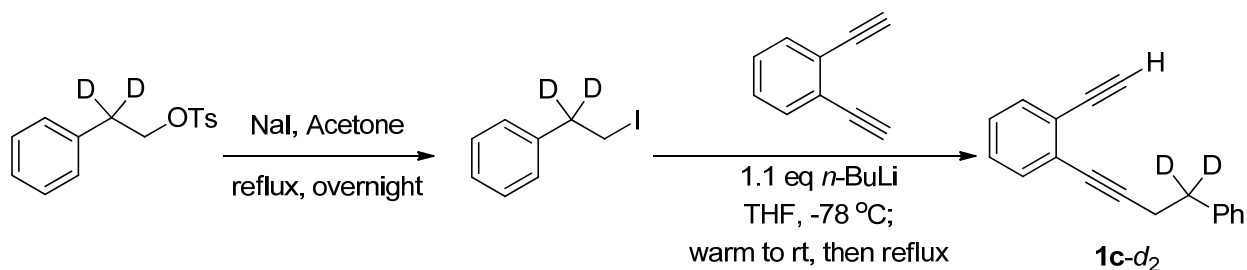

2-phenyl-2,2- $d_2$ -ethyl 4-methylbenzenesulfonate (>98% deuterium) was prepared in 87% yield according to literature procedures<sup>[6]</sup>.

(2-iodo-1,1- $d_2$ -ethyl)benzene (>98% deuterium) was prepared from 2-phenyl-2,2- $d_2$ -ethyl 4-methylbenzenesulfonate in 90 % yield according to literature procedures<sup>[7]</sup>.  $^1\text{H}$  NMR (600 MHz,  $\text{CDCl}_3$ )  $\delta$  7.34 – 7.29 (m, 2H), 7.29 – 7.24 (m, 1H), 7.22 – 7.17 (m, 2H), 3.34 (d,  $J = 9.8$  Hz, 2H);  $^{13}\text{C}$  NMR (200 MHz,  $\text{CDCl}_3$ )  $\delta$  128.6, 128.3, 126.8, 5.33.

1,2-diethynylbenzene was prepared in 89% yield according to literature procedures<sup>[8]</sup>.

Compound **1c- $d_2$**  was prepared in 62% yield by the following procedure: to a THF solution (10 ml) of 1,2-diethynylbenzene (3 mmol) at  $-78$  °C was slowly added n-butyllithium (2.5 M in hexanes, 3.3 mmol)

under N<sub>2</sub>. After stirring for 0.5 h, a THF solution (1ml) of 2-iodo-1,1-*d*<sub>2</sub>-ethylbenzene (3 mmol) was added dropwise and then the reaction was warmed to room temperature, followed by refluxing overnight. Upon completion, the mixture was concentrated and the residue was purified by chromatography on silica gel (eluent: hexanes) to afford the desired product. <sup>1</sup>H NMR (500 MHz, CDCl<sub>3</sub>) δ 7.50 – 7.46 (m, 1H), 7.39 (dd, 1H, *J*<sub>1</sub> = 7.7 Hz, *J*<sub>2</sub> = 1.2 Hz), 7.34 – 7.30 (m, 4H), 7.28 (dd, 1H, *J*<sub>1</sub> = 7.2 Hz, *J*<sub>2</sub> = 1.2 Hz), 7.26 – 7.21 (m, 2H), 3.25 (s, 1H), 2.77 (d, 2H, *J* = 7.0 Hz); <sup>13</sup>C NMR (125 MHz, CDCl<sub>3</sub>) δ 140.6, 132.5, 132.0, 128.6, 128.41, 128.37, 127.3, 126.9, 126.3, 124.3, 94.0, 82.4, 80.5, 79.7, 21.6; GCMS *m/z* 232 (M<sup>+</sup>).

## B. Deuterium-labeling studies

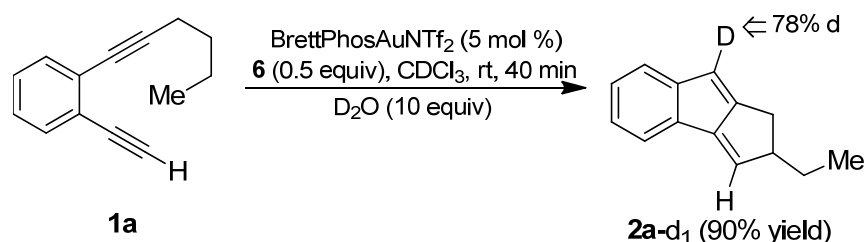

The reaction was run following the general procedure B except that 10 equivalents of D<sub>2</sub>O was added to the reaction mixture. The reaction proceeded surprisingly faster than that in the absence of D<sub>2</sub>O. **2a-d<sub>1</sub>**: <sup>1</sup>H NMR (400 MHz, CDCl<sub>3</sub>) δ 7.58 (d, 1H, *J* = 7.6 Hz), 7.21 – 7.24 (m, 2H), 7.05 – 7.11 (m, 1H), 6.74 (d, 1H, *J* = 2.4 Hz), 3.33 – 3.40 (m, 1H), 2.93 (dd, 1H, *J*<sub>1</sub> = 18.4 Hz, *J*<sub>2</sub> = 6.4 Hz), 2.35 (dd, 1H, *J*<sub>1</sub> = 18.4 Hz, *J*<sub>2</sub> = 2.0 Hz), 1.61- 1.70 (m, 1H), 1.50 – 1.59 (m, 1H), 1.02 (t, 3H, *J* = 7.6 Hz); <sup>13</sup>C NMR (100 MHz, CDCl<sub>3</sub>) δ 154.1 (d, *J* = 13.6 Hz), 150.9, 149.0, 138.0, 129.8, 128.8, 123.0, 122.0, 120.1, 115.4, 54.6, 29.9, 28.4, 12.3; IR (neat): 3066, 3044, 2960, 2928, 2873, 1711, 1603, 1460, 1443, 1325, 1185, 1087, 910; GCMS *m/z* 183 (M<sup>+</sup>).

## 2-phenyl-2,3-*d*<sub>2</sub>-1,2-dihydrocyclopenta[*a*]indene (2c-*d*<sub>2</sub>)

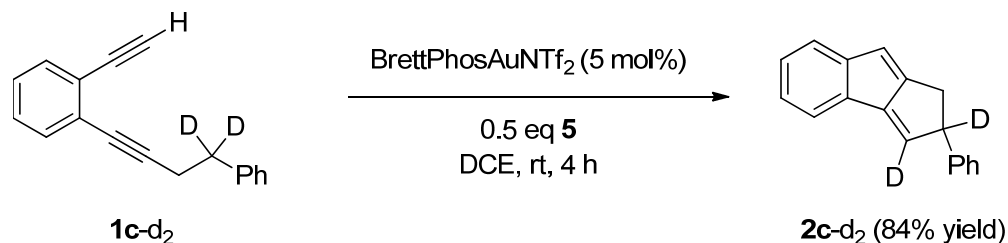

Compound **2c-d<sub>2</sub>** was prepared in 84% yield using 2,6-dibromopyridine *N*-oxide (**5**) as the additive according to the general procedure B. The reaction time was 4 h. <sup>1</sup>H NMR (500 MHz, CDCl<sub>3</sub>) δ 7.62 (t,

$J = 10.9$  Hz, 1H), 7.38 – 7.18 (m, 7H), 7.17 – 7.09 (m, 1H), 6.73 (s, 1H), 6.35 (s, 1H), 4.62 (d, 1H,  $J = 7.8$  Hz), 3.32 (d, 1H,  $J = 18.3$  Hz), 2.67 (dd, 1H,  $J_1 = 18.4$  Hz,  $J_2 = 1.4$  Hz).  $^{13}\text{C}$  NMR (125 MHz,  $\text{CDCl}_3$ )  $\delta$  154.0, 151.0, 150.1, 143.8, 129.8, 128.7, 128.2, 127.3, 126.7, 123.3, 122.3, 120.3, 116.4, 33.9; GCMS  $m/z$  232 ( $\text{M}^+$ ).

### C. Studies using alkynylgold intermediates as substrates

#### C1: the formation of 8-aurated 1,2-dihydrocyclopenta-[a]indene (**2a-Au**)

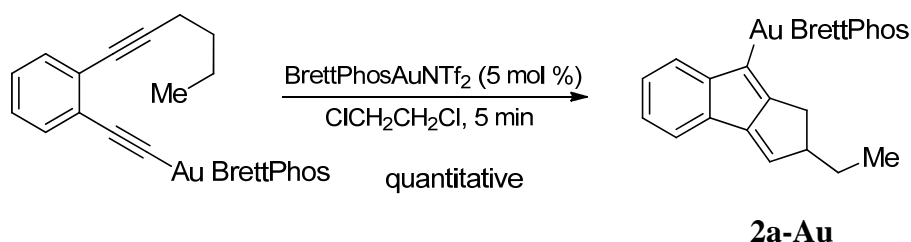

BrettPhosAuNTf<sub>2</sub> (5.1 mg, 0.005 mmol) was added to a solution of the compound **1a-Au** (0.10 mmol) in DCE (1.0 mL) at room temperature. The reaction mixture was stirred at rt and the progress of the reaction was monitored by TLC. Upon completion (5 min), the mixture was concentrated and the residue was purified by chromatography on silica gel (eluent: hexanes/ethyl acetate with 5% Et<sub>3</sub>N) to afford the desired product **2a-Au** quantitatively.  $^1\text{H}$  NMR (400 MHz,  $\text{CDCl}_3$ )  $\delta$  7.38 (d, 1H,  $J = 7.6$  Hz), 7.14 (d, 1H,  $J = 7.2$  Hz), 7.06 (t, 1H,  $J = 7.6$  Hz), 6.90 – 6.98 (m, 2H), 6.82 – 6.85 (m, 3H), 6.33 (d, 1H,  $J = 1.2$  Hz), 3.90 (s, 3H), 3.54 (s, 3H), 3.19 – 3.21 (m, 1H), 2.70 – 2.80 (m, 3H), 2.39 – 2.43 (m, 2H), 2.18 – 2.22 (m, 2H), 2.02 – 2.06 (m, 2H), 1.11 – 1.90 (m, 3H), 1.00 – 1.04 (m, 3H), 0.89 (d, 6H,  $J = 6.4$  Hz), 0.74 (dd, 6H,  $J_1 = 8.8$  Hz,  $J_2 = 7.2$  Hz);  $^{13}\text{C}$  NMR (100 MHz,  $\text{CDCl}_3$ )  $\delta$  163.0, 162.4 (d,  $J = 25.5$  Hz), 161.9, 159.5, 156.0, 153.1 (d,  $J = 55.0$  Hz), 151.1 (d,  $J = 34.0$  Hz), 148.0, 145.3 (d,  $J = 17.0$  Hz), 139.1, 138.9, 132.1 (d,  $J = 17.0$  Hz), 130.8 (d,  $J = 21.5$  Hz), 55.5, 54.7, 53.4, 39.5, 39.3, 33.9 (t,  $J = 49.0$  Hz), 32.8, 32.0, 30.7, 30.0, 29.0, 27.6 (d,  $J = 55.0$  Hz), 27.1, 27.0, 26.2, 25.0, 24.3, 22.9, 22.7, 12.5;  $^{31}\text{P}$  NMR (161.9 MHz,  $\text{CDCl}_3$ )  $\delta$  48.8; IR (neat): 3057, 2955, 2928, 2851, 1577, 1456, 1422, 1253, 1016, 909; MS ( $\text{ES}^+$ ) Calculated for  $[\text{AuC}_{49}\text{H}_{67}\text{O}_2\text{P}]^+$ : 915.5; Found: 915.5.

#### Discussion:

The rapid reaction above is expected as the concentration of BrettPhosAu was high in the system. When  $\text{Ph}_3\text{PauNTf}_2$  (7.5 mol %) was used as the catalyst, the reaction was rather sluggish and did not proceed to completion in 5 h (90% conversion, Eq. 1). The reaction yield for **2a-Au** was lower but still good.

Due to the likely low quantity of **2a'-Au**, we were not able to identify its NMR signals, let alone purifying and characterizing it. Considering that BrettPhosAu<sup>+</sup> is generated during the reaction, the observed sluggishness was somewhat surprising. However, it can be explained if the gold exchange between **2a'-Au** and BrettPhosAu<sup>+</sup> is fast. Alternatively, Ph<sub>3</sub>PAu<sup>+</sup> may somehow slow the reaction catalyzed by in-situ generated BrettPhosAu<sup>+</sup>. In either event, it is clear that Ph<sub>3</sub>PAu<sup>+</sup> is a catalyst much inferior to BrettPhosAu<sup>+</sup> for the cycloisomerization, consistent with the results shown in the condition studies (Table 1 in the manuscript).

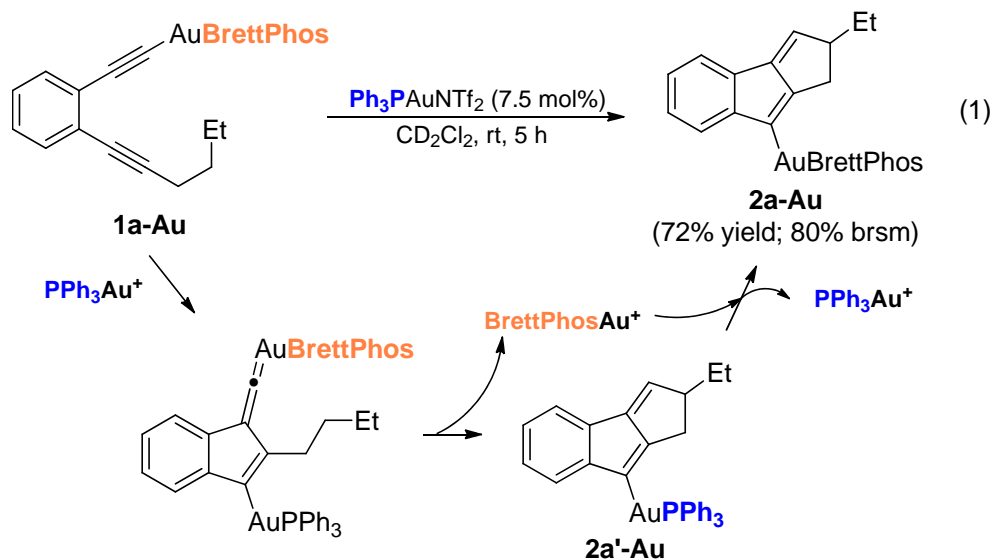

The results using **1a'-Au** with Ph<sub>3</sub>PAu attached at the ethynyl terminus as the substrate further confirmed the above conclusion. Hence, as shown in Eq. 2, when Ph<sub>3</sub>PAuNTf<sub>2</sub> was used as the catalyst, little peak around 6.4 ppm, which might be attributed to **2a'-Au**, was observable; instead, the protonated

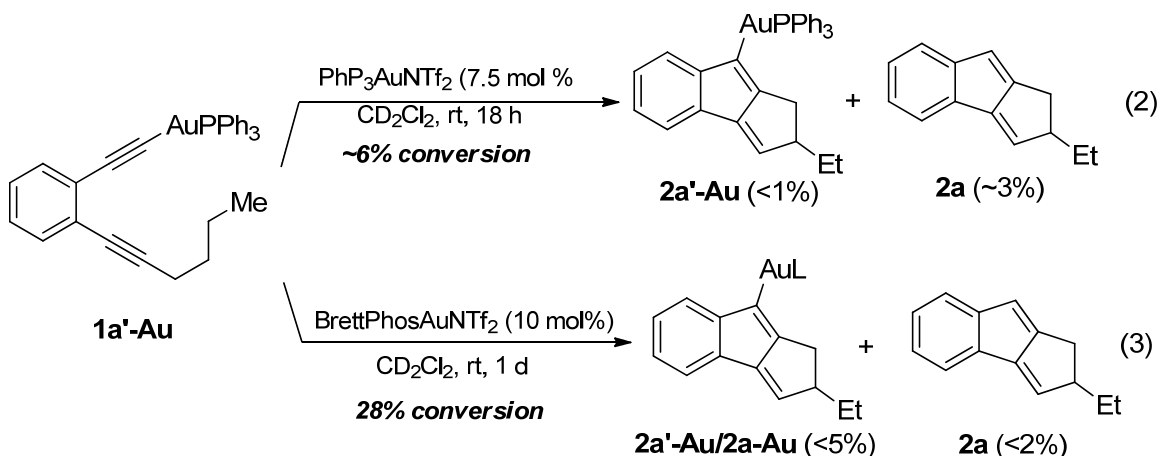

product **2a** was formed in a ~3 % yield. The overall conversion was only 6% after 18 h reaction. This result further confirmed the inefficiteness of Ph<sub>3</sub>P as the metal ligand for this reaction. The formation of **2a** is likely due to the strong acidity of Ph<sub>3</sub>PAu<sup>+</sup>, leading to higher concentration of H<sup>+</sup> in the reaction

medial in the presence of adventitious H<sub>2</sub>O.

Eq. 3 was performed using BrettPhosAuNTf<sub>2</sub> as the catalyst. Again, the reaction was not productive at all. In fact, it is worse than Eq. 2 in terms of yielded based on conversion, suggesting that some side reactions occurred competitively. This is surprising to us.

These studies strongly support the notion that BrettPhos is much more efficient than Ph<sub>3</sub>P in catalyzing this reaction. We attribute this difference partly to its steric bulk and partly to its more  $\sigma$ -donating nature.

**Reference:**

1. Taduri, B. P.; Ran, Y.-F.; Huang, C.-W.; Liu, R.-S. *Org. Lett.* **2006**, *8*, 883-886.
2. Hirano, K.; Inaba, Y.; Takahashi, N.; Shimano, M.; Oishi, S.; Fujii, N.; Ohno, H. *J. Org. Chem.* **2011**, *76*, 1212-1227.
3. Grissom, J. W.; Klingberg, D.; Huang, D.; Slattery, B. J. *J. Org. Chem.* **1997**, *62*, 603-626.
4. Cheong, P. H.-Y.; Morganelli, P.; Luzung, M. R.; Houk, K. N.; Toste, F. D. *J. Am. Chem. Soc.* **2008**, *130*, 4517-4526.
5. Adamczyk, M.; Watt, D. S.; Netzel, D. A. *J. Org. Chem.* **1984**, *49*, 4226-4237.
6. Ishii, Shingo; Zhao, Shikai; Helquist, Paul. *J. Am. Chem. Soc.*, **2000**, *122*, 5897 – 5898.
7. Toshiro Suenaga, Caroline Schutz, Tadashi Nakat. *Tetrahedron Lett.*, **2003**, *44*, 5799-5801;
8. Li, Jian-Rong; Yakovenko, Andrey A.; Lu, Weigang; Zhuang, Wenjuan; Yuan, Daqiang; Zhou, Hong-Cai; Timmons, Daren J. *J. Am. Chem. Soc.* **2010**, *132*, 17599 – 17610.



## Computational studies:

**Theoretical Methods.** For hydrocarbons with no gold, complete geometry optimizations were carried out using density functional theory (DFT) methods using Becke's three-parameter exchange functional with the Lee, Yang, and Parr correlation functional at the B3LYP/6-311G(d,p),<sup>1</sup> M06-2X/6-31+G(d,p), and M06-2X/6-311+G(d,p) levels.<sup>2</sup> Frequency calculations were carried out in order to verify that the stationary points thus obtained were true minima and to determine thermodynamic parameters for the determination of reaction energetics. For the hydrocarbons, M06/6-31+G(d,p) geometries and thermochemistry were used for later calculations to be consistent with levels used for the gold complexes. For the pyridine N-oxide and conjugate acid calculations, M06-2X/6-311+G(d,p) geometries and thermochemistry was used in place of the M06/6-31+G(d,p) energies and thermochemistry, and for other single-point calculations. Geometries and thermochemical data are found in Supplemental Table S3 below. Diffuse functions sometimes result in linear dependencies that interfere with self-consistent field (SCF) convergence in DFT methods, however single-point B3LYP/6-31+G(d,p), B3LYP/6-311+G(2df,2pd), and aug-cc-pVTZ calculations at the M06-2X/6-31+G(d,p) geometries were carried out to account for the effect of diffuse functions on reaction energetics with no SCF convergence problems until aug-cc-pVXZ-PP basis sets were used for gold. In these cases, various methods, up to xqc, were used to achieve SCF convergence, and stability tests on the wave function were done when xqc methods were required. All of these DFT single-point calculations were carried out with the scf=tight option. All M06 and M06-2X calculations were done with the Gaussian 'int=ultrafine' option.

For organogold compounds, calculations were carried out using the M06 method, shown to be optimal for metals.<sup>2</sup> The basis sets used for gold species were the LANL2DZ, LANL2TZ(f),<sup>3,4</sup> and aug-cc-pVDZ-PP<sup>4,5</sup> effective core potentials. M06/LANL2DZ and M06/6-31+G(d,p)(C,H,P)/LANL2DZ(Cu) level geometry optimizations and frequency calculations were carried out in order to verify that the stationary points thus obtained were true minima and to determine thermodynamic parameters for the determination of reaction energetics. M06 single-point calculations were done with the 6-311+G(d,p)(C,H,P)/ LANL2TZ(f)(Au), aug-cc-pVDZ-PP, and aug-cc-pVTZ-PP basis sets using M06/LANL2DZ and M06/6-31+G(d,p)(C,H,P)/LANL2DZ(Au) geometries. All M06 calculations were done with the Gaussian 'int=ultrafine' option. For non-gold species, 6-31 basis sets were used with the 5d option when energies are compared with those from 6-311+G(d,p)(C,H,P) /LANL2TZ(f)(Au) and 6-31+G(d,p)(C,H,P)/LANL2DZ(Au) bases.

Thermochemical data were calculated with zero-point energy corrections from scaled M06 frequencies using a scaling factor of 0.99 for zero-point energies.<sup>6</sup> A scaling factor of 1.00 for M06

frequencies for the thermal and entropy terms was used.<sup>6</sup> Intrinsic reaction coordinate (IRC) calculations<sup>7</sup> were carried out on transition-state structures to assure that the calculated transition states lead to the expected products and starting materials.

To establish confidence in the computational methods employed here in the analysis of the energies of organogold compounds, we have calculated energies at a variety of theoretical levels to try to estimate the limits of accuracy of the methods used. We have chosen a polarized continuum model in ether solvent for our calculations using the SMD method of Truhlar and Cramer.<sup>8</sup> Solvent effects by similar methods have been treated successfully for cases where quantitative comparison with experiment is possible.<sup>9</sup> Preliminary atom-centered density matrix propagation molecular dynamics (ADMP) calculations<sup>10</sup> for a model reaction without the benzo ring fusion and with a methyl substituent were carried out at the B3LYP/6-31G(d)/LANL2DZ(Au) level to compute reaction trajectories. All calculations were performed using the Gaussian 03 and 09 program suites.<sup>11</sup>

**Theoretical Results.** Electronic reaction energies, reaction energies, transition-state energies, and solvation energies from quantum calculations are reported for the numerous reactions studied in Tables S1 and S2. Chemical structures and a reaction mechanism are depicted in Scheme S1. Thermochemical data and structures are reported for each compound in Table S3. Figures S1 and S2 show energy diagrams and structures of the transition states and intermediates.

Table S1 contains differences in energies at several M06 DFT levels with different basis sets. Comparisons of the electronic energies,  $\Delta E_{g,e}^{\circ}$ , at each level shows that the levels are consistent, usually within 1-2 kcal/mol. Effects of zero-point energy, thermal energy and entropy at 298K are shown for the geometry optimization level in the  $\Delta E_{g,0K}^{\circ}$ ,  $\Delta H_{g,298}^{\circ}$ , and  $\Delta G_{g,298}^{\circ}$  terms, respectively. The effect of chloroform solvation with the SMD model is contained in the  $\Delta \Delta G_{solv,298}^{\circ}$  term, and the final free energy difference including all these effects in chloroform is in the  $\Delta G_{CHCl_3}^{\circ}$  term at 298K. It can be seen that solvation is predicted to play a very large role for these ionic species, and generally favoring smaller ions with high charge density, as seen in Table S2.<sup>12</sup> Smaller zero-point energy and entropy differences are also seen. Final  $\Delta G_{CHCl_3}^{\circ}$  energies with the largest basis set are shown in the far right column of Table S1.

The energy diagram in Figure S1 is based upon free energies in chloroform, while that showing the bifurcation region in Figure S2 has relative electronic energies with no zero-point energy corrections. The possibility that **E** and **J** might equilibrate through **TS1a** is relevant to the question of whether product ratios will be predictable from the dynamical factors affecting reaction trajectories as they traverse **TS1** and the ridge region or whether subsequent rapid equilibration could, in the end, make the bifurcation irrelevant to the product ratio prediction. The calculated free energy barrier in chloroform

from **E** to **J** is 7.5 kcal/mole. This is comparable to the 8.6 kcal/mol barrier for C-H insertion into a methyl group for **E** via **TS2** and significantly higher than the 4.6 kcal barrier for a secondary CH bond in **L** via **TS3**. The barrier from the lower energy intermediate **J** to **E** via **TS1a** is 11.7 kcal/mole, while the gold migration product **K** is 6.5 kcal/mol lower in free energy than **J** with a gas-phase free energy barrier for formation of **K** from **J** of only 1.5 kcal/mol from B3LYP/6-31+G(d,p)/LANL2DZ(Au) calculations. The barrier for CH insertion into a methyl group in **M** to give **N** is then 9.8 kcal/mol. So the intermediate **J** would rapidly rearrange and undergo CH insertion before equilibrating with **E**, and **E** would undergo CH insertion faster than rearrangement to **J** for secondary CH bonds. The insertion product **N** would ultimately be predicted to lead to 2,3-cyclopentano-fused naphthalenes, rather than the 1,2-fusion seen in **4** from platinum.

Figure S3 shows some bond lengths for the vinylidene structure **E** along with the sigma-bound gold complex **G**. Comparisons of bond lengths shows that the vinylidene resonance structure for **E** is a very reasonable representation of its structure. A similar comparison of atomic charges by the natural population analysis method within Gaussian 09 in Figure S4 is also most consistent with the vinylidene representation of structure **E** with the positive charge mainly on the second gold, rather than on the carbons. The triplet vinylidene was calculated to be 9.2 kcal/mol less stable in electronic energy than the singlet state at the geometry-optimized B3LYP/6-31+G(d,p)/LANL2DZ(Au) level. The CCAu angle at the charged gold decreases from 179.2° to 172.7° and some C-C bond distances increase.

Preliminary atom-centered density matrix propagation molecular dynamics (ADMP) calculations<sup>10</sup> for a model reaction without the benzo ring fusion and with a methyl substituent were carried out at the B3LYP/6-31G(d)/LANL2DZ(Au) level with step sizes of 0.07 fs for 112 to 224 fs time periods and settings of ElectronMass=-1000 (for a fictitious electron mass of 0.1 amu and uniform weighting of core and valence basis functions), geom=crowd, nosym, scf=NoVarAcc, and int=ultrafine. The trajectories were started at the simplified transition-state geometry analogous to **TS1** with random thermal energies. Of 140 trajectories, most went back to starting material, but the 29 that went to products favored the 5-membered over the 6-membered ring by 21/8, suggesting that, when statistically meaningful numbers of trajectories are collected, the 5-membered ring product will likely prevail, though not overwhelmingly. Assuming that these trajectory calculations give a reasonably accurate picture of the expected product ratio with simple phosphine ligands, the effect of the bulky BrettPhos ligand must be to steer the reaction toward the 5-membered ring product. This seems reasonable considering that one of the BrettPhos ligands is held further away from the main structure by the extra exocyclic carbon in the 5-membered ring product **E** than in the 6-membered ring product **J**. For the very large BrettPhos ligand, time-consuming trajectory calculations are entirely out of reach

computationally to test this. To confirm that such steric factors could, indeed, favor the 5-membered ring formation, however, we carried out geometry optimizations at the B3LYP/LANL2DZ and B3LYP/6-31G(d)/LANL2DZ(Au) levels on the products **E** and **J** with a full BrettPhos ligand attached in the critical position (next to the vinylidene carbon of **E** and corresponding position in **J**) and a trimethylphosphine in the other, less relevant, ligand position as shown in Figure S6. With simple phosphine ligands at this level of theory, the 6-membered ring is favored by 1.37 (3.13) kcal/mol in electronic energy and 0.96 (2.72) kcal/mol in free energy for the comparable pair of conformations chosen in Figure S6 at the B3LYP/LANL2DZ [and B3LYP/6-31G(d)/LANL2DZ(Au) (energies shown throughout in parentheses)] levels using thermochemistry from B3LYP/LANL2DZ frequencies scaled by 0.99 for ZPE and 0.96 for thermal and entropy terms.<sup>6</sup> The conformations within the BrettPhos group were chosen to correspond to that in the published X-ray structure.<sup>13</sup> Two other sets of conformations were tested as well to give similar results, but these were higher energy conformations. With the trimethylphosphino-BrettPhos ligands, these electronic and free energies now favor the five-membered ring by 1.31 (0.39) and 3.26 (2.34) kcal/mol, respectively, for a shift of 2.68 (3.52) kcal/mol in electronic energy and 4.22 (5.06) kcal/mol in free energy as a result of the steric interactions in the BrettPhos complex. We expect that this large steric effect will, in part, be felt along the energy surface on the reaction pathways and could reasonably be expected to steer the reaction course more toward the 5-membered ring product. For triethylphosphine ligands on **E** and **J**, B3LYP/LANL2DZ geometry optimizations showed a smaller steric effect of 1.21(1.65) kcal/mol in electronic energy, suggesting that reaction products derived from **J** would be more probable there than with BrettPhos ligands.

Further confirmation that the steric effect in the products **E** and **J** was sought at points along the energy surface was found in B3LYP/SDD level calculations. Geometry optimizations with these lower-level calculations show separate transition states for formation of the 5- and 6-membered ring products instead of the ridge-valley inflection and bifurcation surface for higher-level calculations. With larger basis sets and the M06 method, M06/6-31G(d)/LANL2DZ(Au) and M06/6-31+G(d,p)/LANL2DZ(Au), however, the bifurcated surface is seen. Using the two B3LYP/SDD transition-state geometries for the core structures, partial geometry optimizations with the trimethylphosphino and BrettPhos ligands were carried out. These calculations were very slow to converge, but after about 300 optimization steps and 1800 cpu-hours the energies largely leveled out. Full geometry optimization led to a slightly (0.3 kcal/mole) lower energy structure for the transition state leading to the **J** BrettPhos product, but did not converge for the **E** BrettPhos product. These electronic energies favored the 5-membered ring transition state by about 2 kcal/mol, similar to the 2.06 kcal/mole electronic energy difference (2.65 kcal/mol free energy difference) with PH<sub>3</sub> ligands, and consistent with experiment. This suggests that the steric

effects in the **E** and **J** trimethylphosphino-BrettPhos products is likely diminished at these transition states, but might be felt in transitional structures along the energy surface leading to products and that this might lead to a steering of trajectories toward the 5-membered ring product. Within the traditional transition state model, as applied through B3LYP/SDD level calculations, there is still a significant approximate 2-3 kcal/mol free energy preference for the 5-membered ring product with the BrettPhos ligand as observed experimentally.

**Acknowledgment.** We are pleased to acknowledge support from the National Center for Supercomputing Applications, NSF (CHE100123) utilizing the NCSA Ember system and the use of software for 3-D drawings from CYLview, 1.0b; Legault, C. Y., Université de Sherbrooke, 2009 (<http://www.cylview.org>).

## References:

- 1 A. D. Becke *J. Chem. Phys.* **1993**, *98*, 5648.
- 2 Y. Zhao and D. G. Truhlar, *Theor. Chem. Acc.*, **120** (2008) 215-41.
- 3 P. J. Hay and W. R. Wadt *J. Chem. Phys.* *82*, 299 (1985).
- 4 From EMSL Library of Basis Set Exchange: Schuchardt, K.L., Didier, B.T., Elsethagen, T., Sun, L., Gurumoorthi, V., Chase, J., Li, J., and Windus, T.L. *J. Chem. Inf. Model.*, *47*(3), 1045-1052, 2007.
- 5 K.A. Peterson and C. Puzzarini, *Theor. Chem. Acc.*, *114*, 283 (2005).
- 6 (a) A. P. Scott, L. Radom *J. Phys. Chem.* **1996**, *100*, 16502. (b) D. H. Aue, J. Caras, M. Guidoni, to be published. We have evaluated optimum scale factors for numerous organic molecules and find that the DFT scale factors differ with basis set between 0.96 for the B3LYP/4-31G or 6-31G(d) levels to 0.97 for the B3LYP/ 6-311G(d,p) level. For thermal terms and entropies, such variation has little effect, and one may argue that a scaling factor close to 1.00 might be best for the dominant low frequencies (ref. 6a). For zero point energies (ZPE), the 0.99 scale factor fits experimental zero-point energies for organic molecules reasonably well for B3LYP methods and 0.98 for M06-2X/6-311+G(d,p). Here we chose a 0.99 scale factor for ZPE with the M06 frequency calculations.
- 7 C. Gonzalez, H. B. Schlegel *J. Phys. Chem.* **1990**, *94*, 5523.
- 8 A. V. Marenich, C. J. Cramer, and D. G. Truhlar, *J. Phys. Chem. B*, *113* (2009) 6378-96.
- 9 (a) K. S. Raymond, A. K. Grafton, R. A. Wheeler, *J. Phys. Chem. B* **1997**, *101*, 623 (and references therein); (b) M. Namazian, P. Norouzi, *J. Electroanal. Chem.* **2004**, *573*, 49.
- 10 H. B. Schlegel, S. S. Iyengar, X. Li, J. M. Millam, G. A. Voth, G. E. Scuseria, and M. J. Frisch, *J. Chem. Phys.*, **117** (2002) 8694-704.
- 11 Gaussian 09, Revision **A.1**, M. J. Frisch, G. W. Trucks, H. B. Schlegel, G. E. Scuseria, M. A. Robb, J. R. Cheeseman, G. Scalmani, V. Barone, B. Mennucci, G. A. Petersson, H. Nakatsuji, M. Caricato, X. Li, H. P. Hratchian, A. F. Izmaylov, J. Bloino, G. Zheng, J. L. Sonnenberg, M. Hada, M. Ehara, K. Toyota, R. Fukuda, J. Hasegawa, M. Ishida, T. Nakajima, Y. Honda, O. Kitao, H. Nakai, T. Vreven, J. A. Montgomery, Jr., J. E. Peralta, F. Ogliaro, M. Bearpark, J. J. Heyd, E. Brothers, K. N. Kudin, V. N. Staroverov, R. Kobayashi, J. Normand, K. Raghavachari, A. Rendell, J. C. Burant, S. S. Iyengar, J. Tomasi, M. Cossi, N. Rega, J. M. Millam, M. Klene, J. E. Knox, J. B. Cross, V. Bakken, C. Adamo, J. Jaramillo, R. Gomperts, R. E. Stratmann, O. Yazyev, A. J. Austin, R. Cammi, C. Pomelli, J. W. Ochterski, R. L. Martin, K. Morokuma, V. G. Zakrzewski, G. A. Voth, P. Salvador, J. J.

Dannenberg, S. Dapprich, A. D. Daniels, Ö. Farkas, J. B. Foresman, J. V. Ortiz, J. Cioslowski, and D. J. Fox, Gaussian, Inc., Wallingford CT, 2009.

- 12 (a) D. H. Aue, H. M. Webb, and M. T. Bowers, *J. Am. Chem. Soc.* **1976**, *98*, 318. (b) H. P. Hopkins Jr., D. V. Jahagirdar, S. P. Moulik, D. H. Aue, H. M. Webb, W. R. Davidson, and M. D. Pedley, *J. Am. Chem. Soc.*, **1984**, *106*, 4341. (c) D. H. Aue, H. M. Webb, W. R. Davidson, P. Toure, H. P. Hopkins, Jr., S. P. Moulik, and D. V. Jahagirdar, *J. Am. Chem. Soc.* **1991**, *113*, 1770(1991).
- 13 Ye, L.; He, W.; Zhang, L. *Angew. Chem., Int. Ed.* **2011**, *50*, 3236-3239.

Scheme S1.

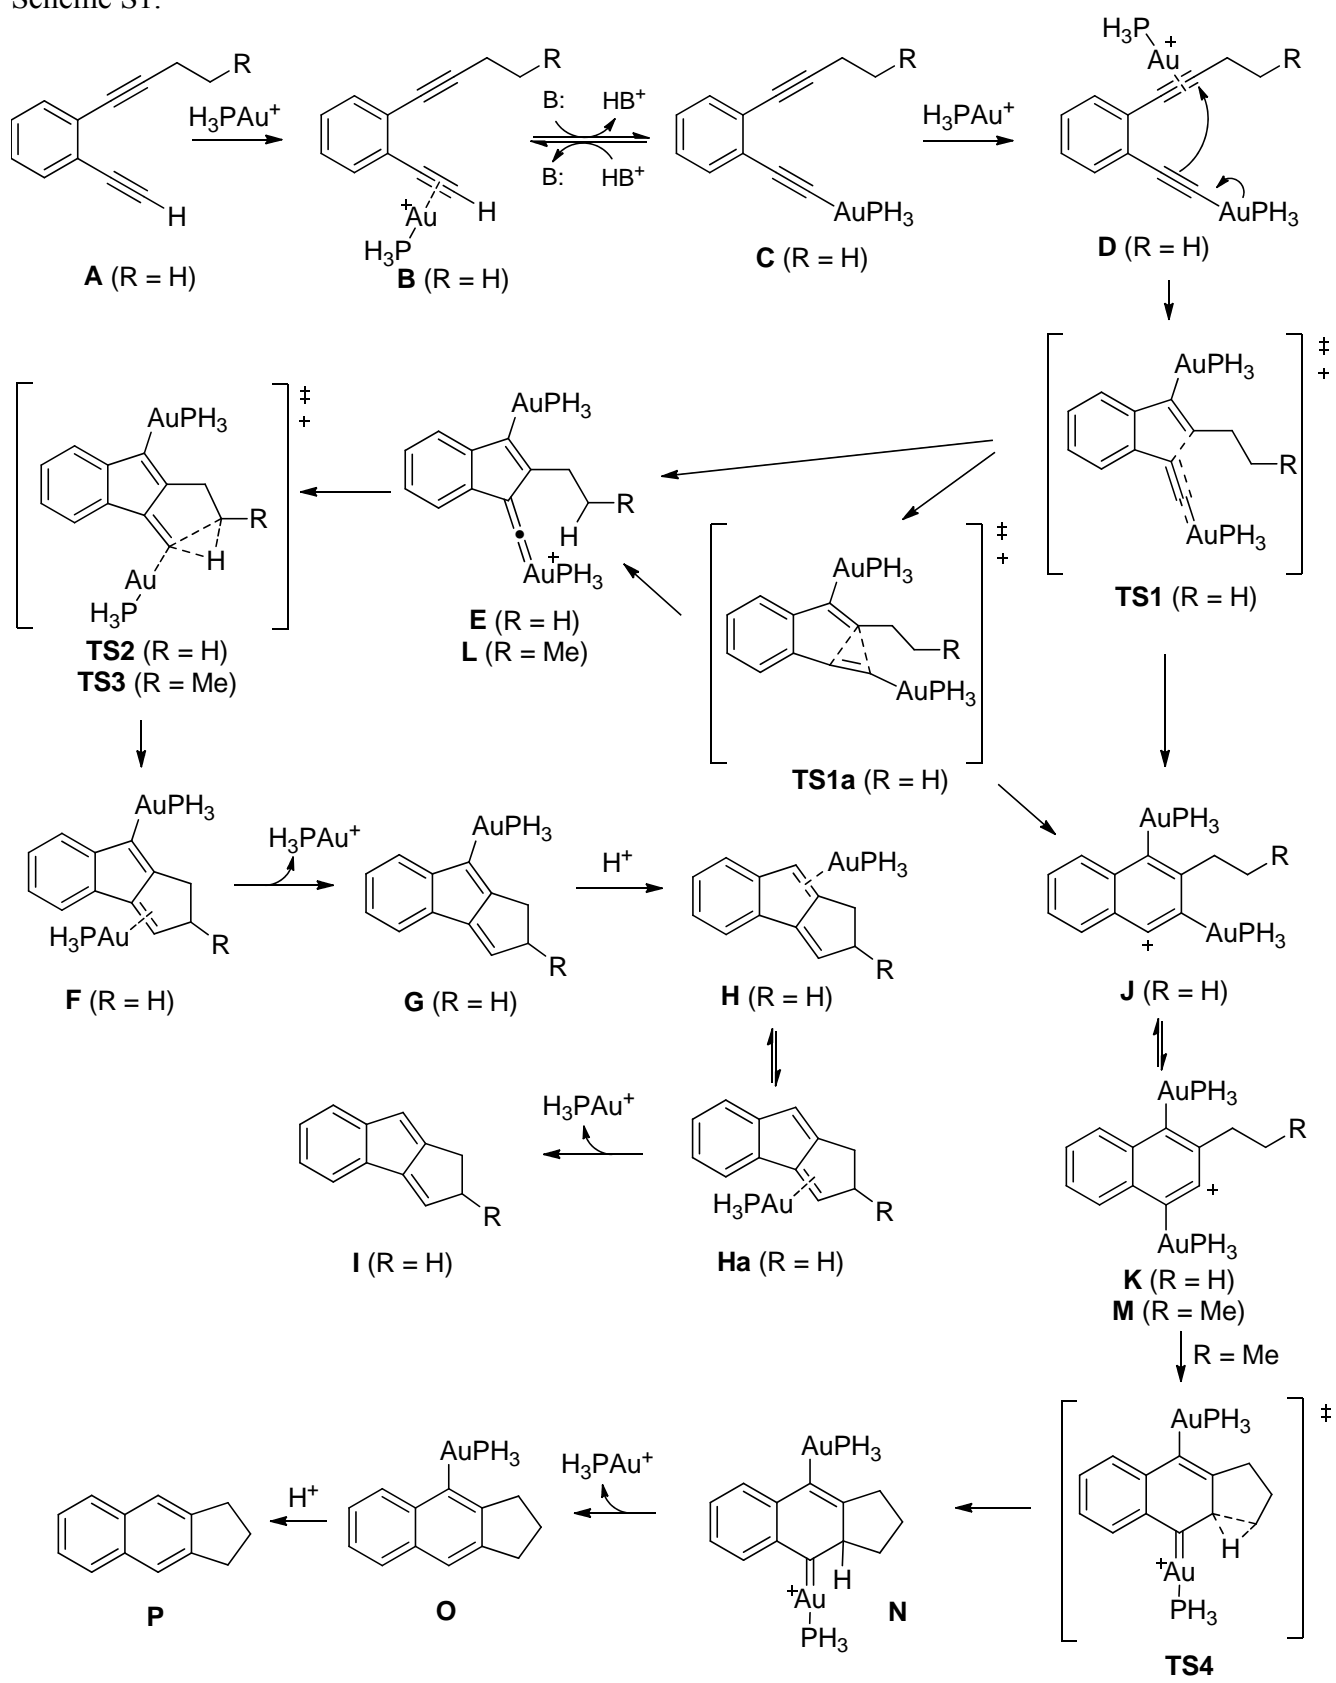

**Figure S1.** Free energy diagram calculated in chloroform at the M06/aug-cc-pVTZ-PP(SMD)//M06/6-31+G(d,p)/LANL2DZ(Cu) level. For proton-transfer and ligand-transfer reactions, energy barriers were not computed and small barriers are shown in the diagram simply for clarity. All relative free energies in kcal/mol at 298K.

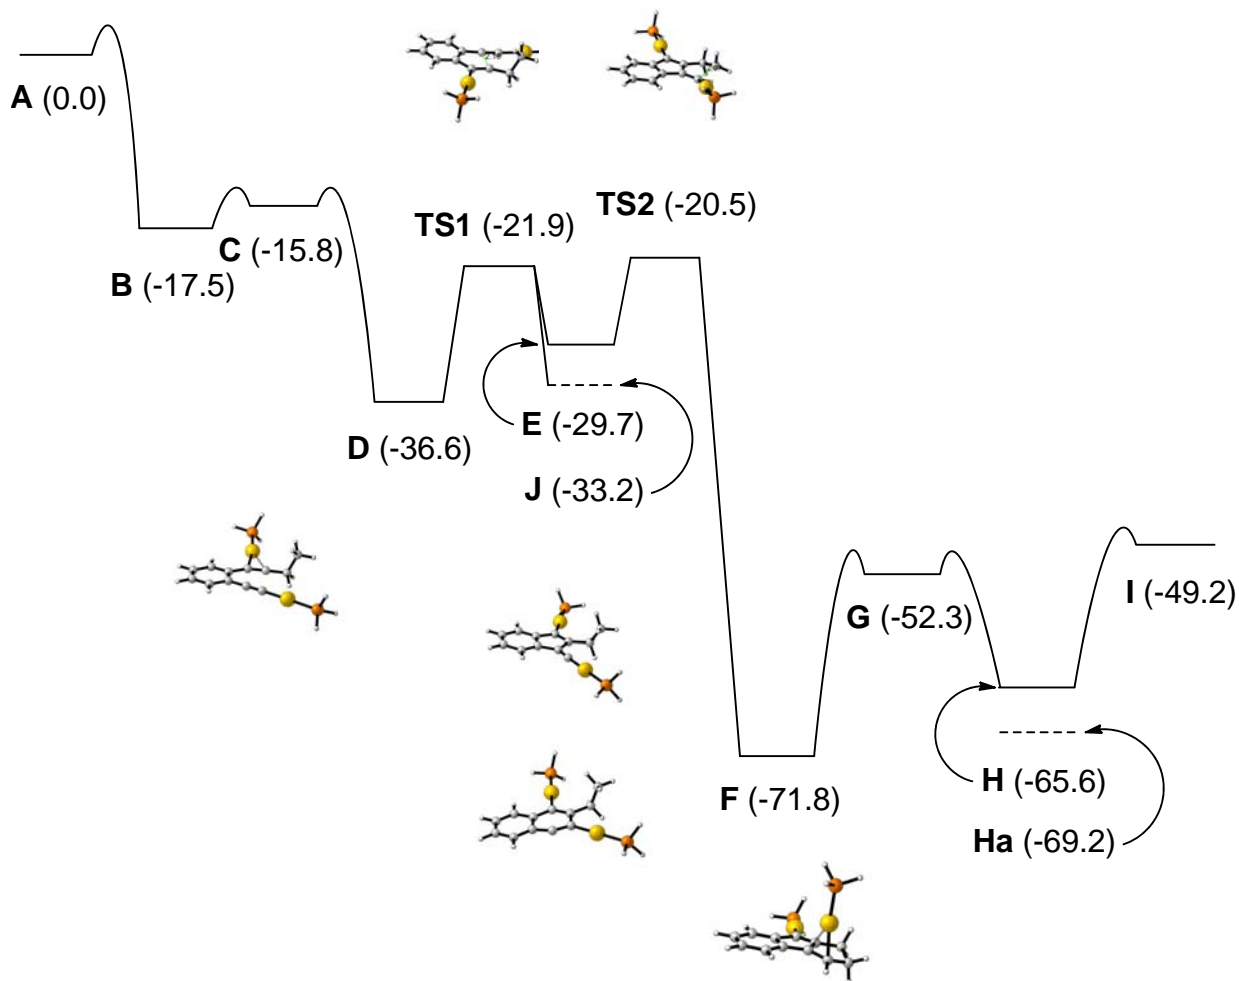



**Figure S2.** Energy diagram showing a bifurcation at a ridge-valley inflection, calculated at the M06/aug-cc-pVTZ-PP(SMD)//M06/6-31+G(d,p)/LANL2DZ(Cu) level. Relative electronic energies in parentheses, relative free energies in chloroform in brackets, all in kcal/mol at 298K. For pictures of typical 3D surfaces see Ess, D. H.; Wheeler, S. E.; Iafe, R. G.; Xu, L.; Çelebi-Ölçüm, N.; Houk, K. N. *Angew. Chem., Int. Ed.* **2008**, *47*, 7592-7601.

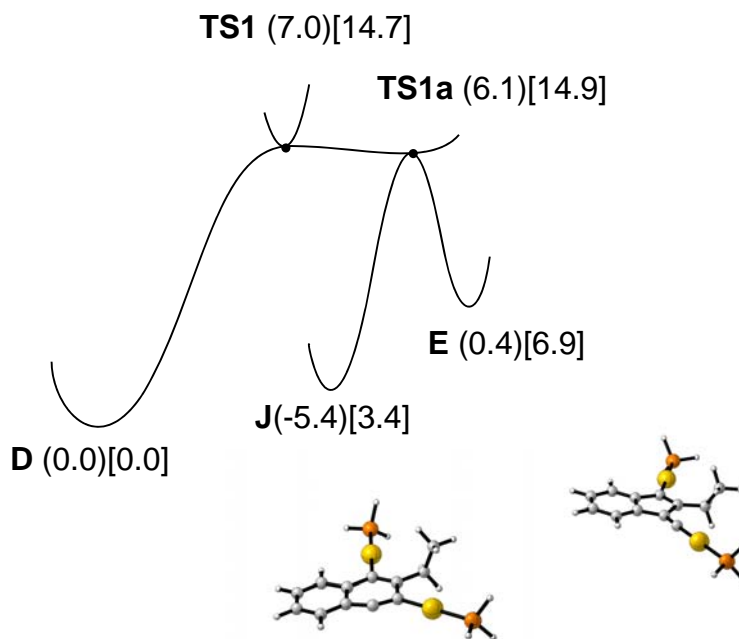

**Figure S3.** Bond lengths in Angstroms for intermediates **E** and **G** at the geometry-optimized M06/6-31+G(d,p)/LANL2DZ(Cu) level.

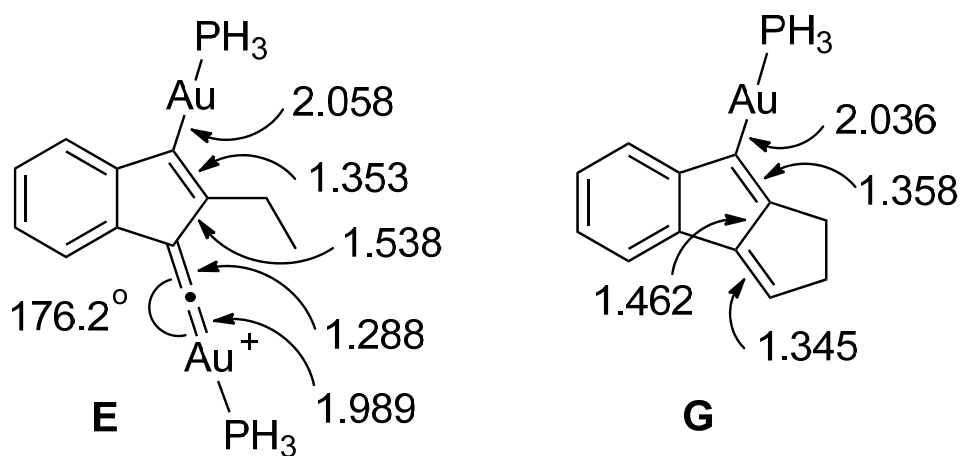

**Figure S4.** Natural population analysis charges for intermediates **E** and **G** at the geometry-optimized M06/6-31+G(d,p)/LANL2DZ(Cu) level.

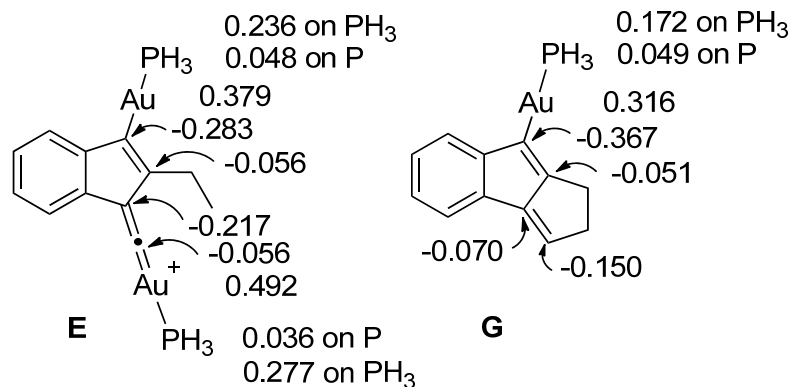

**Figure S5.** Structures of the intermediates and transition states from geometries optimized at the M06/6-31+G(d,p)/LANL2DZ(Cu) level.

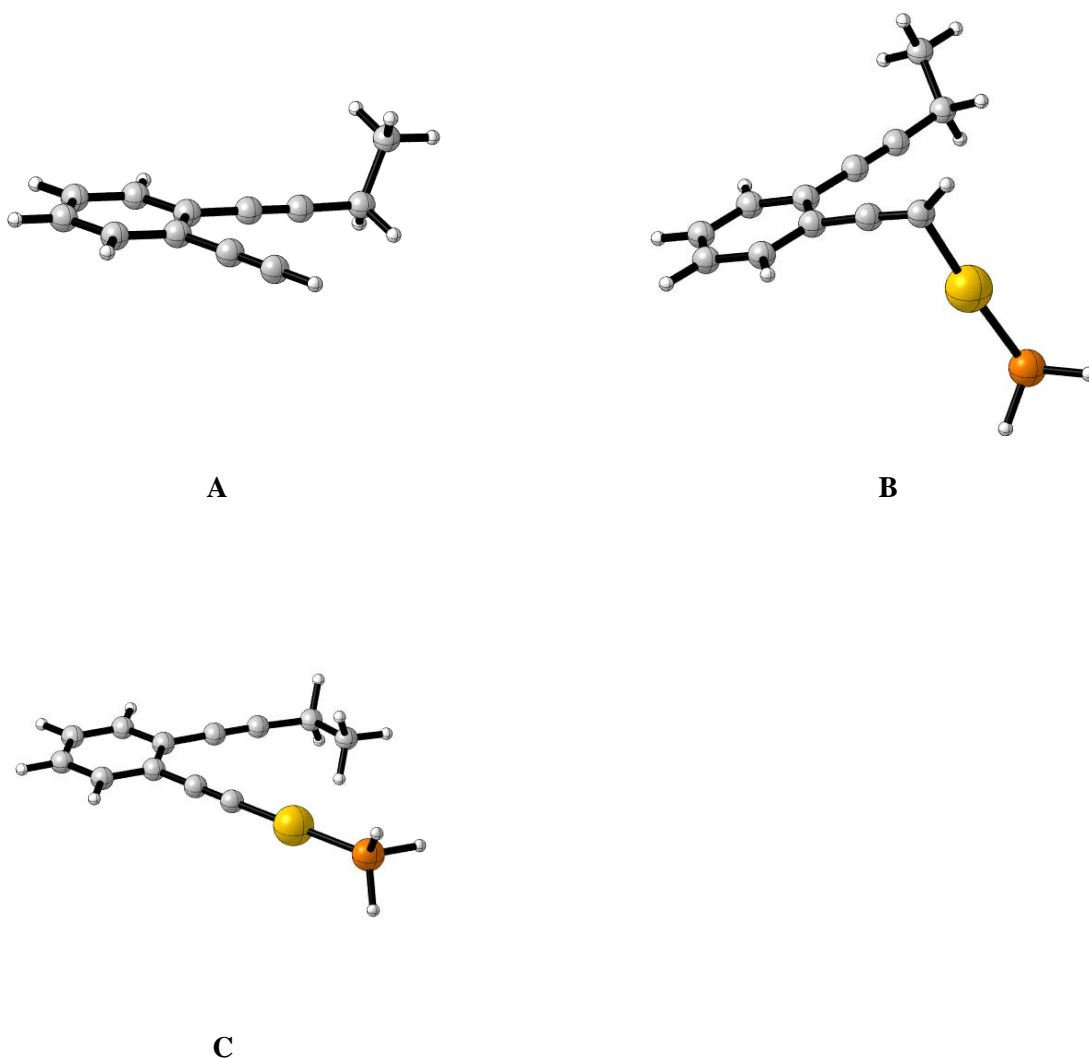

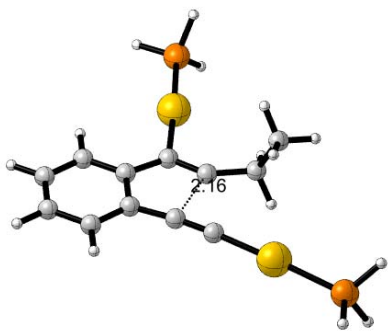

**TS1**

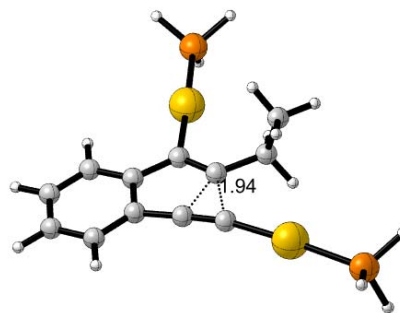

**TS1a**

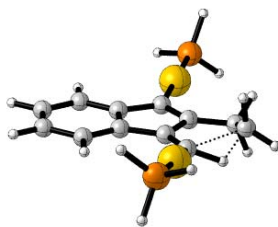

**TS2**

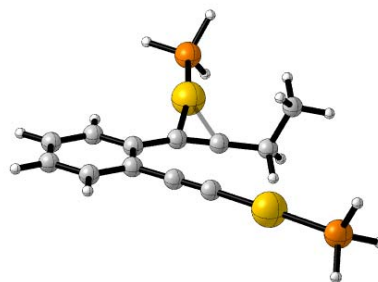

**D**

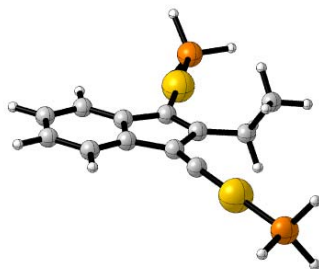

**E**

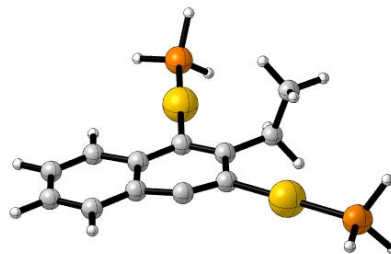

**J**

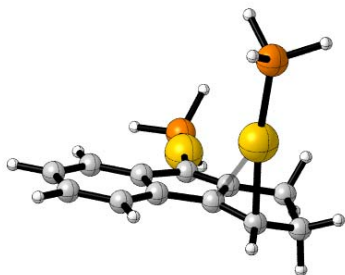

**F**

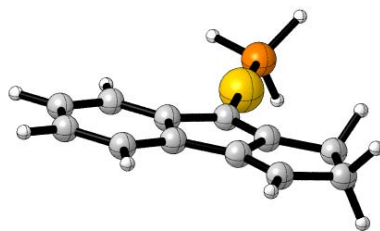

**G**

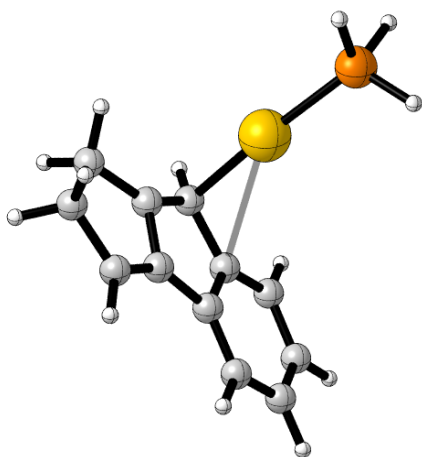

**H**

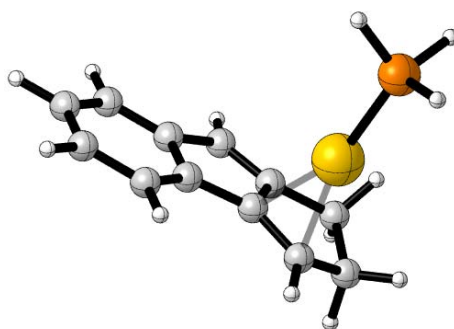

**Ha**

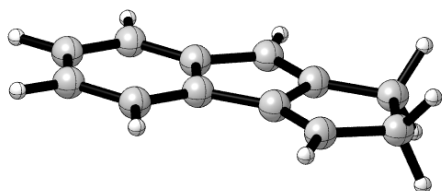

**I**

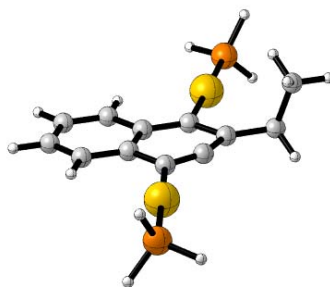

**K**

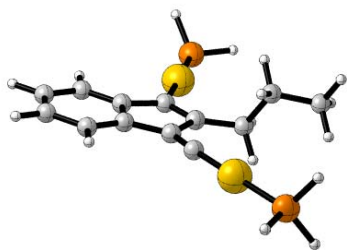

**L**

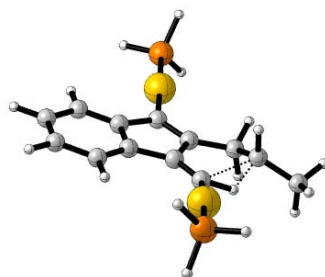

**TS3**

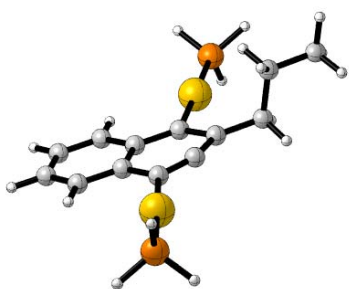

**M**

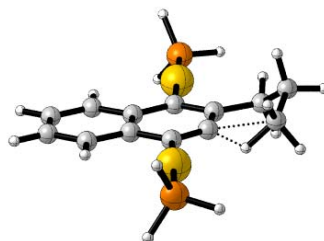

**TS4**

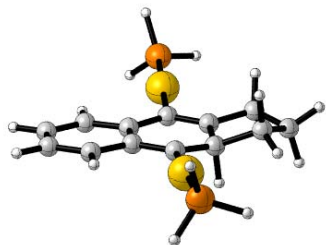

**N**

**Figure S6.** Structures of the trimethylphosphino-BrettPhos complexes of the 5- and 6-membered ring intermediates **E** and **J**, respectively, optimized at the B3LYP/LANL2DZ level.

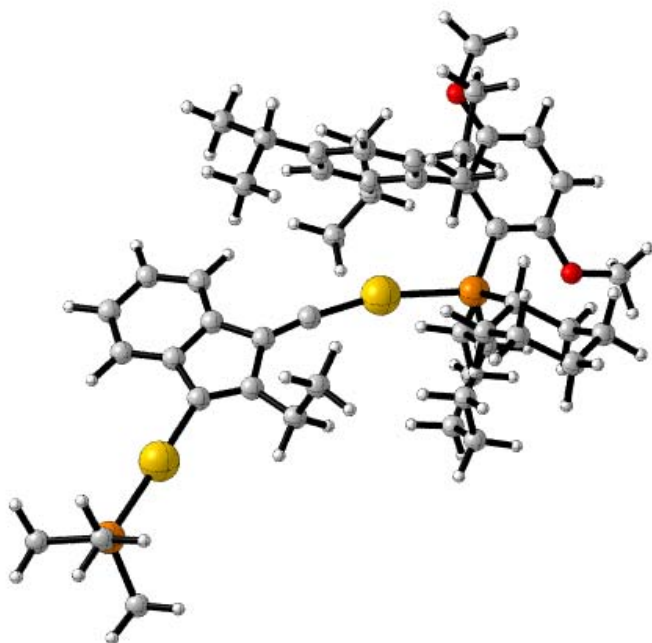

**X**

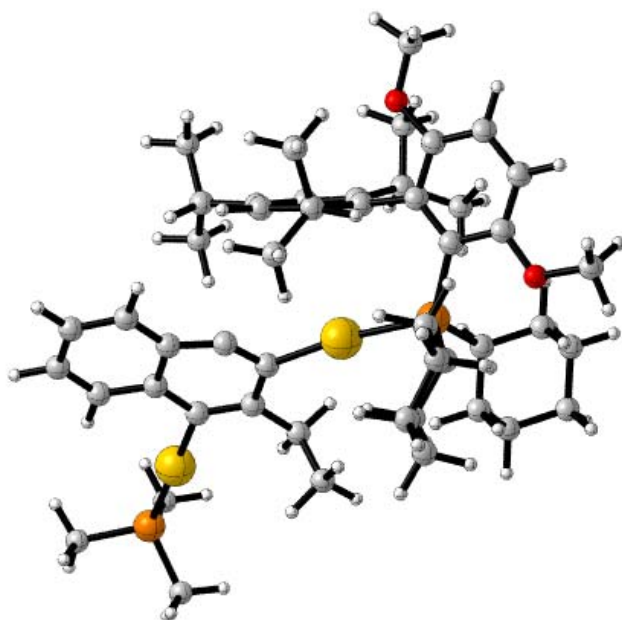

**Y**

Table S1. Reaction energies of 3,4-benzoocta-3-ene-1,5diyne with  $\text{PH}_3\text{Au}^+$  from quantum calculations at 298K at M06/6-31+G(d,p)/LANL2DZ(Au) level. (All values in kcal/mol).

| Reaction Step:                                               | M06/6-31+G(d,p)/LANL2DZ(Au) <sup>a</sup> |                           |                            |                            |                                    | SMD <sup>a,b</sup>                         | M06/6-311+G(d,p)<br>/LANL2TZ(f)(Au) <sup>a</sup> | M06/aug-cc-pVDZ/<br>aug-cc-pVDZ-<br>PP(Au) <sup>a</sup> | M06/aug-cc-pVTZ/<br>aug-cc-pVTZ-PP(Au) <sup>a</sup> |                                    |
|--------------------------------------------------------------|------------------------------------------|---------------------------|----------------------------|----------------------------|------------------------------------|--------------------------------------------|--------------------------------------------------|---------------------------------------------------------|-----------------------------------------------------|------------------------------------|
|                                                              | $\Delta E_{g,e}^{\circ}$                 | $\Delta E_{g,0K}^{\circ}$ | $\Delta H_{g,298}^{\circ}$ | $\Delta G_{g,298}^{\circ}$ | $\Delta G_{\text{CHCl}_3}^{\circ}$ | $\Delta \Delta G_{\text{sol},298}^{\circ}$ | $\Delta E_{g,e}^{\circ}$                         | $\Delta E_{g,e}^{\circ}$                                | $\Delta E_{g,e}^{\circ}$                            | $\Delta G_{\text{CHCl}_3}^{\circ}$ |
| <b>A to B</b>                                                | -51.70                                   | -51.20                    | -50.69                     | -41.76                     | -15.03                             | 26.73                                      | -52.81                                           | -56.34                                                  | -54.14                                              | -17.46                             |
| <b>B to C</b>                                                | 13.85                                    | 15.73                     | 15.60                      | 16.54                      | 2.23                               | -14.31                                     | 11.50                                            | 12.26                                                   | 13.31                                               | 1.70                               |
| <b>C to D</b>                                                | -57.78                                   | -57.75                    | -57.01                     | -48.28                     | -17.84                             | 30.44                                      | -59.49                                           | -62.91                                                  | -60.72                                              | -20.79                             |
| <b>D to E</b>                                                | -4.26                                    | -3.67                     | -4.43                      | -1.43                      | 2.22                               | 3.65                                       | -1.65                                            | -4.37                                                   | 0.41                                                | 6.90                               |
| <b>E to F</b>                                                | -46.24                                   | -44.13                    | -45.00                     | -42.64                     | -43.61                             | -0.96                                      | -45.56                                           | -46.43                                                  | -44.74                                              | -42.12                             |
| <b>F to G</b>                                                | 58.67                                    | 57.83                     | 57.38                      | 47.14                      | 17.01                              | -30.12                                     | 61.30                                            | 62.05                                                   | 61.13                                               | 19.47                              |
| <b>G to H</b>                                                | -21.66                                   | -21.86                    | -22.17                     | -21.24                     | -13.51                             | 7.72                                       | -19.88                                           | -19.20                                                  | -21.44                                              | -13.29                             |
| <b>H to I</b>                                                | 47.88                                    | 47.16                     | 46.65                      | 36.83                      | 13.22                              | -23.61                                     | 50.78                                            | 51.59                                                   | 51.03                                               | 16.38                              |
| <b>Overall Rxn A to I</b>                                    | -61.24                                   | -57.88                    | -59.66                     | -54.84                     | -55.30                             | -0.46                                      | -55.82                                           | -63.35                                                  | -55.15                                              | -49.21                             |
| <b>E to J</b>                                                | -5.99                                    | -6.07                     | -6.13                      | -5.38                      | -3.75                              | 1.63                                       | -5.81                                            | -5.18                                                   | -5.78                                               | -3.54                              |
| <b>H to Ha</b>                                               | -5.30                                    | -5.30                     | -5.29                      | -5.62                      | -4.32                              | 1.29                                       | -4.80                                            | -4.92                                                   | -4.58                                               | -3.59                              |
| $\Delta G^{\ddagger}$ for <b>TS1 (D to E)</b> <sup>c</sup>   | 4.39                                     | 4.38                      | 3.62                       | 6.98                       | 12.04                              | 5.06                                       | 5.98                                             | 4.99                                                    | 7.04                                                | 14.68                              |
| $\Delta \Delta G^{\ddagger}$ <b>TS1 to TS1a</b> <sup>c</sup> | -1.33                                    | -1.01                     | -1.30                      | -0.08                      | -0.21                              | -0.13                                      | -0.94                                            | -1.69                                                   | -0.89                                               | 0.23                               |
| $\Delta G^{\ddagger}$ for <b>TS1a (J to E)</b> <sup>c</sup>  | 13.32                                    | 13.12                     | 12.88                      | 13.72                      | 13.36                              | -0.36                                      | 12.50                                            | 12.86                                                   | 11.51                                               | 11.55                              |
| $\Delta G^{\ddagger}$ for <b>TS2 (E to F)</b> <sup>c</sup>   | 7.36                                     | 6.42                      | 5.51                       | 8.32                       | 8.35                               | 0.03                                       | 7.97                                             | 7.68                                                    | 8.12                                                | 9.11                               |
| <b>J to K</b>                                                | -6.74                                    | -6.36                     | -6.35                      | -6.57                      | -6.89                              | -0.32                                      | -6.33                                            | -6.77                                                   | -6.43                                               | -6.58                              |
| $\Delta G^{\ddagger}$ for <b>TS3 (from L)</b> <sup>c</sup>   | 2.38                                     | 1.29                      | 0.46                       | 3.32                       | 3.90                               | 0.58                                       | 3.09                                             | 1.54                                                    | 3.34                                                | 4.86                               |
| <b>M to N</b>                                                | -30.85                                   | -28.89                    | -30.01                     | -26.46                     | -24.08                             | 2.38                                       | -30.56                                           | -31.75                                                  |                                                     |                                    |
| $\Delta G^{\ddagger}$ for <b>TS4 (M to N)</b> <sup>c</sup>   | 7.97                                     | 7.52                      | 6.55                       | 9.43                       | 8.70                               | -0.73                                      | 8.24                                             | 6.42                                                    | 8.96                                                | 9.70                               |

a) Geometry optimized at the M06/6-31+G(d,p)/LANL2DZ(Au) level.

b) Solvation energy term from the difference in free energies of solvation from SMD model M06/6-31+G(d,p)/LANL2DZ//M06/6-31+G(d,p)/LANL2DZ in chloroform. (Ref. 8)

c) Activation energies, enthalpies, and free energies in appropriate columns.

Table S2. Free energies of solvation in chloroform calculated by SMD model at 298K. (All values in kcal/mol)<sup>a</sup>

|                        | $\Delta\Delta G^{\circ}_{\text{CHCl}_3, 298}$ |
|------------------------|-----------------------------------------------|
| <b>A</b>               | -10.00                                        |
| <b>B</b>               | -45.21                                        |
| <b>C</b>               | -17.20                                        |
| <b>D</b>               | -48.70                                        |
| <b>E</b>               | -45.05                                        |
| <b>F</b>               | -46.01                                        |
| <b>G</b>               | -14.19                                        |
| <b>H</b>               | -48.79                                        |
| <b>Ha</b>              | -47.50                                        |
| <b>I</b>               | -10.46                                        |
| <b>J</b>               | -43.42                                        |
| <b>K</b>               | -43.73                                        |
| <b>L</b>               | -45.64                                        |
| <b>M</b>               | -44.27                                        |
| <b>N</b>               | -41.89                                        |
| <b>TS1</b>             | -43.64                                        |
| <b>TS1a</b>            | -43.77                                        |
| <b>TS2</b>             | -45.02                                        |
| <b>TS3</b>             | -45.06                                        |
| <b>TS4</b>             | -45.00                                        |
| pyridine N-oxide       | -9.67                                         |
| prot. pyridine N-oxide | -52.00                                        |
| PH3Au+                 | -61.94                                        |

---

a) Solvation free energy in chloroform from the SMD model at the M06/6-31+G(d,p)/LANL2DZ(Cu)//M06/6-31+G(d,p)/LANL2DZ(Cu) level. (Ref. 8)



Table S3. Calculated geometries, thermochemical data, and vibrational frequencies for hydrocarbons and gold complexes. Compound numbering from Supporting Information schemes.

1-ethynyl-2-but-1'-yn-1'-yl-benzene (3,4-benzoocta-3-ene-1,5diyne) (A):

Processing: etbendiyn6plam6.log

PG=C01

|        |             |                 |
|--------|-------------|-----------------|
| Method | BasisSet    | Imaginary Freqs |
| RM06   | 6-31+G(d,p) | 0               |

HF Energy

-462.8225160

|           |         |         |        |        |
|-----------|---------|---------|--------|--------|
| ZPE       | E298    | S298    | Strans | Srot   |
| 109.88371 | 117.140 | 107.885 | 41.007 | 31.174 |

Processing: etbendiyn6plam6.log

22

|   |           |           |           |
|---|-----------|-----------|-----------|
| C | 1.305667  | 0.723803  | 0.016160  |
| C | 0.525853  | -0.449288 | -0.119484 |
| C | 2.695061  | 0.613066  | 0.161077  |
| C | 1.167830  | -1.695399 | -0.104959 |
| C | 3.312626  | -0.630374 | 0.173061  |
| C | 2.545704  | -1.787614 | 0.039754  |
| H | 3.280984  | 1.523497  | 0.264016  |
| H | 0.561179  | -2.591891 | -0.209878 |
| H | 4.391856  | -0.697731 | 0.286366  |
| H | 3.023577  | -2.764382 | 0.048401  |
| C | 0.697407  | 2.013140  | 0.006614  |
| C | -0.889152 | -0.375615 | -0.269615 |
| C | 0.202385  | 3.118315  | 0.001044  |
| C | -2.093266 | -0.318445 | -0.407245 |
| C | -3.542626 | -0.245411 | -0.533670 |
| C | -4.260518 | -0.548166 | 0.781872  |
| H | -3.820301 | 0.756086  | -0.890382 |
| H | -3.874691 | -0.947063 | -1.311630 |
| H | -5.346305 | -0.482237 | 0.654104  |
| H | -3.961222 | 0.161469  | 1.560213  |
| H | -4.016431 | -1.555149 | 1.136435  |
| H | -0.240473 | 4.089331  | -0.005301 |

Population analysis using the SCF density.

|       |             |          |        |
|-------|-------------|----------|--------|
| Label | Frequencies | IR Inten | Dipole |
| A     | 3467.7222   | 69.6164  | 0.7336 |
| A     | 3202.0500   | 19.0132  |        |

|   |           |         |
|---|-----------|---------|
| A | 3194.5447 | 15.7866 |
| A | 3186.2744 | 3.9882  |
| A | 3178.0338 | 0.2903  |
| A | 3134.0568 | 22.5376 |
| A | 3131.6101 | 30.5790 |
| A | 3069.5057 | 5.0348  |
| A | 3038.8892 | 42.4049 |
| A | 3025.6387 | 32.3638 |
| A | 2349.0838 | 18.1182 |
| A | 2219.9570 | 5.7002  |
| A | 1660.6853 | 4.7641  |
| A | 1619.8972 | 1.8078  |
| A | 1517.5382 | 29.0721 |
| A | 1473.9763 | 4.6307  |
| A | 1468.7250 | 9.5904  |
| A | 1464.3924 | 10.9126 |
| A | 1446.9714 | 6.1814  |
| A | 1387.7551 | 3.4984  |
| A | 1357.8434 | 1.3932  |
| A | 1342.0535 | 16.6686 |
| A | 1289.0787 | 0.9142  |
| A | 1264.9152 | 0.0886  |
| A | 1263.0146 | 0.0476  |
| A | 1218.8304 | 0.6356  |
| A | 1161.5648 | 0.0632  |
| A | 1117.4981 | 3.9930  |
| A | 1084.3383 | 0.4271  |
| A | 1077.4421 | 7.6095  |
| A | 1065.8065 | 3.6461  |
| A | 1030.0339 | 2.4982  |
| A | 989.8512  | 0.0007  |
| A | 959.7214  | 1.9668  |
| A | 911.5478  | 1.0023  |
| A | 884.4558  | 0.0111  |
| A | 786.6047  | 4.4475  |
| A | 769.0352  | 4.2466  |
| A | 768.2290  | 55.3468 |
| A | 752.0603  | 4.3118  |
| A | 690.1058  | 35.1635 |
| A | 682.8158  | 15.6287 |
| A | 656.4661  | 58.3632 |
| A | 594.9441  | 1.2242  |
| A | 590.1458  | 1.2856  |
| A | 566.9101  | 2.2371  |
| A | 545.0975  | 1.5089  |
| A | 498.0077  | 0.3974  |
| A | 457.1183  | 0.6634  |
| A | 389.5059  | 2.7329  |
| A | 377.0974  | 1.4523  |

|   |          |        |
|---|----------|--------|
| A | 329.3471 | 1.0943 |
| A | 318.0621 | 1.0997 |
| A | 214.5498 | 0.0808 |
| A | 178.1480 | 1.7135 |
| A | 154.7616 | 2.5501 |
| A | 126.0051 | 1.4184 |
| A | 72.0628  | 1.0144 |
| A | 68.3705  | 1.3173 |
| A | 24.0166  | 0.0302 |

Processing: etbendiytm6x.log  
PG=C01

| Method | BasisSet     | Imaginary Freqs |
|--------|--------------|-----------------|
| RM062X | 6-311+G(d,p) | 0               |

HF Energy  
-463.0908299

| ZPE       | E298    | S298    | Strans | Srot   |
|-----------|---------|---------|--------|--------|
| 111.04856 | 118.301 | 110.298 | 41.007 | 31.156 |

Processing: etbendiytm6x.log  
22

|   |           |           |           |
|---|-----------|-----------|-----------|
| C | 1.291471  | 0.726293  | 0.012124  |
| C | 0.537867  | -0.458282 | -0.122098 |
| C | 2.679701  | 0.647705  | 0.163472  |
| C | 1.200650  | -1.690544 | -0.099870 |
| C | 3.320166  | -0.582300 | 0.183032  |
| C | 2.578010  | -1.753550 | 0.050986  |
| H | 3.244197  | 1.566249  | 0.265055  |
| H | 0.615299  | -2.595652 | -0.203300 |
| H | 4.395852  | -0.627926 | 0.300976  |
| H | 3.073594  | -2.716697 | 0.065725  |
| C | 0.652210  | 2.006939  | -0.005433 |
| C | -0.882832 | -0.409147 | -0.277931 |
| C | 0.133176  | 3.090602  | -0.018221 |
| C | -2.078802 | -0.366394 | -0.413187 |
| C | -3.533481 | -0.303445 | -0.541206 |
| C | -4.243653 | -0.508079 | 0.803271  |
| H | -3.805430 | 0.667454  | -0.964256 |
| H | -3.860591 | -1.062534 | -1.257123 |
| H | -5.325601 | -0.450970 | 0.673135  |
| H | -3.937574 | 0.257256  | 1.517280  |
| H | -3.995171 | -1.483341 | 1.223544  |
| H | -0.331467 | 4.047375  | -0.030670 |

Processing etbendiyn6be.log  
PG=C01

Method BasisSet Imaginary Freqs  
RB3LYP 6-311G(d,p) 0

HF Energy  
-463.2962070

Thermochemistry will use frequencies scaled by 0.9600

| ZPE       | E298    | S298    | Strans | Srot   |
|-----------|---------|---------|--------|--------|
| 105.39932 | 112.912 | 109.093 | 41.007 | 31.088 |

22

|   |           |           |           |
|---|-----------|-----------|-----------|
| C | -1.174893 | 0.768743  | -0.000022 |
| C | -0.604568 | -0.531347 | -0.000006 |
| C | -2.572078 | 0.905051  | 0.000000  |
| C | -1.461266 | -1.644536 | 0.000041  |
| C | -3.399139 | -0.209992 | 0.000038  |
| C | -2.840809 | -1.488386 | 0.000060  |
| H | -2.995088 | 1.902125  | -0.000013 |
| H | -1.022020 | -2.634533 | 0.000054  |
| H | -4.475484 | -0.083228 | 0.000052  |
| H | -3.481051 | -2.363105 | 0.000091  |
| C | -0.354973 | 1.934998  | -0.000046 |
| C | 0.806897  | -0.721391 | -0.000045 |
| C | 0.312538  | 2.937110  | -0.000055 |
| C | 1.999362  | -0.907832 | -0.000094 |
| C | 3.446805  | -1.095123 | -0.000175 |
| C | 4.229925  | 0.229884  | 0.000239  |
| H | 3.730079  | -1.691697 | 0.875118  |
| H | 3.730042  | -1.691115 | -0.875877 |
| H | 5.305332  | 0.035087  | 0.000125  |
| H | 3.986208  | 0.823488  | 0.883571  |
| H | 3.986125  | 0.824076  | -0.882674 |
| H | 0.909057  | 3.815834  | -0.000059 |

Population analysis using the SCF density.

| Label | Frequencies | IR Inten | Dipole |
|-------|-------------|----------|--------|
| A     | 3477.1178   | 78.5344  | 0.6307 |
| A     | 3198.5485   | 13.0230  |        |
| A     | 3193.3281   | 14.7822  |        |
| A     | 3181.7185   | 9.5114   |        |
| A     | 3169.0278   | 0.6186   |        |
| A     | 3112.1139   | 27.2548  |        |
| A     | 3104.5940   | 36.7354  |        |
| A     | 3036.8360   | 33.9843  |        |
| A     | 3035.0158   | 9.7353   |        |
| A     | 3012.1984   | 28.7878  |        |

|   |           |         |
|---|-----------|---------|
| A | 2330.6449 | 23.5839 |
| A | 2206.4971 | 1.8649  |
| A | 1633.6204 | 3.6917  |
| A | 1592.6101 | 0.7741  |
| A | 1509.9941 | 13.3851 |
| A | 1505.8122 | 25.9828 |
| A | 1496.8180 | 7.4556  |
| A | 1476.3141 | 2.5286  |
| A | 1471.2600 | 10.7193 |
| A | 1414.4622 | 2.2776  |
| A | 1357.4108 | 37.7382 |
| A | 1311.9126 | 1.1379  |
| A | 1299.2078 | 0.3545  |
| A | 1288.2805 | 0.0786  |
| A | 1267.9259 | 0.0687  |
| A | 1217.7353 | 0.4494  |
| A | 1185.2698 | 0.1717  |
| A | 1124.9620 | 3.8707  |
| A | 1104.6392 | 0.3088  |
| A | 1087.4494 | 0.8764  |
| A | 1062.7045 | 2.5767  |
| A | 1022.0764 | 4.6399  |
| A | 995.4118  | 0.0016  |
| A | 965.7256  | 1.7279  |
| A | 908.1701  | 0.2728  |
| A | 888.4863  | 0.0177  |
| A | 788.9132  | 4.9079  |
| A | 788.2670  | 1.8108  |
| A | 771.8547  | 65.0769 |
| A | 746.9279  | 0.7322  |
| A | 690.1413  | 19.6781 |
| A | 679.4388  | 24.4739 |
| A | 630.0920  | 37.6272 |
| A | 607.8310  | 0.6992  |
| A | 567.6123  | 0.1456  |
| A | 549.2496  | 1.4270  |
| A | 529.2327  | 2.3447  |
| A | 525.0435  | 5.7809  |
| A | 433.2921  | 1.2631  |
| A | 400.9323  | 0.0037  |
| A | 366.6713  | 2.5844  |
| A | 360.7560  | 0.9204  |
| A | 281.1141  | 0.3372  |
| A | 205.0124  | 0.0412  |
| A | 188.7520  | 0.2248  |
| A | 140.0510  | 1.5412  |
| A | 133.6713  | 3.7774  |
| A | 79.5480   | 1.2802  |
| A | 55.8372   | 0.7316  |

A 33.8343 0.0240

3,4-benzobicyclo[3.3.0]octa-1,3,5-triene (**I**):

Processing: bbc33dien6plam6.log  
PG=CS

| Method | BasisSet    | Imaginary Freqs |
|--------|-------------|-----------------|
| RM06   | 6-31+G(d,p) | 0               |

HF Energy  
-462.9201070

| ZPE       | E298    | S298   | Strans | Srot   |
|-----------|---------|--------|--------|--------|
| 113.31488 | 118.786 | 91.703 | 41.007 | 30.159 |

Processing: bbc33dien6plam6.log  
22

|   |           |           |           |
|---|-----------|-----------|-----------|
| C | 0.000000  | 0.753074  | 0.000000  |
| C | 1.262272  | 0.100382  | 0.000000  |
| C | -0.089261 | 2.136863  | 0.000000  |
| C | 2.429694  | 0.856781  | 0.000000  |
| C | 1.089456  | 2.887237  | 0.000000  |
| C | 2.331664  | 2.250509  | 0.000000  |
| H | -1.059507 | 2.631789  | 0.000000  |
| H | 3.405234  | 0.373245  | 0.000000  |
| H | 1.039702  | 3.973689  | 0.000000  |
| H | 3.239509  | 2.850510  | 0.000000  |
| C | -0.995982 | -0.308916 | 0.000000  |
| C | 1.056130  | -1.353753 | 0.000000  |
| C | -2.324978 | -0.513396 | 0.000000  |
| C | -0.277546 | -1.582774 | 0.000000  |
| C | -1.266969 | -2.704958 | 0.000000  |
| C | -2.644141 | -1.984362 | 0.000000  |
| H | -1.154149 | -3.352750 | 0.878307  |
| H | -1.154149 | -3.352750 | -0.878307 |
| H | -3.250726 | -2.256433 | -0.875601 |
| H | -3.250726 | -2.256433 | 0.875601  |
| H | -3.096910 | 0.253291  | 0.000000  |
| H | 1.859705  | -2.084280 | 0.000000  |

Processing: bbc33dienm6x.log  
PG=CS

| Method | BasisSet     | Imaginary Freqs |
|--------|--------------|-----------------|
| RM062X | 6-311+G(d,p) | 0               |

HF Energy  
-463.1820392

| ZPE       | E298    | S298   | Strans | Srot   |
|-----------|---------|--------|--------|--------|
| 114.42531 | 119.887 | 91.970 | 41.007 | 30.161 |

Processing: bbc33dienm6x.log

22

|   |           |           |           |
|---|-----------|-----------|-----------|
| C | 0.000000  | 0.758311  | 0.000000  |
| C | 1.260170  | 0.107624  | 0.000000  |
| C | -0.088985 | 2.140139  | 0.000000  |
| C | 2.427145  | 0.860459  | 0.000000  |
| C | 1.089615  | 2.888069  | 0.000000  |
| C | 2.329860  | 2.252770  | 0.000000  |
| H | -1.053819 | 2.634851  | 0.000000  |
| H | 3.398516  | 0.378974  | 0.000000  |
| H | 1.040713  | 3.970179  | 0.000000  |
| H | 3.233859  | 2.850645  | 0.000000  |
| C | -1.000924 | -0.308677 | 0.000000  |
| C | 1.054073  | -1.353992 | 0.000000  |
| C | -2.323747 | -0.515202 | 0.000000  |
| C | -0.273310 | -1.584002 | 0.000000  |
| C | -1.262037 | -2.714473 | 0.000000  |
| C | -2.645186 | -1.993642 | 0.000000  |
| H | -1.145980 | -3.351546 | 0.878972  |
| H | -1.145980 | -3.351546 | -0.878972 |
| H | -3.243478 | -2.260407 | -0.876186 |
| H | -3.243478 | -2.260407 | 0.876186  |
| H | -3.094949 | 0.246223  | 0.000000  |
| H | 1.854547  | -2.081271 | 0.000000  |

Processing bbc33dien6be.log

PG=C01

| Method | BasisSet    | Imaginary Freqs |
|--------|-------------|-----------------|
| RB3LYP | 6-311G(d,p) | 0               |

HF Energy  
-463.3826571

Thermochemistry will use frequencies scaled by 0.9600

| ZPE       | E298    | S298   | Strans | Srot   |
|-----------|---------|--------|--------|--------|
| 108.75273 | 114.412 | 92.724 | 41.007 | 30.171 |

22

|   |           |           |           |
|---|-----------|-----------|-----------|
| C | -0.567143 | -0.502168 | -0.000103 |
| C | -0.915160 | 0.879598  | 0.000040  |

|   |           |           |           |
|---|-----------|-----------|-----------|
| C | -1.549207 | -1.482490 | -0.000142 |
| C | -2.255228 | 1.254307  | 0.000137  |
| C | -2.892545 | -1.093774 | -0.000049 |
| C | -3.237033 | 0.258668  | 0.000091  |
| H | -1.284822 | -2.534771 | -0.000243 |
| H | -2.539177 | 2.301439  | 0.000245  |
| H | -3.671715 | -1.847526 | -0.000082 |
| H | -4.284076 | 0.542096  | 0.000166  |
| C | 0.894224  | -0.546602 | -0.000115 |
| C | 0.317230  | 1.688028  | 0.000046  |
| C | 1.927058  | -1.406166 | 0.000057  |
| C | 1.371125  | 0.841790  | -0.000077 |
| C | 2.874872  | 0.849471  | -0.000290 |
| C | 3.249958  | -0.670294 | 0.000336  |
| H | 3.282535  | 1.360049  | 0.877031  |
| H | 3.282110  | 1.359123  | -0.878349 |
| H | 3.852429  | -0.942335 | -0.874370 |
| H | 3.851615  | -0.941790 | 0.875773  |
| H | 1.866715  | -2.488567 | 0.000126  |
| H | 0.335474  | 2.770078  | 0.000109  |

Population analysis using the SCF density.

| Label | Frequencies | IR Inten | Dipole |
|-------|-------------|----------|--------|
| A     | 3201.4504   | 13.2338  | 1.6520 |
| A     | 3185.7927   | 32.6254  |        |
| A     | 3184.8488   | 7.8692   |        |
| A     | 3172.3740   | 32.4783  |        |
| A     | 3162.4919   | 1.8219   |        |
| A     | 3155.6962   | 3.3375   |        |
| A     | 3067.8366   | 24.3457  |        |
| A     | 3039.3426   | 39.9026  |        |
| A     | 3032.8313   | 10.8392  |        |
| A     | 3014.5050   | 39.7123  |        |
| A     | 1694.6044   | 10.5321  |        |
| A     | 1647.7175   | 3.1855   |        |
| A     | 1640.7116   | 52.1757  |        |
| A     | 1610.5550   | 3.6596   |        |
| A     | 1495.5611   | 3.9991   |        |
| A     | 1489.3340   | 7.4859   |        |
| A     | 1473.3707   | 44.6000  |        |
| A     | 1468.2014   | 3.5381   |        |
| A     | 1381.0926   | 2.5277   |        |
| A     | 1355.5008   | 1.2790   |        |
| A     | 1328.4108   | 9.4422   |        |
| A     | 1318.2981   | 5.8102   |        |
| A     | 1279.0336   | 0.4868   |        |
| A     | 1246.8715   | 9.2555   |        |
| A     | 1229.8318   | 0.4442   |        |
| A     | 1207.8652   | 10.8216  |        |



|   |           |         |
|---|-----------|---------|
| A | 1190.7920 | 2.2989  |
| A | 1172.5795 | 5.8064  |
| A | 1163.4516 | 0.1065  |
| A | 1134.5519 | 2.1039  |
| A | 1111.7568 | 0.1584  |
| A | 1041.6686 | 3.1393  |
| A | 1020.3510 | 3.5078  |
| A | 992.7850  | 11.7374 |
| A | 983.3724  | 0.0517  |
| A | 960.2604  | 2.5995  |
| A | 944.3651  | 1.3121  |
| A | 901.4457  | 6.7868  |
| A | 889.7021  | 6.3091  |
| A | 886.5726  | 0.6078  |
| A | 845.3191  | 0.6391  |
| A | 840.0251  | 17.8098 |
| A | 825.8227  | 2.2287  |
| A | 786.2899  | 0.6286  |
| A | 766.1910  | 58.9140 |
| A | 757.7711  | 0.0122  |
| A | 726.5894  | 2.6237  |
| A | 683.3477  | 1.0544  |
| A | 676.3415  | 11.7566 |
| A | 590.5507  | 0.7815  |
| A | 568.0792  | 5.4897  |
| A | 518.9956  | 0.5547  |
| A | 453.8494  | 0.3445  |
| A | 436.7983  | 1.6897  |
| A | 326.1966  | 4.2708  |
| A | 311.5448  | 0.2094  |
| A | 243.1667  | 0.9230  |
| A | 198.0794  | 0.0132  |
| A | 122.3723  | 3.1756  |
| A | 88.3445   | 0.5480  |

Pyridine N-oxide:

Processing: pyro61pbe.log  
PG=C02V

| Method | BasisSet     | Imaginary Freqs |
|--------|--------------|-----------------|
| RB3LYP | 6-311+G(d,p) | 0               |

HF Energy  
-323.5400821

Thermochemistry will use frequencies scaled by 0.9600

| ZPE | E298 | S298 | Strans | Srot |
|-----|------|------|--------|------|
|-----|------|------|--------|------|

55.66165 58.976 72.390 39.566 25.353

12

|   |          |           |           |
|---|----------|-----------|-----------|
| C | 0.000000 | 1.192886  | -1.097905 |
| C | 0.000000 | 0.000000  | -1.818744 |
| C | 0.000000 | -1.192886 | -1.097905 |
| C | 0.000000 | -1.178914 | 0.283063  |
| N | 0.000000 | 0.000000  | 0.984084  |
| C | 0.000000 | 1.178914  | 0.283063  |
| H | 0.000000 | -2.058797 | 0.909205  |
| H | 0.000000 | 2.058797  | 0.909205  |
| H | 0.000000 | -2.151987 | -1.601225 |
| H | 0.000000 | 2.151987  | -1.601225 |
| H | 0.000000 | 0.000000  | -2.900661 |
| O | 0.000000 | 0.000000  | 2.260837  |

Population analysis using the SCF density.

| Label | Frequencies | IR Inten | Dipole |
|-------|-------------|----------|--------|
| A1    | 3239.6672   | 0.1870   | 4.4175 |
| A1    | 3210.1275   | 3.0242   |        |
| A1    | 3187.1790   | 0.2051   |        |
| A1    | 1655.1333   | 43.5325  |        |
| A1    | 1491.6973   | 116.1350 |        |
| A1    | 1322.5110   | 206.2756 |        |
| A1    | 1193.9764   | 32.3934  |        |
| A1    | 1058.2901   | 0.0388   |        |
| A1    | 1025.9566   | 43.3188  |        |
| A1    | 857.1152    | 14.4299  |        |
| A1    | 553.7679    | 6.6849   |        |
| A2    | 965.0951    | 0.0000   |        |
| A2    | 828.2027    | 0.0000   |        |
| A2    | 421.9917    | 0.0000   |        |
| B1    | 978.6391    | 0.1293   |        |
| B1    | 886.4334    | 4.2720   |        |
| B1    | 764.6996    | 67.4166  |        |
| B1    | 677.8863    | 26.7691  |        |
| B1    | 515.0461    | 9.2082   |        |
| B1    | 209.1553    | 3.8839   |        |
| B2    | 3238.1464   | 0.4007   |        |
| B2    | 3193.3032   | 6.4030   |        |
| B2    | 1578.9243   | 4.1288   |        |
| B2    | 1506.0798   | 4.4558   |        |
| B2    | 1355.0104   | 0.1281   |        |
| B2    | 1250.9342   | 2.8214   |        |
| B2    | 1171.2891   | 0.5615   |        |
| B2    | 1091.0303   | 3.9437   |        |
| B2    | 649.5834    | 0.5832   |        |
| B2    | 481.3907    | 5.3571   |        |

Pyridine N-oxide, protonated:

Processing: pyroh61pbe.log  
PG=CS

Method BasisSet Imaginary Freqs  
RB3LYP 6-311+G(d,p) 0

HF Energy  
-323.8997106

Thermochemistry will use frequencies scaled by 0.9600

| ZPE      | E298   | S298   | Strans | Srot   |
|----------|--------|--------|--------|--------|
| 63.17266 | 66.902 | 76.510 | 39.598 | 26.830 |

13

|   |           |           |           |
|---|-----------|-----------|-----------|
| C | -0.004075 | 0.231793  | 1.190248  |
| C | -0.004075 | -1.150136 | 1.207160  |
| C | -0.001786 | -1.849823 | 0.000000  |
| C | -0.004075 | -1.150136 | -1.207160 |
| C | -0.004075 | 0.231793  | -1.190248 |
| N | 0.018783  | 0.867360  | 0.000000  |
| O | -0.092430 | 2.246369  | 0.000000  |
| H | -0.027869 | 0.865282  | -2.066586 |
| H | -0.027869 | 0.865282  | 2.066586  |
| H | -0.016150 | -1.662643 | -2.160076 |
| H | -0.016150 | -1.662643 | 2.160076  |
| H | -0.007741 | -2.933093 | 0.000000  |
| H | 0.812247  | 2.604391  | 0.000000  |

Population analysis using the SCF density.

| Label | Frequencies | IR Inten | Dipole |
|-------|-------------|----------|--------|
| A'    | 3703.9378   | 158.2550 | 1.6864 |
| A'    | 3235.2690   | 4.9850   |        |
| A'    | 3220.2003   | 16.0761  |        |
| A'    | 3204.1604   | 0.1416   |        |
| A'    | 1648.5041   | 17.7162  |        |
| A'    | 1514.2928   | 14.2219  |        |
| A'    | 1396.6266   | 78.6832  |        |
| A'    | 1215.3963   | 10.2599  |        |
| A'    | 1187.4181   | 14.8931  |        |
| A'    | 1071.0190   | 2.5652   |        |
| A'    | 1040.2712   | 0.0530   |        |
| A'    | 1038.8728   | 0.2844   |        |
| A'    | 962.2152    | 1.4770   |        |
| A'    | 822.8124    | 11.4306  |        |
| A'    | 780.3414    | 64.7064  |        |
| A'    | 667.6220    | 33.9253  |        |

|    |           |          |
|----|-----------|----------|
| A' | 542.8110  | 0.8681   |
| A' | 461.2652  | 13.6981  |
| A' | 221.1914  | 4.3495   |
| A" | 3233.1071 | 38.9916  |
| A" | 3217.6670 | 1.8618   |
| A" | 1613.1195 | 0.6358   |
| A" | 1510.1242 | 41.2161  |
| A" | 1366.9282 | 1.1734   |
| A" | 1313.4309 | 19.5552  |
| A" | 1194.3692 | 2.4896   |
| A" | 1112.2727 | 3.5782   |
| A" | 1000.8305 | 0.0342   |
| A" | 858.2024  | 0.3555   |
| A" | 651.6922  | 0.0426   |
| A" | 436.4789  | 0.2474   |
| A" | 413.4771  | 2.3776   |
| A" | 175.2873  | 123.9327 |

**B:**

Processing: pauetbendiy6plam6.log  
PG=C01

| Method | BasisSet                | Imaginary Freqs |
|--------|-------------------------|-----------------|
| RM06   | 6-31+G(d,p)/LANL2DZ(Au) | 0               |

HF Energy  
-941.2018467

| ZPE       | E298    | S298    | Strans | Srot   |
|-----------|---------|---------|--------|--------|
| 127.74562 | 138.460 | 144.097 | 43.737 | 34.099 |

27

|    |           |           |           |
|----|-----------|-----------|-----------|
| C  | -0.289911 | -0.397913 | -1.841439 |
| Au | -1.667422 | -0.080912 | -0.237369 |
| P  | -3.310619 | 0.324811  | 1.403286  |
| C  | 0.694897  | -0.865601 | -1.225851 |
| C  | 1.749014  | -1.369597 | -0.461265 |
| C  | 2.619212  | -0.473406 | 0.229368  |
| C  | 2.411608  | 0.927774  | 0.188434  |
| C  | 2.249524  | 2.131675  | 0.157004  |
| C  | 2.118021  | 3.579927  | 0.110253  |
| H  | -4.521902 | 0.858610  | 0.934419  |
| H  | -3.758480 | -0.784511 | 2.139029  |
| H  | -2.982174 | 1.228816  | 2.426797  |
| H  | -0.585022 | -0.103716 | -2.838975 |
| C  | 1.960654  | -2.765137 | -0.400440 |
| C  | 3.681395  | -1.020941 | 0.957683  |

|   |          |           |           |
|---|----------|-----------|-----------|
| C | 3.445970 | 4.273067  | -0.201818 |
| H | 1.361680 | 3.849281  | -0.639359 |
| H | 1.729229 | 3.930256  | 1.076747  |
| H | 3.309503 | 5.358083  | -0.226733 |
| H | 4.197548 | 4.039769  | 0.558611  |
| H | 3.835797 | 3.954583  | -1.173442 |
| C | 3.023343 | -3.273626 | 0.319676  |
| H | 1.281584 | -3.422721 | -0.937658 |
| H | 3.194526 | -4.345222 | 0.360483  |
| C | 3.878914 | -2.395766 | 0.996551  |
| H | 4.351811 | -0.351308 | 1.489299  |
| H | 4.715709 | -2.794804 | 1.564691  |

C:

Processing: sauetbendiyn6plam6.log

PG=C01

| Method | BasisSet                | Imaginary Freqs |
|--------|-------------------------|-----------------|
| RM06   | 6-31+G(d,p)/LANL2DZ(Au) | 0               |

HF Energy

-940.8176680

| ZPE       | E298    | S298    | Strans | Srot   |
|-----------|---------|---------|--------|--------|
| 121.76584 | 131.972 | 137.231 | 43.729 | 34.316 |

26

|    |           |           |           |
|----|-----------|-----------|-----------|
| C  | -0.094121 | -0.659876 | -0.000994 |
| C  | -1.311430 | -0.792221 | 0.000256  |
| C  | -2.725999 | -0.947083 | 0.001668  |
| C  | -3.581010 | 0.183949  | -0.005854 |
| C  | -3.026356 | 1.495544  | -0.015971 |
| C  | -2.524872 | 2.600047  | -0.024645 |
| C  | -1.821242 | 3.874876  | -0.037631 |
| Au | 1.887697  | -0.409902 | -0.001844 |
| P  | 4.223653  | -0.102139 | -0.002614 |
| C  | -3.301075 | -2.226778 | 0.010670  |
| C  | -4.969714 | -0.003263 | -0.004062 |
| C  | -0.308807 | 3.677996  | 0.067510  |
| H  | -2.179191 | 4.504825  | 0.789287  |
| H  | -2.067102 | 4.421393  | -0.959493 |
| H  | 4.977687  | -0.684538 | -1.040873 |
| H  | 4.965609  | -0.566522 | 1.101718  |
| H  | 4.724498  | 1.213153  | -0.072155 |
| C  | -4.679393 | -2.394038 | 0.012388  |
| H  | -2.638700 | -3.089479 | 0.016344  |
| H  | -5.101990 | -3.396301 | 0.019463  |
| C  | -5.517855 | -1.279066 | 0.005049  |

H -5.611721 0.874960 -0.010018  
H -6.598126 -1.404959 0.006321  
H 0.214110 4.640742 0.039162  
H -0.051645 3.166316 1.001531  
H 0.054954 3.054199 -0.756740

WARNING: Geometry optimization converged in opt job, but not in freq job

AuPH<sub>3</sub>:

Processing: aup6plam6.log  
PG=C03V

| Method | BasisSet                | Imaginary Freqs |
|--------|-------------------------|-----------------|
| RM06   | 6-31+G(d,p)/LANL2DZ(Au) | 0               |

HF Energy  
-478.2969361

| ZPE      | E298   | S298   | Strans | Srot   |
|----------|--------|--------|--------|--------|
| 17.34994 | 19.705 | 66.176 | 42.213 | 21.152 |

5  
P 0.000000 0.000000 -1.864018  
Au 0.000000 0.000000 0.446233  
H 0.000000 1.281584 -2.430711  
H 1.109884 -0.640792 -2.430711  
H -1.109884 -0.640792 -2.430711

D:

Processing: etbendiynau2p2-sp6plam6.log  
PG=C01

| Method | BasisSet                | Imaginary Freqs |
|--------|-------------------------|-----------------|
| RM06   | 6-31+G(d,p)/LANL2DZ(Au) | 0               |

HF Energy  
-1419.2066756

| ZPE       | E298    | S298    | Strans | Srot   |
|-----------|---------|---------|--------|--------|
| 139.14482 | 153.038 | 174.136 | 45.133 | 36.693 |

31  
C 2.365787 4.140449 0.070798  
C 2.494766 2.766237 -0.066921

```

C  1.361565  1.948692 -0.085802
C  0.064258  2.511002  0.037873
C -0.038637  3.902299  0.178297
C  1.094814  4.703904  0.194391
C -1.087658  1.681778  0.018854
C -2.081018  0.963360  0.000888
Au -3.775961 -0.112285 -0.007068
P -5.813358 -1.313389 -0.014163
C  1.425989  0.519635 -0.224073
C  0.860116 -0.584452 -0.356193
C  0.154200 -1.847456 -0.483362
C -0.022632 -2.584181  0.842214
Au  3.280295 -0.647736 -0.060664
P  5.440197 -1.567945  0.156035
H -5.839803 -2.585175 -0.615692
H -6.906341 -0.711262 -0.663441
H -6.398730 -1.616472  1.228673
H  0.638900 -2.476489 -1.242378
H -0.825425 -1.568415 -0.904041
H  5.916525 -2.331121 -0.922319
H  6.479762 -0.639157  0.325513
H  5.657574 -2.435464  1.238799
H -0.604494 -3.498352  0.692640
H  0.945535 -2.864152  1.273408
H -0.548694 -1.950791  1.563724
H -1.028554  4.340694  0.273103
H  0.988019  5.780213  0.302784
H  3.482028  2.317659 -0.170712
H  3.249477  4.772341  0.080897

```

WARNING: Geometry optimization converged in opt job, but not in freq job

**TS1:**

Processing: etbcpau2p2-sprcts6plam6.log  
PG=C01

| Method | BasisSet                | Imaginary Freqs |
|--------|-------------------------|-----------------|
| RM06   | 6-31+G(d,p)/LANL2DZ(Au) | 1               |

HF Energy  
-1419.1996758

| ZPE       | E298    | S298    | Strans | Srot   |
|-----------|---------|---------|--------|--------|
| 139.13454 | 152.264 | 162.863 | 45.133 | 36.578 |

```

31
C -2.463905  4.151631  0.099391

```

C -2.618766 2.770261 0.035913  
 C -1.492446 1.951961 0.013147  
 C -0.204571 2.532200 0.054175  
 C -0.054758 3.918436 0.116091  
 C -1.190272 4.721350 0.138887  
 C -1.467600 0.502872 -0.049264  
 Au -3.201583 -0.679829 -0.070076  
 P -5.214579 -1.928555 -0.081472  
 C 0.858285 1.592152 0.022971  
 C 1.878833 0.890926 -0.005154  
 Au 3.614582 -0.131158 -0.059911  
 P 5.697371 -1.248920 -0.128944  
 C -0.363194 -0.186473 -0.071646  
 C 0.246107 -1.524194 -0.051601  
 C 0.678365 -1.992087 1.334351  
 H 6.051410 -1.883466 -1.332176  
 H 5.908217 -2.290860 0.790625  
 H 6.838335 -0.460754 0.099680  
 H -0.536707 -2.191592 -0.444725  
 H 1.068690 -1.580596 -0.774223  
 H -6.406924 -1.200283 -0.237132  
 H -5.517206 -2.682977 1.065692  
 H -5.370818 -2.901866 -1.084047  
 H 1.084688 -3.007666 1.286319  
 H 1.445971 -1.330645 1.752124  
 H -0.172512 -1.992390 2.024938  
 H 0.938635 4.357618 0.146214  
 H -1.082705 5.801657 0.187552  
 H -3.612570 2.327558 0.003128  
 H -3.341796 4.792105 0.117673

**TS1a:**

Processing: etbcgau2p2-sprcts-a6plam6.log  
 PG=C01

| Method | BasisSet                | Imaginary Freqs |
|--------|-------------------------|-----------------|
| RM06   | 6-31+G(d,p)/LANL2DZ(Au) | 1               |

HF Energy  
 -1419.2017914

| ZPE       | E298    | S298    | Strans | Srot   |
|-----------|---------|---------|--------|--------|
| 139.46338 | 152.295 | 158.746 | 45.133 | 36.453 |

ccl00:~/aue/ark/pj/au> gtg etbcgau2p2-sprcts-a6plam6.log  
 Processing: etbcgau2p2-sprcts-a6plam6.log  
 31



C -2.606902 4.134698 0.049880  
 C -2.696242 2.749203 -0.006896  
 C -1.526009 1.989308 0.008242  
 C -0.286867 2.657641 0.084778  
 C -0.186752 4.049540 0.136470  
 C -1.365525 4.781132 0.120240  
 C -1.366154 0.548326 -0.041680  
 Au -3.007134 -0.725904 -0.074377  
 P -4.931227 -2.131288 -0.110822  
 C 0.742638 1.695433 0.070885  
 C 1.666290 0.859912 0.014744  
 Au 3.436497 -0.141834 -0.067774  
 P 5.554359 -1.172987 -0.168538  
 C -0.102084 0.072207 -0.026118  
 C 0.318901 -1.369854 0.051449  
 C 0.676592 -1.834822 1.458620  
 H 6.122247 -1.334995 -1.443145  
 H 5.659824 -2.476077 0.345726  
 H 6.596198 -0.524554 0.515008  
 H -0.557632 -1.931653 -0.301286  
 H 1.124075 -1.595556 -0.659424  
 H -6.057825 -1.708984 0.618367  
 H -4.797850 -3.443106 0.380380  
 H -5.527758 -2.394547 -1.357657  
 H 0.915044 -2.903866 1.462790  
 H 1.540616 -1.293143 1.864541  
 H -0.165206 -1.667625 2.140739  
 H 0.780536 4.540802 0.190928  
 H -1.325685 5.866013 0.163568  
 H -3.664709 2.255365 -0.063132  
 H -3.515818 4.731000 0.039253

**E:**

Processing: etmebcpau2p2-sp6plam6.log  
PG=C01

| Method | BasisSet                | Imaginary Freqs |
|--------|-------------------------|-----------------|
| RM06   | 6-31+G(d,p)/LANL2DZ(Au) | 0               |

HF Energy  
-1419.2134688

| ZPE       | E298    | S298    | Strans | Srot   |
|-----------|---------|---------|--------|--------|
| 139.74491 | 152.882 | 164.159 | 45.133 | 36.601 |

31  
C -1.774851 4.207109 0.157690

C -2.280476 2.904052 0.097103  
 C -1.393909 1.839975 0.033873  
 C -0.007990 2.103724 0.032643  
 C 0.505352 3.386630 0.093291  
 C -0.403515 4.448486 0.155078  
 C 0.666195 0.791668 -0.034648  
 C -0.449418 -0.265163 -0.086081  
 C -1.628705 0.396302 -0.040157  
 Au -3.481335 -0.500247 -0.060868  
 P -5.651971 -1.498288 -0.079808  
 C -0.142446 -1.723045 -0.139326  
 C 0.418276 -2.273807 1.169059  
 C 1.906334 0.445543 -0.033740  
 Au 3.783349 -0.213368 -0.055636  
 P 6.028143 -1.010935 -0.084284  
 H 6.468058 -1.718042 1.046538  
 H 6.369671 -1.896050 -1.119810  
 H 7.028730 -0.033222 -0.210577  
 H -1.076686 -2.243903 -0.387065  
 H 0.553813 -1.929865 -0.967185  
 H -5.735223 -2.901417 -0.014069  
 H -6.539685 -1.152231 0.955616  
 H -6.472663 -1.256924 -1.197158  
 H 1.576247 3.575958 0.091394  
 H -0.033363 5.469151 0.200387  
 H -3.353963 2.725001 0.100454  
 H -2.464055 5.046445 0.206972  
 H 0.618029 -3.347759 1.092128  
 H 1.359636 -1.779300 1.448125  
 H -0.289294 -2.112793 1.990682

**J:**

Processing: etbchau2p2-sprcprod6plam6.log  
 PG=C01

| Method | BasisSet                | Imaginary Freqs |
|--------|-------------------------|-----------------|
| RM06   | 6-31+G(d,p)/LANL2DZ(Au) | 0               |

HF Energy  
 -1419.2230174

| ZPE       | E298    | S298    | Strans | Srot   |
|-----------|---------|---------|--------|--------|
| 139.66987 | 152.741 | 161.571 | 45.133 | 36.293 |

31

C 0.199163 -1.717764 -0.166918  
 C 0.055057 -0.217842 -0.119816

|    |           |           |           |
|----|-----------|-----------|-----------|
| C  | -1.149754 | 0.457542  | -0.064537 |
| Au | -2.928569 | -0.632558 | -0.065487 |
| P  | -4.962924 | -1.878572 | -0.057972 |
| C  | -1.194133 | 1.885811  | 0.017690  |
| C  | 0.025105  | 2.714819  | 0.052295  |
| C  | 1.019460  | 1.792912  | -0.002170 |
| C  | 1.323900  | 0.549942  | -0.074288 |
| Au | 3.271194  | -0.180451 | -0.060792 |
| P  | 5.490568  | -0.995346 | -0.047872 |
| H  | 5.917325  | -1.703654 | -1.184024 |
| H  | 5.836135  | -1.894526 | 0.975146  |
| H  | 6.514819  | -0.041217 | 0.075056  |
| C  | -0.016218 | 4.118998  | 0.123485  |
| C  | -2.396384 | 2.635635  | 0.067282  |
| H  | -0.735205 | -2.146818 | -0.552635 |
| H  | 0.985895  | -1.982243 | -0.887960 |
| C  | 0.514509  | -2.311384 | 1.200875  |
| H  | -6.167672 | -1.166402 | -0.205205 |
| H  | -5.266148 | -2.636586 | 1.088298  |
| H  | -5.136105 | -2.858922 | -1.052671 |
| H  | 0.627601  | -3.399266 | 1.144867  |
| H  | 1.447423  | -1.897431 | 1.609696  |
| H  | -0.285090 | -2.083875 | 1.916382  |
| C  | -1.231797 | 4.755753  | 0.167477  |
| H  | 0.915719  | 4.675231  | 0.143280  |
| H  | -1.270786 | 5.839974  | 0.223362  |
| C  | -2.424769 | 4.007998  | 0.140336  |
| H  | -3.329431 | 2.075458  | 0.044118  |
| H  | -3.381311 | 4.522170  | 0.175756  |
| H  | -0.285090 | -2.083875 | 1.916382  |
| C  | -1.231797 | 4.755753  | 0.167477  |
| H  | 0.915719  | 4.675231  | 0.143280  |
| H  | -1.270786 | 5.839974  | 0.223362  |
| C  | -2.424769 | 4.007998  | 0.140336  |
| H  | -3.329431 | 2.075458  | 0.044118  |
| H  | -3.381311 | 4.522170  | 0.175756  |

**K:**

Processing: etbchau2p2-sprcprod6plam6.log

31

|    |           |           |           |
|----|-----------|-----------|-----------|
| C  | 0.199163  | -1.717764 | -0.166918 |
| C  | 0.055057  | -0.217842 | -0.119816 |
| C  | -1.149754 | 0.457542  | -0.064537 |
| Au | -2.928569 | -0.632558 | -0.065487 |
| P  | -4.962924 | -1.878572 | -0.057972 |
| C  | -1.194133 | 1.885811  | 0.017690  |
| C  | 0.025105  | 2.714819  | 0.052295  |

|    |           |           |           |
|----|-----------|-----------|-----------|
| C  | 1.019460  | 1.792912  | -0.002170 |
| C  | 1.323900  | 0.549942  | -0.074288 |
| Au | 3.271194  | -0.180451 | -0.060792 |
| P  | 5.490568  | -0.995346 | -0.047872 |
| H  | 5.917325  | -1.703654 | -1.184024 |
| H  | 5.836135  | -1.894526 | 0.975146  |
| H  | 6.514819  | -0.041217 | 0.075056  |
| C  | -0.016218 | 4.118998  | 0.123485  |
| C  | -2.396384 | 2.635635  | 0.067282  |
| H  | -0.735205 | -2.146818 | -0.552635 |
| H  | 0.985895  | -1.982243 | -0.887960 |
| C  | 0.514509  | -2.311384 | 1.200875  |
| H  | -6.167672 | -1.166402 | -0.205205 |
| H  | -5.266148 | -2.636586 | 1.088298  |
| H  | -5.136105 | -2.858922 | -1.052671 |
| H  | 0.627601  | -3.399266 | 1.144867  |
| H  | 1.447423  | -1.897431 | 1.609696  |
| H  | -0.285090 | -2.083875 | 1.916382  |
| C  | -1.231797 | 4.755753  | 0.167477  |
| H  | 0.915719  | 4.675231  | 0.143280  |
| H  | -1.270786 | 5.839974  | 0.223362  |
| C  | -2.424769 | 4.007998  | 0.140336  |
| H  | -3.329431 | 2.075458  | 0.044118  |
| H  | -3.381311 | 4.522170  | 0.175756  |

Processing: etbchau2p2-sprcprod-a6plam6.log  
PG=C01

| Method | BasisSet                | Imaginary Freqs |
|--------|-------------------------|-----------------|
| RM06   | 6-31+G(d,p)/LANL2DZ(Au) | 0               |

HF Energy  
-1419.2337626

| ZPE       | E298    | S298    | Strans | Srot   |
|-----------|---------|---------|--------|--------|
| 140.05902 | 153.137 | 162.310 | 45.133 | 36.212 |

31

|   |           |           |           |
|---|-----------|-----------|-----------|
| C | -0.729443 | 3.681368  | 0.248644  |
| C | -1.358860 | 2.466758  | 0.123655  |
| C | -0.622715 | 1.255559  | 0.038740  |
| C | 0.812427  | 1.356301  | 0.087831  |
| C | 1.438768  | 2.614533  | 0.214323  |
| C | 0.677753  | 3.756606  | 0.294624  |
| C | 1.543373  | 0.110446  | -0.012688 |
| C | 0.668295  | -0.842389 | -0.106678 |
| C | -0.618706 | -1.250714 | -0.193196 |
| C | -1.283153 | -0.008114 | -0.089501 |
| C | -1.214216 | -2.619984 | -0.265074 |

```

C -1.385701 -3.239603 1.119125
Au -3.381395 -0.123958 -0.081996
P -5.758801 -0.204971 -0.071683
Au 3.591066 -0.223094 -0.042670
P 5.928391 -0.591148 -0.077251
H 6.628954 -0.393036 1.124976
H 6.686814 0.196974 -0.959798
H 6.365534 -1.879502 -0.429954
H -2.184637 -2.536472 -0.772741
H -0.580969 -3.257284 -0.894341
H -6.440592 1.025050 -0.074626
H -6.387635 -0.841091 1.013857
H -6.394624 -0.850121 -1.147733
H -1.827861 -4.238006 1.044576
H -0.423205 -3.333415 1.634609
H -2.039476 -2.620285 1.745065
H 2.525173 2.662535 0.248127
H 1.162873 4.724412 0.393886
H -2.446400 2.422218 0.086545
H -1.318752 4.592360 0.311350

```

WARNING: Geometry optimization converged in opt job, but not in freq job

**TS2:**

Processing: etmebcpau2p2-spts6plam6.log  
PG=C01

| Method | BasisSet                | Imaginary Freqs |
|--------|-------------------------|-----------------|
| RM06   | 6-31+G(d,p)/LANL2DZ(Au) | 1               |

HF Energy  
-1419.2017431

| ZPE       | E298    | S298    | Strans | Srot   |
|-----------|---------|---------|--------|--------|
| 138.79445 | 151.022 | 154.664 | 45.133 | 36.371 |

31

```

C -0.842834 3.882211 0.014892
C -1.666557 2.746691 0.021967
C -1.081861 1.497232 -0.077826
C 0.325334 1.391090 -0.184390
C 1.140615 2.508100 -0.191771
C 0.539862 3.769401 -0.090408
C -1.697285 0.146644 -0.099113
C -0.672692 -0.732146 -0.233359
C 0.617638 -0.038913 -0.277469
Au -3.701882 -0.242733 0.035799

```

|    |           |           |           |
|----|-----------|-----------|-----------|
| P  | -6.053986 | -0.673176 | 0.185892  |
| C  | -0.540107 | -2.219845 | -0.327337 |
| C  | 0.880918  | -2.545485 | 0.047218  |
| C  | 1.777458  | -0.720418 | -0.332805 |
| Au | 3.773543  | -0.383288 | -0.017330 |
| P  | 6.070013  | 0.092826  | 0.354536  |
| H  | 6.368674  | 1.113123  | 1.273892  |
| H  | 6.868616  | -0.951532 | 0.852512  |
| H  | 6.833136  | 0.503448  | -0.752287 |
| H  | -6.607517 | -1.639806 | -0.674536 |
| H  | -6.568911 | -1.123630 | 1.416025  |
| H  | -6.929887 | 0.399993  | -0.063229 |
| H  | 1.334845  | -3.442132 | -0.389967 |
| H  | 1.142118  | -2.453106 | 1.100795  |
| H  | 1.622473  | -1.825670 | -0.793942 |
| H  | -0.761741 | -2.589341 | -1.338457 |
| H  | -1.225091 | -2.733245 | 0.361440  |
| H  | 2.222714  | 2.415056  | -0.279168 |
| H  | 1.156262  | 4.664427  | -0.094841 |
| H  | -2.747456 | 2.846970  | 0.105273  |
| H  | -1.292789 | 4.869024  | 0.093432  |

**F:**

Processing: etmebcpau2p2-spprod6plam6.log  
PG=C01

| Method | BasisSet                | Imaginary Freqs |
|--------|-------------------------|-----------------|
| RM06   | 6-31+G(d,p)/LANL2DZ(Au) | 0               |

HF Energy  
-1419.2871509

| ZPE       | E298    | S298    | Strans | Srot   |
|-----------|---------|---------|--------|--------|
| 141.90342 | 154.163 | 156.180 | 45.133 | 36.017 |

31

|   |           |           |           |
|---|-----------|-----------|-----------|
| C | -1.947508 | -0.228098 | 1.943812  |
| C | -0.993535 | 0.452031  | 1.188175  |
| C | 0.153689  | -0.401200 | 0.908967  |
| C | -0.119006 | -1.774692 | 1.444534  |
| C | -1.344377 | -1.563001 | 2.370945  |
| C | -0.696207 | 1.789200  | 0.680525  |
| C | 0.618919  | 1.699816  | 0.157546  |
| C | 1.154200  | 0.317975  | 0.332956  |
| C | -1.411566 | 2.972546  | 0.670048  |
| C | -0.804797 | 4.108416  | 0.115495  |
| C | 0.483170  | 4.030173  | -0.401950 |

C 1.209512 2.826849 -0.380889  
 Au 3.048158 -0.296587 -0.131304  
 P 5.276270 -1.016375 -0.644854  
 Au -2.937265 -0.446779 -0.060470  
 P -4.239484 -0.832048 -1.996597  
 H -4.831096 -2.100416 -2.116062  
 H -5.348133 0.009188 -2.187013  
 H -3.585178 -0.713854 -3.234334  
 H 6.199463 -0.044037 -1.072879  
 H 6.021841 -1.620328 0.384844  
 H 5.448231 -1.975545 -1.660655  
 H -1.022561 -1.460323 3.417773  
 H -2.056206 -2.394993 2.348244  
 H -2.723321 0.266556 2.531012  
 H 0.735208 -2.210464 1.974115  
 H -0.370801 -2.470820 0.629155  
 H -2.418437 3.027117 1.083400  
 H -1.340380 5.053597 0.095727  
 H 2.222861 2.785629 -0.776712  
 H 0.941185 4.920840 -0.825647

**G:**

Processing: saupetmeb33dien6plam6.log  
 PG=C01

| Method | BasisSet                | Imaginary Freqs |
|--------|-------------------------|-----------------|
| RM06   | 6-31+G(d,p)/LANL2DZ(Au) | 0               |

HF Energy  
 -940.8967129

| ZPE       | E298    | S298    | Strans | Srot   |
|-----------|---------|---------|--------|--------|
| 123.69203 | 132.558 | 124.372 | 43.729 | 33.509 |

26

C -1.356354 -2.304627 0.000420  
 C -1.539236 -0.925620 0.000255  
 C -2.861590 -0.401126 -0.000385  
 C -3.967643 -1.236940 -0.000870  
 C -3.768066 -2.620425 -0.000717  
 C -2.473981 -3.143380 -0.000072  
 C -0.550918 0.173687 0.000613  
 C -1.273711 1.323641 0.000317  
 C -2.709352 1.046711 -0.000378  
 C -1.063851 2.805916 0.000291  
 C -2.505366 3.387728 -0.000616  
 C -3.419045 2.188646 -0.000919

|    |           |           |           |
|----|-----------|-----------|-----------|
| Au | 1.475022  | -0.029153 | 0.000787  |
| P  | 3.862667  | -0.265904 | -0.002133 |
| H  | 4.408849  | -1.561458 | -0.116480 |
| H  | 4.616034  | 0.367864  | -1.012953 |
| H  | 4.603514  | 0.174301  | 1.115171  |
| H  | -2.691310 | 4.026250  | -0.876619 |
| H  | -2.692288 | 4.026594  | 0.874926  |
| H  | -4.503660 | 2.278580  | -0.001578 |
| H  | -0.494429 | 3.137928  | -0.878285 |
| H  | -0.495483 | 3.138093  | 0.879485  |
| H  | -4.975884 | -0.823781 | -0.001374 |
| H  | -4.623609 | -3.292339 | -0.001099 |
| H  | -0.349663 | -2.722645 | 0.000930  |
| H  | -2.334128 | -4.222973 | 0.000055  |

**H:**

Processing: paupetmeb33dien6plam6.log  
PG=C01

| Method | BasisSet                | Imaginary Freqs |
|--------|-------------------------|-----------------|
| RM06   | 6-31+G(d,p)/LANL2DZ(Au) | 0               |

HF Energy  
-941.2933387

| ZPE       | E298    | S298    | Strans | Srot   |
|-----------|---------|---------|--------|--------|
| 131.39304 | 140.324 | 124.956 | 43.737 | 33.007 |

27

|    |           |           |           |
|----|-----------|-----------|-----------|
| C  | -3.791946 | -0.588578 | -1.027315 |
| C  | -2.699302 | 0.200662  | -0.713572 |
| C  | -1.926132 | -0.091439 | 0.438141  |
| C  | -2.232384 | -1.158455 | 1.267546  |
| C  | -3.336543 | -1.953699 | 0.941249  |
| C  | -4.099031 | -1.670283 | -0.189112 |
| C  | -2.156966 | 1.404992  | -1.373955 |
| C  | -1.079213 | 1.825929  | -0.679967 |
| C  | -0.891179 | 0.940825  | 0.481732  |
| C  | -0.066707 | 2.928013  | -0.629655 |
| C  | 0.519453  | 2.816869  | 0.802468  |
| C  | 0.088931  | 1.455937  | 1.316843  |
| Au | 1.193337  | -0.180592 | 0.120081  |
| P  | 2.753033  | -1.700306 | -0.788450 |
| H  | -2.597518 | 1.865495  | -2.252765 |
| H  | 3.438304  | -1.280534 | -1.939561 |
| H  | 3.809028  | -2.072500 | 0.058405  |
| H  | 2.246920  | -2.947471 | -1.188044 |



|   |           |           |           |
|---|-----------|-----------|-----------|
| H | 0.073398  | 3.573289  | 1.464862  |
| H | 1.601889  | 2.978723  | 0.845043  |
| H | 0.261966  | 1.137142  | 2.344996  |
| H | -0.493754 | 3.916287  | -0.826240 |
| H | 0.720613  | 2.775187  | -1.382202 |
| H | -1.636941 | -1.372689 | 2.154440  |
| H | -3.604408 | -2.793027 | 1.576927  |
| H | -4.407207 | -0.375413 | -1.898364 |
| H | -4.955309 | -2.297763 | -0.423571 |

**Ha:**

Processing: paupetmeh33dien-a6plam6.log  
PG=C01

| Method | BasisSet                | Imaginary Freqs |
|--------|-------------------------|-----------------|
| RM06   | 6-31+G(d,p)/LANL2DZ(Au) | 0               |

HF Energy  
-941.3017909

| ZPE       | E298    | S298    | Strans | Srot   |
|-----------|---------|---------|--------|--------|
| 131.39754 | 140.338 | 126.048 | 43.737 | 33.080 |

27

|    |           |           |           |
|----|-----------|-----------|-----------|
| C  | 1.957195  | -2.029961 | -1.028908 |
| C  | 1.642244  | -0.713278 | -0.714158 |
| C  | 2.279910  | -0.059925 | 0.369669  |
| C  | 3.222039  | -0.726739 | 1.144597  |
| C  | 3.532811  | -2.046925 | 0.823172  |
| C  | 2.912074  | -2.686977 | -0.252576 |
| C  | 0.668906  | 0.217957  | -1.349890 |
| C  | 0.804570  | 1.443769  | -0.680458 |
| C  | 1.762789  | 1.299642  | 0.398971  |
| C  | 0.395920  | 2.870465  | -0.814936 |
| C  | 1.046455  | 3.544851  | 0.415387  |
| C  | 1.924463  | 2.493952  | 1.016545  |
| Au | -1.173140 | -0.174142 | -0.166368 |
| P  | -3.125881 | -0.871522 | 0.951864  |
| H  | 0.308959  | 0.105951  | -2.373247 |
| H  | -2.947009 | -1.678376 | 2.087503  |
| H  | -3.969612 | 0.134614  | 1.450516  |
| H  | -4.024809 | -1.641650 | 0.196069  |
| H  | 0.298633  | 3.888555  | 1.144856  |
| H  | 1.623765  | 4.439196  | 0.147744  |
| H  | 2.612531  | 2.702348  | 1.832777  |
| H  | -0.687762 | 3.018044  | -0.871012 |
| H  | 0.807031  | 3.282666  | -1.746958 |

|   |          |           |           |
|---|----------|-----------|-----------|
| H | 3.716555 | -0.228935 | 1.976171  |
| H | 4.272922 | -2.583480 | 1.410816  |
| H | 1.479112 | -2.536293 | -1.865251 |
| H | 3.179712 | -3.713593 | -0.489365 |

L:

Processing: prmebcpau2p2-sp6plam6.log  
PG=C01

|        |                         |                 |
|--------|-------------------------|-----------------|
| Method | BasisSet                | Imaginary Freqs |
| RM06   | 6-31+G(d,p)/LANL2DZ(Au) | 0               |

HF Energy  
-1458.4971445

|           |         |         |        |        |
|-----------|---------|---------|--------|--------|
| ZPE       | E298    | S298    | Strans | Srot   |
| 157.48131 | 171.457 | 170.580 | 45.200 | 36.782 |

34

|    |           |           |           |
|----|-----------|-----------|-----------|
| C  | -1.652703 | 0.513833  | -0.043376 |
| C  | -1.467931 | 1.960942  | 0.088249  |
| C  | -0.091736 | 2.271695  | 0.088304  |
| C  | 0.627497  | 0.991711  | -0.033698 |
| C  | -0.453034 | -0.105365 | -0.122424 |
| C  | 0.378893  | 3.568046  | 0.195825  |
| C  | -0.564320 | 4.595195  | 0.304564  |
| C  | -1.926778 | 4.307299  | 0.306448  |
| C  | -2.389331 | 2.991166  | 0.198331  |
| C  | 1.868612  | 0.652218  | -0.048582 |
| Au | 3.731109  | -0.047403 | -0.094702 |
| P  | 5.952324  | -0.904507 | -0.153848 |
| C  | -0.089424 | -1.544877 | -0.237707 |
| C  | 0.476087  | -2.148478 | 1.049052  |
| Au | -3.469181 | -0.452578 | -0.096832 |
| P  | -5.599912 | -1.531568 | -0.153424 |
| H  | 6.383898  | -1.639278 | 0.962457  |
| H  | 6.260808  | -1.782974 | -1.205358 |
| H  | 6.977482  | 0.048023  | -0.275725 |
| H  | -0.993273 | -2.098818 | -0.529440 |
| H  | 0.634458  | -1.686446 | -1.058493 |
| H  | -5.633340 | -2.936251 | -0.075917 |
| H  | -6.521390 | -1.208931 | 0.859905  |
| H  | -6.404598 | -1.330227 | -1.290125 |
| H  | 1.442874  | 3.792664  | 0.193959  |
| H  | -0.228636 | 5.625428  | 0.386632  |
| H  | -3.456267 | 2.776550  | 0.201457  |
| H  | -2.643440 | 5.120303  | 0.392384  |

|   |           |           |          |
|---|-----------|-----------|----------|
| C | 0.947151  | -3.578768 | 0.848957 |
| H | 1.310860  | -1.527367 | 1.414036 |
| H | -0.294891 | -2.096464 | 1.831139 |
| H | 1.327741  | -4.015808 | 1.777802 |
| H | 0.131364  | -4.219412 | 0.491712 |
| H | 1.749979  | -3.629005 | 0.100181 |

**TS3:**

Processing: prmebcpau2p2-spts6plam6.log  
PG=C01

|        |                         |                 |
|--------|-------------------------|-----------------|
| Method | BasisSet                | Imaginary Freqs |
| RM06   | 6-31+G(d,p)/LANL2DZ(Au) | 1               |

HF Energy  
-1458.4933569

|           |         |         |        |        |
|-----------|---------|---------|--------|--------|
| ZPE       | E298    | S298    | Strans | Srot   |
| 156.37109 | 169.518 | 160.984 | 45.200 | 36.625 |

34

|    |           |           |           |
|----|-----------|-----------|-----------|
| C  | 0.582041  | 0.079267  | -0.243598 |
| C  | 0.258499  | 1.505644  | -0.183565 |
| C  | -1.149930 | 1.589374  | -0.084882 |
| C  | -1.740598 | 0.229718  | -0.083532 |
| C  | -0.702183 | -0.635445 | -0.194584 |
| C  | 1.053778  | 2.637368  | -0.208161 |
| C  | 0.431042  | 3.888831  | -0.132854 |
| C  | -0.954650 | 3.980089  | -0.035090 |
| C  | -1.757116 | 2.831249  | -0.009873 |
| Au | -3.741974 | -0.182040 | 0.038767  |
| P  | -6.092136 | -0.629070 | 0.174435  |
| C  | -0.573127 | -2.122560 | -0.272026 |
| C  | 0.797130  | -2.499935 | 0.208089  |
| C  | 1.752541  | -0.575696 | -0.280541 |
| Au | 3.744506  | -0.208866 | -0.001993 |
| P  | 6.042267  | 0.309514  | 0.322180  |
| H  | 6.339950  | 1.342822  | 1.227553  |
| H  | 6.873840  | -0.712860 | 0.812334  |
| H  | 6.777312  | 0.726977  | -0.801207 |
| H  | -6.636255 | -1.599467 | -0.688022 |
| H  | -6.614100 | -1.081121 | 1.401189  |
| H  | -6.973211 | 0.438423  | -0.081384 |
| C  | 1.433470  | -3.777246 | -0.244102 |
| H  | 0.992380  | -2.250082 | 1.253496  |
| H  | 1.593211  | -1.710333 | -0.597090 |
| H  | -0.726588 | -2.503708 | -1.293987 |

|   |           |           |           |
|---|-----------|-----------|-----------|
| H | -1.315304 | -2.618285 | 0.371862  |
| H | 2.137743  | 2.561455  | -0.289291 |
| H | 1.031807  | 4.794356  | -0.151872 |
| H | -2.840077 | 2.913425  | 0.068016  |
| H | -1.421936 | 4.960275  | 0.022954  |
| H | 2.493744  | -3.826570 | 0.024991  |
| H | 0.930541  | -4.604682 | 0.275439  |
| H | 1.319614  | -3.939673 | -1.321004 |

**M:**

Processing: prbchau2p2-sprcprod-a6plam6.log  
PG=C01

| Method | BasisSet                | Imaginary Freqs |
|--------|-------------------------|-----------------|
| RM06   | 6-31+G(d,p)/LANL2DZ(Au) | 0               |

HF Energy  
-1458.5172158

| ZPE       | E298    | S298    | Strans | Srot   |
|-----------|---------|---------|--------|--------|
| 157.62215 | 171.610 | 170.939 | 45.200 | 36.543 |

34

|    |           |           |           |
|----|-----------|-----------|-----------|
| C  | -1.195546 | 2.640322  | 0.224413  |
| C  | -0.502103 | 1.409852  | 0.077618  |
| C  | 0.935563  | 1.455531  | 0.141048  |
| C  | 1.605201  | 2.681711  | 0.340521  |
| C  | 0.884656  | 3.844122  | 0.479052  |
| C  | -0.524130 | 3.822534  | 0.420085  |
| C  | 1.621732  | 0.191513  | -0.022637 |
| C  | 0.714136  | -0.723369 | -0.173883 |
| C  | -0.585100 | -1.079091 | -0.291166 |
| C  | -1.205096 | 0.180345  | -0.123709 |
| Au | -3.306256 | 0.125982  | -0.123603 |
| P  | -5.684495 | 0.102558  | -0.118846 |
| Au | 3.656060  | -0.213960 | -0.058311 |
| P  | 5.978645  | -0.664959 | -0.098169 |
| C  | -1.241680 | -2.411741 | -0.440395 |
| C  | -1.575704 | -3.054075 | 0.907227  |
| C  | -2.334993 | -4.357825 | 0.731239  |
| H  | 6.834409  | 0.415691  | -0.372454 |
| H  | 6.430504  | -1.606124 | -1.039192 |
| H  | 6.556592  | -1.168665 | 1.079865  |
| H  | -2.163103 | -2.272071 | -1.025160 |
| H  | -0.595561 | -3.080464 | -1.024570 |
| H  | -6.338161 | 0.344041  | -1.340588 |
| H  | -6.336536 | 1.035243  | 0.707606  |

|   |           |           |          |
|---|-----------|-----------|----------|
| H | -6.325331 | -1.083601 | 0.282554 |
| H | -0.646792 | -3.220029 | 1.471101 |
| H | -2.169017 | -2.342822 | 1.501688 |
| H | 2.692335  | 2.688741  | 0.383629 |
| H | 1.403130  | 4.786898  | 0.634618 |
| H | -2.283629 | 2.636589  | 0.177531 |
| H | -1.080829 | 4.749533  | 0.529202 |
| H | -2.565929 | -4.822042 | 1.695057 |
| H | -3.284242 | -4.192106 | 0.204871 |
| H | -1.756229 | -5.081527 | 0.144227 |

#### TS4:

Processing: prbchau2p2-insts6plam6.log  
PG=C01

| Method | BasisSet                | Imaginary Freqs |
|--------|-------------------------|-----------------|
| RM06   | 6-31+G(d,p)/LANL2DZ(Au) | 1               |

HF Energy  
-1458.5045211

| ZPE       | E298    | S298    | Strans | Srot   |
|-----------|---------|---------|--------|--------|
| 157.16237 | 170.180 | 161.261 | 45.200 | 36.364 |

34

|    |           |           |           |
|----|-----------|-----------|-----------|
| C  | -0.727864 | 3.656187  | 0.198027  |
| C  | -1.398408 | 2.458897  | 0.125225  |
| C  | -0.717562 | 1.218993  | 0.033824  |
| C  | 0.720561  | 1.253492  | 0.024771  |
| C  | 1.382642  | 2.503436  | 0.104893  |
| C  | 0.680244  | 3.680785  | 0.188021  |
| C  | 1.479354  | 0.029797  | -0.049669 |
| C  | 0.644047  | -1.019717 | -0.138875 |
| C  | -0.741761 | -1.193405 | -0.106280 |
| C  | -1.457405 | -0.013324 | -0.028591 |
| C  | -1.223334 | -2.610344 | -0.143057 |
| C  | -0.176007 | -3.435926 | 0.614199  |
| Au | -3.532461 | -0.059890 | -0.033259 |
| P  | -5.924045 | -0.106976 | -0.051922 |
| Au | 3.548710  | -0.052057 | -0.042181 |
| P  | 5.927997  | -0.122000 | -0.040385 |
| H  | 6.586892  | 0.235258  | 1.149813  |
| H  | 6.594870  | 0.706923  | -0.960244 |
| H  | 6.549302  | -1.353897 | -0.313720 |
| H  | -2.211674 | -2.707395 | 0.318533  |
| H  | -1.320081 | -2.957050 | -1.183821 |
| H  | -6.584916 | 0.684946  | -1.009674 |

|   |           |           |           |
|---|-----------|-----------|-----------|
| H | -6.602507 | 0.304740  | 1.110656  |
| H | -6.563194 | -1.340498 | -0.278660 |
| H | -0.275192 | -3.234896 | 1.686633  |
| C | 1.214783  | -3.043361 | 0.163312  |
| H | -0.325109 | -4.510697 | 0.460457  |
| H | 2.472236  | 2.512361  | 0.097152  |
| H | 1.208922  | 4.628872  | 0.244884  |
| H | -2.487728 | 2.444630  | 0.136811  |
| H | -1.284954 | 4.587383  | 0.263928  |
| H | 1.960596  | -2.866568 | 0.938364  |
| H | 1.632956  | -3.673634 | -0.635399 |
| H | 1.230893  | -2.095091 | -0.596162 |

N:

Processing: prbchau2p2-insprod6plam6.log  
PG=C01

| Method | BasisSet                | Imaginary Freqs |
|--------|-------------------------|-----------------|
| RM06   | 6-31+G(d,p)/LANL2DZ(Au) | 0               |

HF Energy  
-1458.5663707

| ZPE       | E298    | S298    | Strans | Srot   |
|-----------|---------|---------|--------|--------|
| 159.61252 | 172.486 | 159.044 | 45.200 | 36.320 |

34

|    |           |           |           |
|----|-----------|-----------|-----------|
| C  | -1.474186 | -0.015323 | -0.127658 |
| C  | -0.717097 | 1.212476  | -0.126435 |
| C  | 0.734620  | 1.234771  | -0.075776 |
| C  | 1.477146  | 0.048428  | -0.100756 |
| C  | 0.723889  | -1.188168 | -0.320068 |
| C  | -0.756707 | -1.170673 | -0.178570 |
| C  | 1.406346  | 2.494144  | 0.005427  |
| C  | 0.721386  | 3.677501  | 0.011281  |
| C  | -0.688852 | 3.650491  | -0.064412 |
| C  | -1.378233 | 2.459612  | -0.125287 |
| Au | 3.536659  | -0.057129 | 0.007665  |
| P  | 5.925073  | -0.218771 | 0.149134  |
| C  | -1.238084 | -2.585556 | -0.043048 |
| C  | 0.018137  | -3.456168 | -0.197889 |
| C  | 1.164959  | -2.544203 | 0.242892  |
| Au | -3.543284 | -0.064000 | 0.012830  |
| P  | -5.930504 | -0.171626 | 0.170002  |
| H  | 6.521671  | 0.081143  | 1.387140  |
| H  | 6.682564  | 0.605144  | -0.702732 |
| H  | 6.513148  | -1.467932 | -0.119293 |

|   |           |           |           |
|---|-----------|-----------|-----------|
| H | -1.670193 | -2.702318 | 0.963499  |
| H | -2.039580 | -2.831798 | -0.751083 |
| H | -6.686685 | 0.678210  | -0.659136 |
| H | -6.525635 | 0.115121  | 1.413036  |
| H | -6.553534 | -1.401059 | -0.115979 |
| H | -0.035188 | -4.387759 | 0.372277  |
| H | 0.157819  | -3.728537 | -1.253382 |
| H | 2.494878  | 2.483691  | 0.051041  |
| H | 1.247860  | 4.625896  | 0.066908  |
| H | -2.466093 | 2.461884  | -0.169905 |
| H | -1.241162 | 4.587675  | -0.068735 |
| H | 1.221479  | -2.477469 | 1.338460  |
| H | 2.147969  | -2.859072 | -0.125934 |
| H | 0.875574  | -1.261650 | -1.430554 |

**E** with trimethylphosphine and BrettPhos ligands:

Processing: ebrettpme36labe.log  
PG=C01

| Method | BasisSet | Imaginary Freqs |
|--------|----------|-----------------|
| RB3LYP | LANL2DZ  | 0               |

HF Energy  
-2381.9592659

Thermochemistry will use frequencies scaled by 0.9600

| ZPE       | E298    | S298    | Strans | Srot   |
|-----------|---------|---------|--------|--------|
| 665.31317 | 707.699 | 378.929 | 47.023 | 41.050 |

127

|    |           |           |           |
|----|-----------|-----------|-----------|
| C  | -4.371742 | 3.866563  | -2.090585 |
| C  | -4.931519 | 2.716390  | -1.488876 |
| C  | -4.079950 | 1.741147  | -0.952480 |
| C  | -2.668563 | 1.936078  | -1.024581 |
| C  | -2.103575 | 3.067050  | -1.619746 |
| C  | -2.975998 | 4.041176  | -2.158147 |
| C  | -2.039797 | 0.734799  | -0.388878 |
| C  | -3.200959 | -0.166107 | 0.058337  |
| C  | -4.379520 | 0.449189  | -0.286990 |
| Au | -6.265306 | -0.275853 | 0.032664  |
| P  | -8.552081 | -1.103591 | 0.377340  |
| C  | -2.966331 | -1.478448 | 0.764343  |
| C  | -2.422031 | -1.326178 | 2.208196  |
| C  | -0.766198 | 0.459572  | -0.245507 |
| Au | 1.083740  | -0.176364 | -0.159171 |
| P  | 3.138545  | -1.519486 | -0.158725 |
| C  | 3.288635  | -2.537490 | 1.481282  |

|   |           |           |           |
|---|-----------|-----------|-----------|
| C | 2.981491  | -2.719235 | -1.647442 |
| C | 4.755117  | -0.543747 | -0.325395 |
| H | -3.922380 | -2.014614 | 0.797308  |
| H | -2.270556 | -2.102526 | 0.181635  |
| C | -9.885106 | -0.045333 | -0.424058 |
| C | -9.093550 | -1.219001 | 2.175764  |
| C | -8.875672 | -2.827352 | -0.303769 |
| H | -1.027642 | 3.203152  | -1.676193 |
| H | -2.565385 | 4.930544  | -2.628711 |
| H | -6.009371 | 2.586071  | -1.443932 |
| H | -5.026438 | 4.626586  | -2.509378 |
| H | -2.290281 | -2.311434 | 2.674069  |
| H | -1.450636 | -0.814244 | 2.220804  |
| H | -3.117957 | -0.742919 | 2.823098  |
| C | 4.013178  | -3.898828 | 1.331089  |
| H | 3.903559  | -1.886508 | 2.119578  |
| C | 4.161127  | -4.590844 | 2.709116  |
| H | 3.432800  | -4.556093 | 0.666381  |
| H | 4.993833  | -3.756073 | 0.868991  |
| C | 2.796184  | -4.769203 | 3.409058  |
| H | 4.650294  | -5.565490 | 2.575036  |
| H | 4.823758  | -3.988351 | 3.349914  |
| C | 2.057802  | -3.418369 | 3.534735  |
| H | 2.177620  | -5.471997 | 2.828911  |
| H | 2.935732  | -5.215206 | 4.402870  |
| C | 1.906306  | -2.718724 | 2.162187  |
| H | 1.064493  | -3.565956 | 3.980315  |
| H | 2.617269  | -2.759982 | 4.216974  |
| H | 1.250735  | -3.325154 | 1.519508  |
| H | 1.413390  | -1.746013 | 2.291517  |
| C | 3.143125  | -1.954874 | -2.984315 |
| H | 3.806662  | -3.429163 | -1.549415 |
| C | 3.024775  | -2.924887 | -4.185358 |
| H | 2.361267  | -1.183406 | -3.067310 |
| H | 4.112481  | -1.441714 | -3.016682 |
| C | 1.696103  | -3.712505 | -4.153249 |
| H | 3.108675  | -2.358285 | -5.122734 |
| H | 3.868838  | -3.631851 | -4.163984 |
| C | 1.518417  | -4.450951 | -2.808179 |
| H | 0.855618  | -3.016162 | -4.300647 |
| H | 1.662909  | -4.429892 | -4.984112 |
| C | 1.632005  | -3.480574 | -1.605846 |
| H | 0.543627  | -4.956567 | -2.777014 |
| H | 2.286449  | -5.234765 | -2.716979 |
| H | 0.799082  | -2.761889 | -1.642228 |
| H | 1.528544  | -4.046156 | -0.669918 |
| C | 4.802776  | 0.845762  | -0.036668 |
| C | 6.054956  | 1.523317  | -0.143627 |
| C | 7.217805  | 0.847361  | -0.536206 |



|   |           |           |           |
|---|-----------|-----------|-----------|
| C | 7.164671  | -0.523691 | -0.824277 |
| C | 5.951223  | -1.215616 | -0.714003 |
| C | 3.627629  | 1.692620  | 0.393660  |
| O | 6.034285  | 2.884014  | 0.169532  |
| H | 8.165563  | 1.367499  | -0.620018 |
| H | 8.071451  | -1.035599 | -1.125769 |
| O | 5.852222  | -2.587981 | -0.973608 |
| C | 7.041858  | -3.325087 | -1.393236 |
| H | 6.707663  | -4.355368 | -1.529489 |
| H | 7.433403  | -2.935160 | -2.341445 |
| H | 7.821936  | -3.289499 | -0.621881 |
| C | 7.276701  | 3.647269  | 0.093212  |
| H | 7.003349  | 4.663268  | 0.382266  |
| H | 8.028413  | 3.253696  | 0.790728  |
| H | 7.680824  | 3.648751  | -0.928170 |
| C | 3.371903  | 1.892270  | 1.782810  |
| C | 2.389156  | 2.823069  | 2.165850  |
| C | 1.658312  | 3.583666  | 1.231556  |
| C | 1.928534  | 3.375910  | -0.132196 |
| C | 2.904323  | 2.452837  | -0.574226 |
| C | 4.194620  | 1.196085  | 2.875500  |
| H | 2.204684  | 2.988847  | 3.225496  |
| C | 0.624799  | 4.591912  | 1.743870  |
| H | 1.407309  | 3.974640  | -0.873525 |
| C | 3.233395  | 2.382951  | -2.072911 |
| C | 3.990665  | 3.664219  | -2.521191 |
| H | 3.906806  | 1.532943  | -2.237904 |
| C | 1.989800  | 2.164586  | -2.970465 |
| H | 2.296479  | 2.062063  | -4.019615 |
| H | 1.437599  | 1.258387  | -2.688206 |
| H | 1.295521  | 3.013415  | -2.916597 |
| H | 4.298274  | 3.579126  | -3.571861 |
| H | 3.348912  | 4.550209  | -2.428779 |
| H | 4.880203  | 3.827134  | -1.904461 |
| H | 4.787944  | 0.399560  | 2.408544  |
| C | 5.199140  | 2.191198  | 3.519794  |
| C | 3.313328  | 0.543535  | 3.970253  |
| H | 5.828818  | 1.677681  | 4.258574  |
| H | 5.844623  | 2.642398  | 2.758855  |
| H | 4.667942  | 3.002486  | 4.034336  |
| H | 3.939154  | -0.024725 | 4.671103  |
| H | 2.773691  | 1.298229  | 4.555486  |
| H | 2.568554  | -0.136758 | 3.539408  |
| C | -0.686662 | 3.872709  | 2.167898  |
| H | 1.050110  | 5.045170  | 2.652812  |
| C | 0.316057  | 5.740348  | 0.758469  |
| H | -1.385635 | 4.588649  | 2.619461  |
| H | -1.181503 | 3.418989  | 1.300106  |
| H | -0.490000 | 3.079815  | 2.900309  |

|   |            |           |           |
|---|------------|-----------|-----------|
| H | -0.335347  | 6.481079  | 1.238833  |
| H | 1.230554   | 6.252870  | 0.433954  |
| H | -0.211005  | 5.377311  | -0.134053 |
| H | -10.123590 | -1.586300 | 2.245550  |
| H | -8.428718  | -1.899889 | 2.715843  |
| H | -9.029808  | -0.230358 | 2.640273  |
| H | -9.918792  | -3.119175 | -0.137893 |
| H | -8.662098  | -2.841634 | -1.376814 |
| H | -8.215864  | -3.546401 | 0.191254  |
| H | -10.878132 | -0.468701 | -0.235703 |
| H | -9.841368  | 0.968778  | -0.015344 |
| H | -9.712672  | 0.006348  | -1.503349 |

Method      BasisSet  
RB3LYP      6-31G(d)/LANL2DZ(Au)

HF Energy  
-3051.99518920

Processing: ebrettpme3-b6dlabe.log  
Frequency job incomplete: ebrettpme3-b6dlabe.log  
127

|    |           |           |           |
|----|-----------|-----------|-----------|
| C  | -4.025700 | -2.648114 | -2.305105 |
| C  | -3.333501 | -2.937500 | -0.957305 |
| C  | -1.907541 | -3.480103 | -1.210985 |
| C  | -1.946088 | -4.753439 | -2.072600 |
| C  | -2.669415 | -4.508918 | -3.403777 |
| C  | -4.068205 | -3.919551 | -3.173680 |
| P  | -3.298728 | -1.490973 | 0.260763  |
| Au | -1.132290 | -0.455242 | 0.334446  |
| C  | 0.743993  | 0.112232  | 0.503406  |
| C  | 1.995519  | 0.399147  | 0.662146  |
| C  | 2.590515  | 1.542052  | 1.411102  |
| C  | 3.994702  | 1.416910  | 1.271623  |
| C  | 4.321037  | 0.231506  | 0.461651  |
| C  | 3.170968  | -0.391422 | 0.090431  |
| C  | 4.814651  | 2.362232  | 1.883336  |
| C  | 4.233538  | 3.404964  | 2.617919  |
| C  | 2.846801  | 3.508759  | 2.745989  |
| C  | 2.003087  | 2.568551  | 2.136770  |
| Au | 6.224794  | -0.363297 | -0.027129 |
| P  | 8.457260  | -1.003481 | -0.582905 |
| C  | 8.808010  | -1.049128 | -2.390726 |
| C  | 2.958156  | -1.624106 | -0.739843 |
| C  | 2.341808  | -1.355841 | -2.124424 |
| C  | -4.721154 | -0.364213 | -0.090973 |
| C  | -4.562530 | 1.009857  | -0.396176 |
| C  | -5.725900 | 1.785208  | -0.650035 |
| C  | -6.995660 | 1.217037  | -0.580617 |

|   |           |           |           |
|---|-----------|-----------|-----------|
| C | -7.147543 | -0.135221 | -0.281612 |
| C | -6.026921 | -0.925097 | -0.049422 |
| C | -3.252272 | 1.754649  | -0.509688 |
| C | -2.749386 | 2.491870  | 0.594488  |
| C | -1.627860 | 3.312583  | 0.404861  |
| C | -0.997046 | 3.455323  | -0.832639 |
| C | -1.512039 | 2.721611  | -1.904201 |
| C | -2.624273 | 1.881874  | -1.775790 |
| C | -3.436003 | 2.500194  | 1.960382  |
| C | -4.246681 | 3.799385  | 2.159088  |
| C | -3.154799 | 1.188340  | -3.030118 |
| C | -3.814706 | 2.204226  | -3.986188 |
| C | 0.160477  | 4.430969  | -1.005323 |
| C | 1.359609  | 3.826706  | -1.756422 |
| O | -6.106834 | -2.268158 | 0.208165  |
| C | -7.388980 | -2.888840 | 0.239222  |
| O | -5.511688 | 3.097038  | -0.964894 |
| C | -6.635661 | 3.925743  | -1.239746 |
| C | -3.629618 | -2.273419 | 1.941448  |
| C | -3.763930 | -1.206933 | 3.045289  |
| C | -4.053873 | -1.847356 | 4.413859  |
| C | -2.987148 | -2.885130 | 4.788539  |
| C | -2.845106 | -3.945528 | 3.689597  |
| C | -2.551865 | -3.314329 | 2.315826  |
| C | -2.065828 | 0.383464  | -3.764857 |
| C | -0.320875 | 5.726382  | -1.691386 |
| C | -2.456410 | 2.311692  | 3.134520  |
| C | 8.953541  | -2.674180 | 0.014122  |
| C | 9.747131  | 0.120871  | 0.098954  |
| H | 3.932691  | -2.108715 | -0.865677 |
| H | 2.322697  | -2.335430 | -0.191927 |
| H | 0.925076  | 2.649953  | 2.234198  |
| H | 2.414891  | 4.321016  | 3.323081  |
| H | 5.894595  | 2.288554  | 1.791232  |
| H | 4.871996  | 4.141990  | 3.096791  |
| H | 2.219065  | -2.293563 | -2.678091 |
| H | 1.355239  | -0.883973 | -2.042261 |
| H | 2.982059  | -0.689804 | -2.712775 |
| H | -3.919374 | -3.707858 | -0.438993 |
| H | -1.322955 | -2.708044 | -1.731099 |
| H | -1.385079 | -3.680200 | -0.269645 |
| H | -0.922469 | -5.105104 | -2.250674 |
| H | -2.457732 | -5.552274 | -1.516236 |
| H | -2.077628 | -3.811043 | -4.013692 |
| H | -2.740095 | -5.441662 | -3.975923 |
| H | -4.547844 | -3.688129 | -4.132560 |
| H | -4.703410 | -4.669626 | -2.680069 |
| H | -3.475448 | -1.864315 | -2.840106 |
| H | -5.041674 | -2.277456 | -2.147641 |

|   |           |           |           |
|---|-----------|-----------|-----------|
| H | -4.589102 | -2.788513 | 1.833380  |
| H | -2.829178 | -0.633518 | 3.108024  |
| H | -4.558263 | -0.495616 | 2.792485  |
| H | -4.112681 | -1.062553 | 5.177741  |
| H | -5.041070 | -2.331093 | 4.386017  |
| H | -2.021574 | -2.378735 | 4.932997  |
| H | -3.237269 | -3.360521 | 5.744402  |
| H | -2.046238 | -4.654152 | 3.939385  |
| H | -3.773526 | -4.531382 | 3.625776  |
| H | -1.564751 | -2.829715 | 2.340209  |
| H | -2.498874 | -4.107628 | 1.562224  |
| H | -7.881205 | 1.812884  | -0.765607 |
| H | -8.144507 | -0.556413 | -0.242698 |
| H | -7.202332 | -3.943189 | 0.447613  |
| H | -8.017313 | -2.466611 | 1.032494  |
| H | -7.900740 | -2.792871 | -0.725750 |
| H | -6.225529 | 4.910372  | -1.467460 |
| H | -7.202730 | 3.558844  | -2.104532 |
| H | -7.301272 | 4.001261  | -0.370609 |
| H | -1.049982 | 2.822166  | -2.881898 |
| H | -1.256462 | 3.893771  | 1.245396  |
| H | -4.144243 | 1.665819  | 1.986973  |
| H | -3.010385 | 2.198175  | 4.073438  |
| H | -1.826082 | 1.425106  | 3.002509  |
| H | -1.795464 | 3.177552  | 3.255046  |
| H | -4.793676 | 3.768804  | 3.108900  |
| H | -3.583125 | 4.671968  | 2.182038  |
| H | -4.963358 | 3.946799  | 1.347409  |
| H | -3.933021 | 0.481897  | -2.724328 |
| H | -4.259381 | 1.690089  | -4.846519 |
| H | -4.599384 | 2.770480  | -3.475983 |
| H | -3.079612 | 2.922016  | -4.369025 |
| H | -2.502461 | -0.168405 | -4.605731 |
| H | -1.284695 | 1.033636  | -4.174520 |
| H | -1.579051 | -0.337069 | -3.096861 |
| H | 0.507402  | 4.699872  | 0.001715  |
| H | 2.184751  | 4.546976  | -1.791129 |
| H | 1.723435  | 2.918801  | -1.264302 |
| H | 1.104456  | 3.573178  | -2.792079 |
| H | 0.496362  | 6.453803  | -1.759516 |
| H | -0.675536 | 5.522527  | -2.708871 |
| H | -1.144494 | 6.188846  | -1.136604 |
| H | 9.846298  | -1.341099 | -2.582339 |
| H | 8.137677  | -1.764384 | -2.876480 |
| H | 8.625563  | -0.061342 | -2.823983 |
| H | 9.986078  | -2.901694 | -0.272284 |
| H | 8.864132  | -2.716146 | 1.103585  |
| H | 8.287379  | -3.429641 | -0.412883 |
| H | 10.750612 | -0.211446 | -0.188029 |

H 9.583896 1.135714 -0.275724  
H 9.674124 0.142592 1.190367

**J** with trimethylphosphine and BrettPhos ligands:

Processing: jbrettpme36labe.log  
PG=C01

Method BasisSet Imaginary Freqs  
RB3LYP LANL2DZ 0

HF Energy  
-2381.9445231

Thermochemistry will use frequencies scaled by 0.9600

| ZPE       | E298    | S298    | Strans | Srot   |
|-----------|---------|---------|--------|--------|
| 665.59352 | 707.811 | 373.613 | 47.023 | 40.794 |

127

|    |           |           |           |
|----|-----------|-----------|-----------|
| C  | -4.724710 | 3.251829  | 2.666503  |
| C  | -4.789040 | 2.145247  | 1.825742  |
| C  | -3.626117 | 1.447648  | 1.367477  |
| C  | -2.340446 | 2.012577  | 1.864282  |
| C  | -2.292011 | 3.141783  | 2.720459  |
| C  | -3.473677 | 3.754796  | 3.119306  |
| C  | -1.359900 | 1.210490  | 1.314867  |
| C  | -1.227866 | 0.172881  | 0.563515  |
| C  | -2.516434 | -0.376651 | 0.077508  |
| C  | -3.681811 | 0.288404  | 0.493903  |
| C  | -2.477382 | -1.628724 | -0.781569 |
| C  | -2.267334 | -2.914060 | 0.057137  |
| Au | -5.530449 | -0.409600 | -0.147933 |
| P  | -7.718578 | -1.215845 | -0.905682 |
| Au | 0.774456  | -0.418573 | 0.371624  |
| P  | 2.992135  | -1.394533 | 0.164910  |
| C  | 4.420016  | -0.208031 | -0.239564 |
| C  | 2.820657  | -2.661334 | -1.296924 |
| C  | 3.424851  | -2.316606 | 1.808349  |
| H  | -3.416981 | -1.712878 | -1.340201 |
| H  | -1.665977 | -1.536408 | -1.516183 |
| C  | -9.185709 | -0.392874 | -0.063632 |
| C  | -8.019755 | -3.053486 | -0.638347 |
| C  | -8.050584 | -0.961929 | -2.739872 |
| H  | -2.203623 | -3.795662 | -0.594047 |
| H  | -1.340697 | -2.852247 | 0.642957  |
| H  | -3.099592 | -3.059098 | 0.757145  |
| H  | -1.327673 | 3.505837  | 3.060479  |
| H  | -3.443964 | 4.617868  | 3.778196  |

|   |           |           |           |
|---|-----------|-----------|-----------|
| H | -5.755351 | 1.777571  | 1.493463  |
| H | -5.642676 | 3.738566  | 2.983843  |
| C | 1.891770  | -3.840351 | -0.908909 |
| H | 2.282657  | -2.057445 | -2.041498 |
| C | 1.557367  | -4.699319 | -2.153279 |
| H | 2.391671  | -4.475720 | -0.163493 |
| H | 0.961955  | -3.468515 | -0.457442 |
| C | 2.837345  | -5.208288 | -2.852032 |
| H | 0.924105  | -5.545313 | -1.852441 |
| H | 0.969107  | -4.096203 | -2.862665 |
| C | 3.781095  | -4.036802 | -3.200652 |
| H | 3.360209  | -5.911947 | -2.185339 |
| H | 2.574847  | -5.767190 | -3.760324 |
| C | 4.119811  | -3.181224 | -1.953804 |
| H | 4.711959  | -4.417545 | -3.643148 |
| H | 3.305956  | -3.399667 | -3.963033 |
| H | 4.682205  | -3.787816 | -1.233437 |
| H | 4.766124  | -2.345939 | -2.246619 |
| C | 2.162125  | -2.937697 | 2.461608  |
| H | 4.123292  | -3.110057 | 1.519857  |
| C | 2.537893  | -3.717712 | 3.746242  |
| H | 1.455883  | -2.134945 | 2.722979  |
| H | 1.641588  | -3.607367 | 1.769290  |
| C | 3.279402  | -2.820426 | 4.760111  |
| H | 1.625636  | -4.130295 | 4.198703  |
| H | 3.175421  | -4.575473 | 3.480138  |
| C | 4.509157  | -2.150880 | 4.109009  |
| H | 2.592603  | -2.041614 | 5.126921  |
| H | 3.587108  | -3.410057 | 5.634174  |
| C | 4.130369  | -1.379522 | 2.820775  |
| H | 4.987971  | -1.462152 | 4.818811  |
| H | 5.255901  | -2.921670 | 3.861169  |
| H | 3.456322  | -0.550265 | 3.081690  |
| H | 5.032076  | -0.942677 | 2.381127  |
| C | 4.226174  | 1.154766  | -0.596261 |
| C | 5.378806  | 1.961166  | -0.842774 |
| C | 6.673493  | 1.428637  | -0.784544 |
| C | 6.858210  | 0.079692  | -0.451147 |
| C | 5.747247  | -0.725935 | -0.170788 |
| C | 2.893255  | 1.864276  | -0.692530 |
| O | 5.125359  | 3.302821  | -1.138947 |
| H | 7.541556  | 2.045854  | -0.988034 |
| H | 7.864064  | -0.321747 | -0.403029 |
| O | 5.875951  | -2.065385 | 0.212742  |
| C | 2.379313  | 2.503442  | 0.478003  |
| C | 1.203257  | 3.276147  | 0.387817  |
| C | 0.506330  | 3.443834  | -0.822152 |
| C | 1.035269  | 2.816536  | -1.960721 |
| C | 2.227766  | 2.056656  | -1.942538 |

|   |            |           |           |
|---|------------|-----------|-----------|
| C | 3.114249   | 2.454412  | 1.825835  |
| H | 0.835634   | 3.784661  | 1.277168  |
| C | -0.729464  | 4.341956  | -0.894852 |
| H | 0.528856   | 2.940919  | -2.915816 |
| C | 2.711081   | 1.639582  | -3.350868 |
| C | 3.561862   | 0.362907  | -3.516997 |
| H | 1.790164   | 1.463076  | -3.927256 |
| C | 3.432473   | 2.839657  | -4.032929 |
| H | 3.653273   | 0.137813  | -4.588103 |
| H | 4.574080   | 0.474626  | -3.117503 |
| H | 3.095170   | -0.501547 | -3.036202 |
| H | 3.686329   | 2.588118  | -5.071427 |
| H | 2.796390   | 3.732575  | -4.042622 |
| H | 4.353083   | 3.091848  | -3.496754 |
| C | 2.185259   | 2.112931  | 3.018123  |
| H | 3.880669   | 1.672742  | 1.777218  |
| C | 3.849241   | 3.798519  | 2.088628  |
| H | 4.433488   | 3.743044  | 3.016961  |
| H | 4.523933   | 4.041046  | 1.260942  |
| H | 3.131348   | 4.623163  | 2.189802  |
| H | 2.776682   | 1.991491  | 3.935255  |
| H | 1.457631   | 2.913494  | 3.206721  |
| H | 1.626795   | 1.183917  | 2.842632  |
| C | 7.200843   | -2.676067 | 0.241521  |
| C | 6.250615   | 4.199441  | -1.383775 |
| H | 5.799287   | 5.174257  | -1.575292 |
| H | 6.908076   | 4.261441  | -0.505970 |
| H | 6.830777   | 3.882569  | -2.261186 |
| H | 7.034080   | -3.714019 | 0.535763  |
| H | 7.672422   | -2.643954 | -0.749355 |
| H | 7.847165   | -2.184262 | 0.979994  |
| C | -0.351328  | 5.736074  | -1.467416 |
| C | -1.892845  | 3.719869  | -1.704727 |
| H | -1.087632  | 4.496563  | 0.133796  |
| H | -2.775153  | 4.371389  | -1.659265 |
| H | -1.627212  | 3.601314  | -2.763465 |
| H | -2.174564  | 2.734690  | -1.313826 |
| H | -1.223346  | 6.403377  | -1.465150 |
| H | 0.443776   | 6.207551  | -0.876346 |
| H | 0.005742   | 5.648764  | -2.502208 |
| H | -9.046407  | -1.332716 | -3.007281 |
| H | -7.984986  | 0.104013  | -2.977804 |
| H | -7.296063  | -1.495292 | -3.325980 |
| H | -9.015535  | -3.337038 | -0.997020 |
| H | -7.262992  | -3.631469 | -1.177340 |
| H | -7.939865  | -3.284806 | 0.428091  |
| H | -10.127757 | -0.797237 | -0.450431 |
| H | -9.133846  | -0.567282 | 1.015377  |
| H | -9.154692  | 0.685772  | -0.245168 |

Method BasisSet  
RB3LYP 6-31G(d)/LANL2DZ(Au)

HF Energy  
-3051.99456170

127

|    |           |           |           |
|----|-----------|-----------|-----------|
| C  | 1.734671  | -3.633700 | -0.958532 |
| C  | 3.121947  | -2.964687 | -0.822256 |
| C  | 3.709855  | -2.705086 | -2.224504 |
| C  | 3.810609  | -4.016978 | -3.024149 |
| C  | 2.455245  | -4.728157 | -3.135975 |
| C  | 1.831083  | -4.948879 | -1.751419 |
| P  | 3.042644  | -1.440281 | 0.295564  |
| Au | 0.858011  | -0.507743 | 0.352382  |
| C  | -1.120881 | 0.162778  | 0.533575  |
| C  | -1.261567 | 1.225751  | 1.228865  |
| C  | -2.198061 | 2.056152  | 1.774506  |
| C  | -3.490667 | 1.482280  | 1.331268  |
| C  | -3.572323 | 0.301530  | 0.510481  |
| C  | -2.426003 | -0.375158 | 0.105100  |
| C  | -4.625414 | 2.209230  | 1.788215  |
| C  | -4.532452 | 3.338049  | 2.575898  |
| C  | -3.277215 | 3.844673  | 2.974923  |
| C  | -2.119793 | 3.212401  | 2.577034  |
| Au | -5.439969 | -0.409950 | -0.080047 |
| P  | -7.579121 | -1.201351 | -0.775812 |
| C  | -7.854683 | -3.005110 | -0.521836 |
| C  | -2.415105 | -1.660733 | -0.696602 |
| C  | -2.284737 | -2.912030 | 0.187962  |
| C  | 4.394494  | -0.274204 | -0.203428 |
| C  | 4.168925  | 1.069864  | -0.591971 |
| C  | 5.286644  | 1.860822  | -0.974682 |
| C  | 6.578797  | 1.343291  | -0.941830 |
| C  | 6.798290  | 0.024666  | -0.550230 |
| C  | 5.723211  | -0.782000 | -0.194322 |
| C  | 2.834241  | 1.778297  | -0.665296 |
| C  | 2.110925  | 1.796307  | -1.886185 |
| C  | 0.973602  | 2.605596  | -1.996209 |
| C  | 0.525954  | 3.414399  | -0.950762 |
| C  | 1.252543  | 3.380085  | 0.243491  |
| C  | 2.400774  | 2.593762  | 0.410149  |
| C  | 2.565318  | 1.021000  | -3.121442 |
| C  | 1.450099  | 0.130120  | -3.701922 |
| C  | 3.174415  | 2.701448  | 1.724086  |
| C  | 2.275956  | 2.549104  | 2.966576  |
| C  | -0.656395 | 4.362910  | -1.106877 |
| C  | -0.210448 | 5.665860  | -1.803601 |
| O  | 5.872670  | -2.096024 | 0.164014  |



|   |           |           |           |
|---|-----------|-----------|-----------|
| C | 7.178428  | -2.664820 | 0.168410  |
| O | 5.005434  | 3.137794  | -1.371677 |
| C | 6.077606  | 3.974998  | -1.788646 |
| C | 3.490828  | -2.072241 | 2.012588  |
| C | 2.429282  | -3.048845 | 2.562472  |
| C | 2.810840  | -3.555511 | 3.965993  |
| C | 3.056757  | -2.399954 | 4.944963  |
| C | 4.112405  | -1.432292 | 4.395106  |
| C | 3.731244  | -0.912261 | 2.998207  |
| C | 3.956496  | 4.029853  | 1.801097  |
| C | -1.857231 | 3.738133  | -1.837602 |
| C | 3.111695  | 1.977182  | -4.202520 |
| C | -7.933336 | -0.936629 | -2.563993 |
| C | -8.998729 | -0.405003 | 0.086641  |
| H | -3.338467 | -1.724669 | -1.282660 |
| H | -1.582286 | -1.628934 | -1.409860 |
| H | -2.256765 | -3.819046 | -0.427031 |
| H | -1.365557 | -2.877988 | 0.784962  |
| H | -3.131998 | -2.988988 | 0.878373  |
| H | -1.143580 | 3.577882  | 2.876167  |
| H | -3.221919 | 4.732370  | 3.597439  |
| H | -5.602991 | 1.839534  | 1.495629  |
| H | -5.439329 | 3.843246  | 2.894299  |
| H | 3.795148  | -3.652950 | -0.295119 |
| H | 3.063875  | -2.002443 | -2.765846 |
| H | 4.697202  | -2.242363 | -2.153051 |
| H | 4.214325  | -3.804637 | -4.021726 |
| H | 4.533162  | -4.683479 | -2.530782 |
| H | 1.774691  | -4.116641 | -3.746107 |
| H | 2.569859  | -5.685040 | -3.659147 |
| H | 0.831989  | -5.391660 | -1.846593 |
| H | 2.438863  | -5.669159 | -1.184614 |
| H | 1.057182  | -2.943209 | -1.480742 |
| H | 1.286101  | -3.821472 | 0.022339  |
| H | 4.431478  | -2.615996 | 1.880241  |
| H | 1.453810  | -2.542832 | 2.608025  |
| H | 2.310847  | -3.907227 | 1.892108  |
| H | 2.018577  | -4.215507 | 4.339751  |
| H | 3.719957  | -4.169889 | 3.892369  |
| H | 2.115235  | -1.855967 | 5.110263  |
| H | 3.368616  | -2.790021 | 5.921164  |
| H | 4.246724  | -0.582651 | 5.075663  |
| H | 5.084018  | -1.944313 | 4.339142  |
| H | 2.817254  | -0.308529 | 3.076254  |
| H | 4.519016  | -0.250509 | 2.621216  |
| H | 7.428870  | 1.952521  | -1.223855 |
| H | 7.811102  | -0.358590 | -0.537523 |
| H | 0.936422  | 4.025288  | 1.060101  |
| H | 0.439159  | 2.619509  | -2.941136 |

|   |           |           |           |
|---|-----------|-----------|-----------|
| H | 3.388647  | 0.363013  | -2.826650 |
| H | 1.837658  | -0.473685 | -4.531077 |
| H | 1.043964  | -0.547481 | -2.941589 |
| H | 0.616763  | 0.723857  | -4.093983 |
| H | 3.501861  | 1.409656  | -5.055736 |
| H | 2.324192  | 2.642733  | -4.575130 |
| H | 3.916265  | 2.601964  | -3.803701 |
| H | 3.905444  | 1.887399  | 1.749346  |
| H | 4.562129  | 4.066954  | 2.714436  |
| H | 4.617119  | 4.150394  | 0.938894  |
| H | 3.270902  | 4.885464  | 1.818694  |
| H | 2.888898  | 2.502800  | 3.874098  |
| H | 1.597040  | 3.402254  | 3.082343  |
| H | 1.668441  | 1.638560  | 2.919209  |
| H | 5.617994  | 4.924487  | -2.066045 |
| H | 6.796337  | 4.143362  | -0.976557 |
| H | 6.599512  | 3.555546  | -2.658026 |
| H | 7.047482  | -3.704563 | 0.471393  |
| H | 7.631371  | -2.630324 | -0.829691 |
| H | 7.832603  | -2.155968 | 0.886516  |
| H | -0.990245 | 4.629036  | -0.094591 |
| H | -2.703901 | 4.433889  | -1.831309 |
| H | -1.625665 | 3.520567  | -2.886876 |
| H | -2.179392 | 2.805409  | -1.362460 |
| H | -1.042859 | 6.376696  | -1.864703 |
| H | 0.610669  | 6.147144  | -1.261224 |
| H | 0.136185  | 5.463077  | -2.824002 |
| H | -8.930196 | -1.306560 | -2.827131 |
| H | -7.873284 | 0.131145  | -2.794353 |
| H | -7.184965 | -1.458657 | -3.167553 |
| H | -8.852699 | -3.301617 | -0.862159 |
| H | -7.102461 | -3.573533 | -1.076699 |
| H | -7.750800 | -3.245665 | 0.540303  |
| H | -9.952179 | -0.801327 | -0.278993 |
| H | -8.923419 | -0.586891 | 1.162870  |
| H | -8.971803 | 0.675698  | -0.081916 |

Apr 6 2011

USER:

SOLVENT: cdcl3

Experiment = s2pul

Pulse length = 11.663 usec

Relaxation delay = 4.800 sec

NA = 8

Solvent = cdcl3

FID PTS1d = 20006

PTS1d = 32768

F1 = 399.950684 MHz

F2 = 100.575279 MHz

SW1 = 8002.40 Hz

AT1 = 2.50 sec

Hz per Pt 1stD = 0.24 Hz

SW2 = 1.00 Hz

Hz per Pt 2ndD = 1.00 Hz

O1 = 2006.7504 Hz

O2 = -0.5000 Hz

LB1 = 0.00 Hz

TP A = -46.54

B = -28.31

C = 0.00

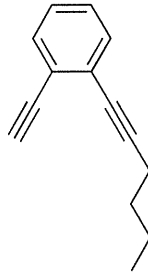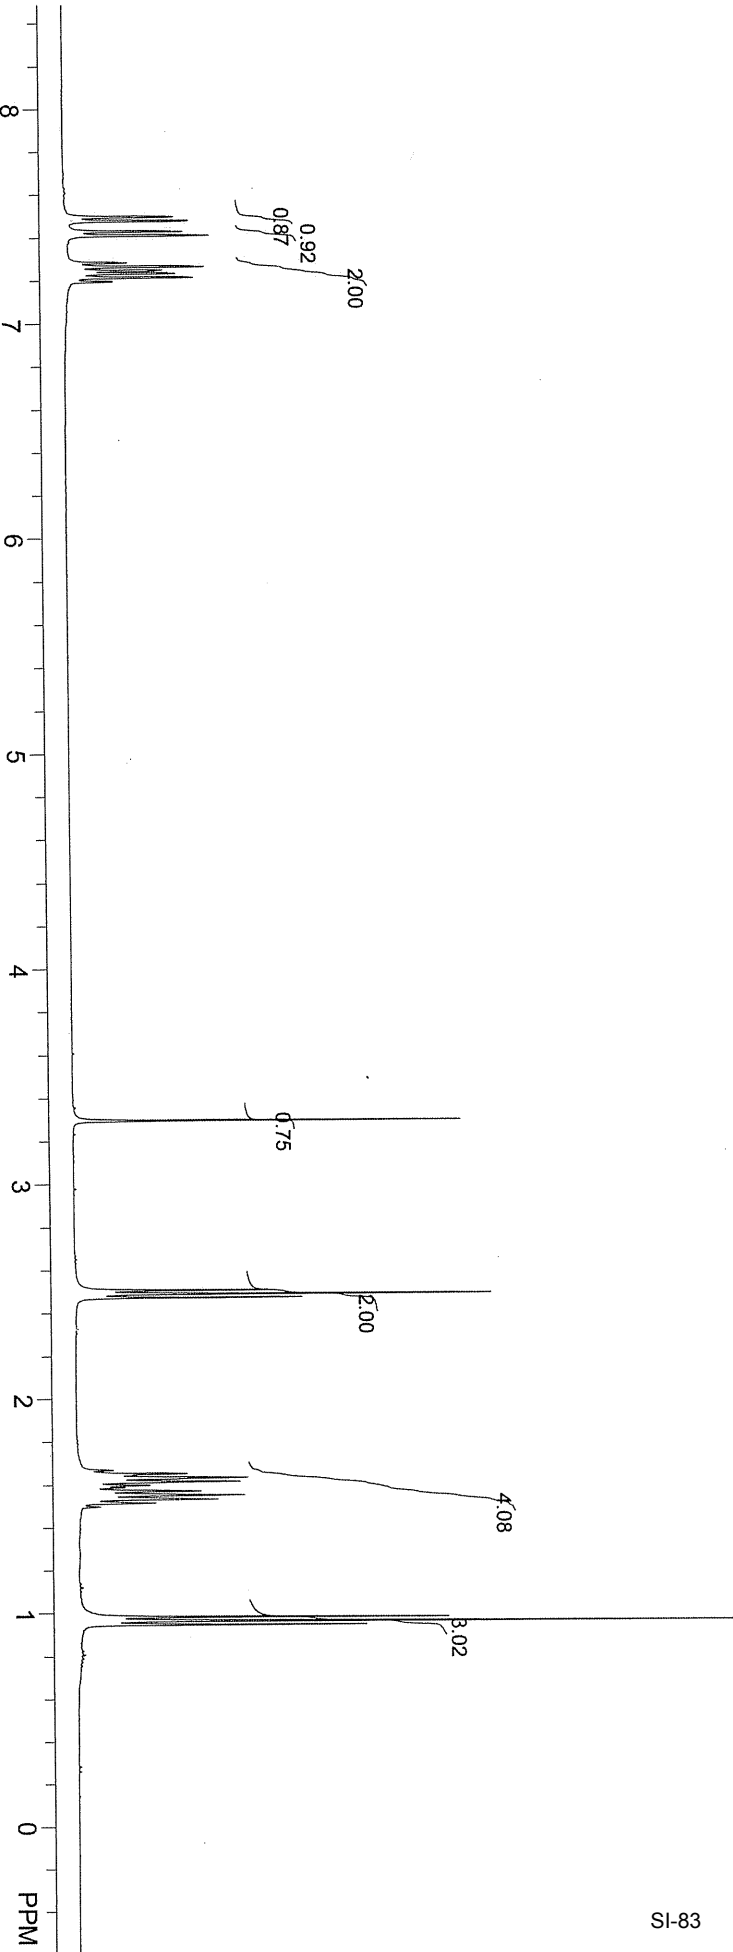

C:\Users\zhanglab1\Desktop\NMR\Ntus 20080731\DATA\yw-5-146-c1.fid

yw-5-146-c  
Apr 6 2011

USER:

SOLVENT: cdcl3

Experiment = s2pul  
Pulse length = 7.775 usec

Relaxation delay = 1.300 sec

NA = 138

Solvent = cdcl3  
FID PTS1d = 28040

PTS1d = 32768

F1 = 100.577232 MHz

F2 = 399.950684 MHz

SW1 = 28040.66 Hz

AT1 = 1.00 sec

Hz per Pt 1stD = 0.86 Hz

SW2 = 1.00 Hz

Hz per Pt 2ndD = 1.00 Hz

O1 = 10049.5156 Hz

O2 = -0.5000 Hz

LB1 = 2.00 Hz

TP A = 99.84

B = -5.63

C = 0.00

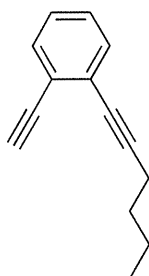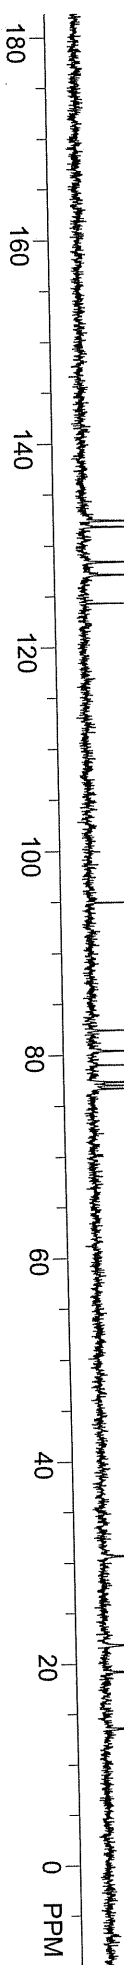

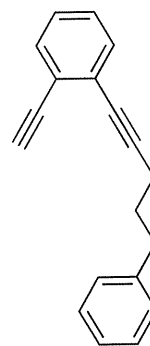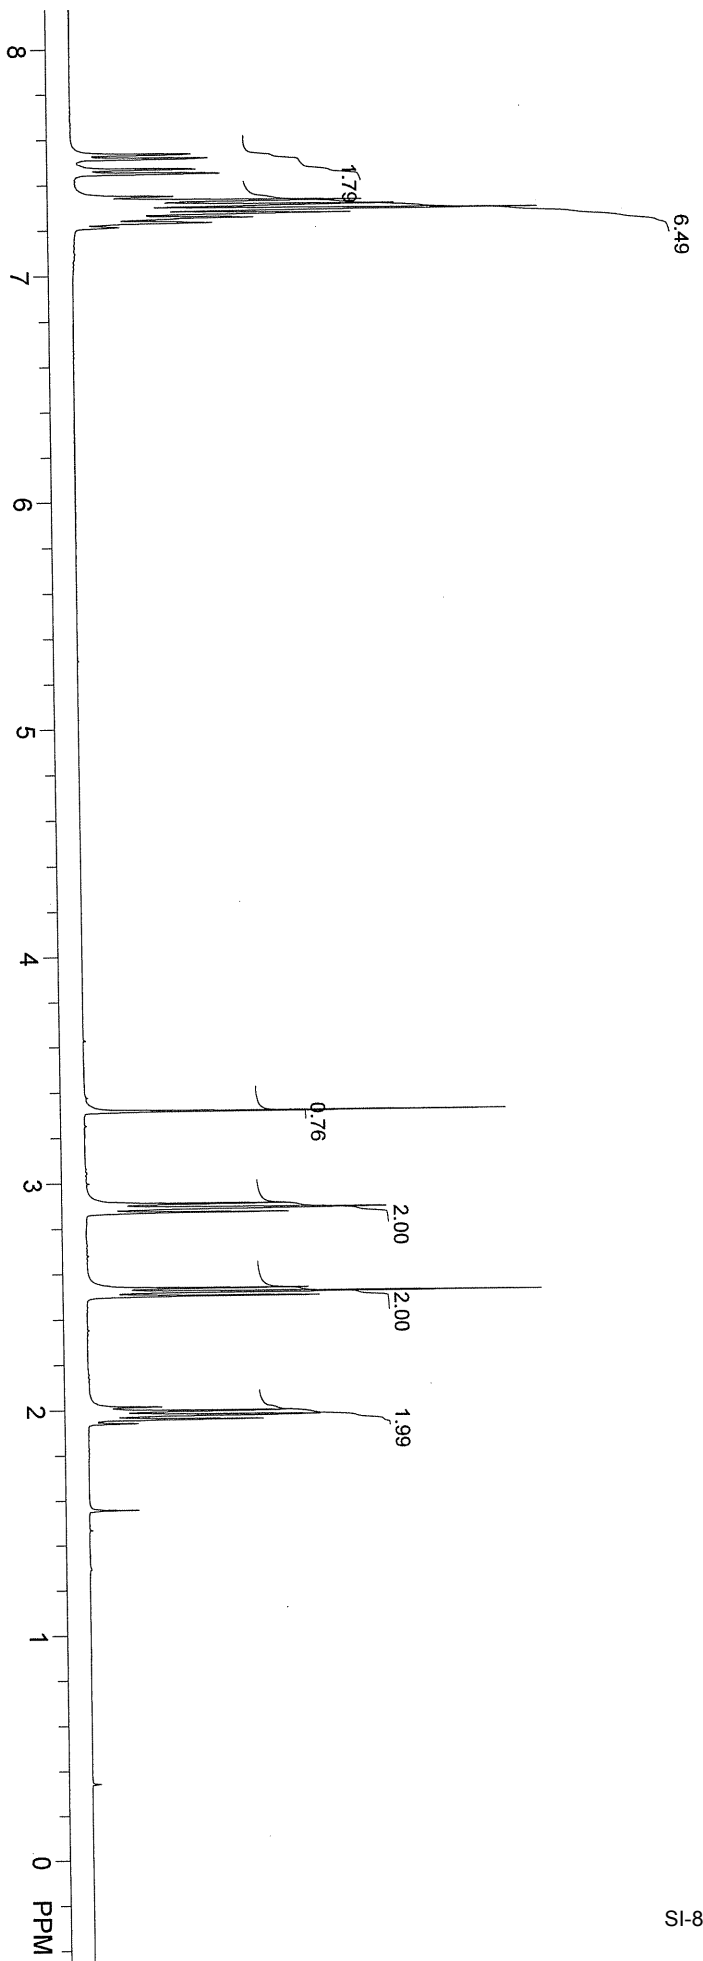

Apr 12 2011

USER:

SOLVENT: cdcl3

Experiment = s2pul

Pulse length = 7.775 usec

Relaxation delay = 1.300 sec

NA = 106

Solvent = cdcl3

FID PTS1d = 28040

PTS1d = 32768

F1 = 100.577232 MHz

F2 = 399.950684 MHz

SW1 = 28040.66 Hz

AT1 = 1.00 sec

Hz per Pt 1std = 0.86 Hz

SW2 = 1.00 Hz

Hz per Pt 2ndd = 1.00 Hz

O1 = 10050.3711 Hz

O2 = -0.5000 Hz

LB1 = 2.00 Hz

TP A = -7.50

B = -33.75

C = 0.00

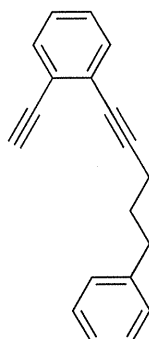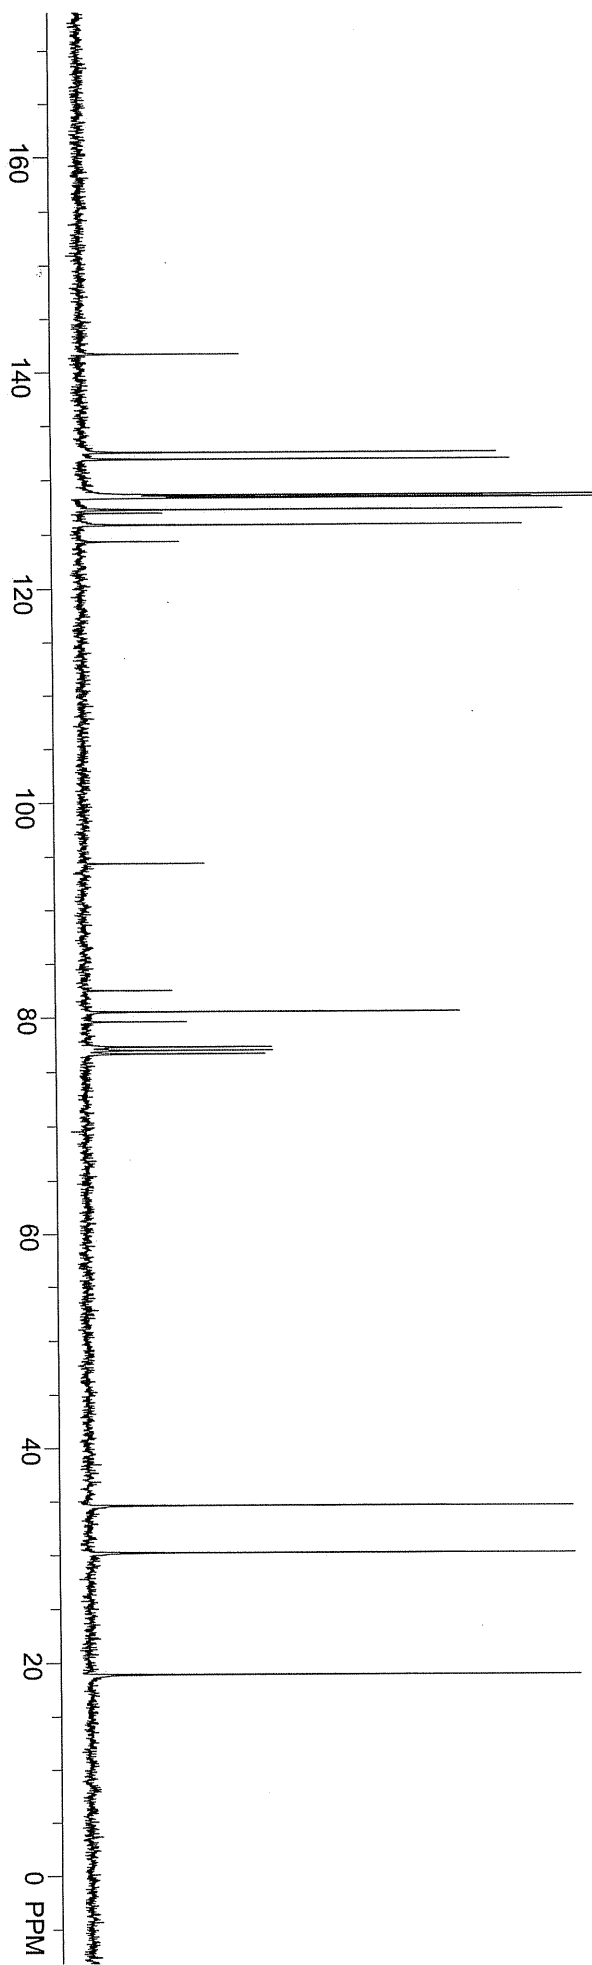

C:\Users\zhanglab1\Desktop\NMR\Ntus 20080731\DATA\5jw-5-163-s-h.fid  
new experiment  
Apr 18 2011

USER:  
SOLVENT: cdcl3  
Experiment = s2pul  
Pulse length = 11.663 usec  
Relaxation delay = 4.800 sec  
NA = 8

Solvent = cdcl3  
FID PTS1d = 20006  
PTS1d = 32768  
F1 = 399.950684 MHz  
F2 = 100.575279 MHz  
SW1 = 8002.40 Hz  
AT1 = 2.50 sec  
Hz per Pt 1stD = 0.24 Hz  
SW2 = 1.00 Hz  
Hz per Pt 2ndD = 1.00 Hz  
O1 = 2006.7504 Hz  
O2 = -0.5000 Hz  
LB1 = 0.00 Hz  
TP A = -50.32  
B = -30.44  
C = 0.00

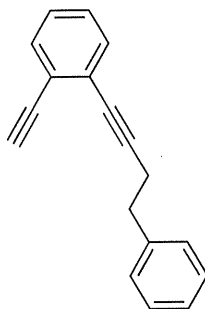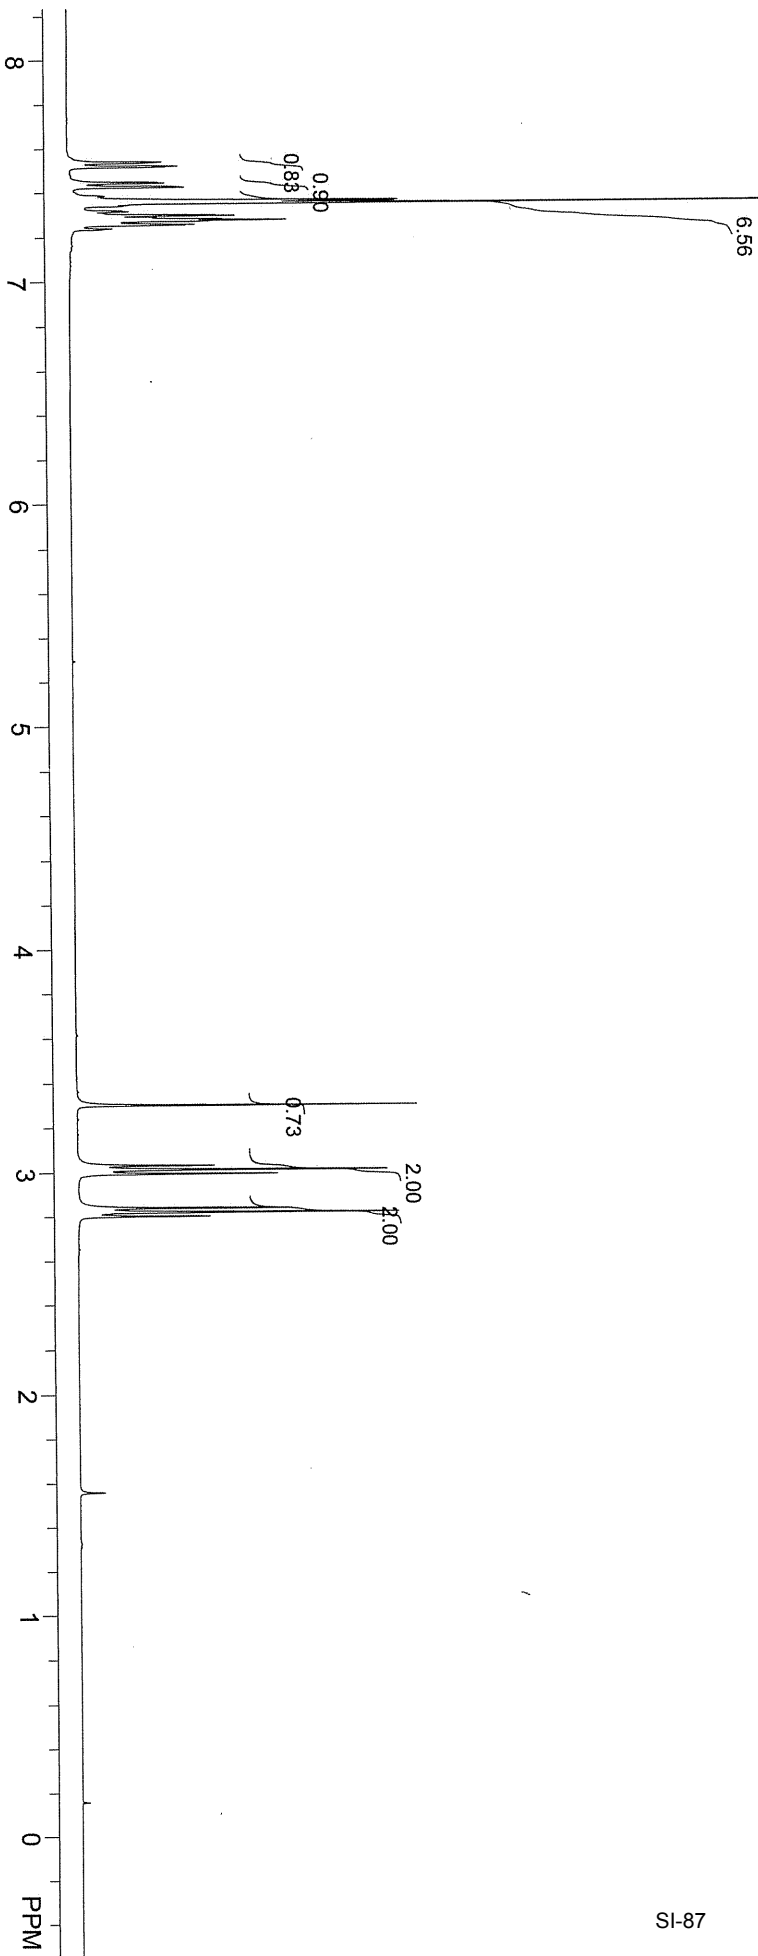

C:\Users\zhanglab\1\Desktop\NMR\Nus 20080731\DATA\yw-5-163-s-c.fid

yw-5-163-s-c  
Apr 18 2011

USER:

SOLVENT: cdcl3

Experiment = s2pul

Pulse length = 7.775 usec

Relaxation delay = 1.300 sec

NA = 106

Solvent = cdcl3

FID PTS1d = 28040

PTS1d = 32768

F1 = 100.577232 MHz

F2 = 399.950684 MHz

SW1 = 28040.66 Hz

AT1 = 1.00 sec

Hz per Pt 1sID = 0.86 Hz

SW2 = 1.00 Hz

Hz per Pt 2ndD = 1.00 Hz

O1 = 10044.3818 Hz

O2 = -0.5000 Hz

LB1 = 2.00 Hz

TP A = -36.56

B = 15.47

C = 0.00

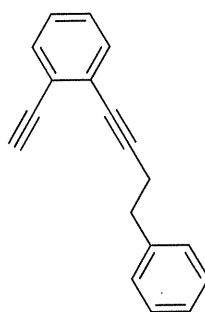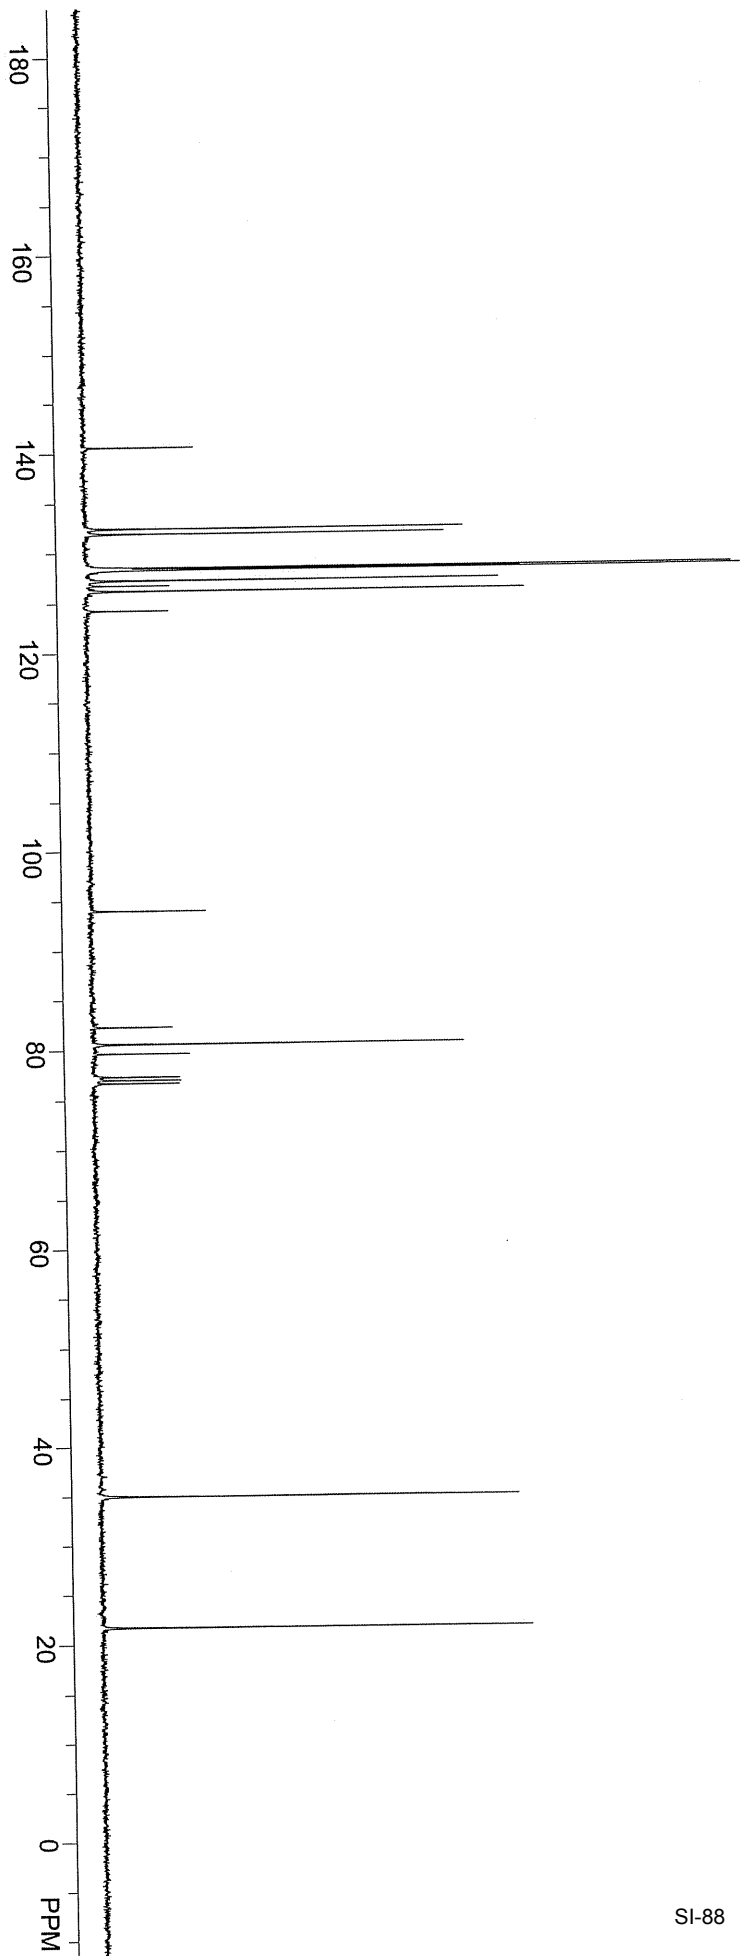



C:\Users\zhanglab\1\Desktop\NMR\Ntus 20080731\DATA\5y\w-5-152-Cl-h.fid

Apr 14 2011

USER:

SOLVENT: cdcl3

Experiment = s2pul

Pulse length = 11.663 usec

Relaxation delay = 4.800 sec

NA = 8

Solvent = cdcl3

FID PTS1d = 20006

PTS1d = 32768

F1 = 399.950684 MHz

F2 = 100.575279 MHz

SW1 = 8002.40 Hz

AT1 = 2.50 sec

Hz per Pt 1stD = 0.24 Hz

SW2 = 1.00 Hz

Hz per Pt 2ndD = 1.00 Hz

O1 = 2006.2362 Hz

O2 = -0.5000 Hz

LB1 = 0.00 Hz

TP A = -45.74

B = -36.00

C = 0.00

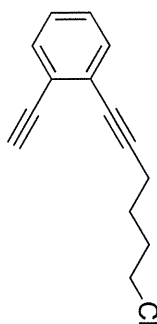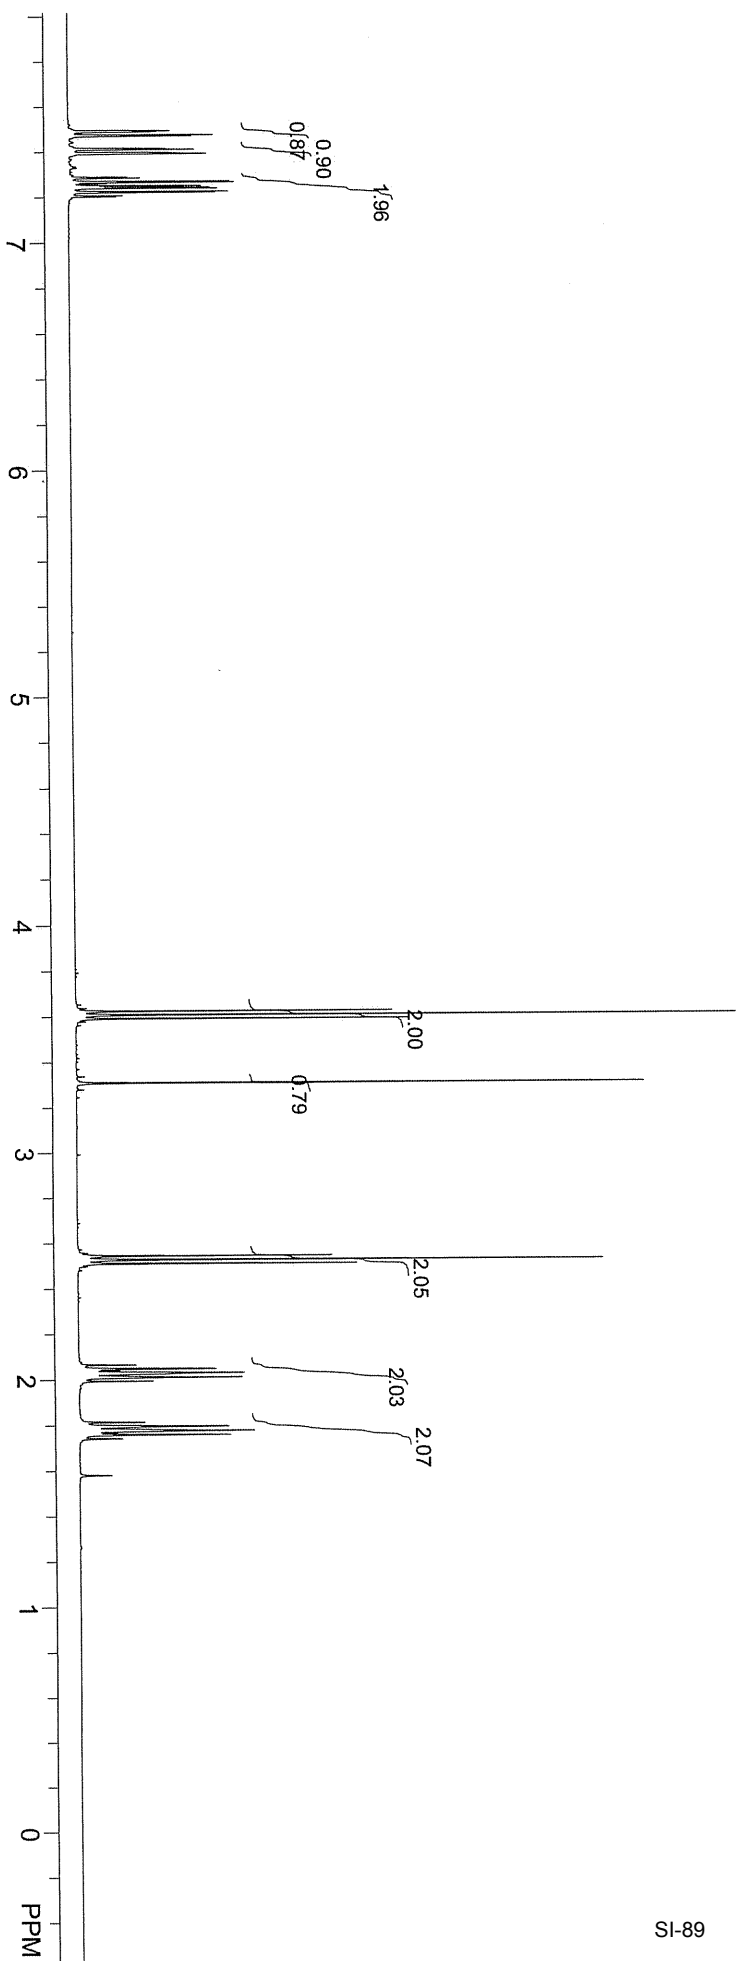

C:\Users\zhanglab1\Desktop\NMR\Ntus 20080731\DATA\\$y\w-5-152-C1-c1.fid  
y\w-5-152-C1-c

Apr 14 2011

USER:

SOLVENT: cdcl3

Experiment = s2pul

Pulse length = 7.775 usec

Relaxation delay = 1.300 sec

NA = 78

Solvent = cdcl3

FID PTS: id = 28040

PTS: id = 32768

F1 = 100.577232 MHz

F2 = 399.950684 MHz

SW1 = 28040.66 Hz

AT1 = 1.00 sec

Hz per Pt 1stD = 0.86 Hz

SW2 = 1.00 Hz

Hz per Pt 2ndD = 1.00 Hz

O1 = 10049.5156 Hz

O2 = -0.5000 Hz

LB1 = 2.00 Hz

TP A = -36.09

B = 18.28

C = 0.00

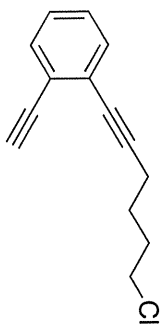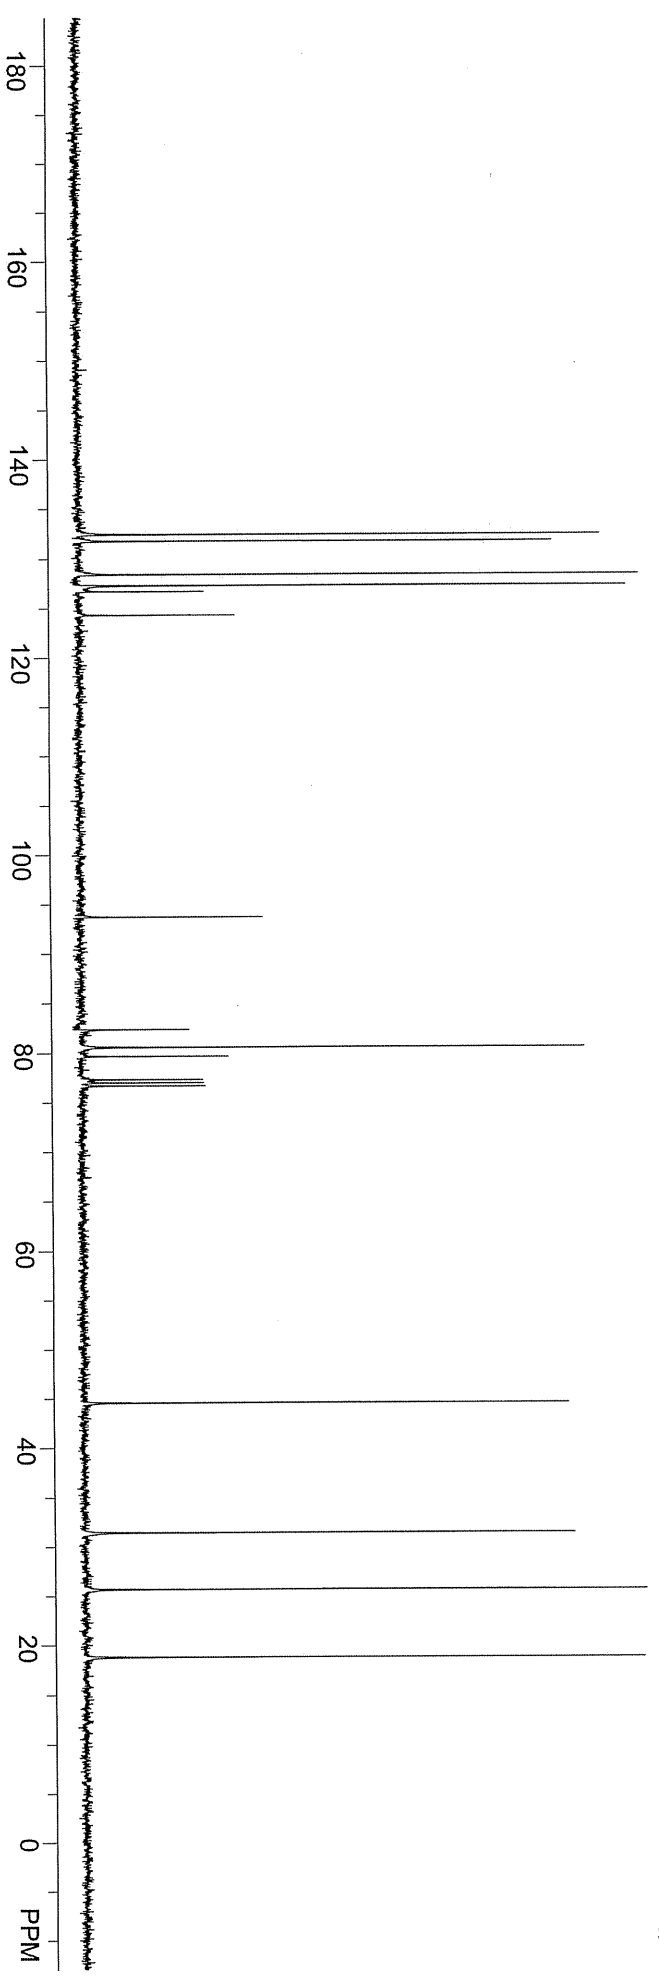

C:\Users\zhanglab1\Desktop\NMR\Ntus 20080731\DATA\5yw-5-150-h.fid  
new experiment

Apr 8 2011

USER:

SOLVENT: cdcl3

Experiment = s2pul

Pulse length = 11.663 usec

Relaxation delay = 4.800 sec

NA = 14

Solvent = cdcl3

FID PTS: id = 20006

PTS: id = 32768

F1 = 399.950684 MHz

F2 = 100.575279 MHz

SW1 = 8002.40 Hz

AT1 = 2.50 sec

Hz per Pt: 1stD = 0.24 Hz

SW2 = 1.00 Hz

Hz per Pt: 2ndD = 1.00 Hz

O1 = 2006.7504 Hz

O2 = -0.5000 Hz

LB1 = 0.00 Hz

TP A = -49.99

B = -36.87

C = 0.00

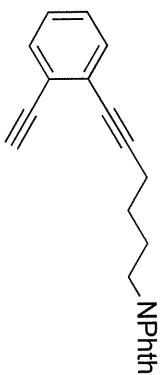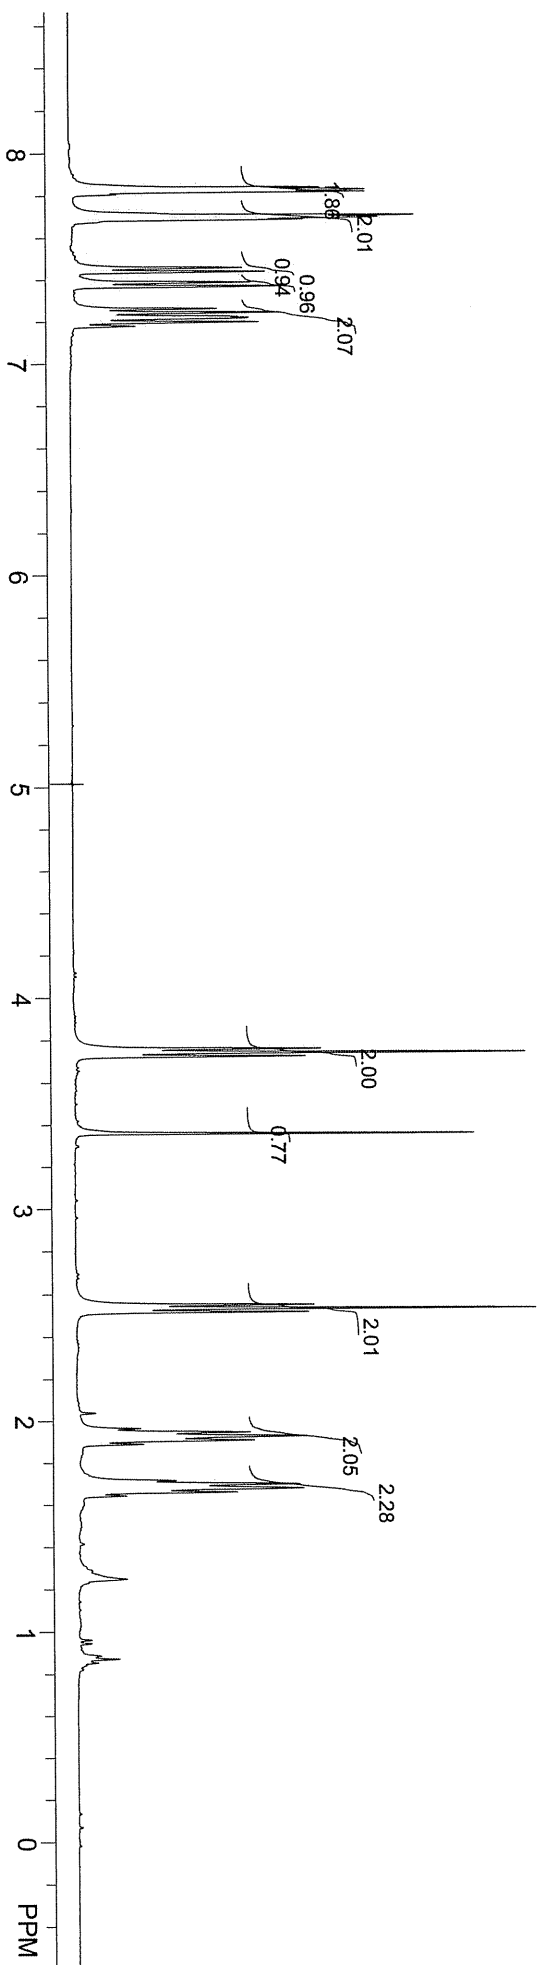

C:\Users\zhanglab1\Desktop\NMR\Ntus 20080731\DATA\yw-5-150-c1.fid

yw-5-150-c  
Apr 8 2011

USER:

SOLVENT: cdcl3

Experiment = s2pul

Pulse length = 7.775 usec

Relaxation delay = 1.300 sec

NA = 160

Solvent = cdcl3

FID PTS1d = 28040

PTS1d = 32768

F1 = 100.577232 MHz

F2 = 399.950684 MHz

SW1 = 28040.66 Hz

AT1 = 1.00 sec

Hz per Pt 1sID = 0.86 Hz

SW2 = 1.00 Hz

Hz per Pt 2ndD = 1.00 Hz

O1 = 10052.0830 Hz

O2 = -0.5000 Hz

LB1 = 2.00 Hz

TP A = -22.03

B = -1.41

C = 0.00

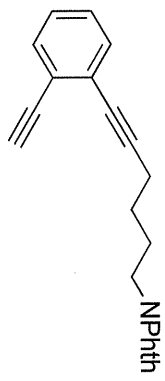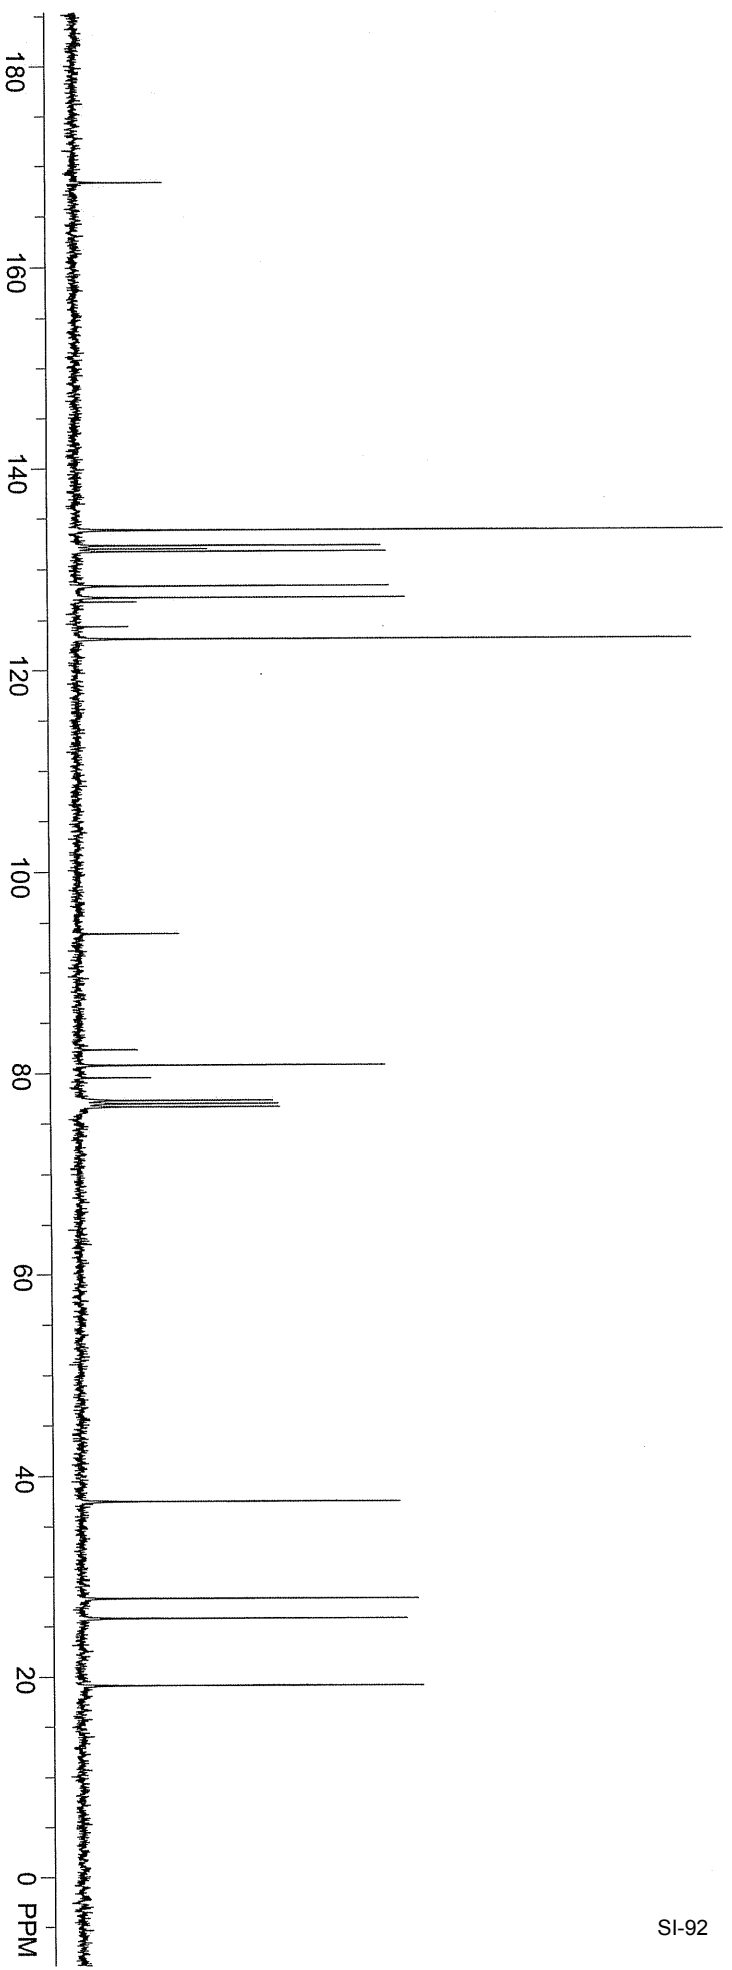

C:\Users\zhanglab1\Desktop\NMR\Ntus 20080731\DATA\5yw-5-191-OBn.fid

May 6 2011

USER:

SOLVENT: cddcl3

Experiment = s2pul

Pulse length = 11.663 usec

Relaxation delay = 4.800 sec

NA = 6

Solvent = cddcl3

FID.PTS1d = 20006

PTS1d = 32768

F1 = 399.950684 MHz

F2 = 100.575279 MHz

SW1 = 8002.40 Hz

AT1 = 2.50 sec

Hz per Pt 1SID = 0.24 Hz

SW2 = 1.00 Hz

Hz per Pt 2ndD = 1.00 Hz

O1 = 2006.7504 Hz

O2 = -0.5000 Hz

LB1 = 0.00 Hz

TP A = -37.27

B = -44.73

C = 0.00

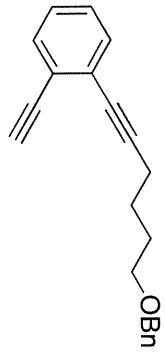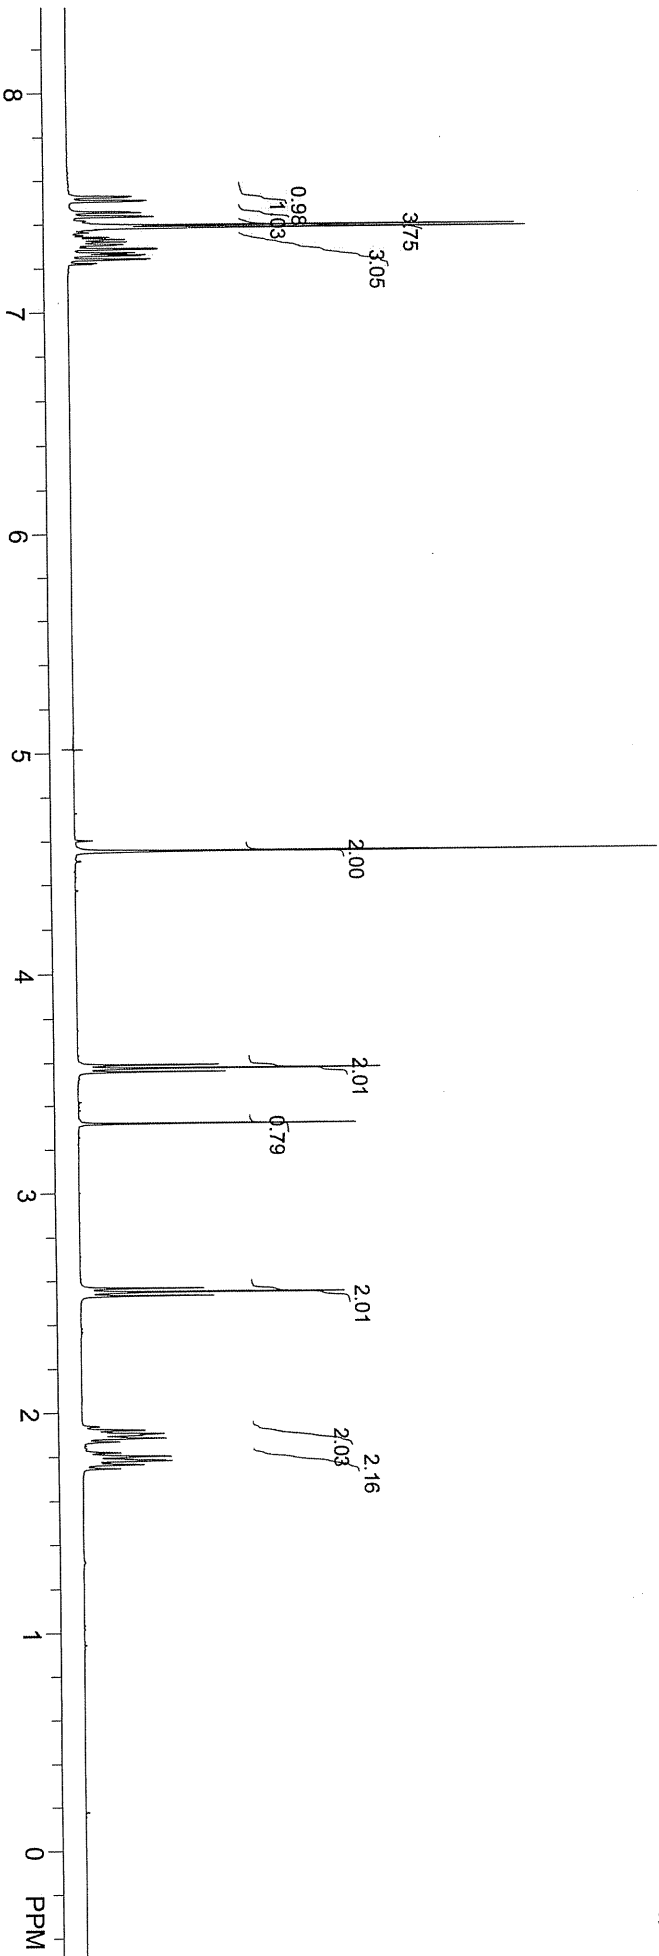

C:\Users\zhanglab1\Desktop\NMR\Ninus 20080731\DATA\yw-5-191-OBn-c1.fid  
Standard c13 run using qnp probe  
May 6 2011

USER:

SOLVENT: cdcl3  
Experiment = s2pul  
Pulse length = 7.775 usec  
Relaxation delay = 1.300 sec  
NA = 128

Solvent = cdcl3  
FID PTSid = 28040

PTSid = 32768

F1 = 100.577232 MHz

F2 = 399.950684 MHz

SW1 = 28040.66 Hz

AT1 = 1.00 sec

HZ per Pt 1stD = 0.86 Hz

SW2 = 1.00 Hz

HZ per Pt 2ndD = 1.00 Hz

O1 = 10039.2451 Hz

O2 = -0.5000 Hz

LB1 = 2.00 Hz

TP A = -37.50

B = 4.22

C = 0.00

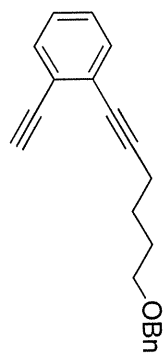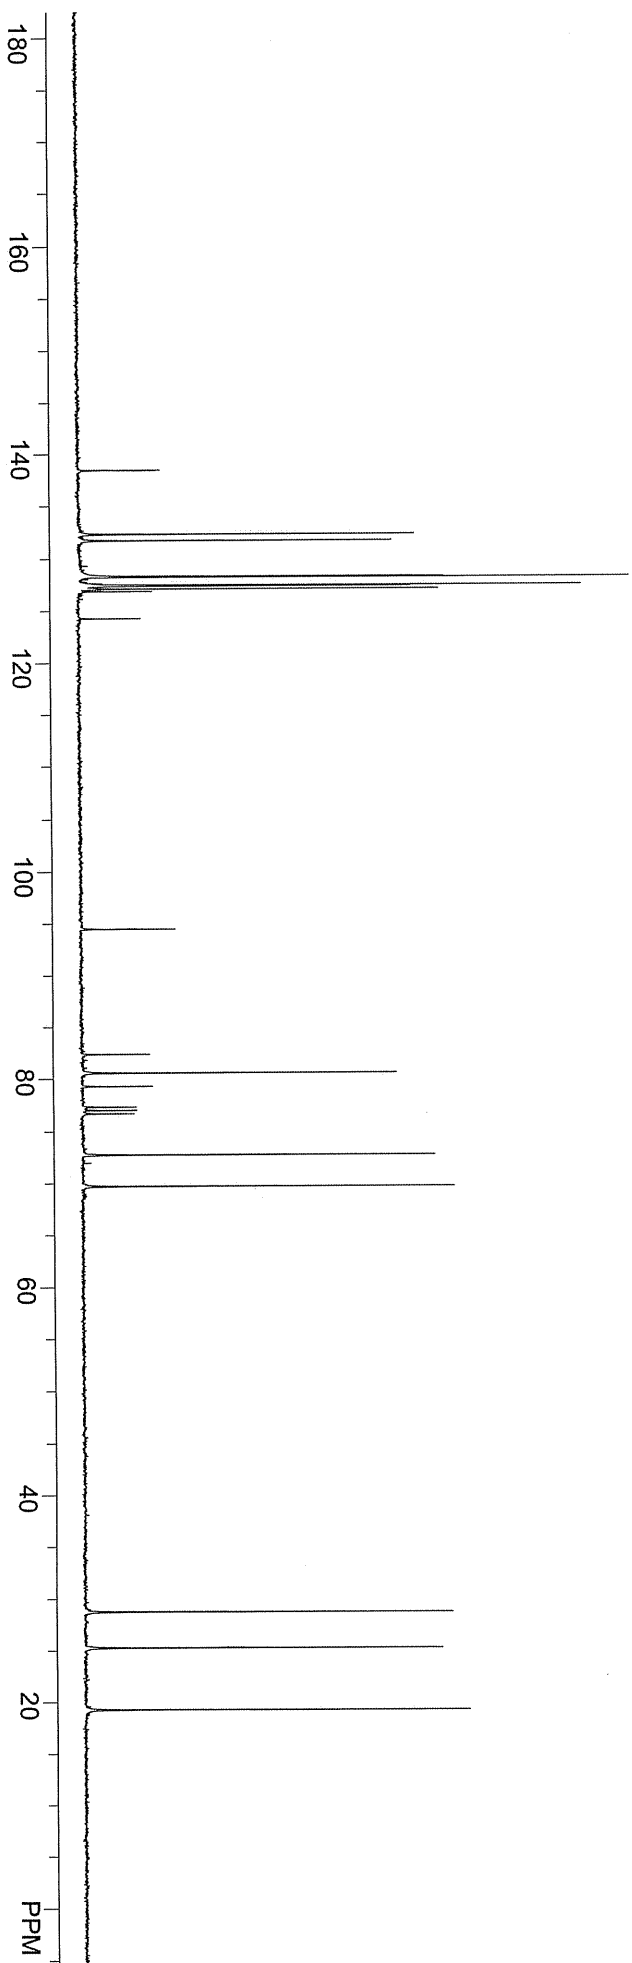

C:\Users\zhanglab1\Desktop\NMR\Ntus 20080731\DATA\5yiw-5-298-THP-s-h.fid  
new experiment  
Jun 1 2011

USER:  
SOLVENT: cdcl3  
Experiment = s2pul  
Pulse length = 11.663 usec  
Relaxation delay = 4.800 sec  
NA = 8

Solvent = cdcl3  
FID PTS1d = 20006  
PTS1d = 32768  
F1 = 399.950684 MHz  
F2 = 100.575279 MHz  
SW1 = 8002.40 Hz  
AT1 = 2.50 sec  
Hz per Pt 1stD = 0.24 Hz  
SW2 = 1.00 Hz  
Hz per Pt 2ndD = 1.00 Hz  
O1 = 2006.7504 Hz  
O2 = -0.5000 Hz  
LB1 = 0.00 Hz  
TP A = -44.83  
B = -33.79  
C = 0.00

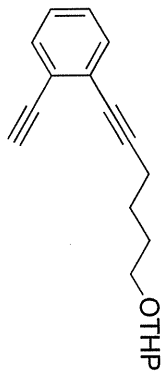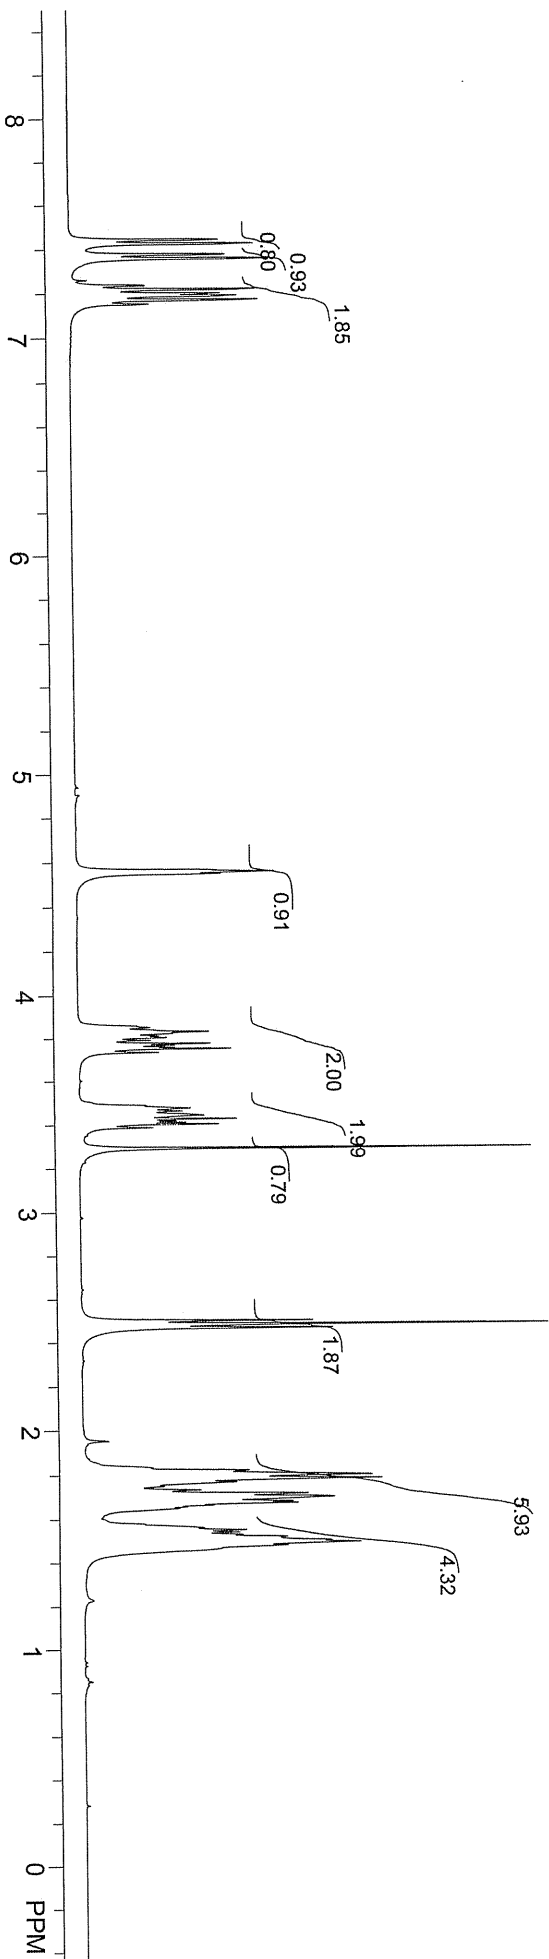

C:\Users\zhanglab1\Desktop\NMR\Ntus 20080731\DATA\5\w-5-298-THP-s-c2.fid  
Standard c13 run using qnp probe  
Jun 1 2011

USER:  
SOLVENT: cdcl3  
Experiment = s2pul  
Pulse length = 7.775 usec  
Relaxation delay = 1.300 sec  
NA = 112  
Solvent = cdcl3  
FID PTSid = 28040  
PTSid = 32768  
F1 = 100.577232 MHz  
F2 = 399.950684 MHz  
SW1 = 28040.66 Hz  
AT1 = 1.00 sec  
Hz per Pt1sid = 0.86 Hz  
SW2 = 1.00 Hz  
Hz per Pt2ndd = 1.00 Hz  
O1 = 10043.5234 Hz  
O2 = -0.5000 Hz  
LB1 = 2.00 Hz  
TP A = -13.13  
B = -16.88  
C = 0.00

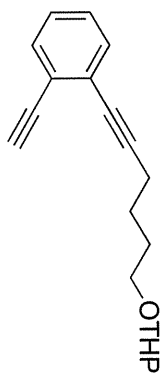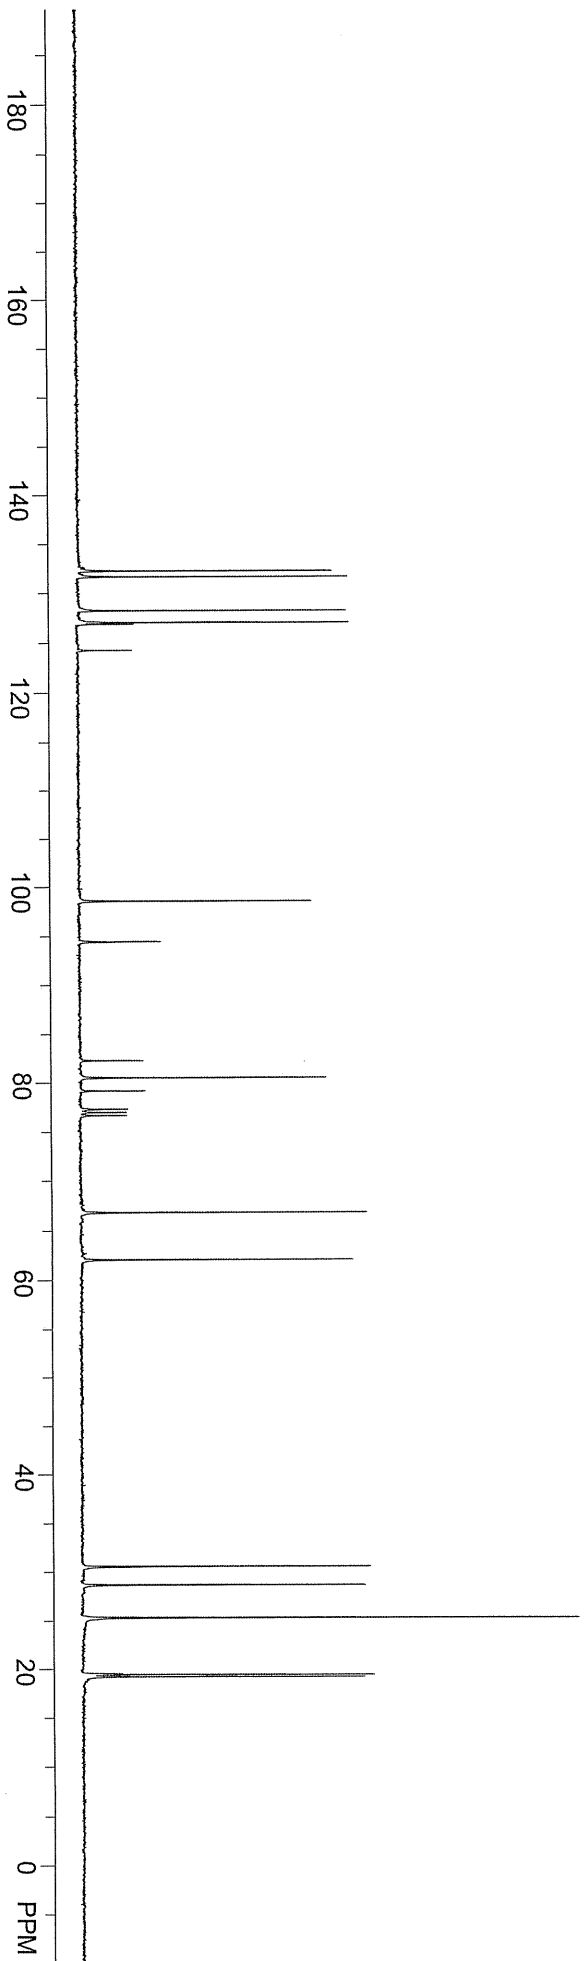



C:\Users\zhanglab1\Desktop\NMR\Ntus 20080731\DATA\yw-5-216-n1.fid

new experiment  
May 21 2011

USER:

SOLVENT: cdc13

Experiment = s2pul

Pulse length = 11.663 usec

Relaxation delay = 4.800 sec

NA = 6  
Solvent = cdc13

FID.PTS1d = 20006

PTS1d = 32768

F1 = 399.960684 MHz

F2 = 100.575279 MHz

SW1 = 8002.40 Hz

AT1 = 2.50 sec

Hz per Pt 1sid = 0.24 Hz

SW2 = 1.00 Hz

Hz per Pt 2ndd = 1.00 Hz

O1 = 2006.7504 Hz

O2 = -0.5000 Hz

LB1 = 0.00 Hz

TP A = -38.53

B = -45.16

C = 0.00

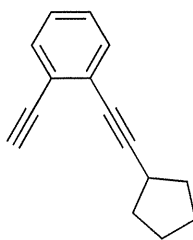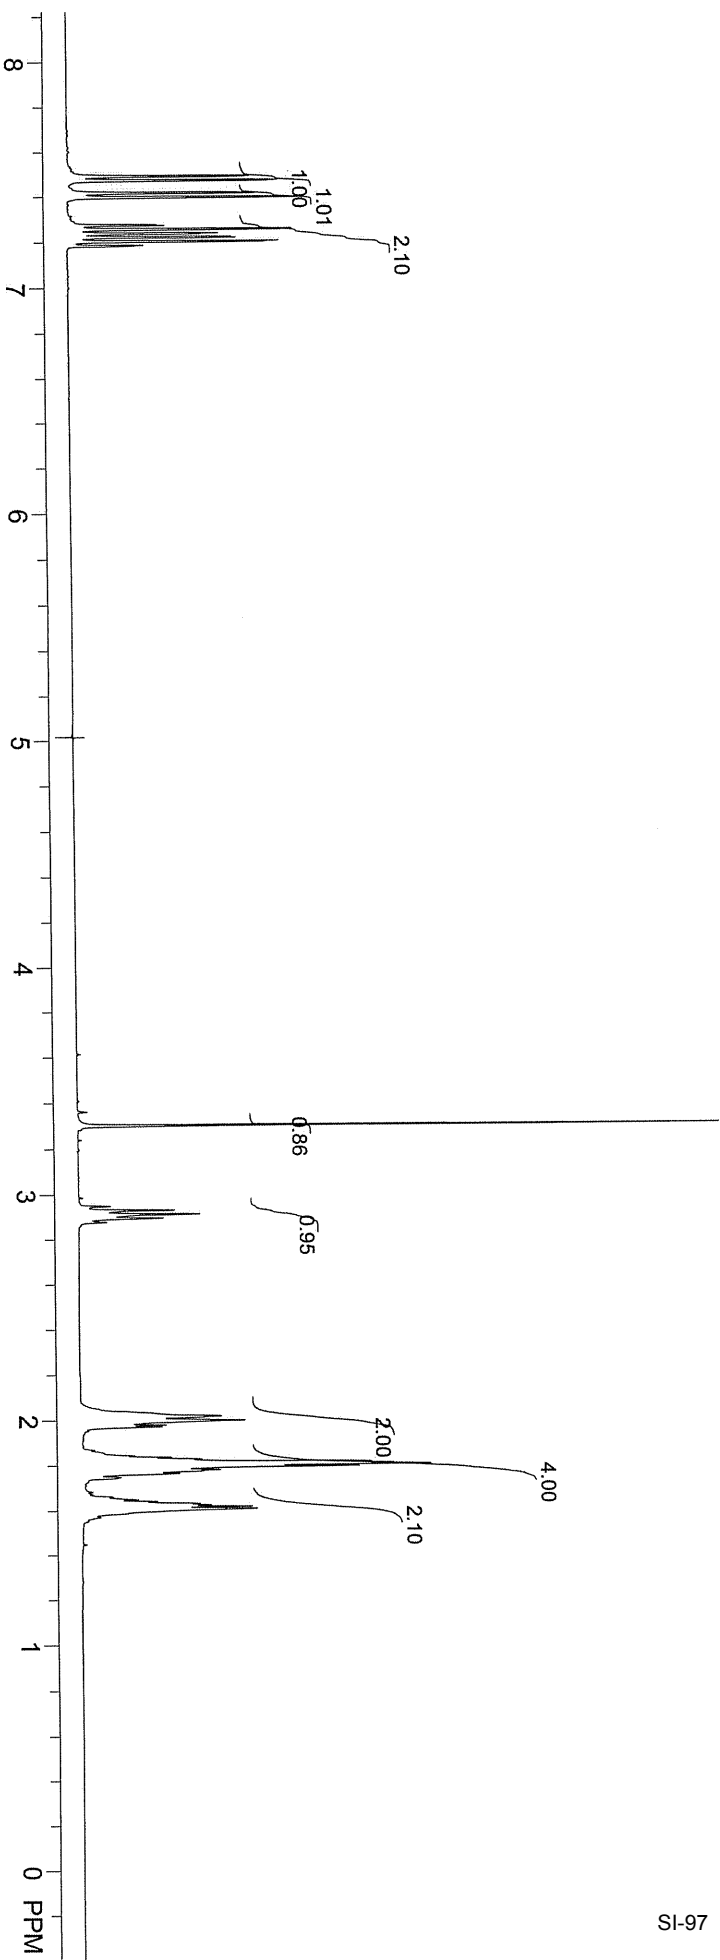

C:\Users\zhanglab1\Desktop\NMR\Ninus 20080731\DATA\5-216-c1.fid  
Standard c13 run using qnp probe  
May 21 2011

USER:

SOLVENT: cdcl3

Experiment = s2pul

Pulse length = 7.775 usec

Relaxation delay = 1.300 sec

NA = 76

Solvent = cdcl3

FID PTS:1d = 28040

PTS:1d = 32768

F1 = 100.577232 MHz

F2 = 399.950684 MHz

SW1 = 28040.66 Hz

AT1 = 1.00 sec

Hz per Pt 1stD = 0.86 Hz

SW2 = 1.00 Hz

Hz per Pt 2ndD = 1.00 Hz

O1 = 10046.9473 Hz

O2 = -0.5000 Hz

LB1 = 2.00 Hz

TP A = -20.63

B = -11.25

C = 0.00

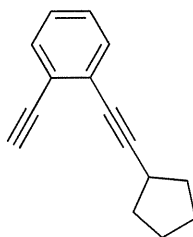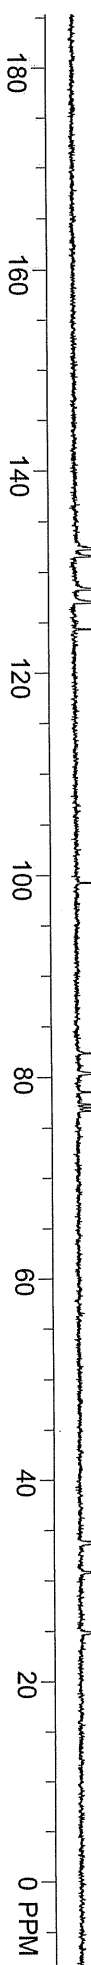

C:\Users\zhanglab1\Desktop\NMR\Ntus 20080731\DATA\5w-5-217-4h.fid

new experiment  
May 20 2011

USER:

SOLVENT: cdcl3

Experiment = s2pul

Pulse length = 11.663 usec

Relaxation delay = 4.800 sec

NA = 16

Solvent = cdcl3

FID PTS1d = 20006

PTS1d = 32768

F1 = 399.950684 MHz

F2 = 100.575279 MHz

SW1 = 8002.40 Hz

AT1 = 2.50 sec

Hz per Pt 1stD = 0.24 Hz

SW2 = 1.00 Hz

Hz per Pt 2ndD = 1.00 Hz

O1 = 2006.7504 Hz

O2 = -0.5000 Hz

LB1 = 0.00 Hz

TP A = -43.93

B = -37.63

C = 0.00

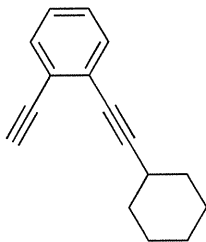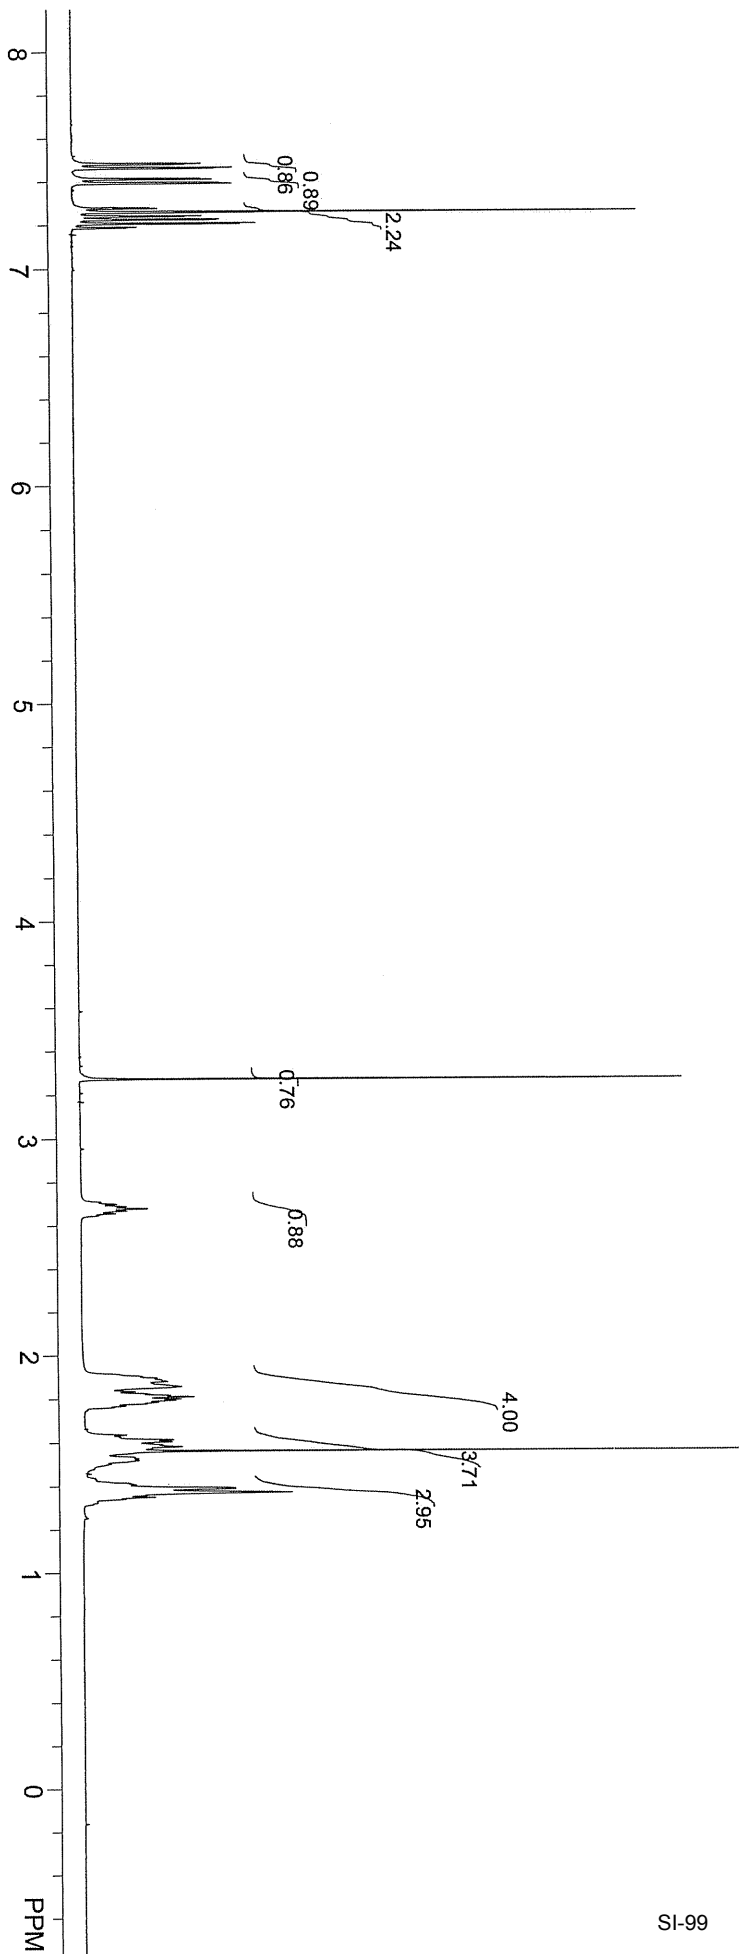

C:\Users\zhanglab1\Desktop\NMR\Ntus 20080731\DATA\5-217-s-c1.fid  
Standard c13 run using qnp probe  
May 20 2011

USER:  
SOLVENT: cdcl3  
Experiment = szpul  
Pulse length = 7.775 usec  
Relaxation delay = 1.300 sec  
NA = 102  
Solvent = cdcl3  
FID PTS1d = 28040  
PTS1d = 32768  
F1 = 100.577232 MHz  
F2 = 399.950684 MHz  
SW1 = 28040.66 Hz  
AT1 = 1.00 sec  
Hz per Pt 1stD = 0.86 Hz  
SW2 = 1.00 Hz  
Hz per Pt 2ndD = 1.00 Hz  
O1 = 10052.0820 Hz  
O2 = -0.5000 Hz  
LB1 = 2.00 Hz  
TP A = -26.72  
B = 5.63  
C = 0.00

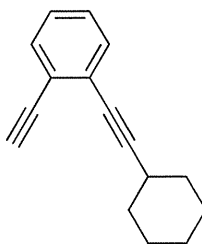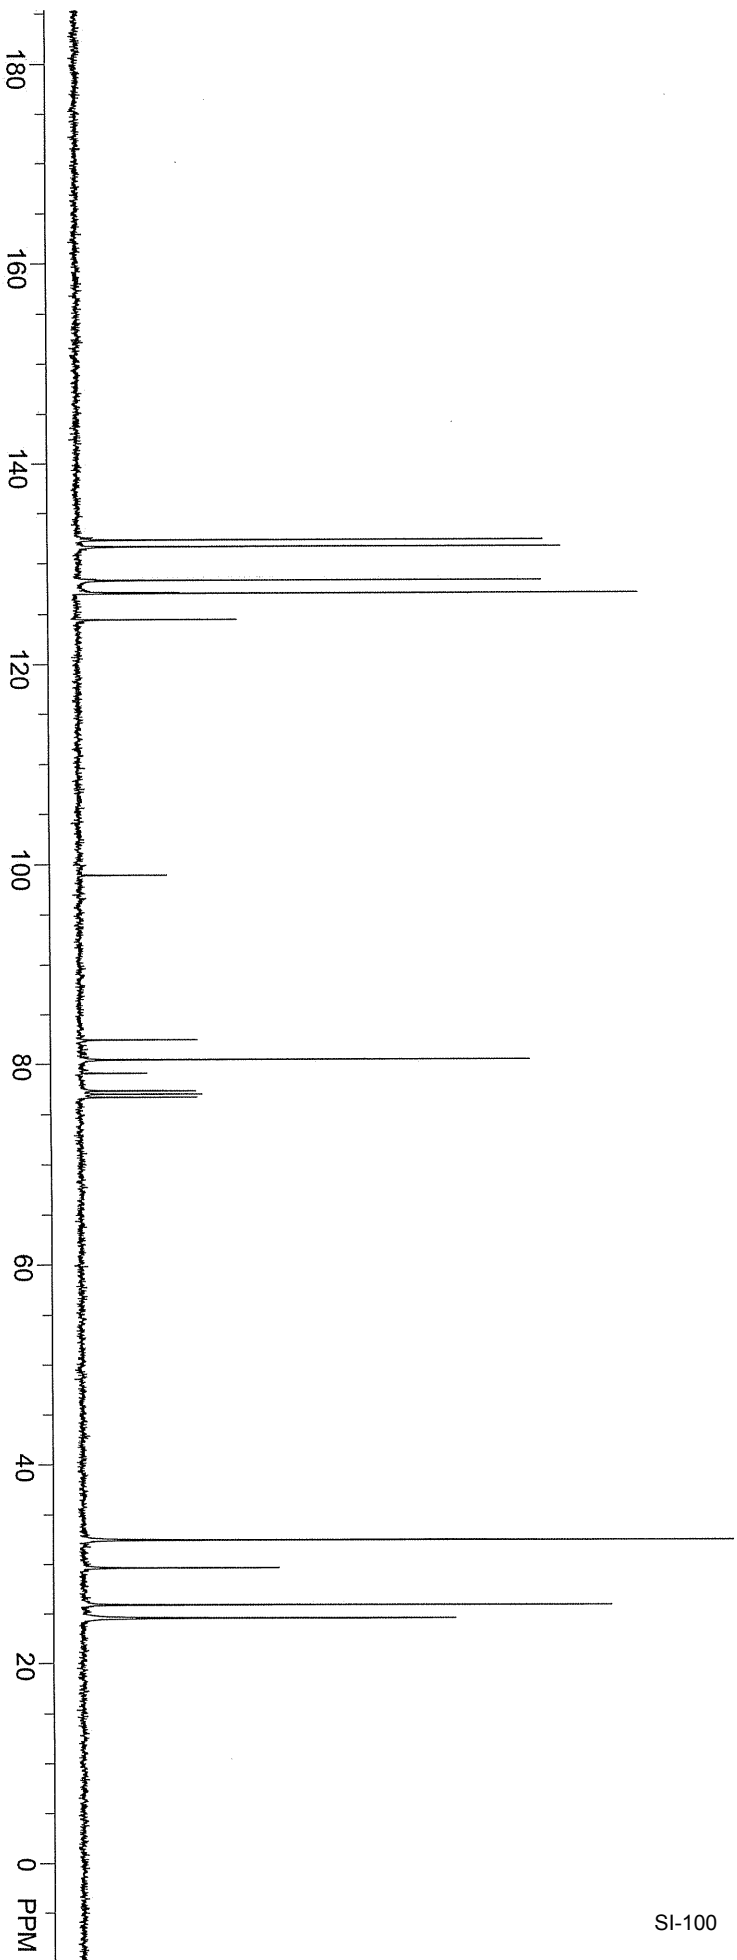

C:\Users\zhanglab\1\Desktop\NMR\Ntus 20080731\DATA\5jw-5-220-h-1.fid

new experiment  
May 27 2011

USER:

SOLVENT: cddcl3

Experiment = s2pul

Pulse length = 11.663 usec

Relaxation delay = 4.800 sec

NA = 8

Solvent = cddcl3

FID PTS1d = 20006

PTS1d = 32768

F1 = 399.950684 MHz

F2 = 100.575279 MHz

SW1 = 8002.40 Hz

AT1 = 2.50 sec

Hz per Pt 1stD = 0.24 Hz

SW2 = 1.00 Hz

Hz per Pt 2ndD = 1.00 Hz

O1 = 2006.7504 Hz

O2 = -0.5000 Hz

LB1 = 0.00 Hz

TP A = -38.62

B = -36.44

C = 0.00

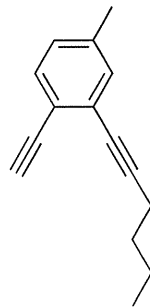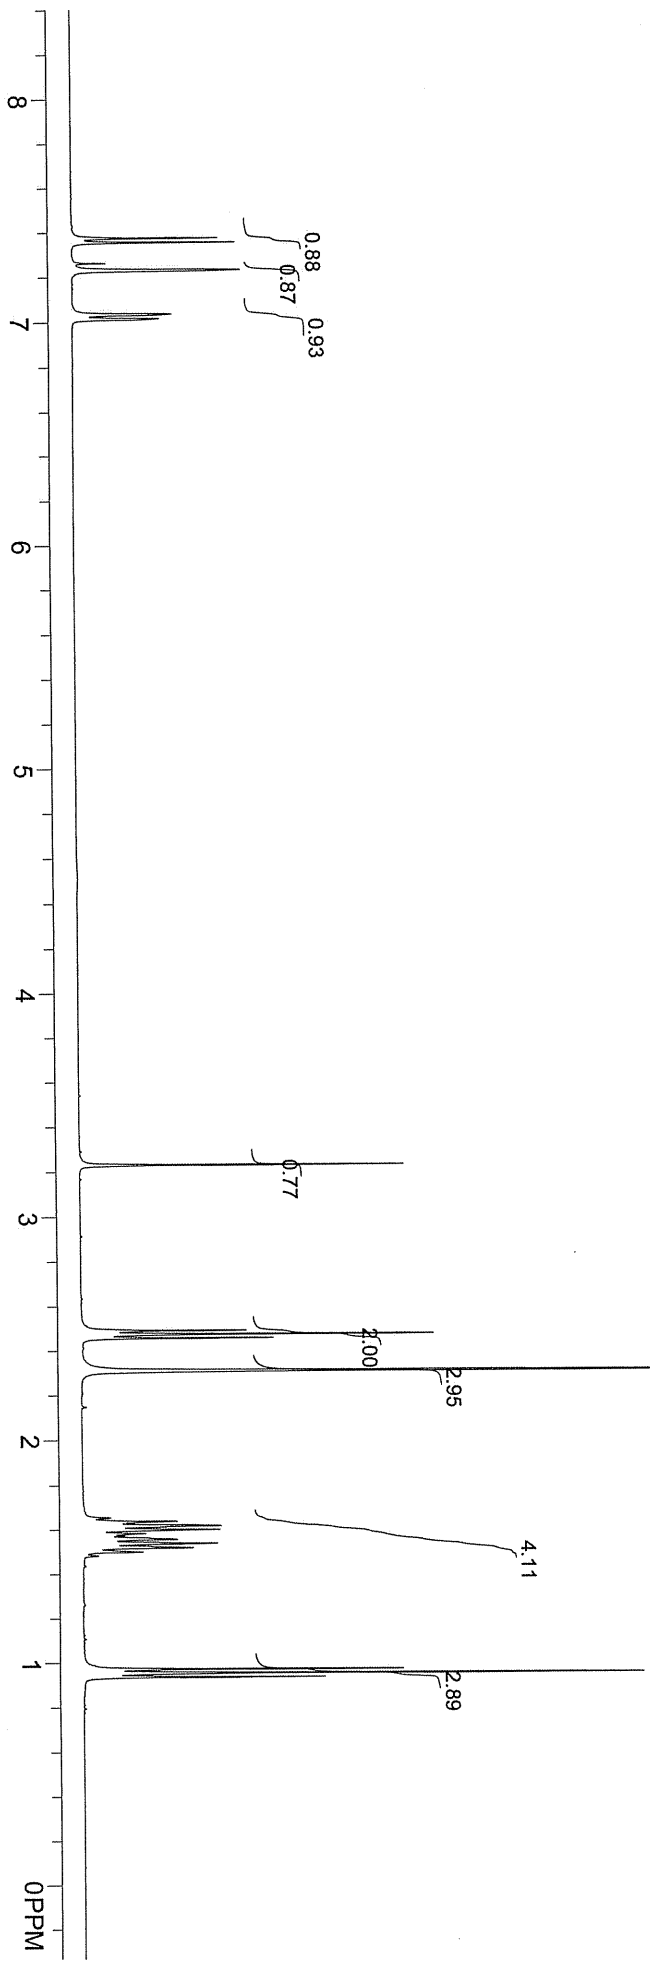

C:\Users\zhanglab1\Desktop\NMR\Ninus 20080731\DATA\5w-5-220-c2.fid  
Standard c13 run using qnp probe  
May 27 2011

USER:

SOLVENT: cdcl3

Experiment = s2pl

Pulse length = 7.775 usec

Relaxation delay = 1.300 sec

NA = 116

Solvent = cdcl3

FID PTS1d = 28040

PTS1d = 32768

F1 = 100.577232 MHz

F2 = 399.950684 MHz

SW1 = 28040.66 Hz

AT1 = 1.00 sec

Hz per Pt 1stD = 0.86 Hz

SW2 = 1.00 Hz

Hz per Pt 2ndD = 1.00 Hz

O1 = 10055.5039 Hz

O2 = -0.5000 Hz

LB1 = 2.00 Hz

TP A = -63.75

B = 39.38

C = 0.00

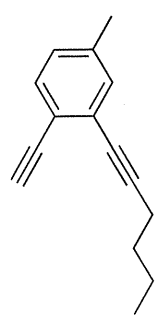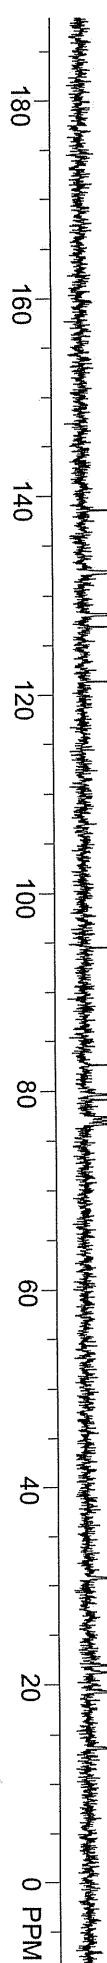

C:\Users\zhanglab1\Desktop\NMR\Ntus 20080731\DATA\yw-5-208-h.fid

new experiment  
May 16 2011

USER:

SOLVENT: cdcl3

Experiment = s2pul

Pulse length = 11.663 usec

Relaxation delay = 4.800 sec

NA = 12

Solvent = cdcl3

FID.PTS1d = 20006

PTS1d = 32768

F1 = 399.950684 MHz

F2 = 100.575279 MHz

SW1 = 8002.40 Hz

AT1 = 2.50 sec

Hz per Pt 1SID = 0.24 Hz

SW2 = 1.00 Hz

Hz per Pt 2ndD = 1.00 Hz

O1 = 2006.2362 Hz

O2 = -0.5000 Hz

LB1 = 0.00 Hz

TP A = -45.44

B = -28.81

C = 0.00

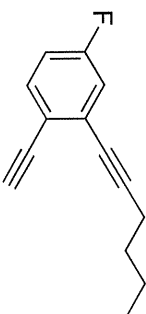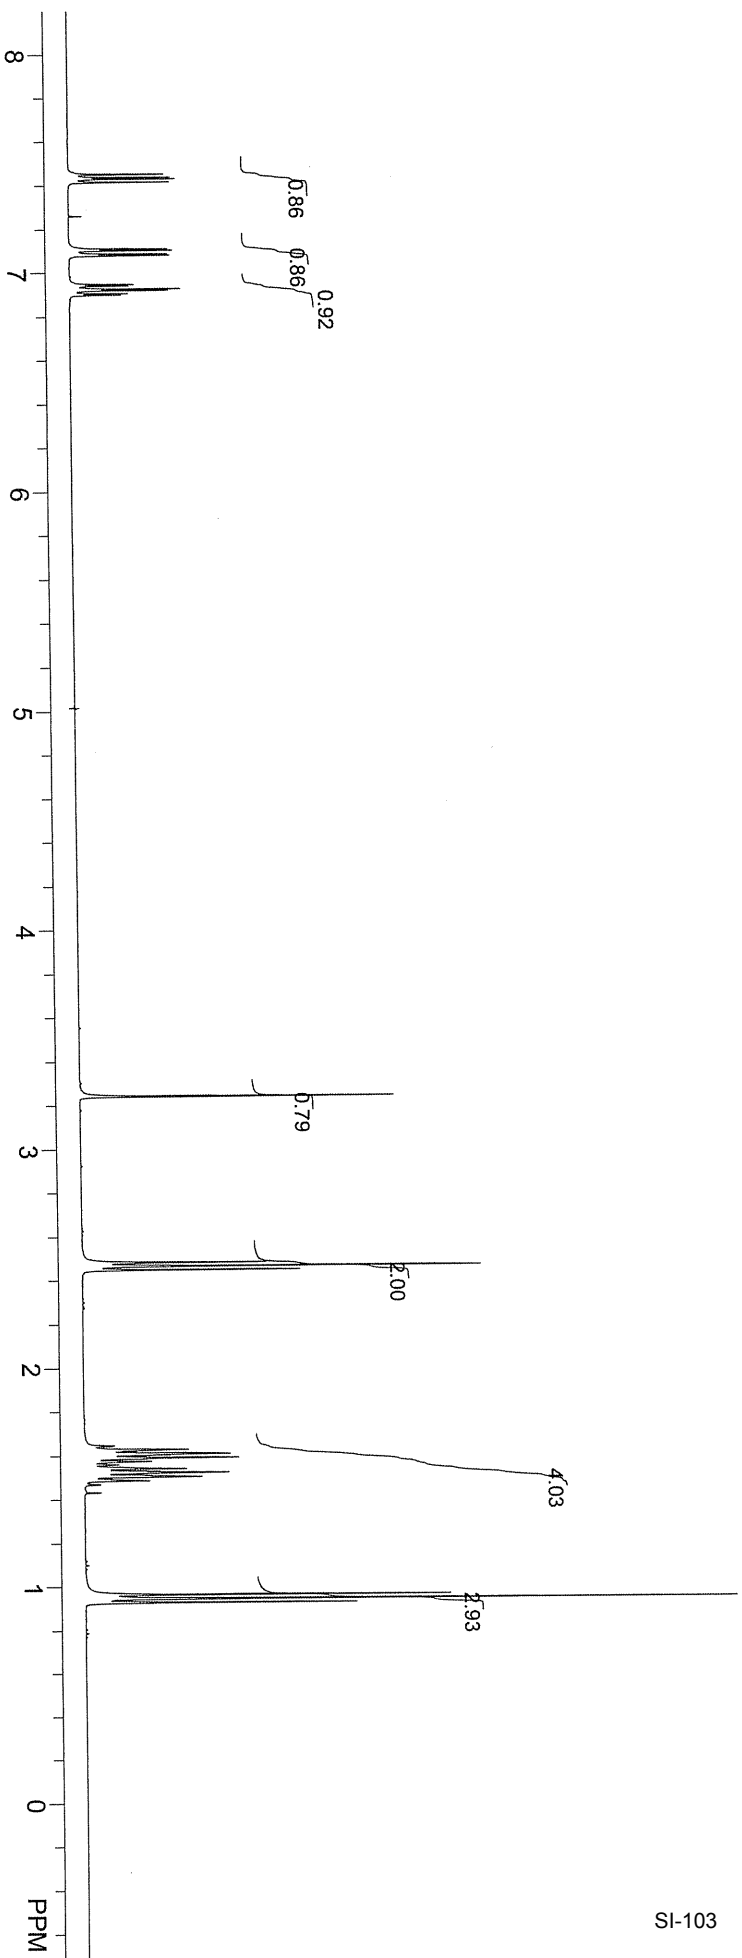

C:\Users\zhanglab1\Desktop\NMR\Ntus 20080731\DATA\5w-5-208-c1.fid  
Standard c13 run using qnp probe

May 16 2011

USER:

SOLVENT: cdcl3

Experiment = s2pul

Pulse length = 7.775 usec

Relaxation delay = 1.300 sec

NA = 146

Solvent = cdcl3

FID PTS1d = 28040

PTS1d = 32768

F1 = 100.577232 MHz

F2 = 399.350684 MHz

SW1 = 28040.66 Hz

AT1 = 1.00 sec

Hz per Pt 1stD = 0.86 Hz

SW2 = 1.00 Hz

Hz per Pt 2ndD = 1.00 Hz

O1 = 10053.7930 Hz

O2 = -0.5000 Hz

LB1 = 2.00 Hz

TP A = -37.97

B = 18.28

C = 0.00

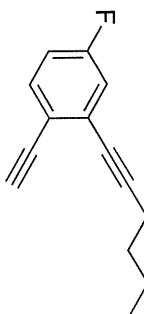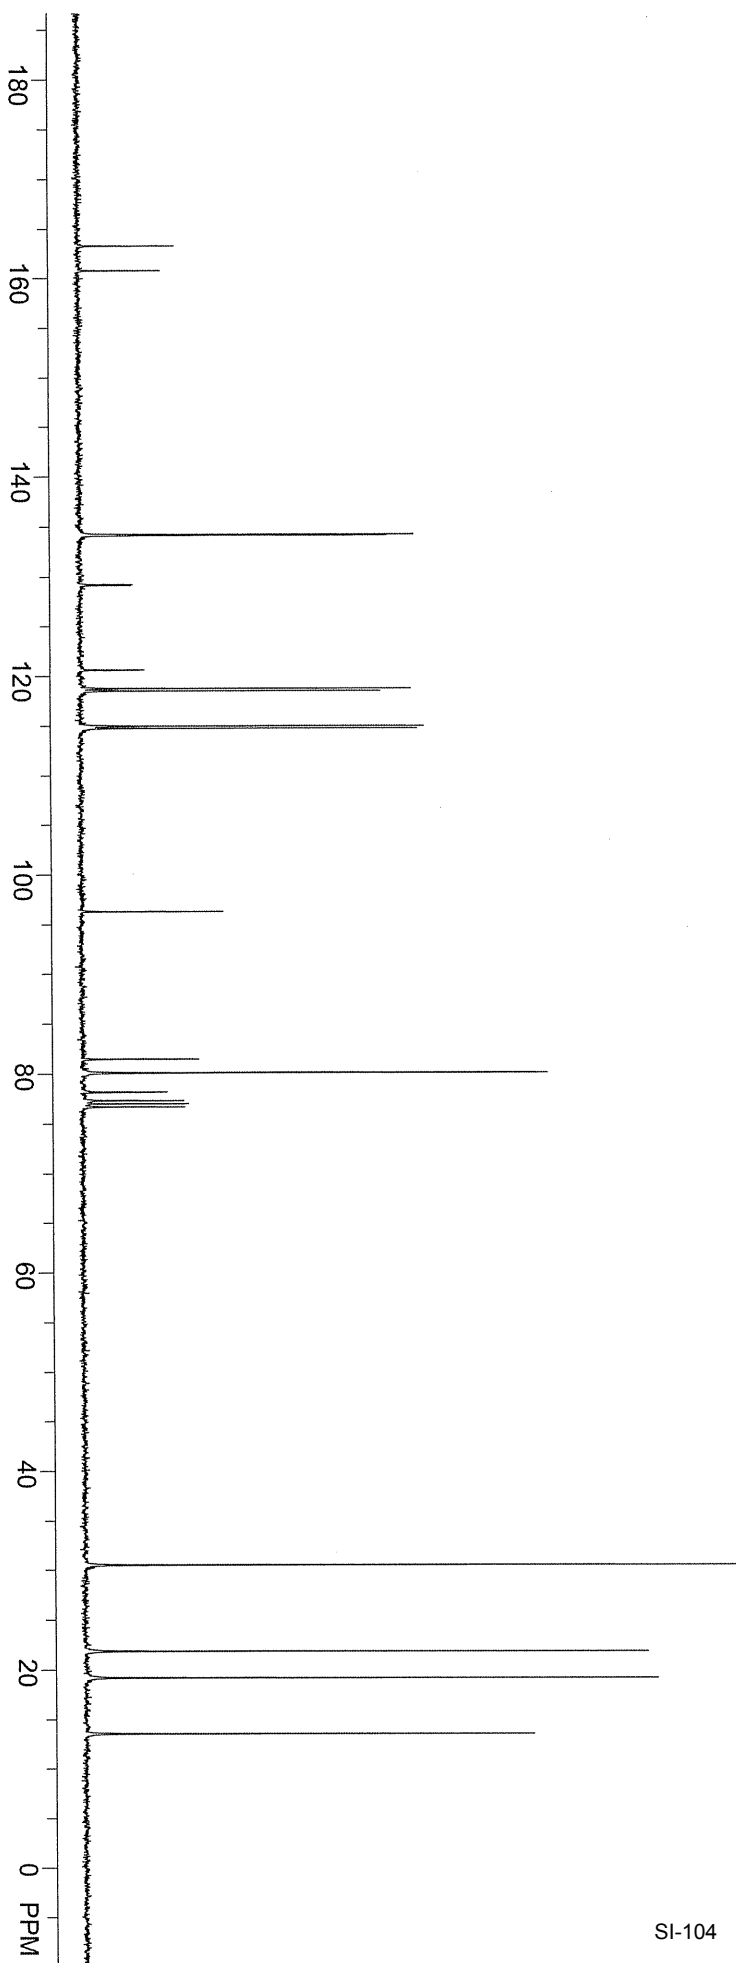



C:\Users\zhanglab1\Desktop\NMR\Ntus 20080731\DATA\yw-5-211-Cl-s-h.fid  
new experiment  
May 23 2011

USER:

SOLVENT: cdcl3  
Experiment = s2pul  
Pulse length = 11.663 usec  
Relaxation delay = 4.800 sec  
NA = 12

Solvent = cdcl3  
FID PTS1d = 20006  
PTS1d = 32768  
F1 = 399.960684 MHz  
F2 = 100.575279 MHz  
SW1 = 8002.40 Hz  
AT1 = 2.50 sec  
Hz per Pt 1stD = 0.24 Hz  
SW2 = 1.00 Hz  
Hz per Pt 2ndD = 1.00 Hz  
O1 = 2006.7504 Hz  
O2 = -0.5000 Hz  
LB1 = 0.00 Hz  
TP A = -50.77  
B = -27.39  
C = 0.00

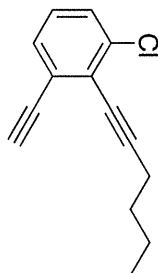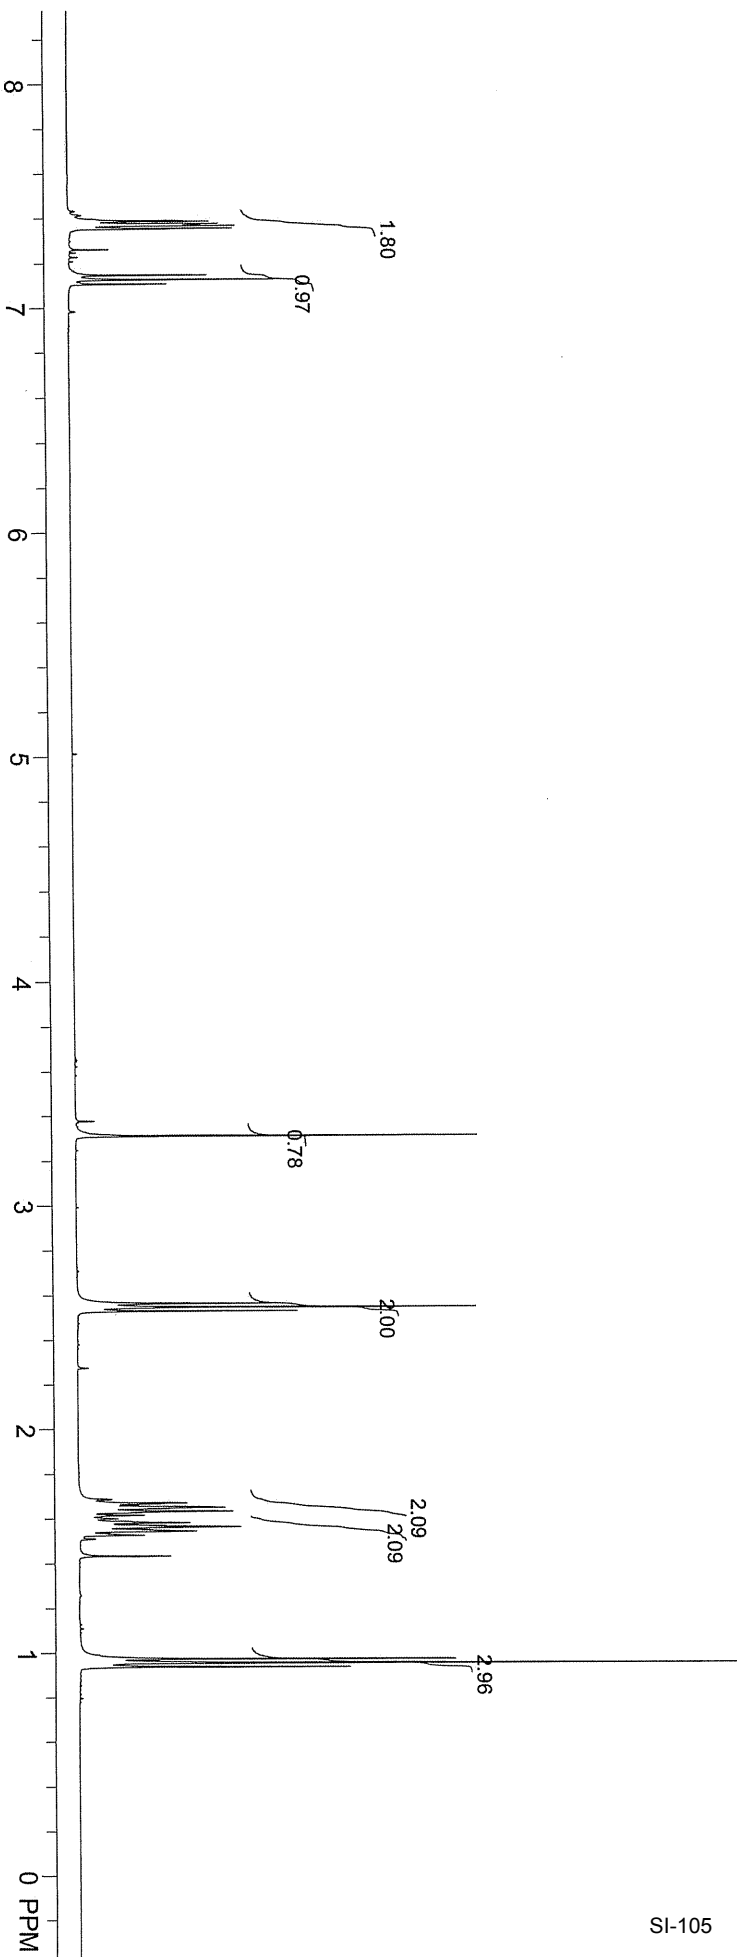

C:\Users\zhanglab1\Desktop\NMR\Nplus 20080731\DATA\5yw-5-211-Cl-s-c1.fid  
Standard c13 run using qnp probe  
May 23 2011  
USER:

SOLVENT: cdcl3  
Experiment = s2pul  
Pulse length = 7.775 usec  
Relaxation delay = 1.300 sec  
NA = 154  
Solvent = cdcl3  
FID.PTS1d = 28040  
PTS1d = 32768  
F1 = 100.577232 MHz  
F2 = 399.950684 MHz  
SW1 = 28040.66 Hz  
AT1 = 1.00 sec  
Hz per Pt 1sID = 0.86 Hz  
SW2 = 1.00 Hz  
Hz per Pt 2ndD = 1.00 Hz  
O1 = 10054.6484 Hz  
O2 = -0.5000 Hz  
LB1 = 2.00 Hz  
TP A = -31.41  
B = 12.66  
C = 0.00

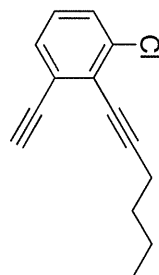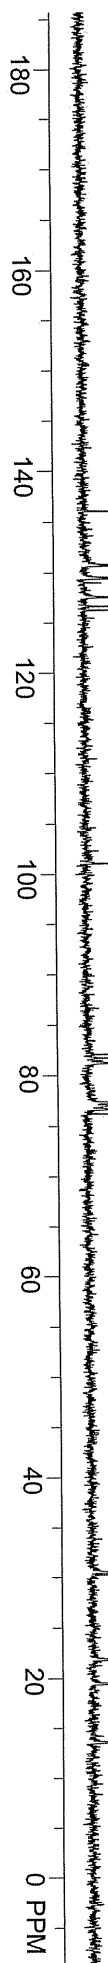

C:\Users\zhanglab1\Desktop\NMR\Ninus 20080731\DATA\yw-5-295-s-h.fid  
new experiment  
Jun 11 2011

USER:

SOLVENT: cdcl3  
Experiment = s2pul  
Pulse length = 11.663 usec  
Relaxation delay = 4.800 sec  
NA = 12

Solvent = cdcl3  
FID PTSid = 20006

PTSid = 32768

F1 = 399.950684 MHz  
F2 = 100.575279 MHz

SW1 = 8002.40 Hz

AT1 = 2.50 sec

Hz per Pt 1stD = 0.24 Hz

SW2 = 1.00 Hz

Hz per Pt 2ndD = 1.00 Hz

O1 = 2006.7504 Hz

O2 = -0.5000 Hz

LB1 = 0.00 Hz

TP A = -45.62

B = -37.92

C = 0.00

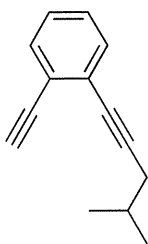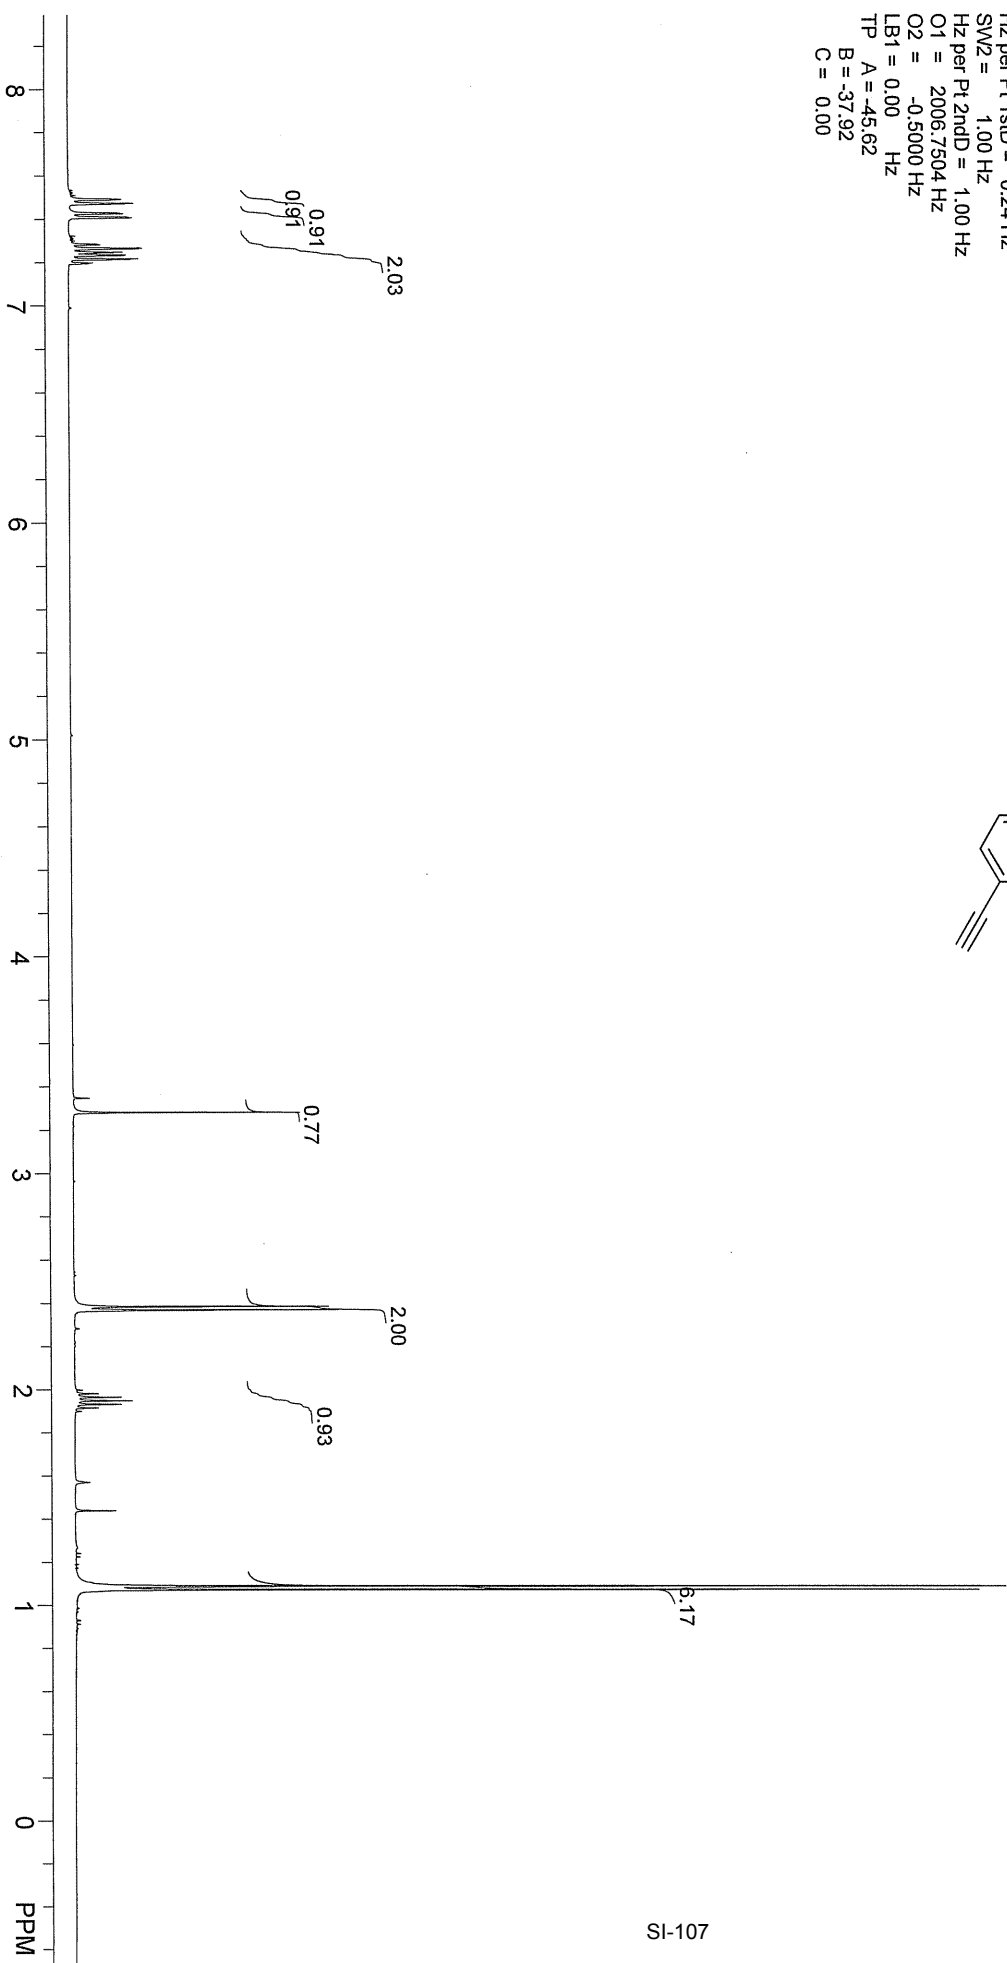

C:\Users\zhanglab1\Desktop\NMR\Ntus 20080731\DATA\5jw-5-295-s-c2.fid  
Standard c13 run using qnp probe  
Jun 11 2011

USER:

SOLVENT: cdcl3

Experiment = s2pul

Pulse length = 7.775 usec

Relaxation delay = 1.300 sec

NA = 102

Solvent = cdcl3

FID PTS1d = 28040

PTS1d = 32768

F1 = 100.577232 MHz

F2 = 399.950684 MHz

SW1 = 28040.66 Hz

AT1 = 1.00 sec

Hz per Pt 1stD = 0.86 Hz

SW2 = 1.00 Hz

Hz per Pt 2ndD = 1.00 Hz

O1 = 10053.7930 Hz

O2 = -0.5000 Hz

LB1 = 2.00 Hz

TP A = -31.88

B = 11.25

C = 0.00

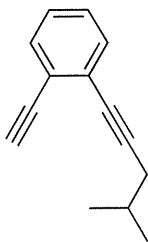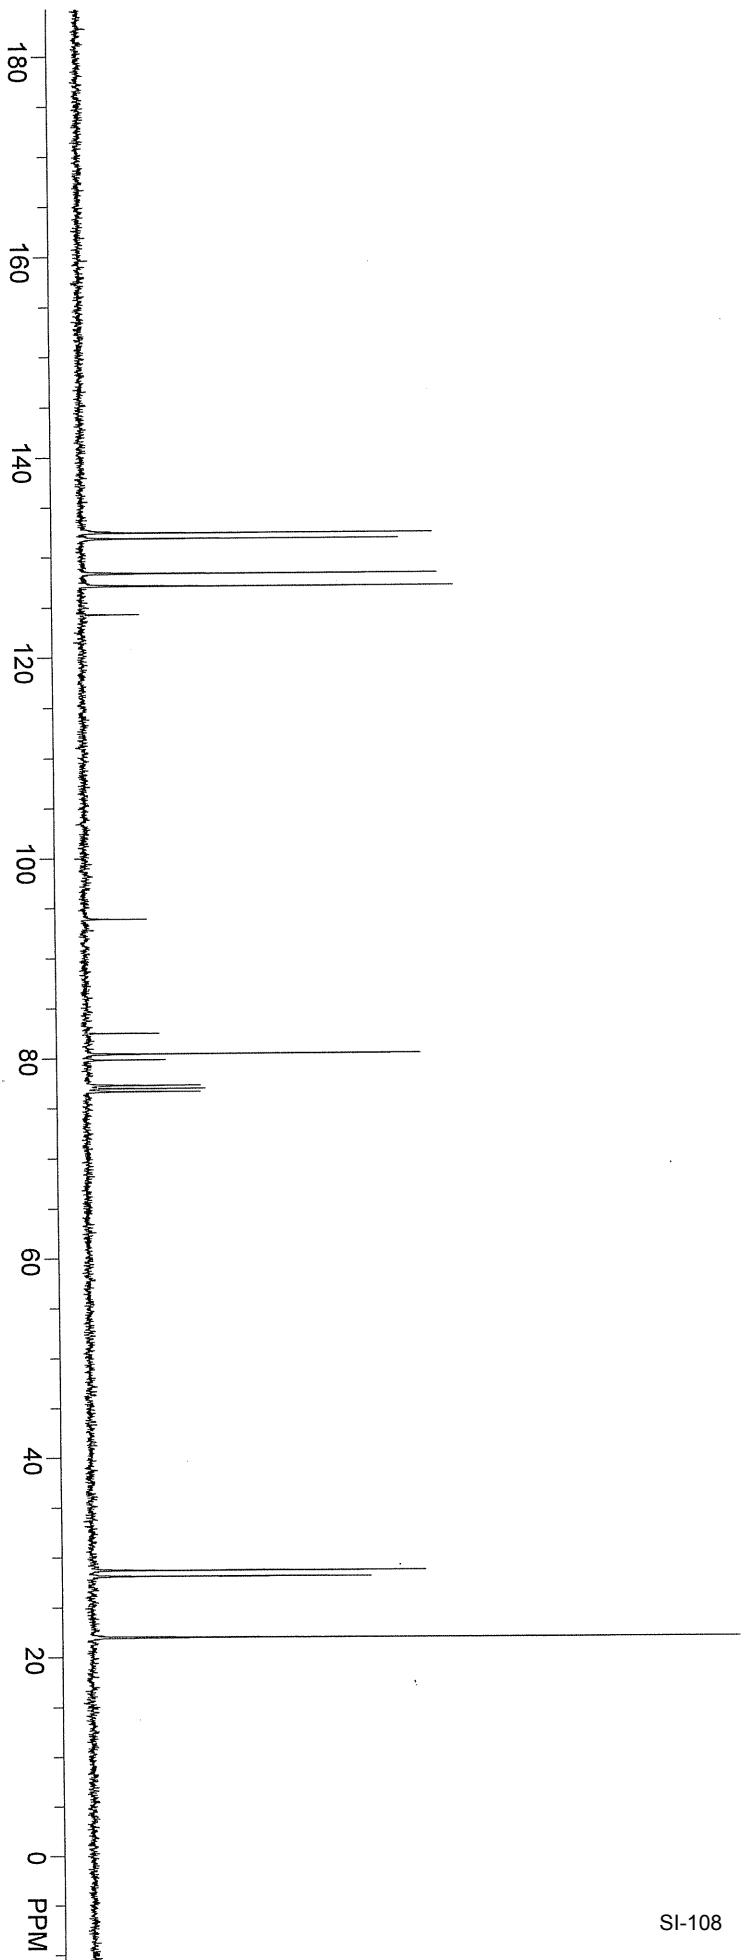

C:\Users\zhanglab1\Desktop\NMR\Linus 20080731\DATA\5jw-5-238-s.fid  
STANDARD PROTON PARAMETERS

Jun 9 2011

USER:

SOLVENT: cdcl3

Experiment = s2pul

Pulse length = 7.912 usec

Relaxation delay = 4.800 sec

NA = 16

Solvent = cdcl3

FID PTS1d = 20006

PTS1d = 32768

F1 = 499.858521 MHz

F2 = 125.700813 MHz

SW1 = 8002.40 Hz

AT1 = 2.50 sec

Hz per Pt 1sfd = 0.24 Hz

SW2 = 1.00 Hz

Hz per Pt 2ndd = 1.00 Hz

O1 = 2470.7119 Hz

O2 = -0.5000 Hz

LB1 = 0.00 Hz

TP A = 53.73

B = 0.53

C = 0.00

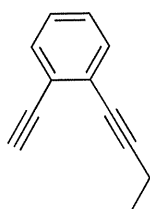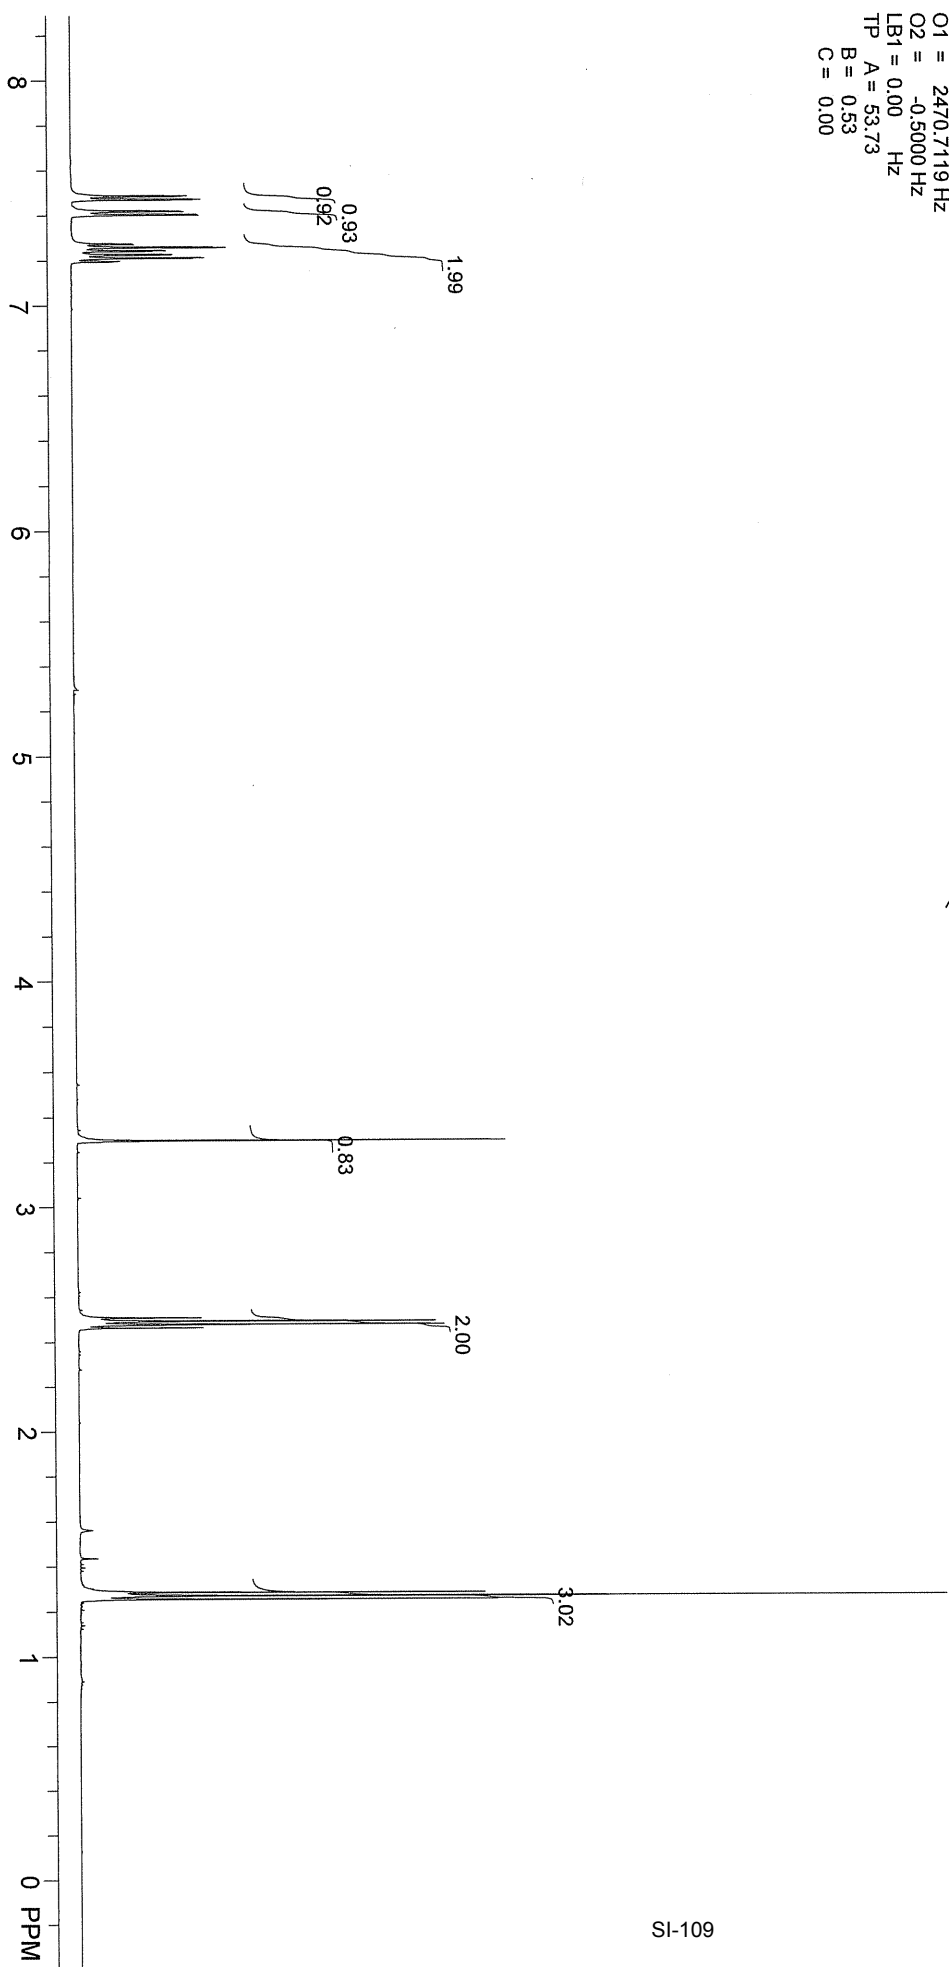

C:\Users\zhanglab1\Desktop\NMR\Nitus 20080731\DATA\5-238-s-c1.fid  
STANDARD CARBON PARAMETERS

Jun 9 2011

USER:

SOLVENT: cdcl3

Experiment = s2pul

Pulse length = 6.000 usec

Relaxation delay = 3.000 sec

NA = 90

Solvent = cdcl3

FID PTS1d = 36749

PTS1d = 65536

F1 = 125.701683 MHz

F2 = 499.858551 MHz

SW1 = 28258.57 Hz

AT1 = 1.30 sec

Hz per Pt 1s1D = 0.43 Hz

SW2 = 1.00 Hz

Hz per Pt 2ndD = 1.00 Hz

O1 = 12766.0713 Hz

O2 = -0.5000 Hz

LB1 = 2.00 Hz

TP A = 61.88

B = 167.34

C = 0.00

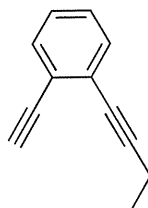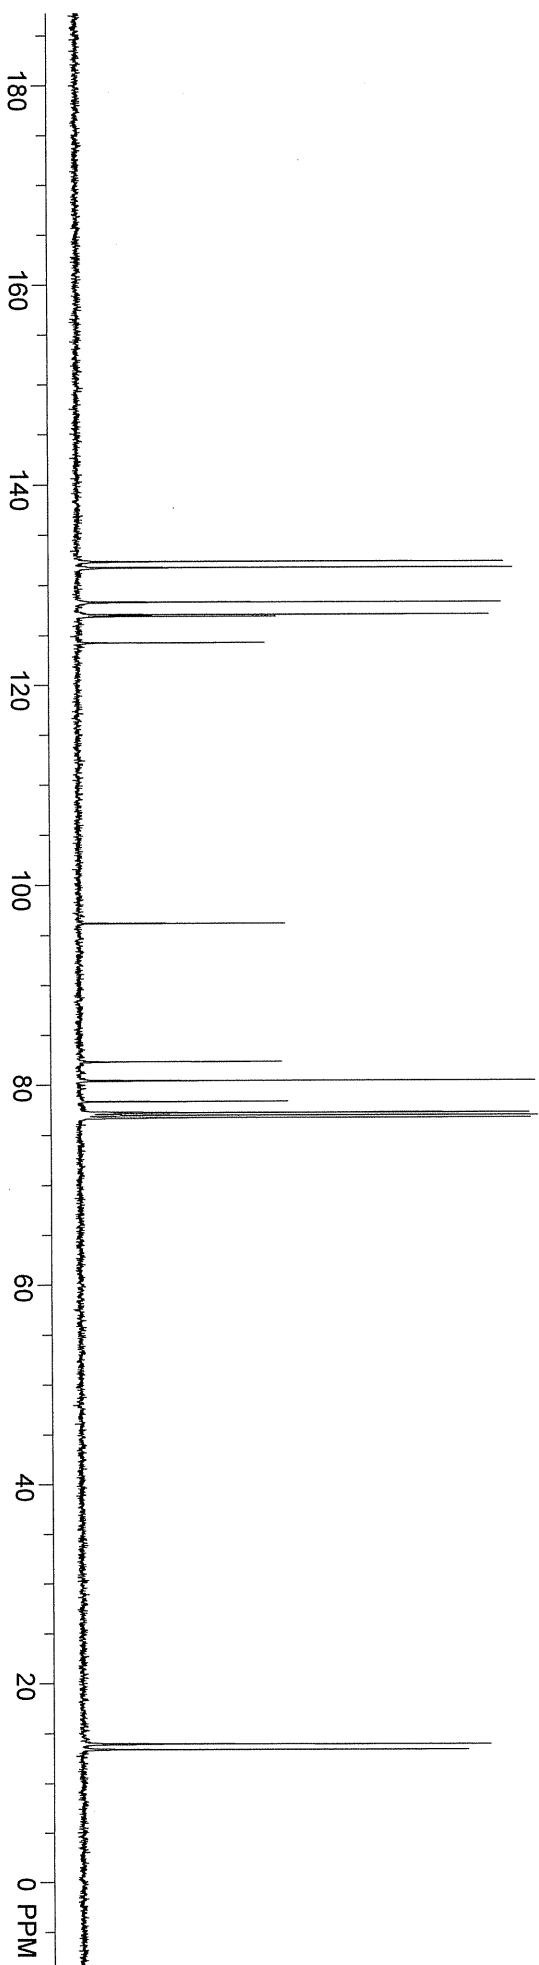

C:\Users\zhanglab1\Desktop\NMR\Ntus 20080731\DATA\5jw-5-189-s-h.fid

May 4 2011

USER:

SOLVENT: cdcl3

Experiment = s2pul

Pulse length = 11.663 usec

Relaxation delay = 4.800 sec

NA = 8

Solvent = cdcl3

FID PTS1d = 20006

PTS1d = 32768

F1 = 399.950684 MHz

F2 = 100.575279 MHz

SW1 = 8002.40 Hz

AT1 = 2.50 sec

Hz per Pt 1sid = 0.24 Hz

SW2 = 1.00 Hz

Hz per Pt 2ndd = 1.00 Hz

O1 = 2006.7504 Hz

O2 = -0.5000 Hz

LB1 = 0.00 Hz

TP A = -39.22

B = -45.70

C = 0.00

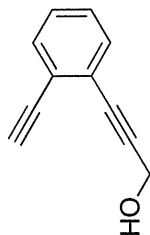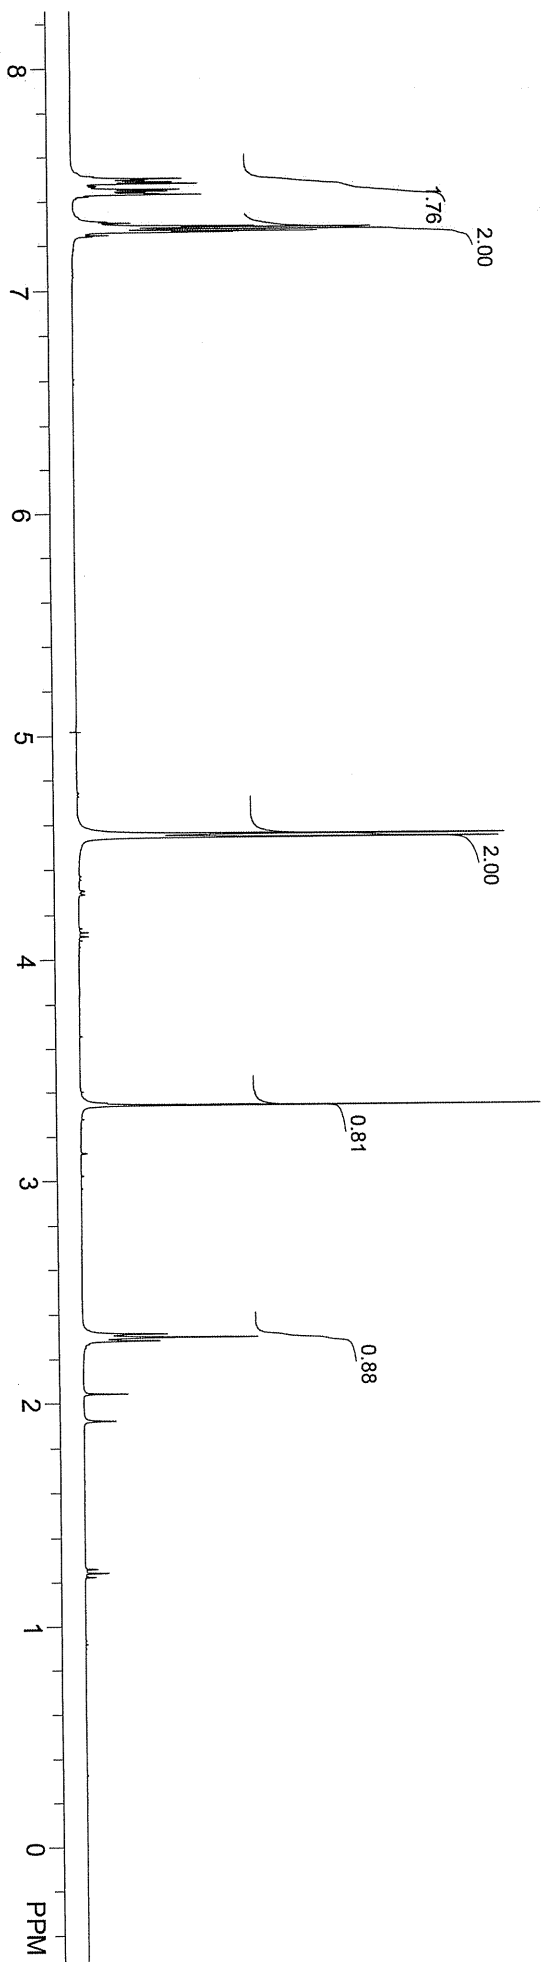

C:\Users\zhanglab1\Desktop\NMR\Ntus 20080731\DATA\5yw-5-189-s-c1.fid  
Standard c13 Run using qnp probe

May 4 2011

USER:

SOLVENT: cdcl3

Experiment = s2pul

Pulse length = 7.775 usec

Relaxation delay = 1.300 sec

NA = 108

Solvent = cdcl3

FID Pts1d = 28040

PTS1d = 32768

F1 = 100.577232 MHz

F2 = 399.950684 MHz

SW1 = 28040.66 Hz

AT1 = 1.00 sec

Hz per Pt 1std = 0.86 Hz

SW2 = 1.00 Hz

Hz per Pt 2ndd = 1.00 Hz

O1 = 10051.2256 Hz

O2 = -0.5000 Hz

LB1 = 2.00 Hz

TP A = -17.34

B = -36.56

C = 0.00

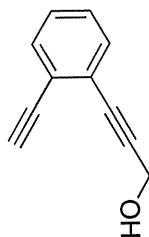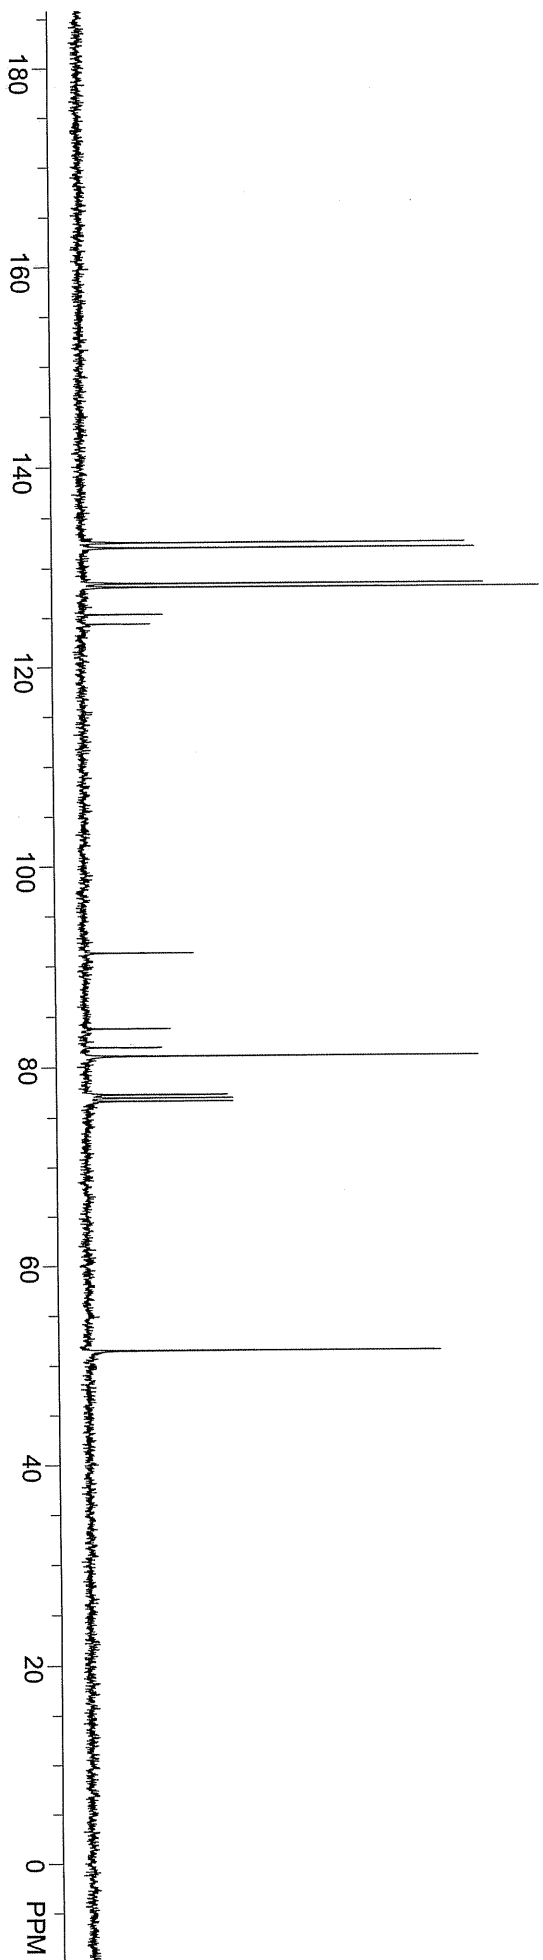



C:\Users\zhanglab1\Desktop\NMR\Nitus 20080731\DATA\5\yw-5-198-s-h.fid

May 10 2011

USER:

SOLVENT: CDCl3

Experiment = s2pul

Pulse length = 7.700 usec

Relaxation delay = 4.800 sec

Solvent = CDCl3

FID.PTS:1d = 21259

PTS:1d = 32768

F1 = 499.858551 MHz

F2 = 125.700813 MHz

SW1 = 8503.40 Hz

AT1 = 2.50 sec

Hz per Pt. 1SID = 0.26 Hz

SW2 = 1.00 Hz

Hz per Pt. 2nDD = 1.00 Hz

O1 = 2495.9019 Hz

O2 = -0.5000 Hz

LB1 = 0.00 Hz

TP A = 75.31

B = -11.07

C = 0.00

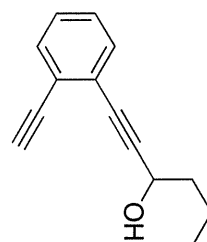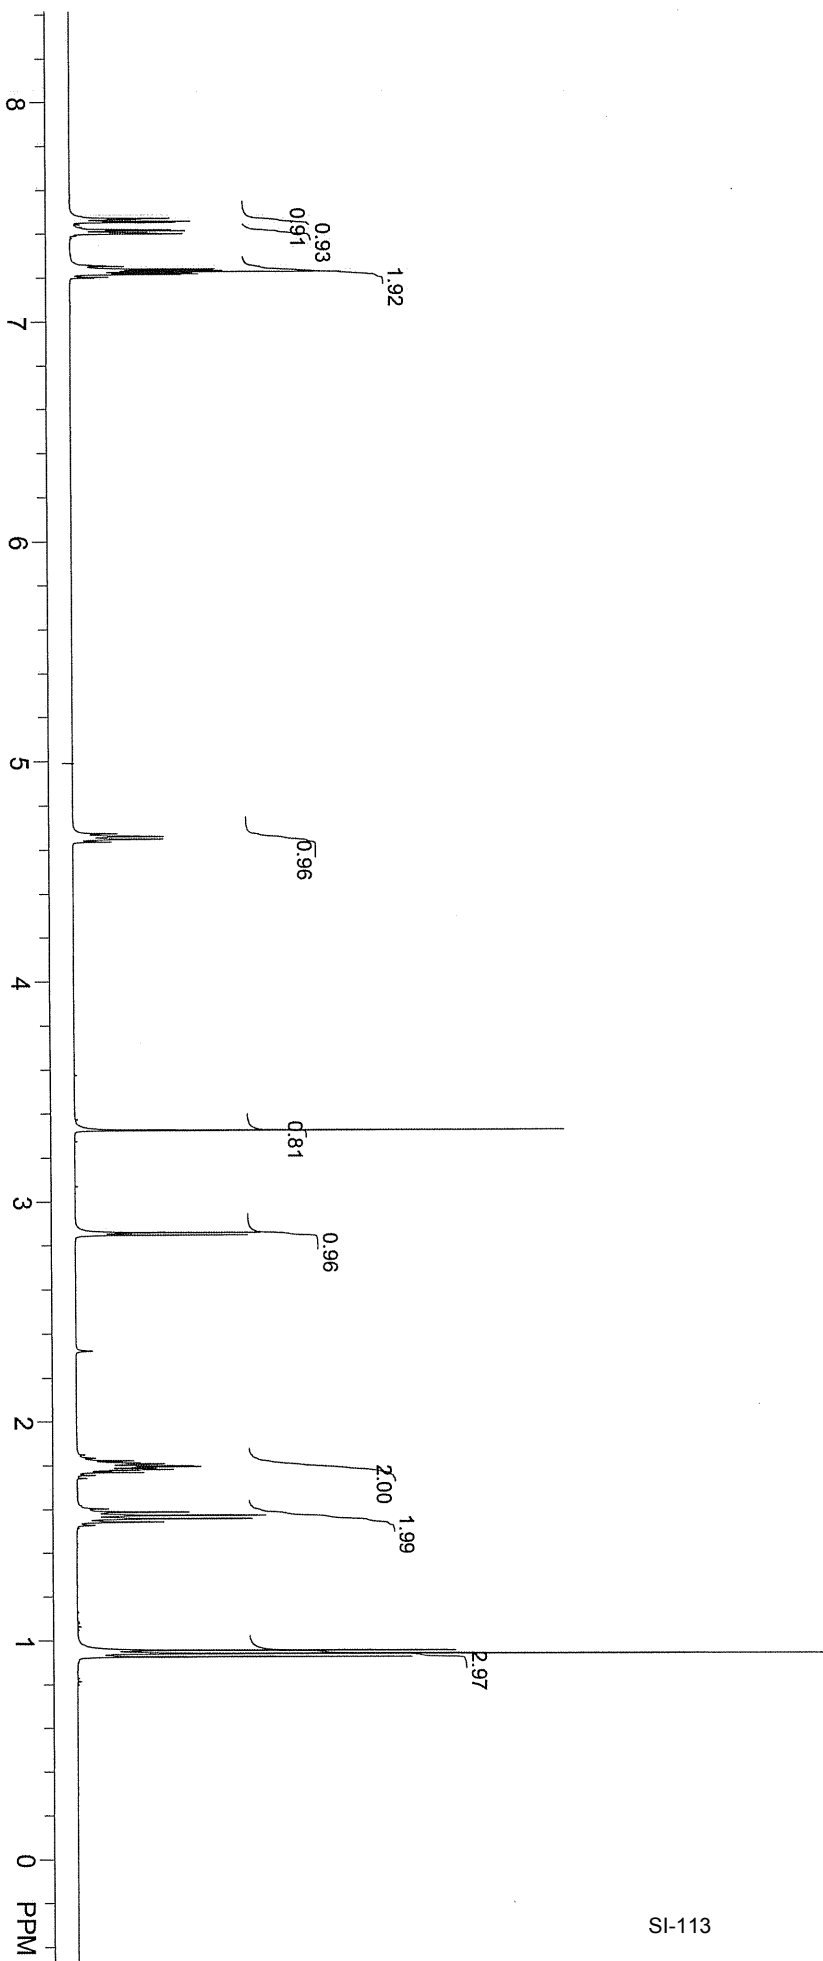

C:\Users\zhanglab1\Desktop\NMR\Ntus 20080731\DATA\yw-5-198-s-c1.fid

yw-5-198-s-c  
May 10 2011

USER:

SOLVENT: cdcl3

Experiment = s2pul

Pulse length = 6.000 usec

Relaxation delay = 3.000 sec

NA = 54

Solvent = cdcl3

FID PTS1d = 36749

PTS1d = 65536

F1 = 125.701683 MHz

F2 = 499.858551 MHz

SW1 = 28258.57 Hz

AT1 = 1.30 sec

Hz per Pt 1stD = 0.43 Hz

SW2 = 1.00 Hz

Hz per Pt 2ndD = 1.00 Hz

O1 = 12753.5664 Hz

O2 = -0.5000 Hz

LB1 = 2.00 Hz

TP A = -234.38

B = 154.69

C = 0.00

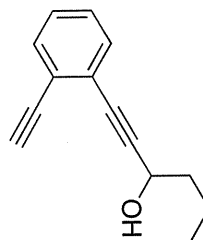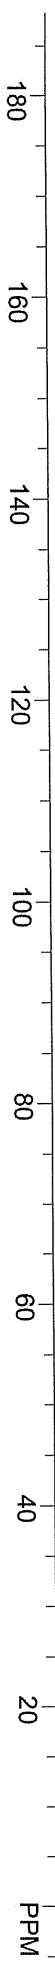

C:\Users\zhanglab1\Desktop\NMR\Ninus 20080731\DATA\yw-5-197-s-h.fid  
new experiment  
May 11 2011

USER:

SOLVENT: cdcl3  
Experiment = szpul  
Pulse length = 11.663 usec  
Relaxation delay = 4.800 sec  
NA = 12

Solvent = cdcl3

FID PTS1d = 20006

PTS1d = 32768

F1 = 399.950684 MHz

F2 = 100.575279 MHz

SW1 = 8002.40 Hz

AT1 = 2.50 sec

Hz per Pt 1stD = 0.24 Hz

SW2 = 1.00 Hz

Hz per Pt 2ndD = 1.00 Hz

O1 = 2006.7504 Hz

O2 = -0.5000 Hz

LB1 = 0.00 Hz

TP A = -45.92

B = -36.04

C = 0.00

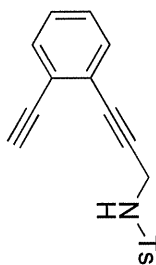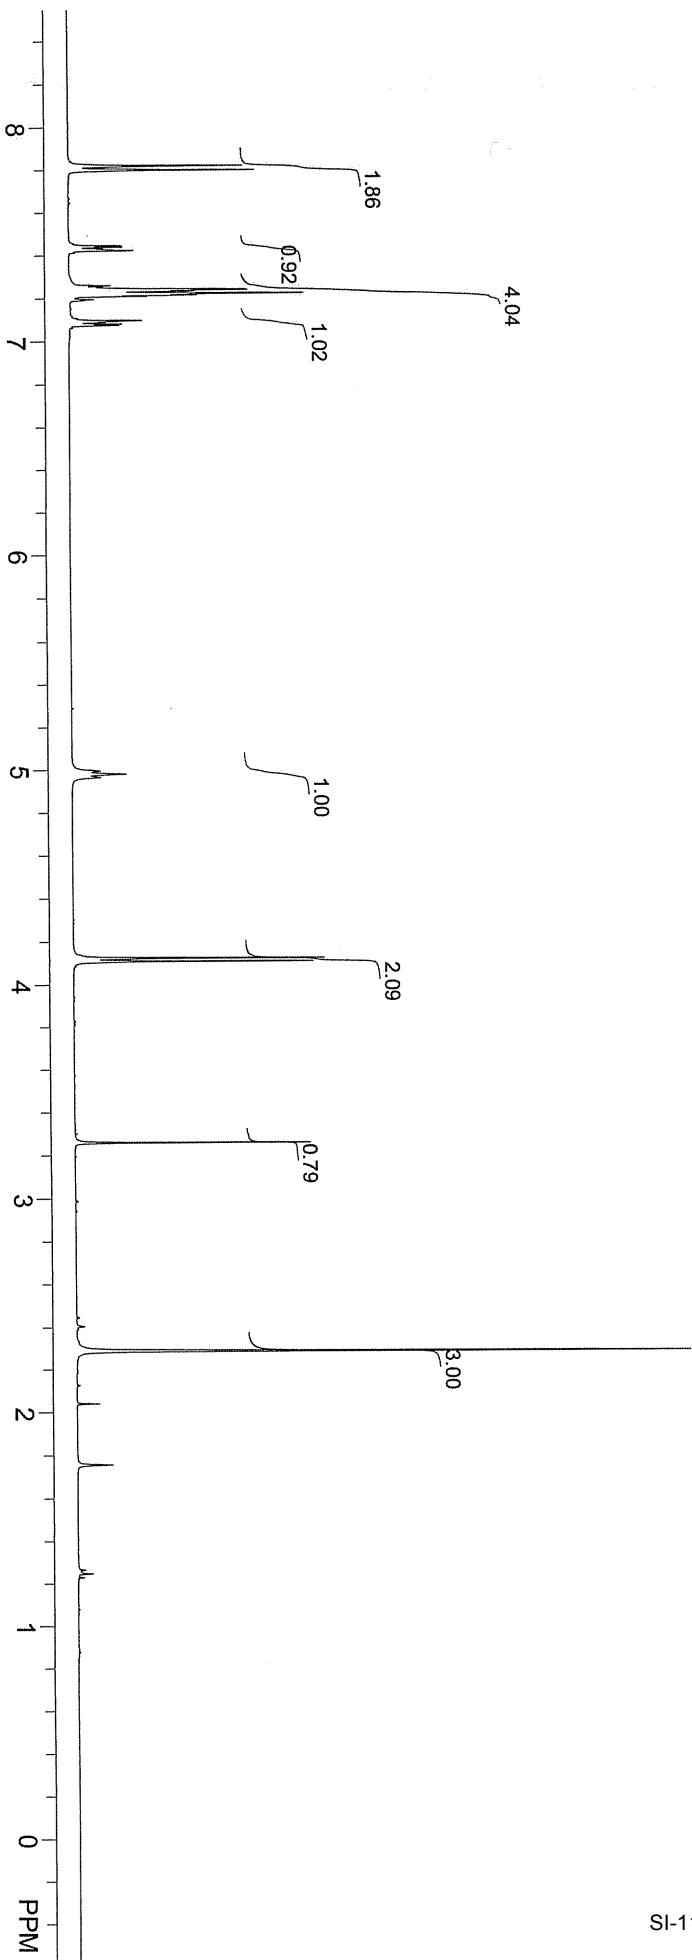

C:\Users\zhanglab\1\Desktop\NMR\Nitus 20080731\DATA\yw-5-197-s-c2.fid  
Standard c13 run using qnp probe

May 11 2011

USER:

SOLVENT: cdcl3

Experiment = s2pul

Pulse length = 7.775 usec

Relaxation delay = 1.300 sec

NA = 128

Solvent = cdcl3

FID PTS1d = 28040

PTS1d = 32768

F1 = 100.577232 MHz

F2 = 399.950684 MHz

SW1 = 28040.66 Hz

AT1 = 1.00 sec

Hz per Pt 1stD = 0.86 Hz

SW2 = 1.00 Hz

Hz per Pt 2ndD = 1.00 Hz

O1 = 10052.0820 Hz

O2 = -0.5000 Hz

LB1 = 2.00 Hz

TP A = -18.28

B = -11.25

C = 0.00

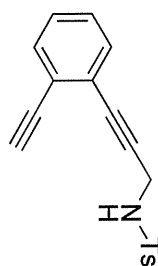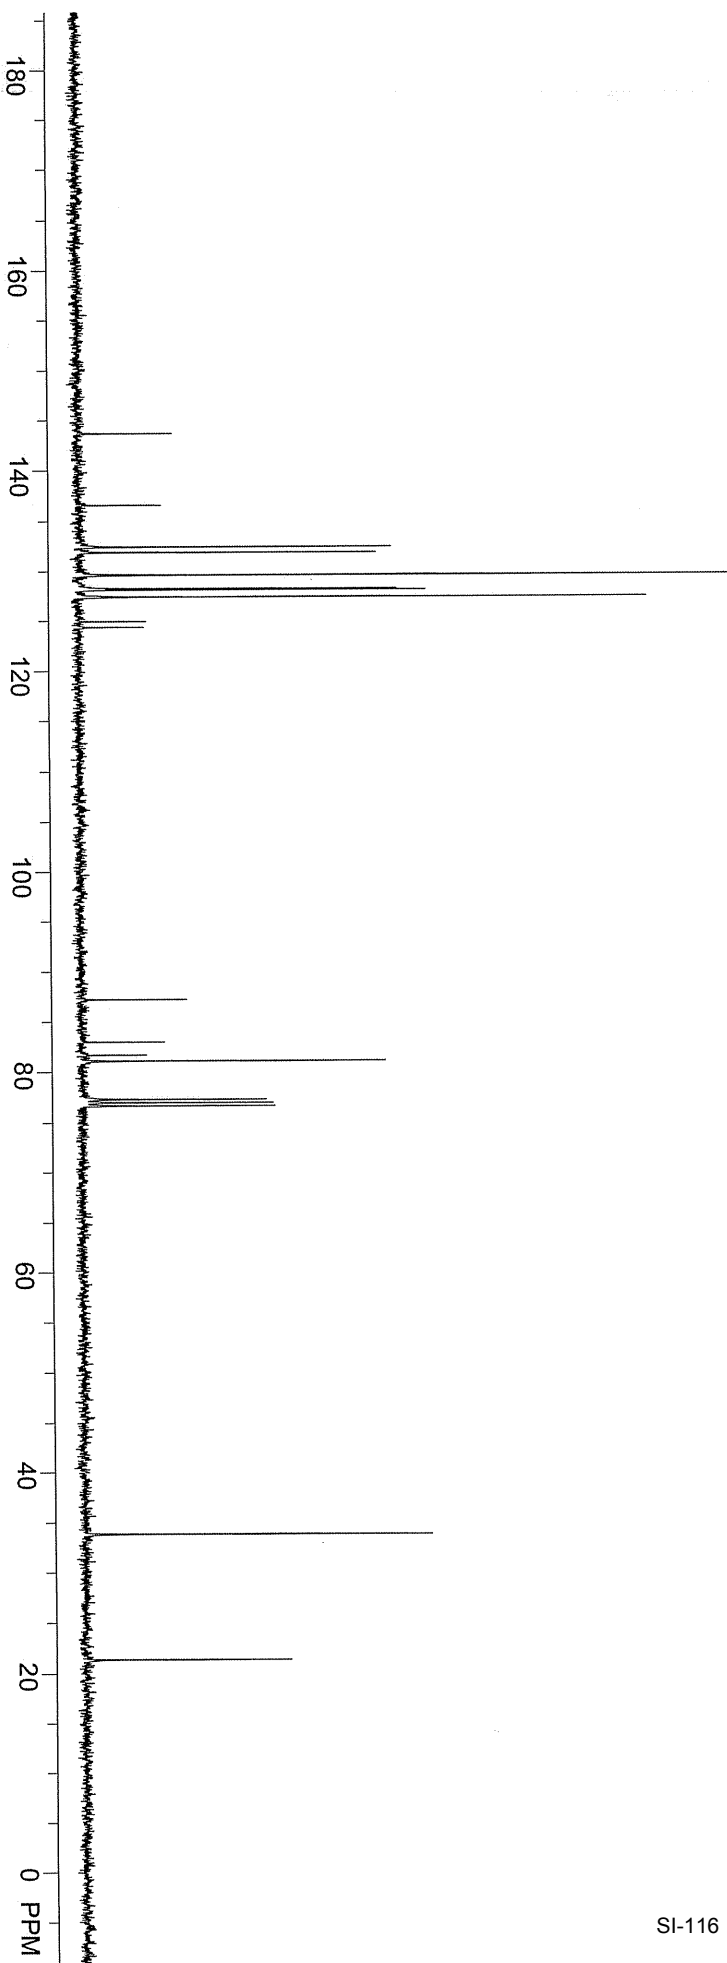

C:\Users\zhanglab1\Desktop\NMR\Nitus 20080731\DATA\yw-5-149-2.fid  
new experiment

Apr 8 2011

USER:

SOLVENT: cdcl3

Experiment = s2pul

Pulse length = 11.663 usec

Relaxation delay = 4.800 sec

NA = 16

Solvent = cdcl3

FID PTSid = 20006

PTSid = 32768

F1 = 399.950684 MHz

F2 = 100.575279 MHz

SW1 = 8002.40 Hz

AT1 = 2.50 sec

Hz per Pt 1sid = 0.24 Hz

SW2 = 1.00 Hz

Hz per Pt 2ndD = 1.00 Hz

O1 = 2006.7504 Hz

O2 = -0.5000 Hz

LB1 = 0.00 Hz

TP A = -49.28

B = -33.09

C = 0.00

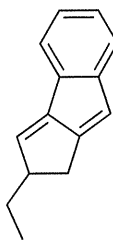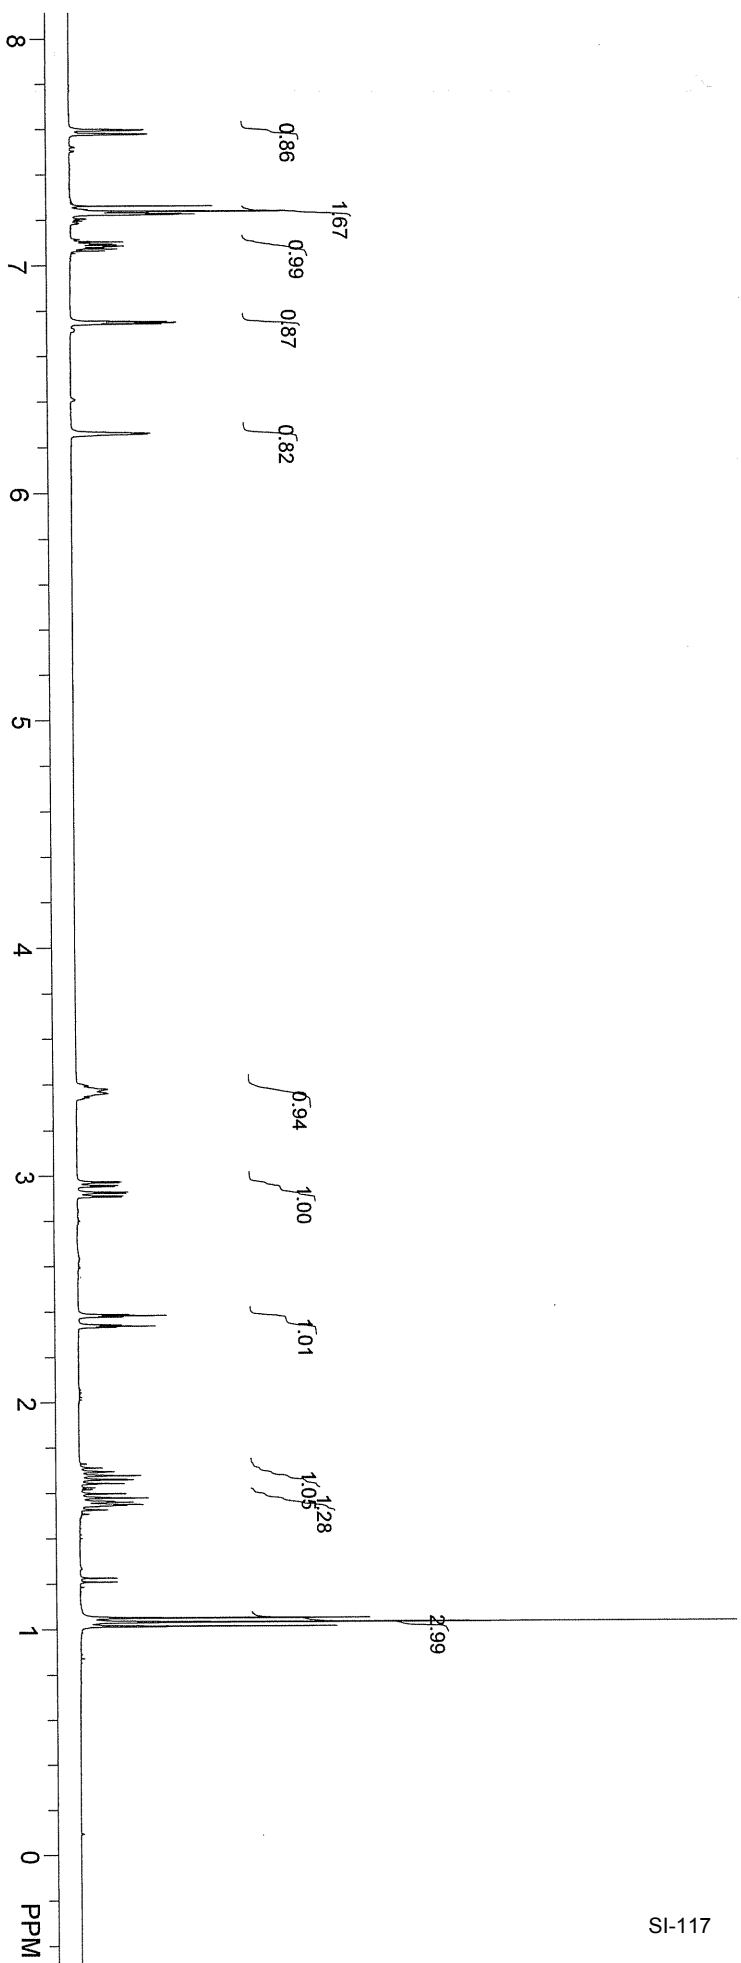

C:\Users\zhanglab1\Desktop\NMR\Nitus 20080731\DATA\5yw-5-139-c.fid  
STANDARD CARBON PARAMETERSVU  
Mar 31 2011

USER:  
SOLVENT: cdc13  
Experiment = s2pul  
Pulse length = 6.000 usec  
Relaxation delay = 3.000 sec  
NA = 76  
Solvent = cdc13  
FID PTS1d = 36749  
PTS1d = 65536  
F1 = 125.701683 MHz  
F2 = 499.858551 MHz  
SW1 = 28258.57 Hz  
AT1 = 1.30 sec  
Hz per Pt 1stD = 0.43 Hz  
SW2 = 1.00 Hz  
Hz per Pt 2ndD = 1.00 Hz  
O1 = 12771.6768 Hz  
O2 = -0.5000 Hz  
LB1 = 2.00 Hz  
TP A = -239.06  
B = 146.25  
C = 0.00

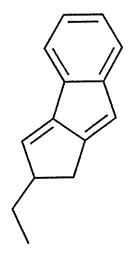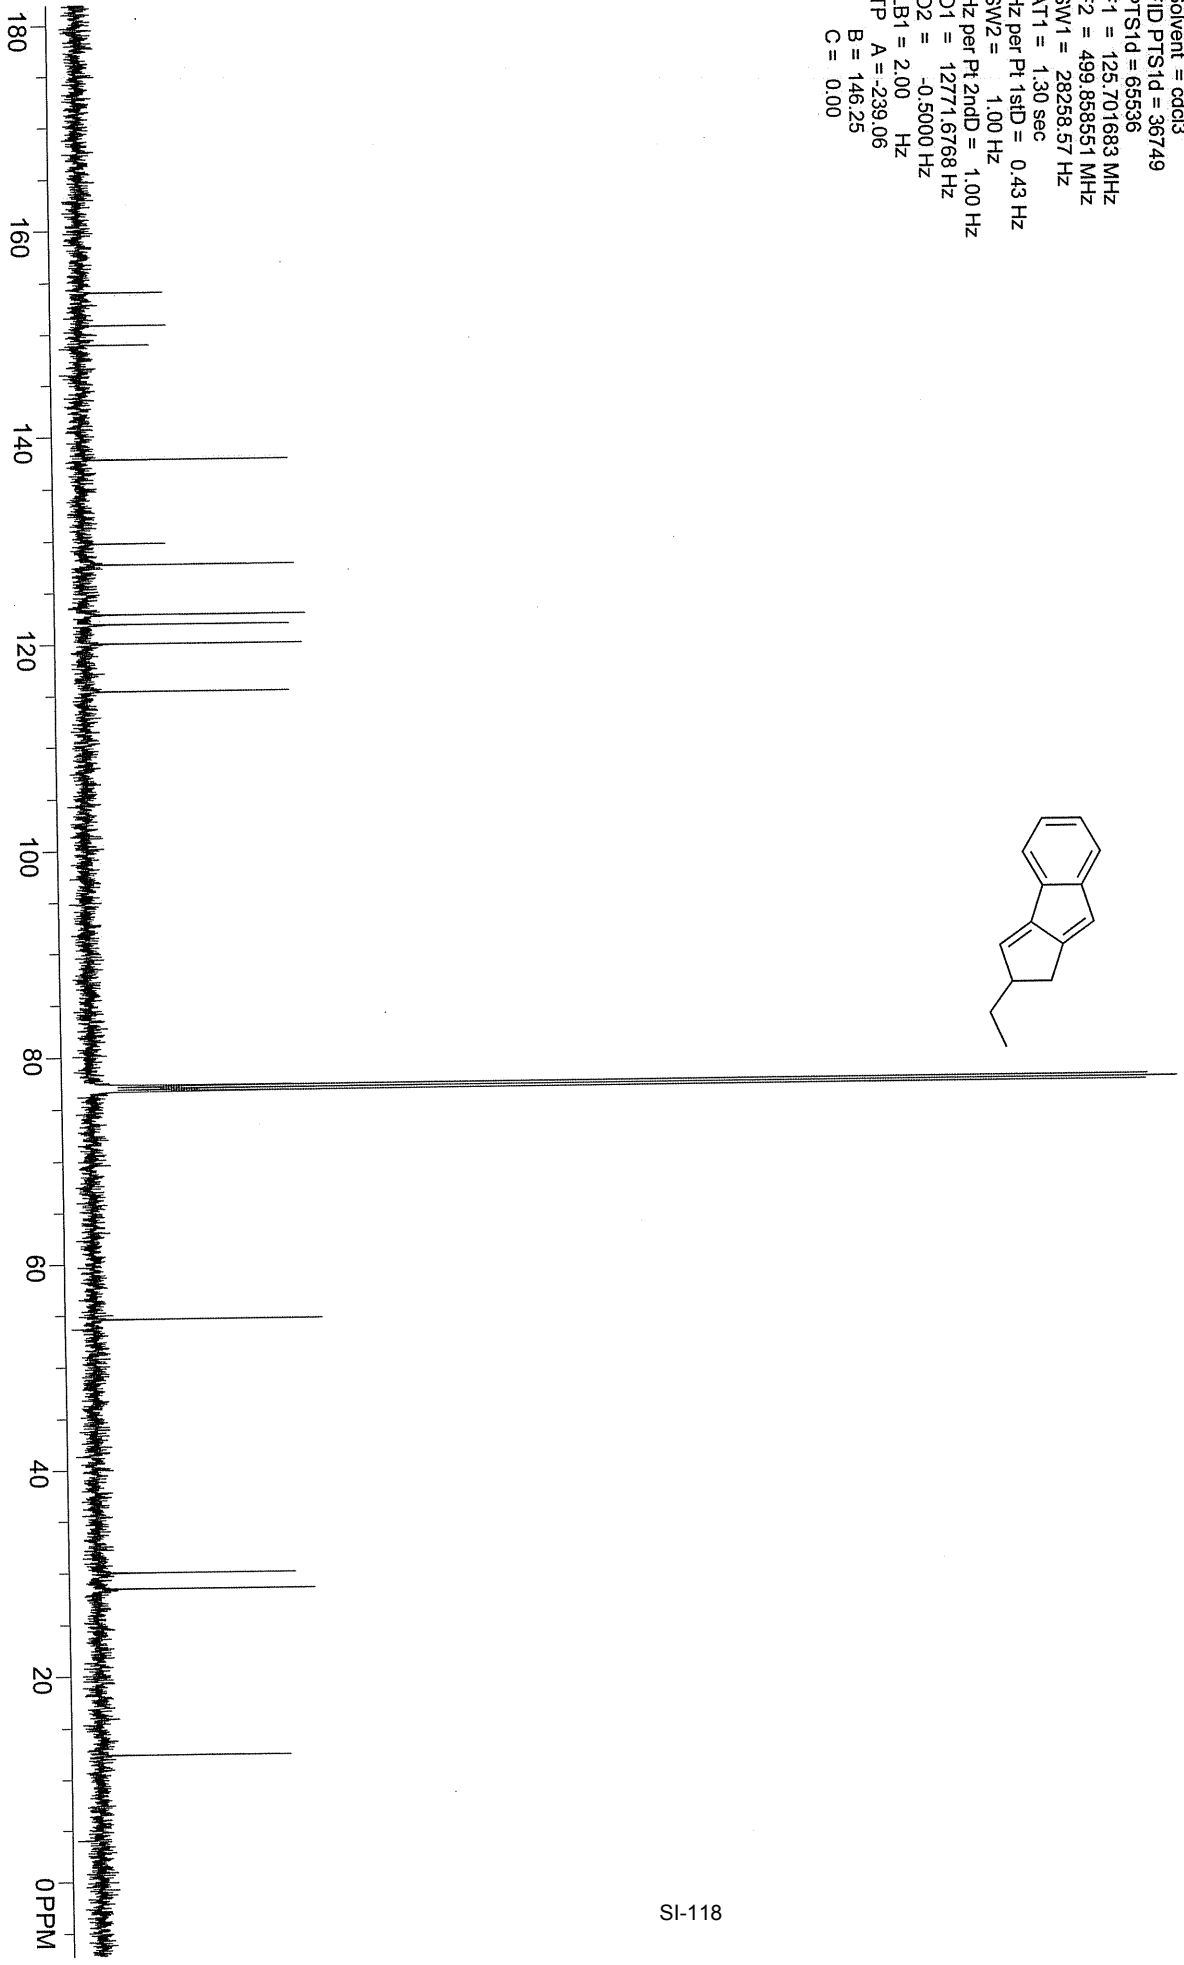

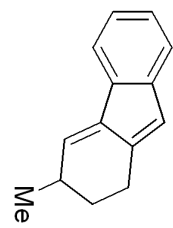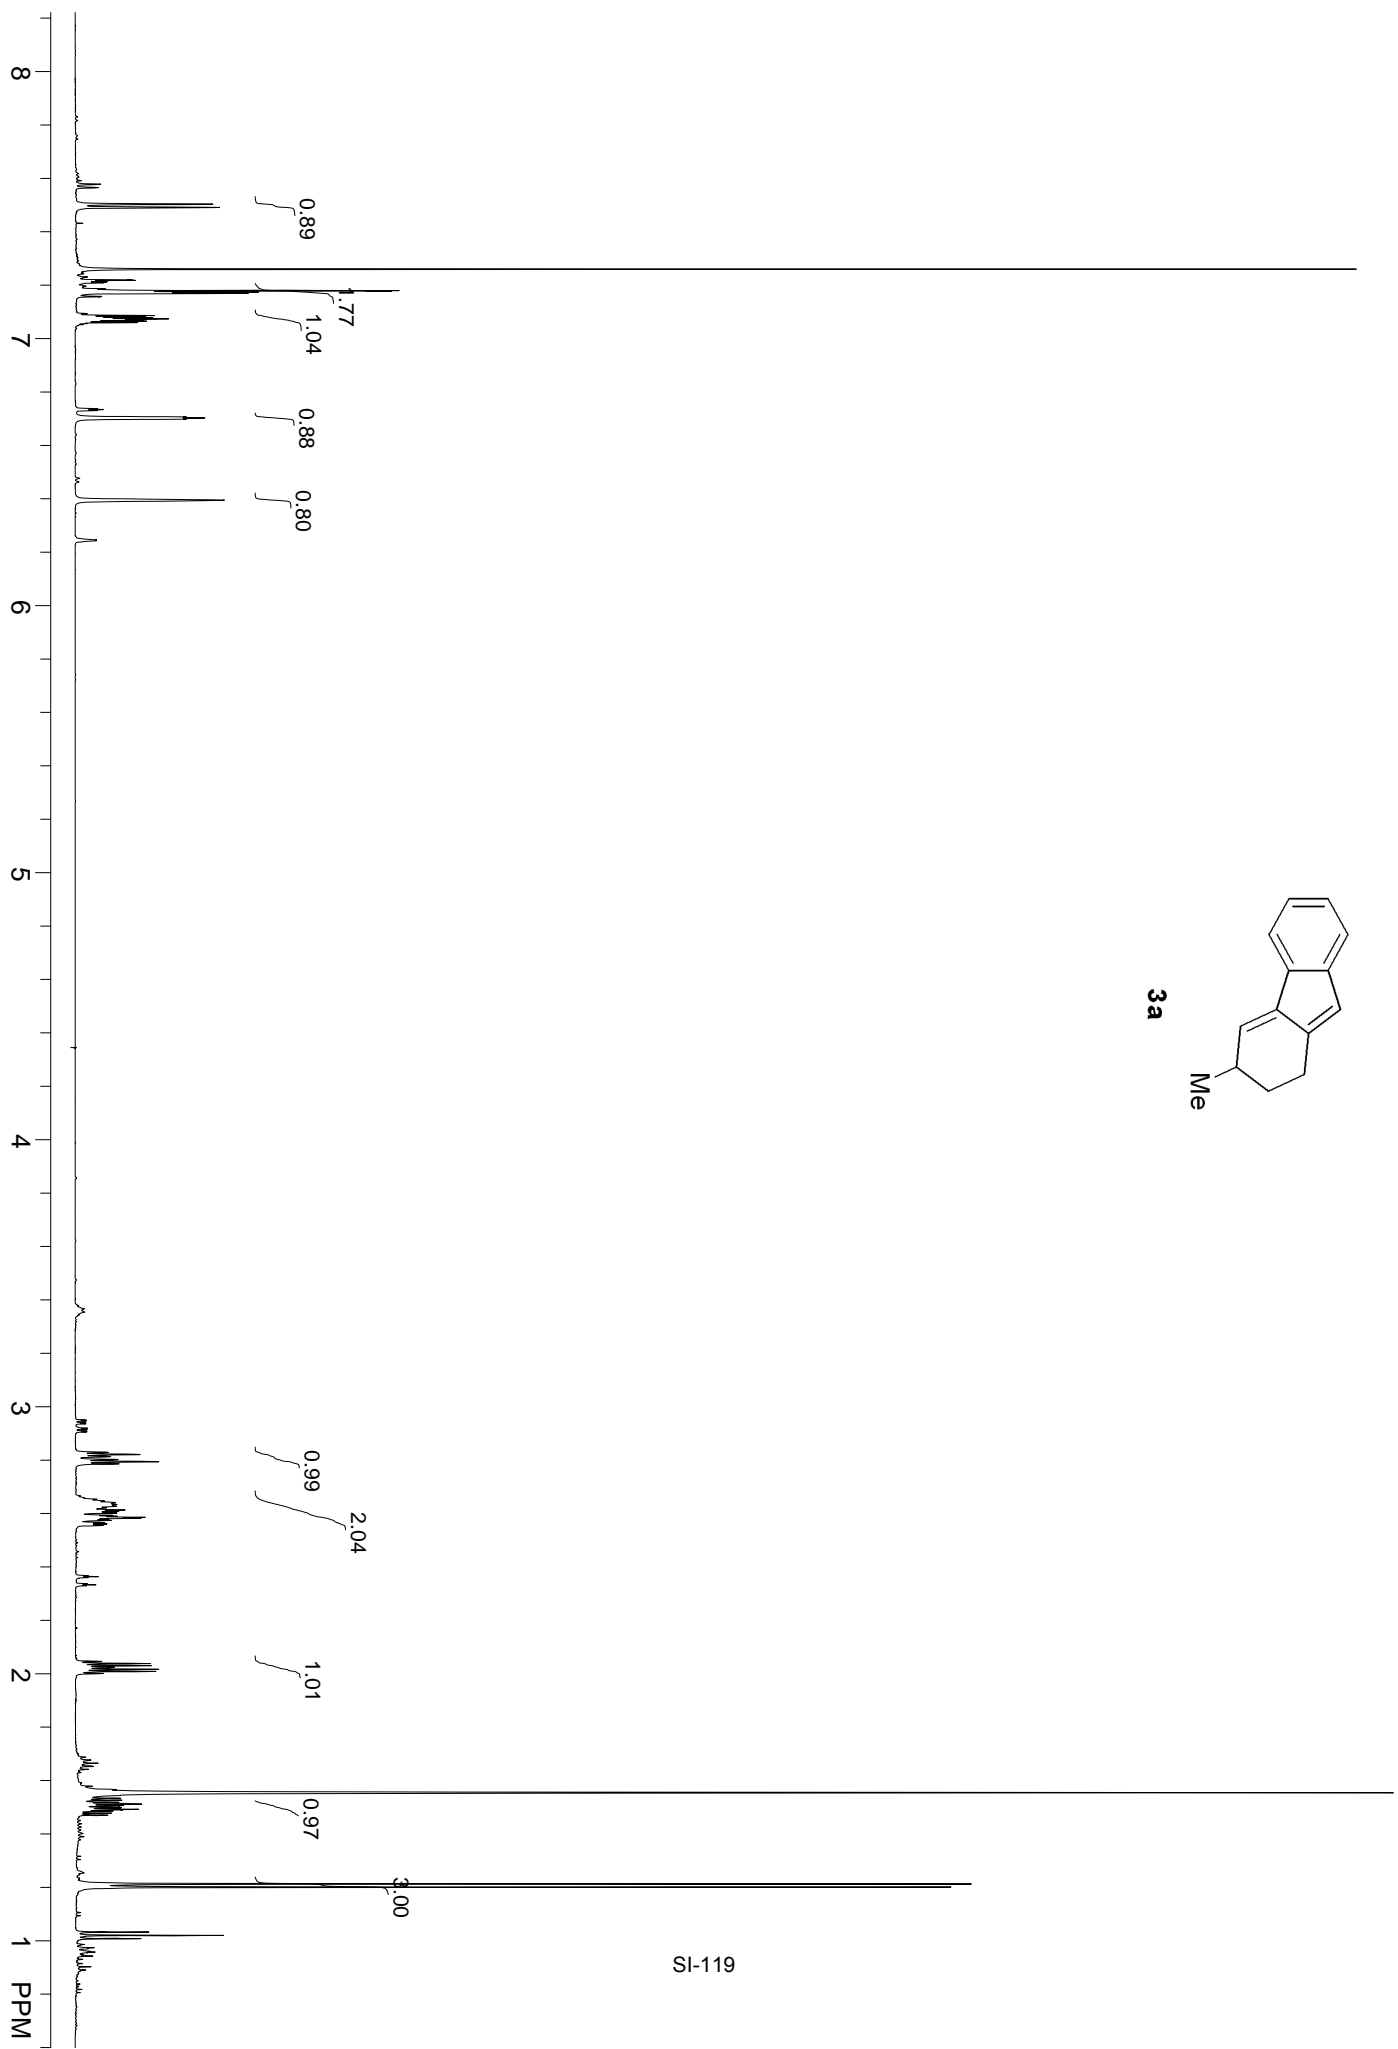

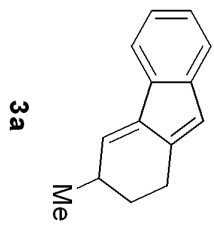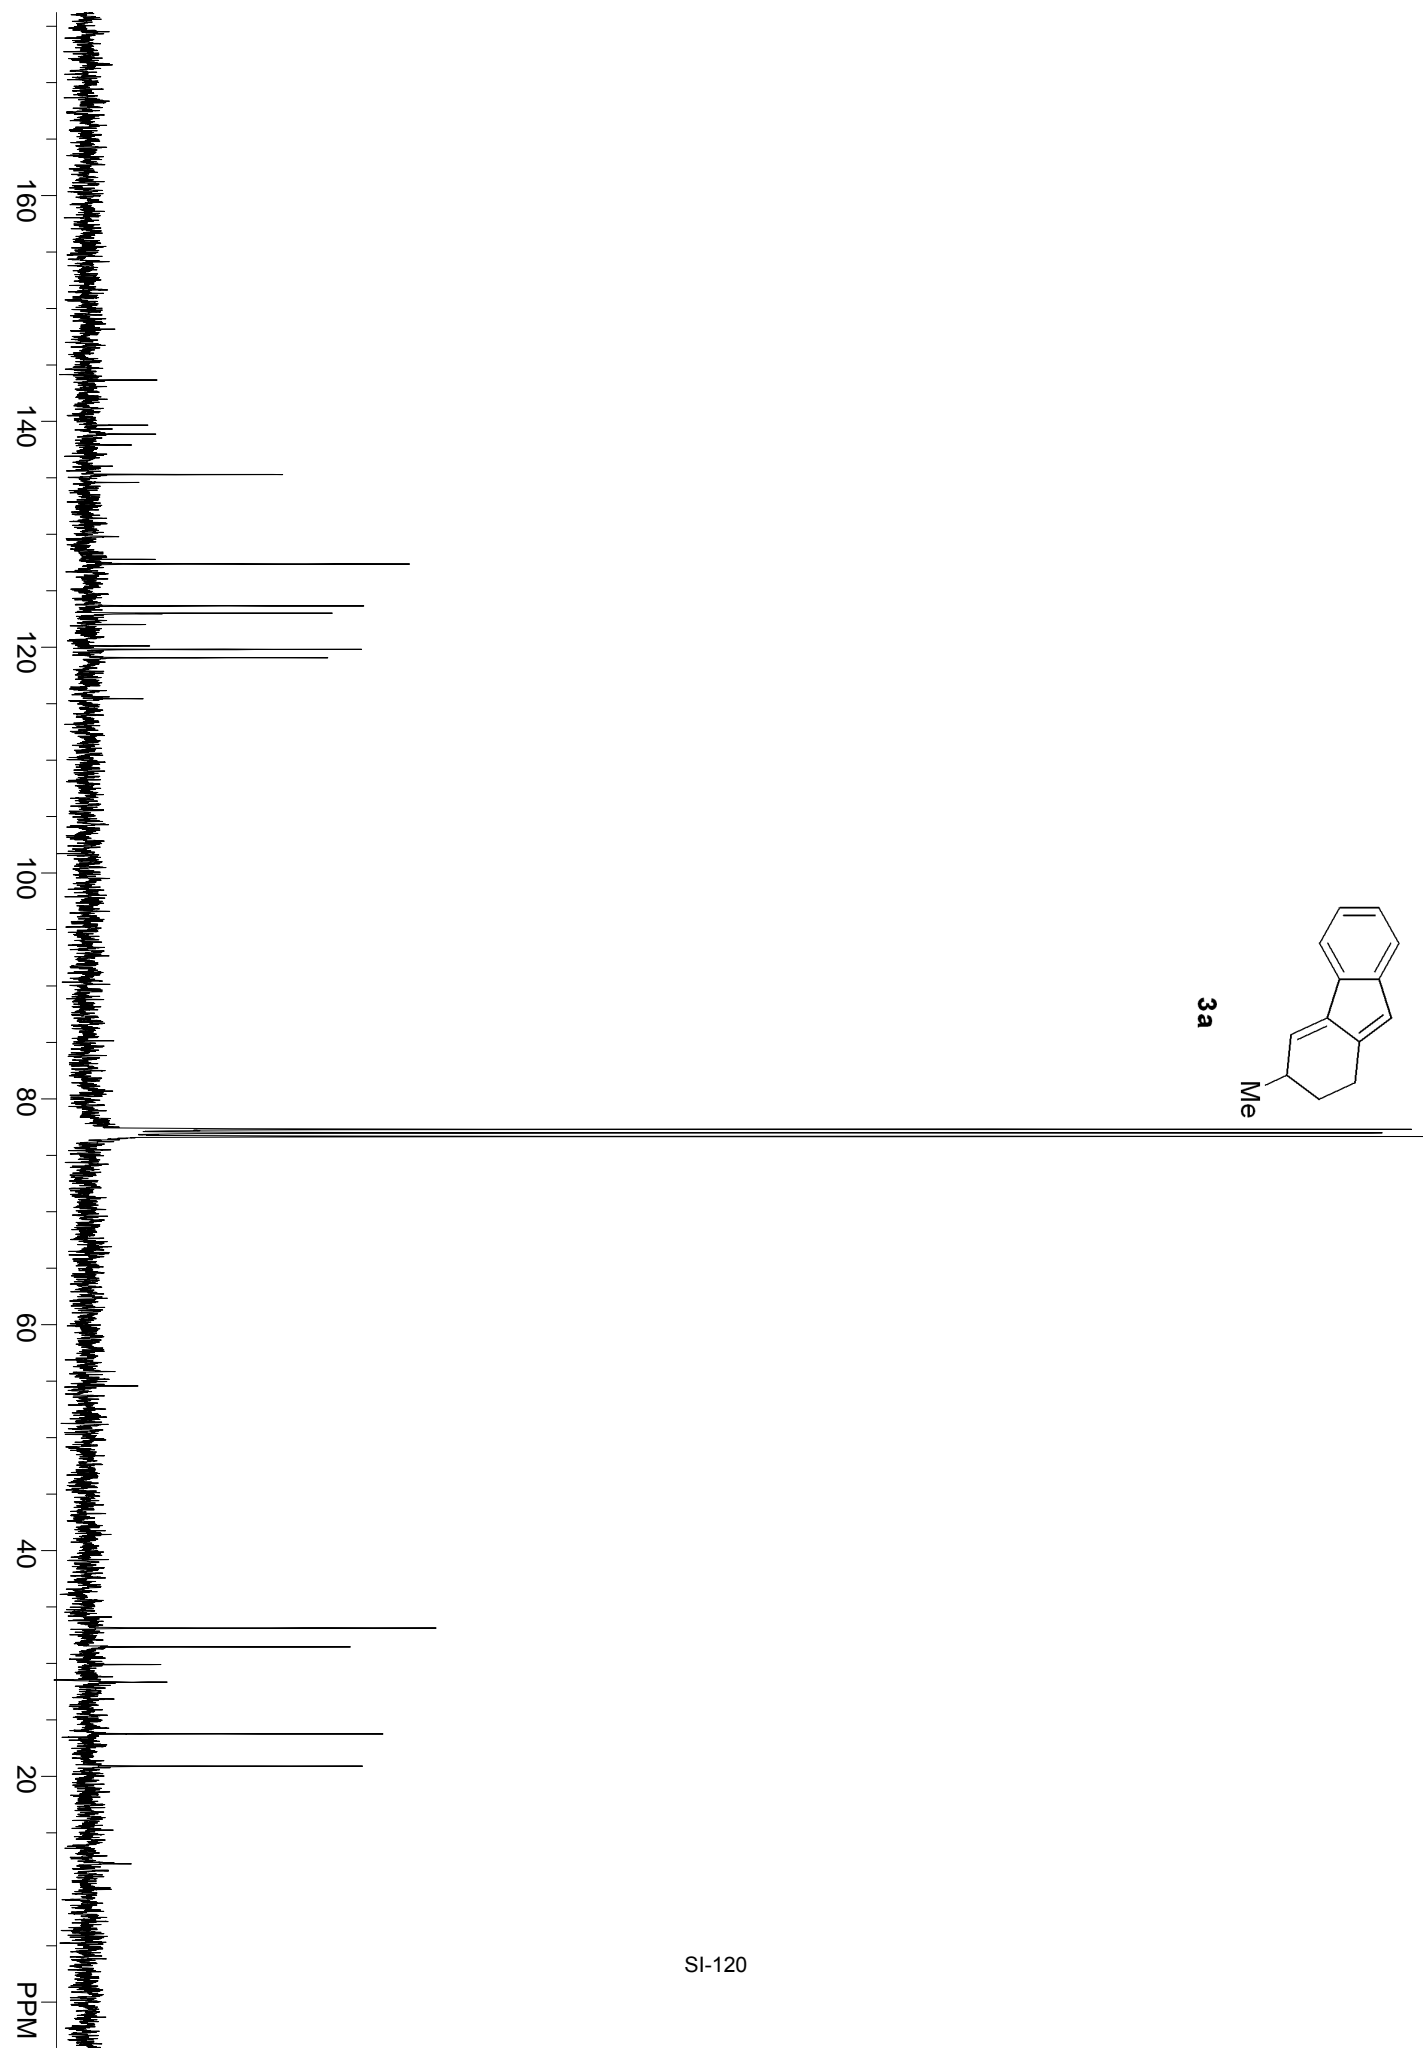



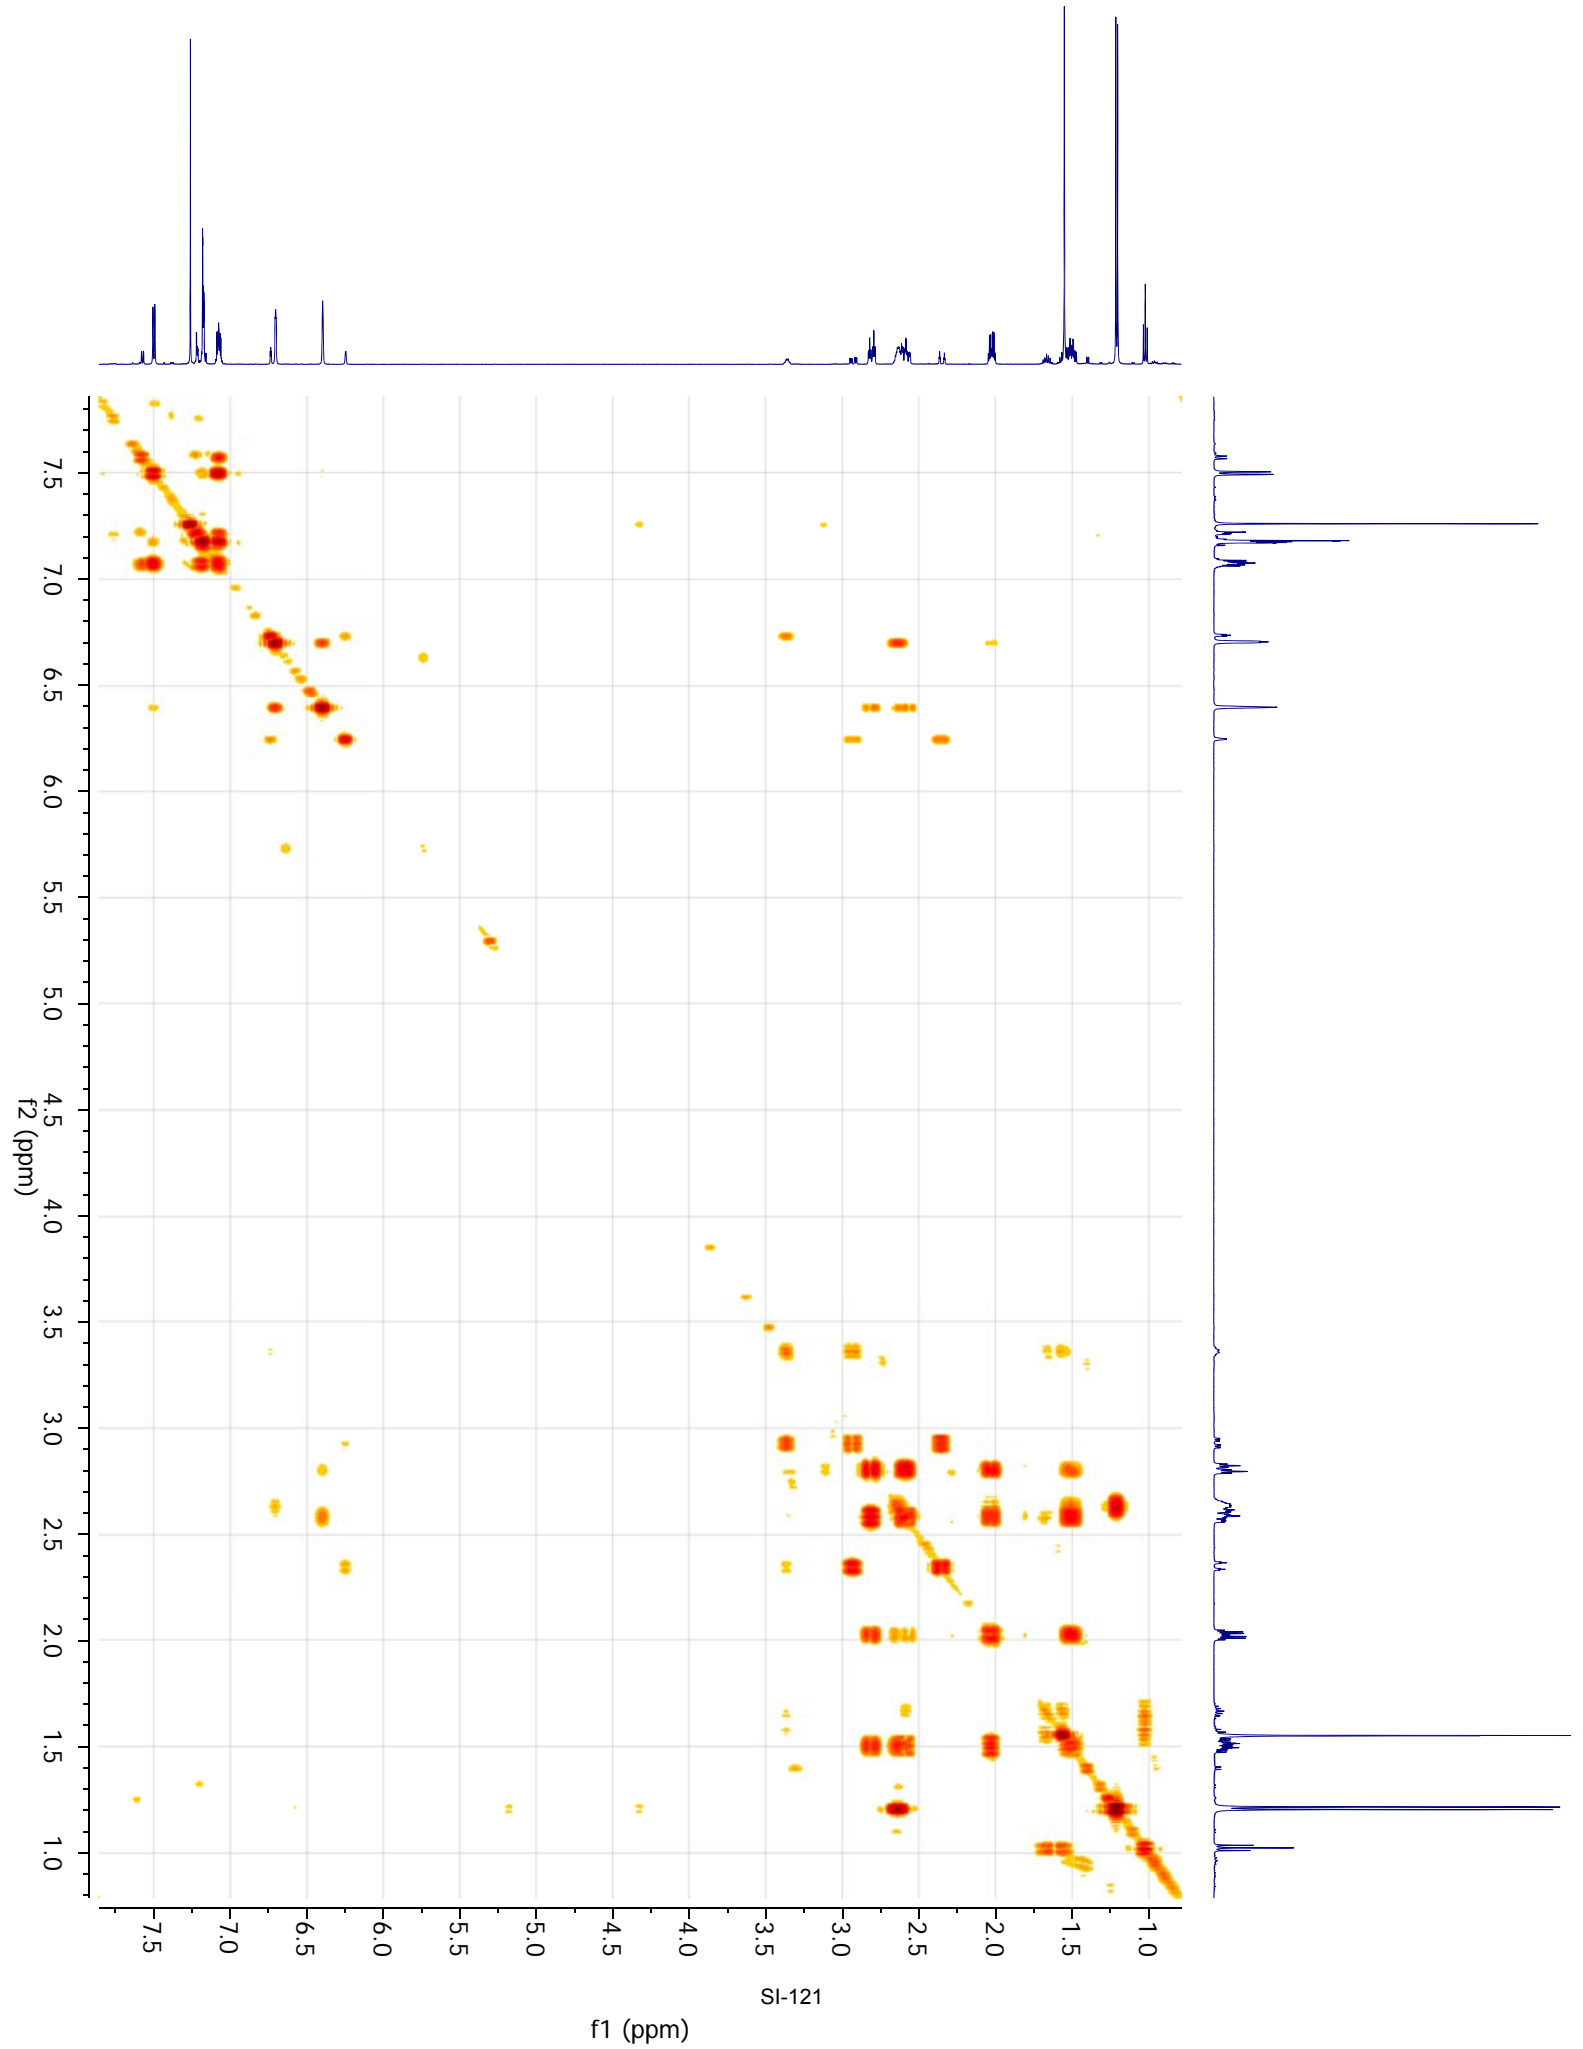

C:\Users\zhanglab1\Desktop\NMR\Ntus 20080731\DATA\5\vw-5-160-hn.fid

H1\_CDCL3  
Apr 14 2011

USER:

SOLVENT: CDCl3

Experiment = s2pul

Pulse length = 7.700 usec

Relaxation delay = 4.800 sec

NA = 8

Solvent = CDCl3

FID PTS1d = 21289

PTS1d = 32768

F1 = 499.858551 MHz

F2 = 1.000000 MHz

SW1 = 8503.40 Hz

AT1 = 2.50 sec

Hz per Pt 1stD = 0.26 Hz

SW2 = 1.00 Hz

Hz per Pt 2ndD = 1.00 Hz

O1 = 2499.2932 Hz

O2 = -0.5000 Hz

LB1 = 0.00 Hz

TP A = 70.55

B = -13.01

C = 0.00

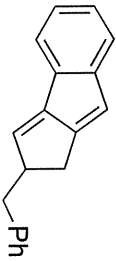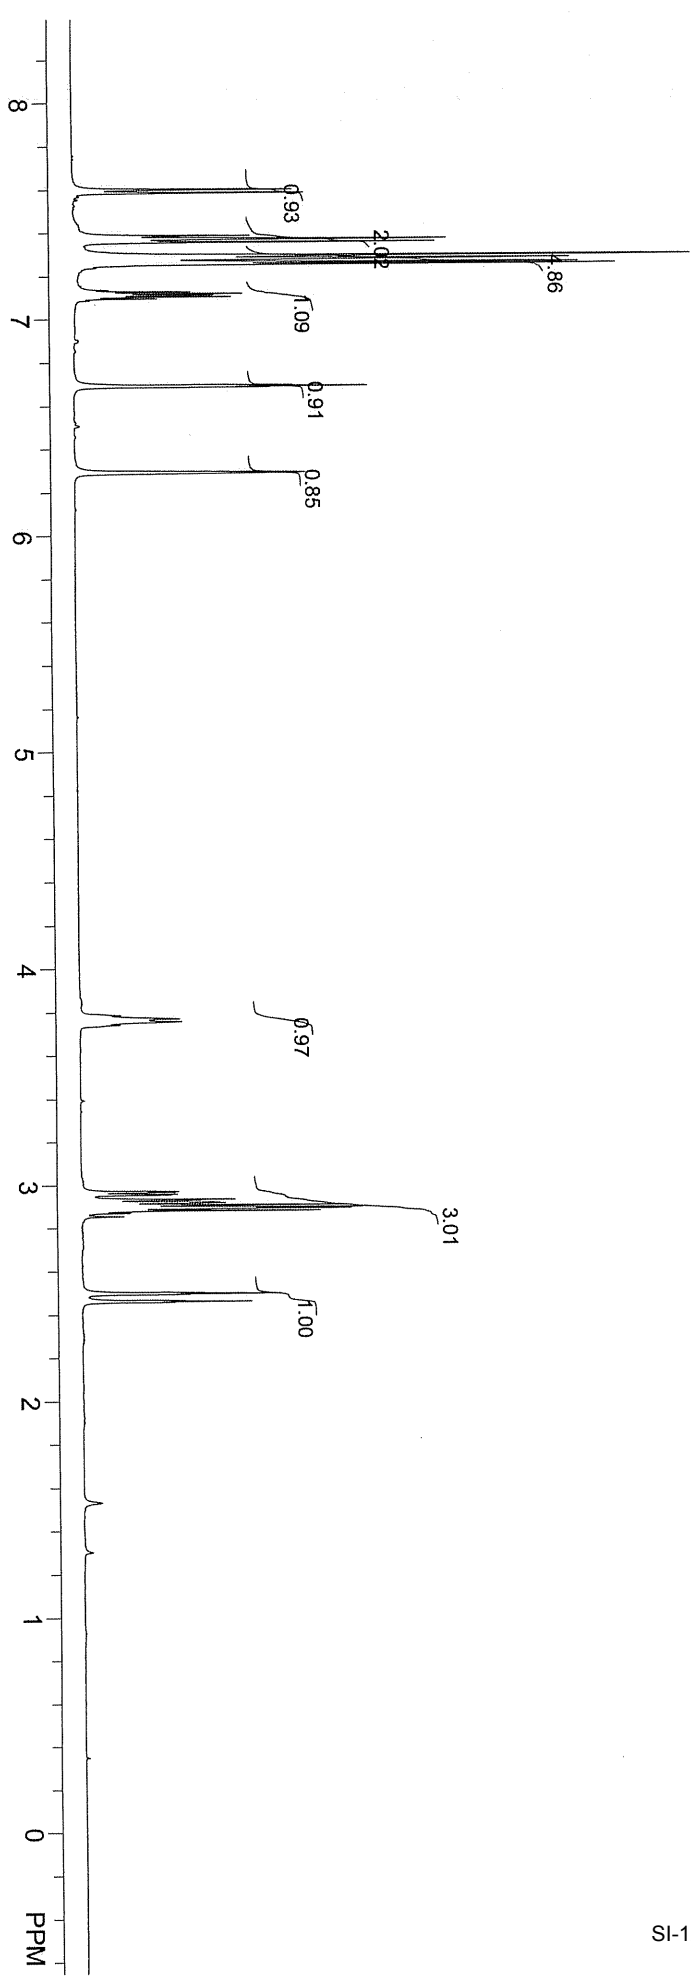

C:\Users\zhanglab1\Desktop\NMR\Ninus 20080731\DATA\5-160-p-c1.fid

Apr 14 2011

USER:

SOLVENT: cdcl3

Experiment = s2pul

Pulse length = 6.000 usec

Relaxation delay = 3.000 sec

NA = 164

Solvent = cdcl3

FID PTS1d = 36749

PTS1d = 65536

F1 = 125.701683 MHz

F2 = 499.858551 MHz

SW1 = 28258.57 Hz

AT1 = 1.30 sec

Hz per Pt 1sfd = 0.43 Hz

SW2 = 1.00 Hz

Hz per Pt 2ndd = 1.00 Hz

O1 = 12766.5029 Hz

O2 = -0.5000 Hz

LB1 = 2.00 Hz

TP A = 104.53

B = 160.31

C = 0.00

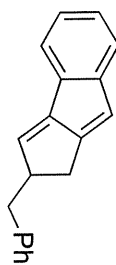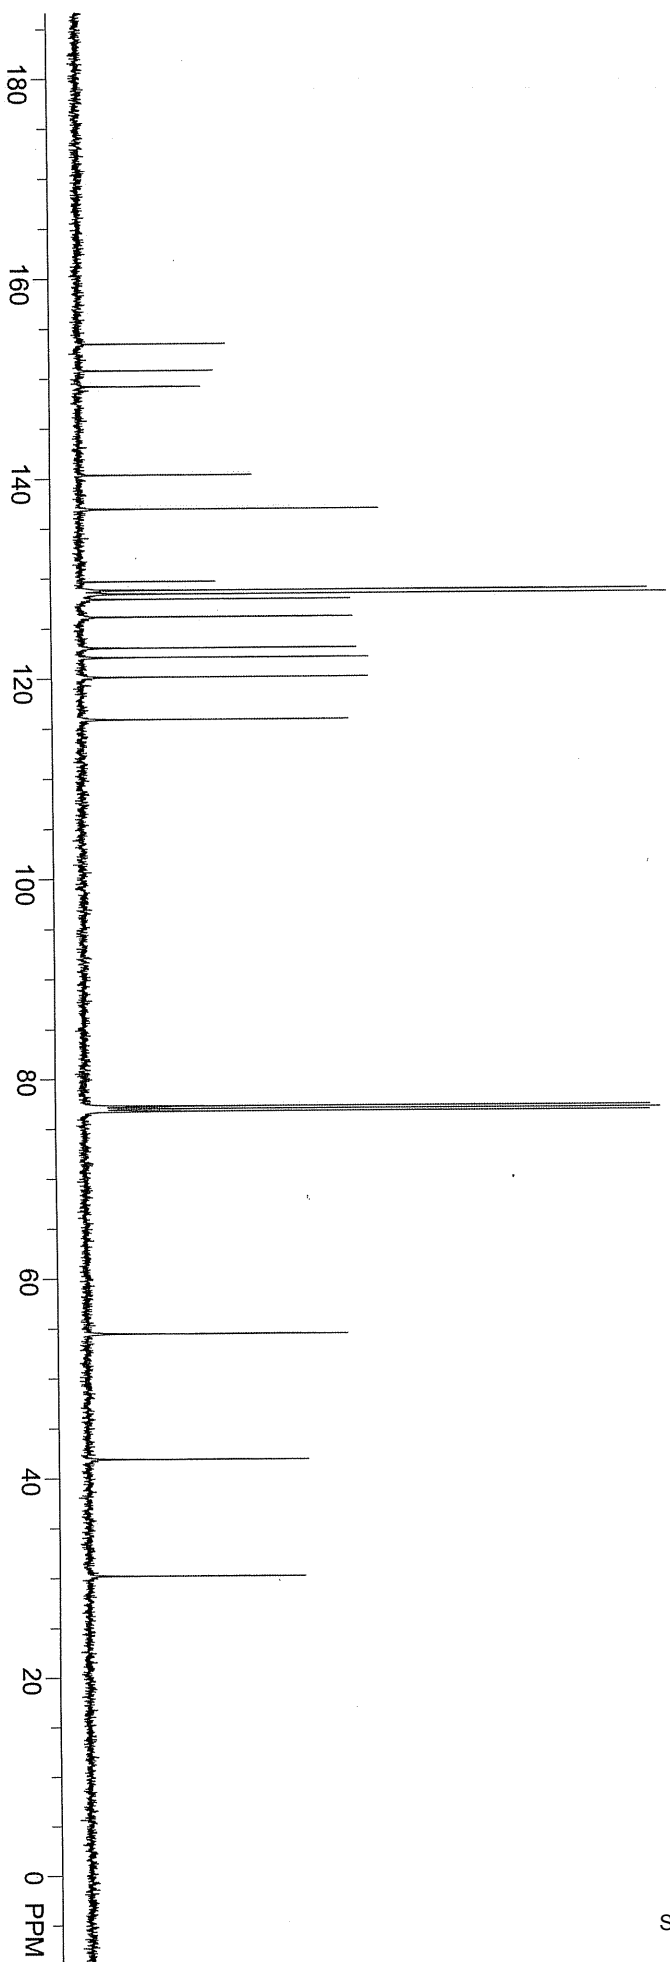

May 3 2011

USER:

SOLVENT: cdcl3

Experiment = szpul

Pulse length = 11.663 usec

Relaxation delay = 4.800 sec

NA = 10

Solvent = cdcl3

FID.PT.S1d = 20006

PT.S1d = 32768

F1 = 399.950684 MHz

F2 = 100.575279 MHz

SW1 = 8002.40 Hz

AT1 = 2.50 sec

Hz per Pt 1s1d = 0.24 Hz

SW2 = 1.00 Hz

Hz per Pt 2ndd = 1.00 Hz

O1 = 2006.7504 Hz

O2 = -0.5000 Hz

LB1 = 0.00 Hz

TP A = -50.63

B = -29.06

C = 0.00

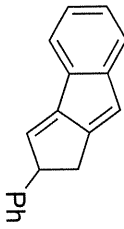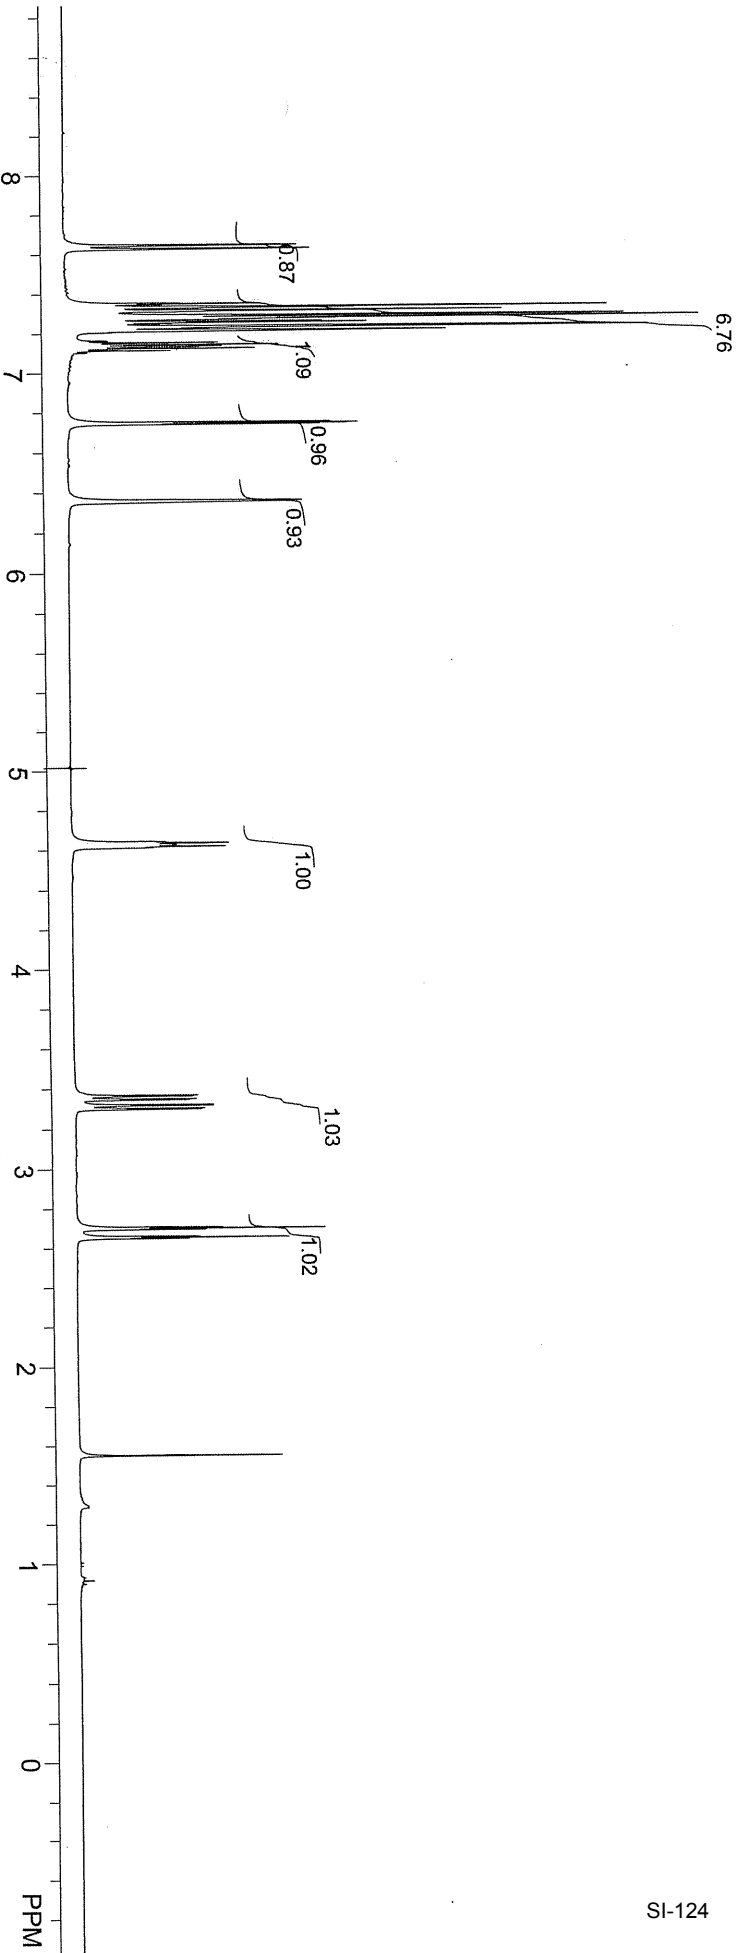

May 3 2011

USER:

SOLVENT: cdcl3

Experiment = szpul

Pulse length = 7.775 usec

Relaxation delay = 1.300 sec

NA = 300

Solvent = cdcl3

FID PTS1d = 28040

PTS1d = 32768

F1 = 100.577232 MHz

F2 = 399.950684 MHz

SW1 = 28040.66 Hz

AT1 = 1.00 sec

Hz per Pt 1sid = 0.86 Hz

SW2 = 1.00 Hz

Hz per Pt 2ndd = 1.00 Hz

O1 = 10053.7930 Hz

O2 = -0.5000 Hz

LB1 = 2.00 Hz

TP A = -11.25

B = -45.00

C = 0.00

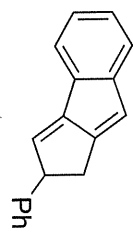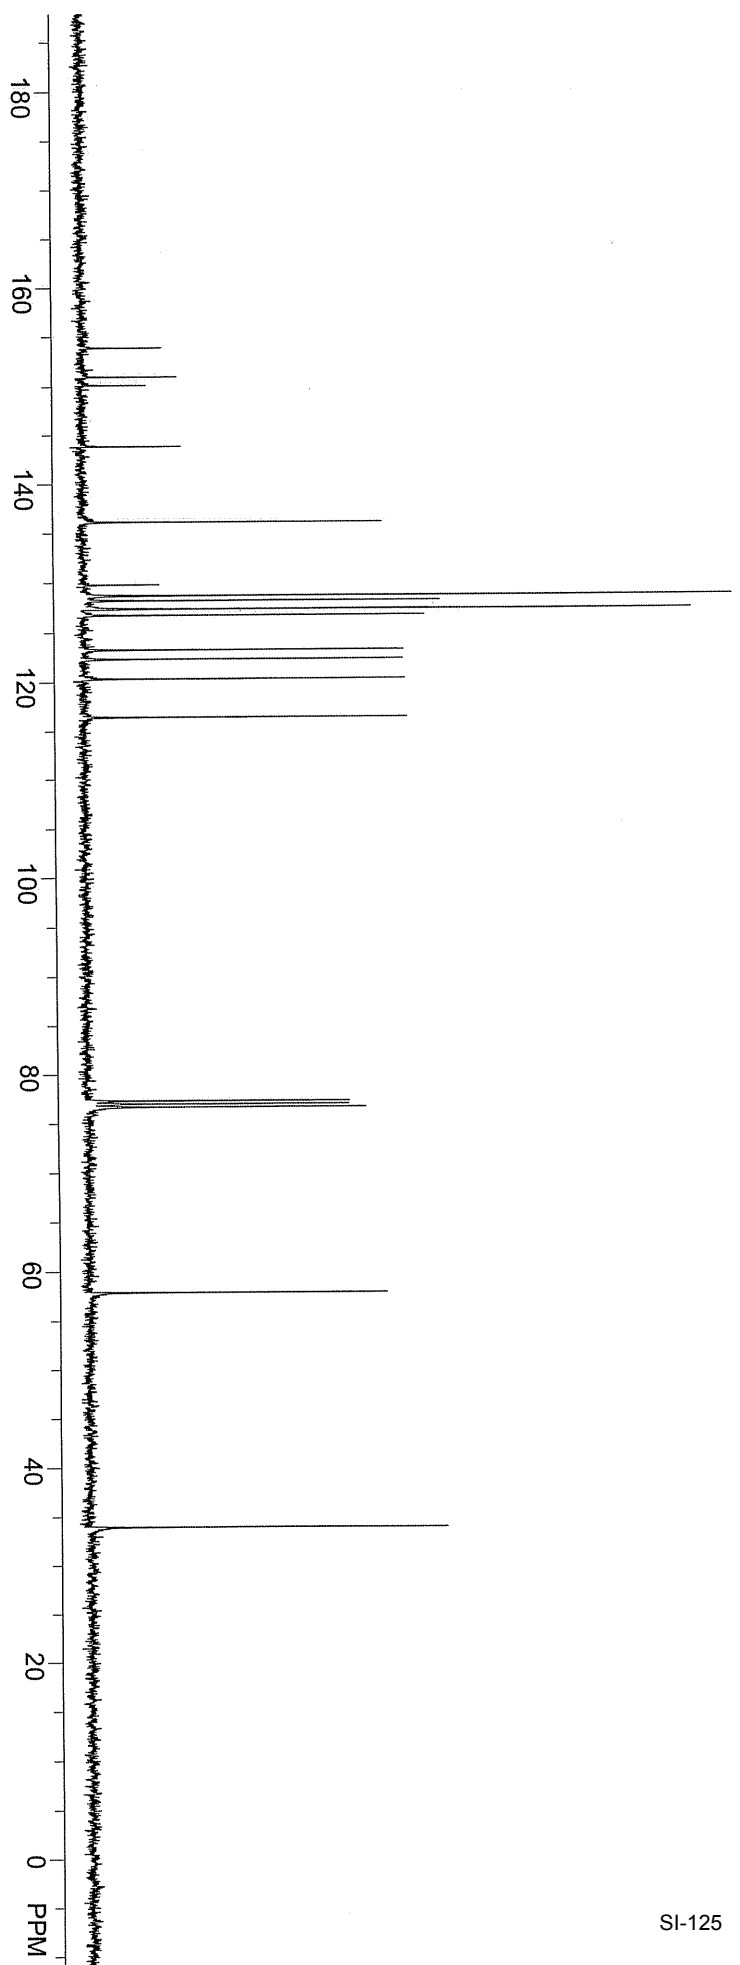

C:\Users\zhanglab1\Desktop\NMR\Ninus 20090731\DATA\yw-5-162-Cl-04242011.fid  
new experiment  
Apr 24 2011

USER:

SOLVENT: cdcl3  
Experiment = s2pul  
Pulse length = 11.663 usec  
Relaxation delay = 4.800 sec  
NA = 8

Solvent = cdcl3  
FID.PTS:1d = 20006

PTS:1d = 32768

F1 = 399.950684 MHz

F2 = 100.575279 MHz

SW1 = 8002.40 Hz

AT1 = 2.50 sec

Hz per Pt 1stD = 0.24 Hz

SW2 = 1.00 Hz

Hz per Pt 2ndD = 1.00 Hz

O1 = 2006.7504 Hz

O2 = -0.5000 Hz

LB1 = 0.00 Hz

TP A = -46.60

B = -28.25

C = 0.00

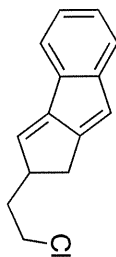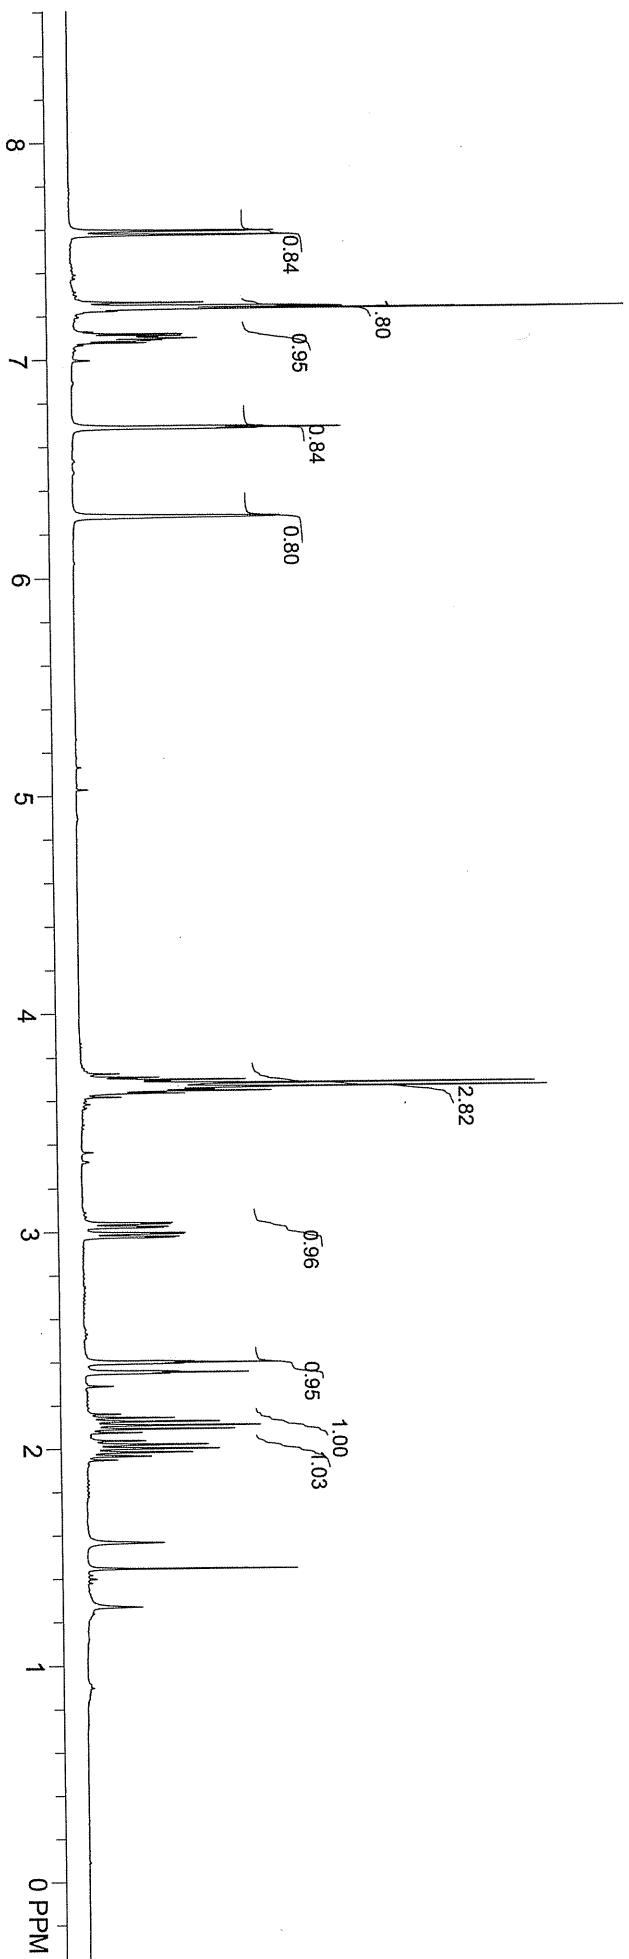

C:\Users\zhanglab1\Desktop\NMR\Ninus 20080731\DATA\5-yiw-5-162-04252011-Cl-c5.fid  
STANDARD CARBON PARAMETERS

Apr 25 2011

USER:

SOLVENT: cdcl3

Experiment = s2pul

Pulse length = 6.000 usec

Relaxation delay = 3.000 sec

NA = 84

Solvent = cdcl3

FID PTS1d = 36749

PTS1d = 65536

F1 = 125.701683 MHz

F2 = 499.858551 MHz

SW1 = 28258.57 Hz

AT1 = 1.30 sec

Hz per Pt 1std = 0.43 Hz

SW2 = 1.00 Hz

Hz per Pt 2ndd = 1.00 Hz

O1 = 12768.6582 Hz

O2 = -0.5000 Hz

LB1 = 2.00 Hz

TP A = -170.16

B = 132.19

C = 0.00

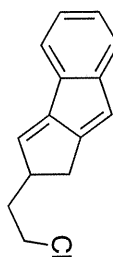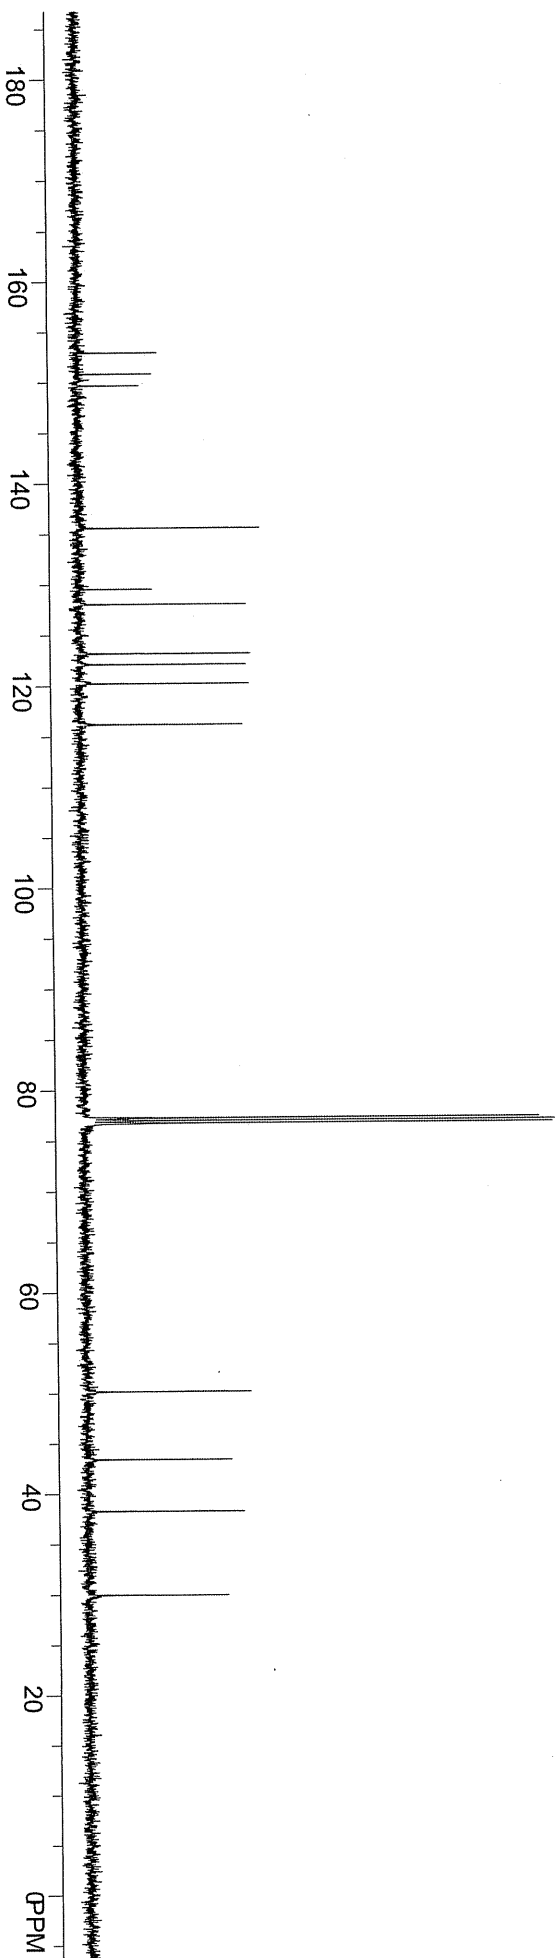

C:\Users\zhanglab1\Desktop\NMR\Nitus 20080731\DATA\yw-5-145-p-hh.fid  
new experiment  
Apr 11 2011

USER:

SOLVENT: cdcl3  
Experiment = s2pul  
Pulse length = 11.663 usec  
Relaxation delay = 4.800 sec  
NA = 14

Solvent = cdcl3  
FID PTS1d = 20006  
PTS1d = 32768  
F1 = 399.950684 MHz  
F2 = 100.575279 MHz  
SW1 = 8002.40 Hz  
AT1 = 2.50 sec  
Hz per Pt 1stD = 0.24 Hz  
SW2 = 1.00 Hz  
Hz per Pt 2ndD = 1.00 Hz  
O1 = 2006.2362 Hz  
O2 = -0.5000 Hz  
LB1 = 0.00 Hz  
TP A = -47.04  
B = -27.06  
C = 0.00

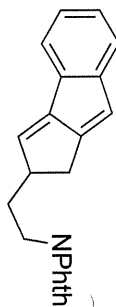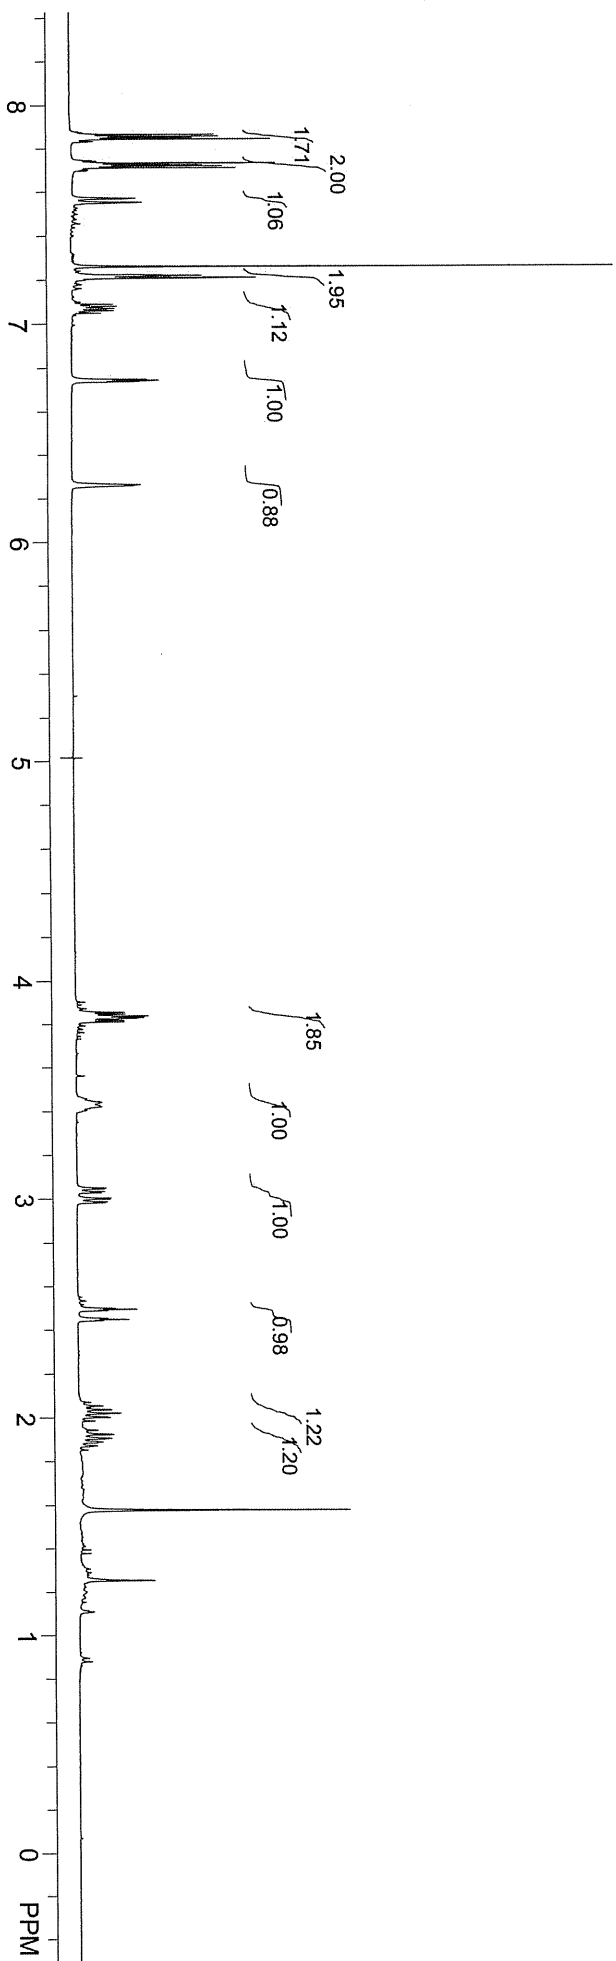



C:\Users\zhanglab1\Desktop\NMR\Ntus 20080731\DATA\yw-5-145-cc-Ntph.fid

yw-5-145-cc  
Apr 12 2011

USER:

SOLVENT: cdcl3

Experiment = s2pul

Pulse length = 6.000 usec

Relaxation delay = 3.000 sec

NA = 490

Solvent = cdcl3

FID.PT.S1d = 36749

PTS1d = 65536

F1 = 125.701683 MHz

F2 = 499.868551 MHz

SW1 = 28258.57 Hz

AT1 = 1.30 sec

Hz per Pt 1SID = 0.43 Hz

SW2 = 1.00 Hz

Hz per Pt 2ndD = 1.00 Hz

O1 = 12772.5391 Hz

O2 = -0.5000 Hz

LB1 = 2.00 Hz

TP A = -161.25

B = 102.66

C = 0.00

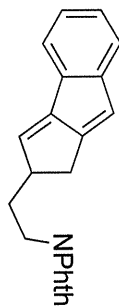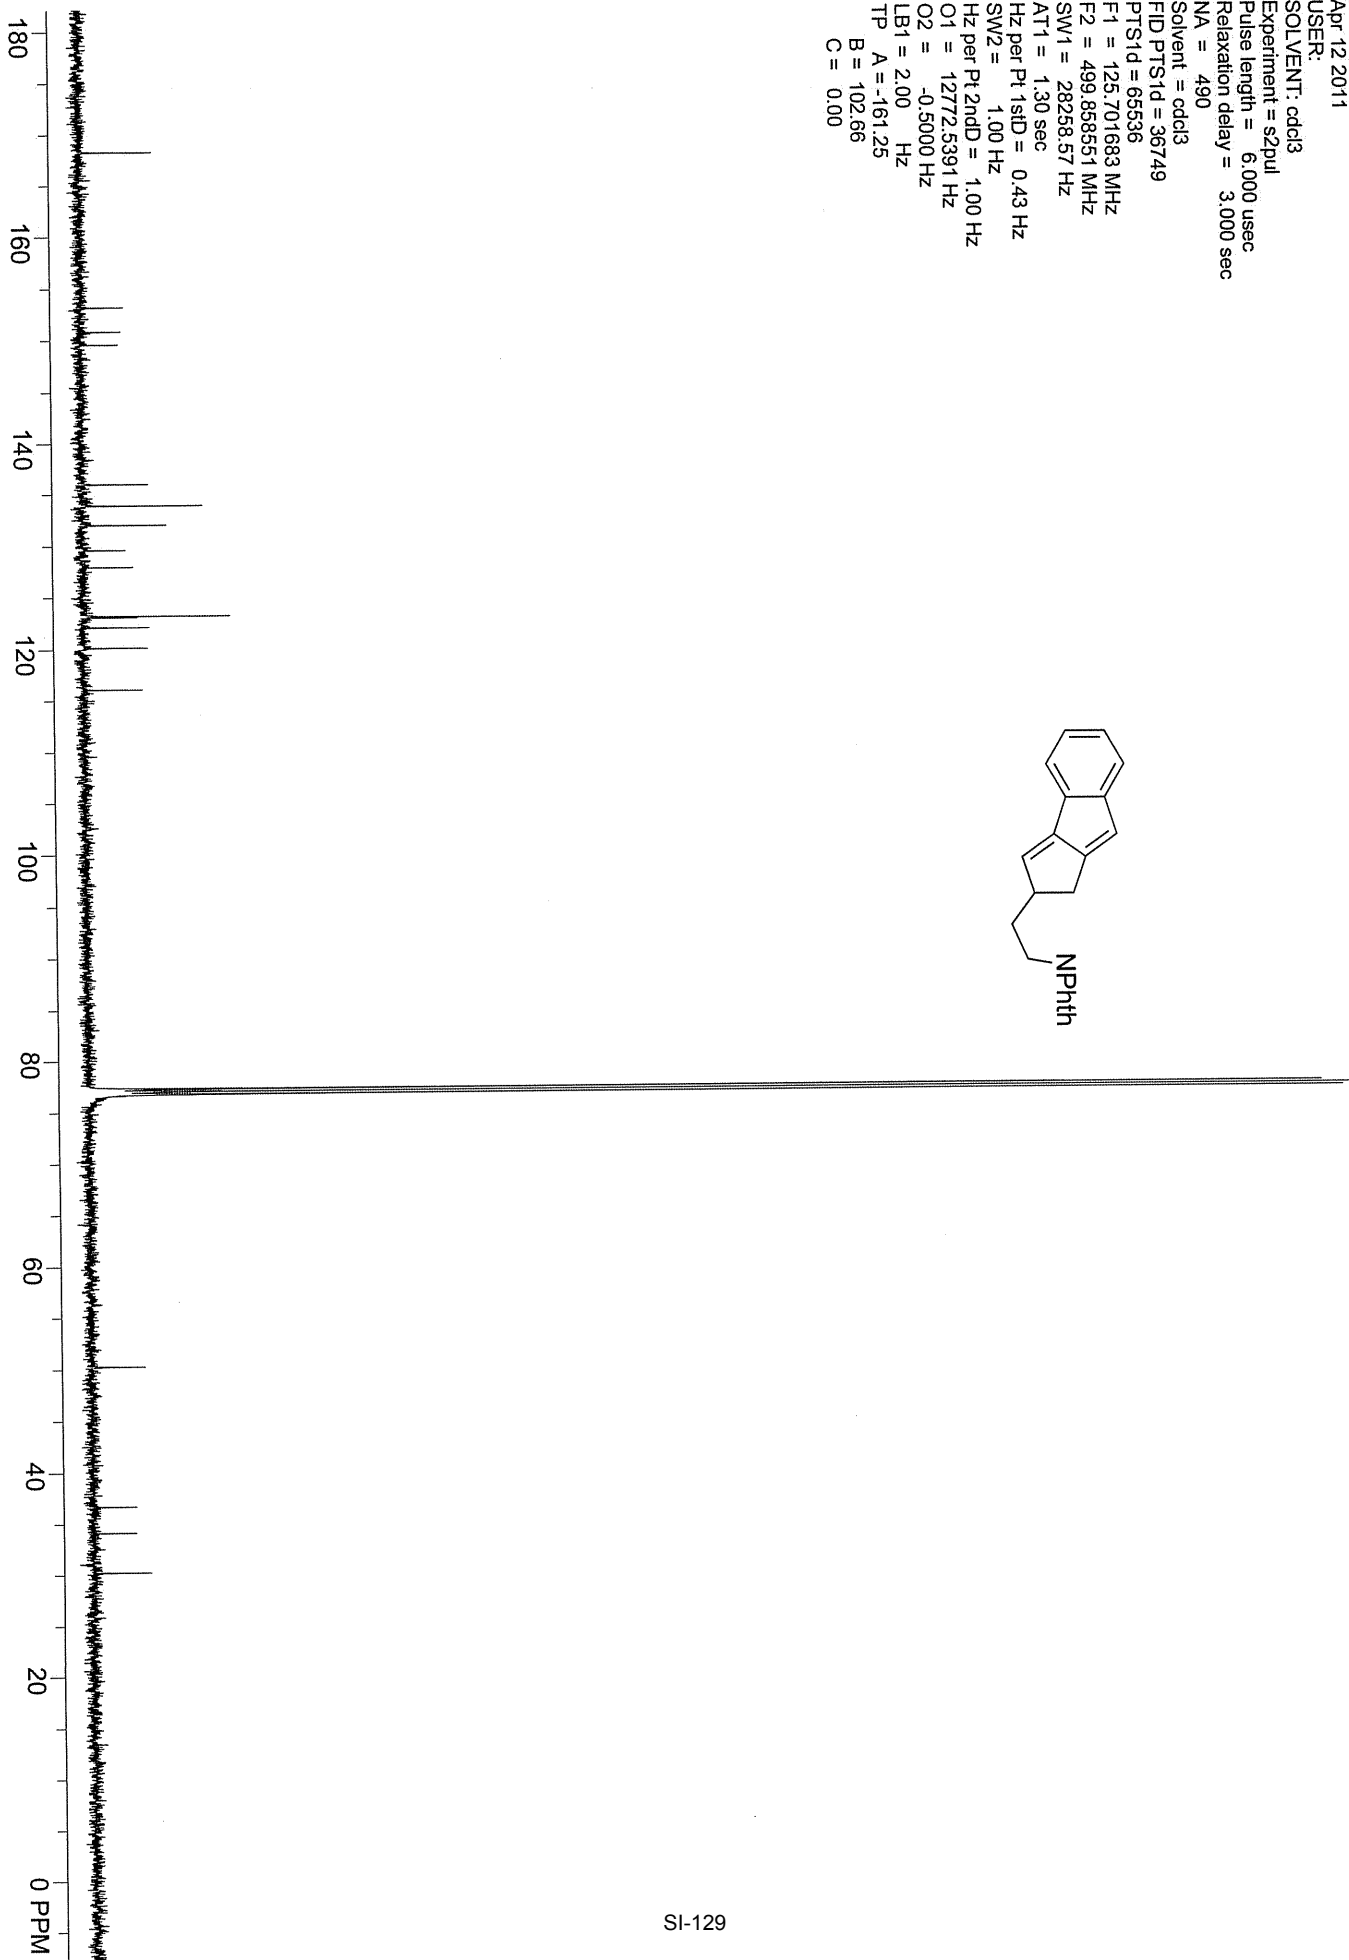

C:\Users\zhanglab1\Desktop\NMR\Ninus 20080731\DATA\yw-5-196-OBn-p.fid

H1\_CDCl3  
May 7 2011

USER:

SOLVENT: CDCl3

Experiment = s2pl

Pulse length = 7.700 usec

Relaxation delay = 4.800 sec

NA = 12

Solvent = CDCl3

FID PTS1d = 21259

PTS1d = 32768

F1 = 499.858551 MHz

F2 = 125.700813 MHz

SW1 = 8503.40 Hz

AT1 = 2.50 sec

HZ per Pt 1sfd = 0.26 Hz

SW2 = 1.00 Hz

HZ per Pt 2ndd = 1.00 Hz

O1 = 2495.7998 Hz

O2 = -0.5000 Hz

LB1 = 0.00 Hz

TP A = 95.71

B = -14.95

C = 0.00

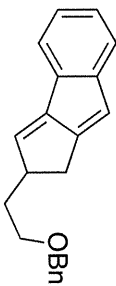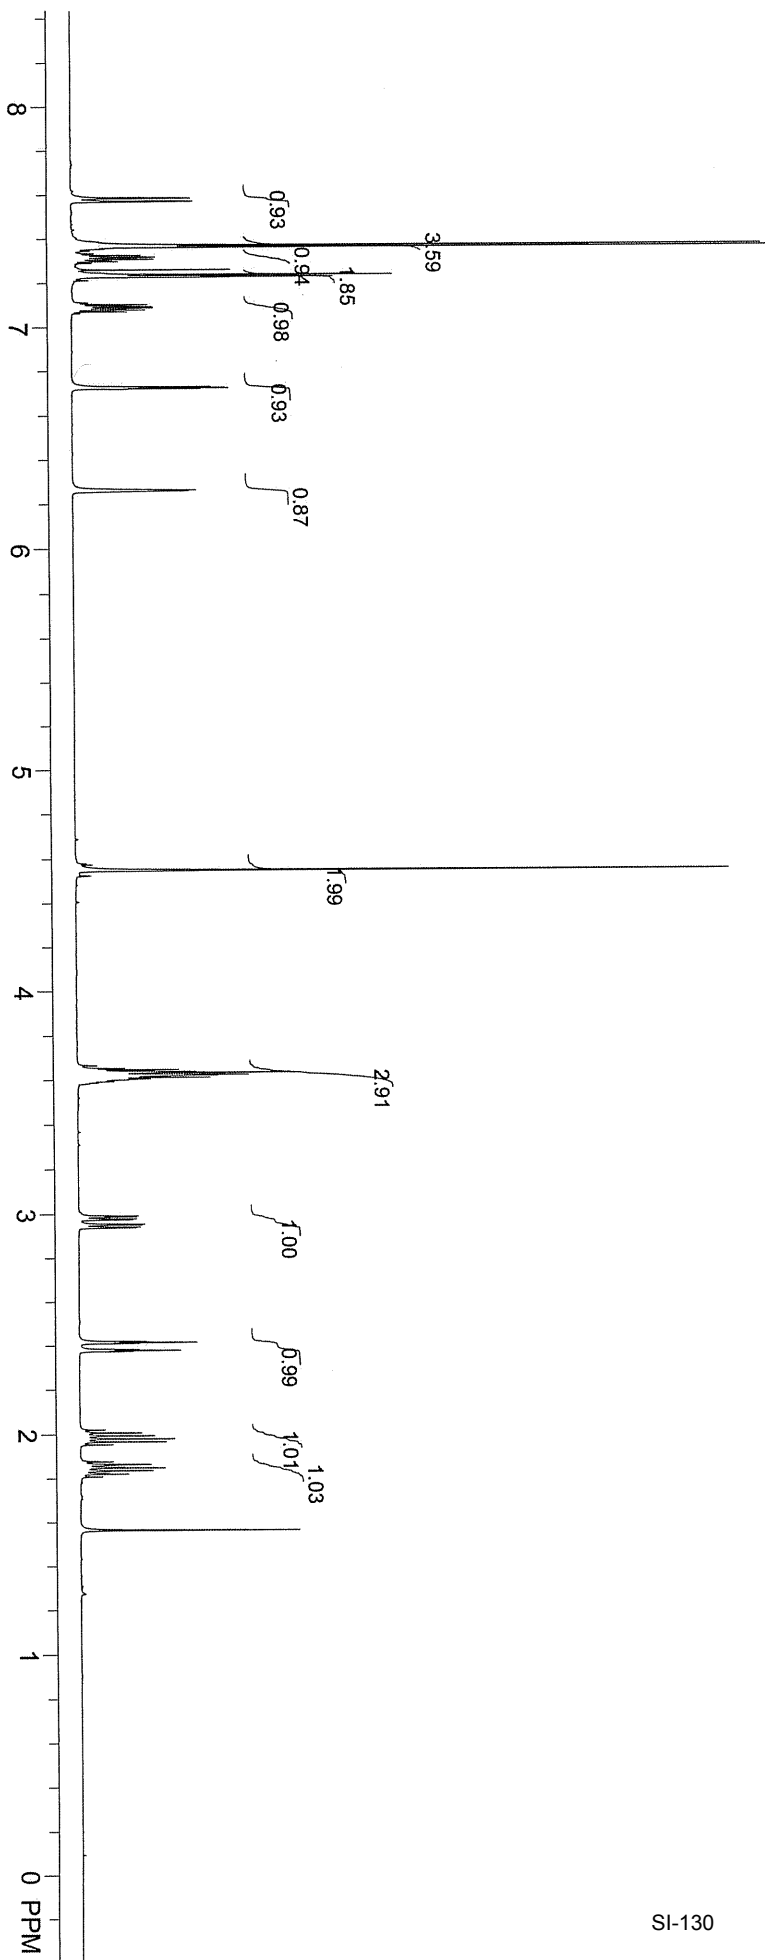

C:\Users\zhanglab1\Desktop\NMR\Nitus 20080731\DATA\yw-5-196-OBn-p-c1.fid  
yw-5-196-OBn-p-c  
May 7 2011

USER:

SOLVENT: cdcl3

Experiment = s2pul

Pulse length = 6.000 usec

Relaxation delay = 3.000 sec

NA = 176

Solvent = cdcl3

FID PTS1d = 36749

PTS1d = 65536

F1 = 125.701683 MHz

F2 = 499.858551 MHz

SW1 = 28258.57 Hz

AT1 = 1.30 sec

Hz per Pt 1SID = 0.43 Hz

SW2 = 1.00 Hz

Hz per Pt 2ndD = 1.00 Hz

O1 = 12769.0908 Hz

O2 = -0.5000 Hz

LB1 = 2.00 Hz

TP A = -198.75

B = 61.88

C = 0.00

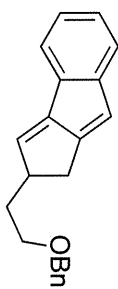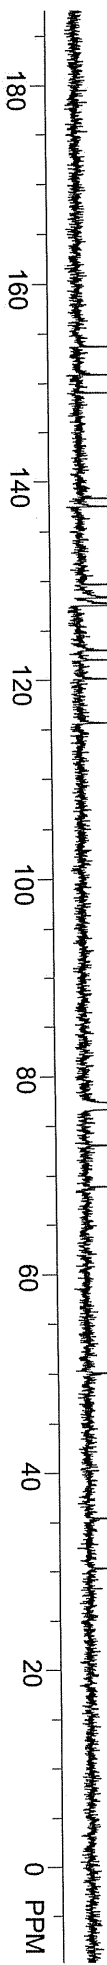

Jun 2 2011

USER:

SOLVENT: cddcl3

Experiment = s2pul

Pulse length = 11.663 usec

Relaxation delay = 4.800 sec

NA = 16

Solvent = cddcl3

FID Pts1d = 20006

PTS1d = 32768

F1 = 399.950684 MHz

F2 = 100.575279 MHz

SW1 = 8002.40 Hz

AT1 = 2.50 sec

Hz per Pt 1sID = 0.24 Hz

SW2 = 1.00 Hz

Hz per Pt 2ndD = 1.00 Hz

O1 = 2006.7504 Hz

O2 = -0.5000 Hz

LB1 = 0.00 Hz

TP A = -54.85

B = -24.46

C = 0.00

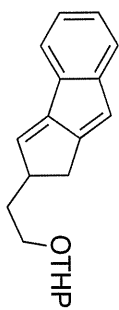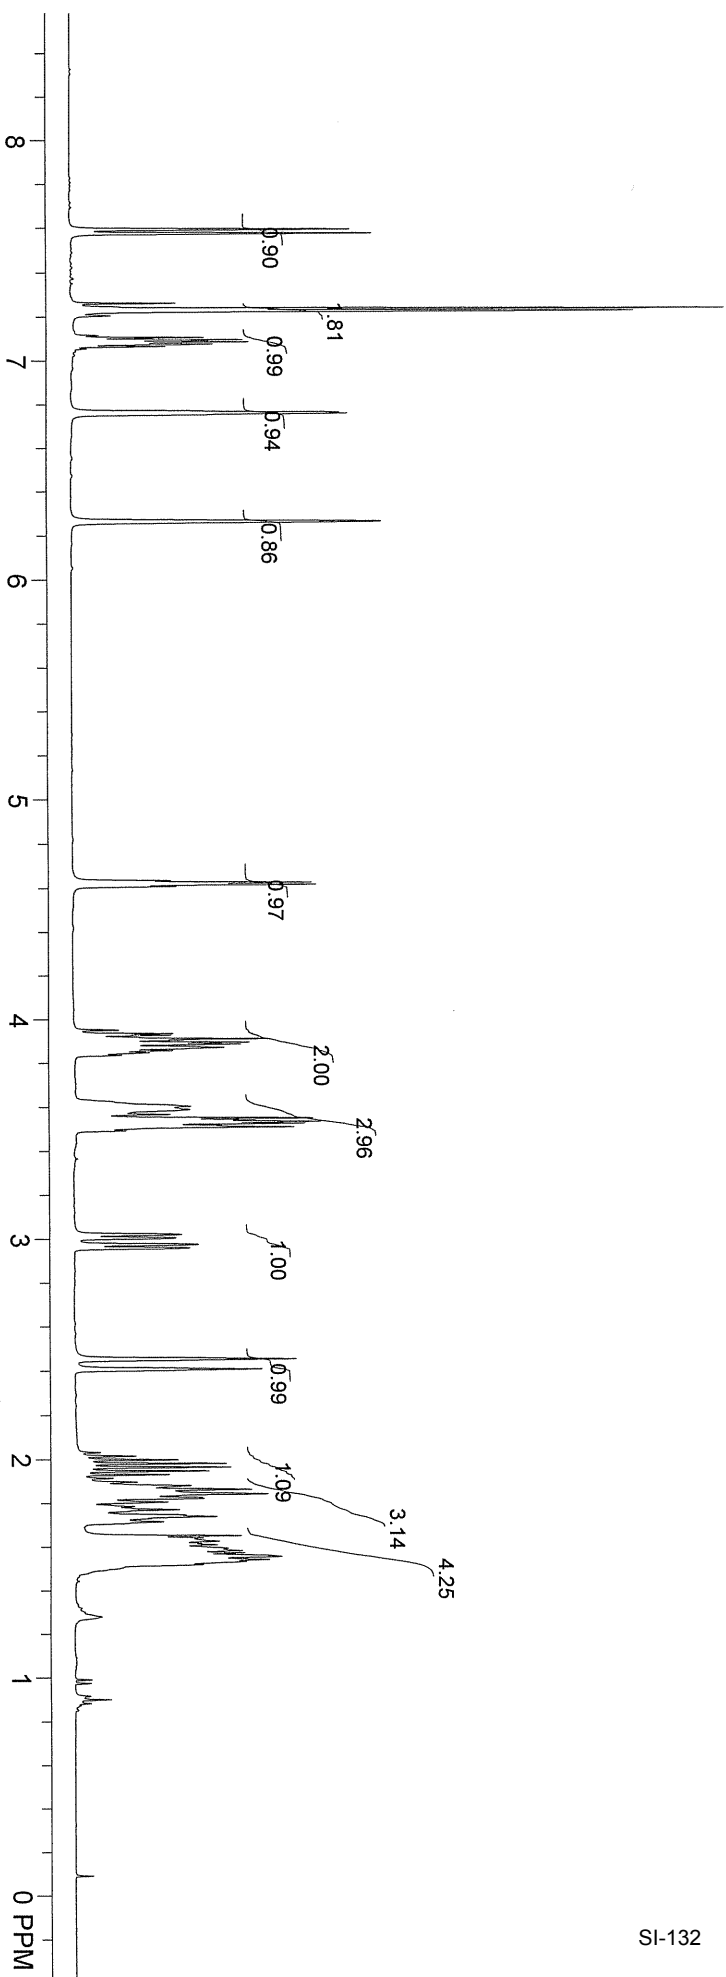

C:\Users\zhanglab1\Desktop\NMR\Nmus 20080731\DATA\Symw-5-297-c2.fid  
Standard c13 run using qnp probe

Jun 2 2011

USER:

SOLVENT: cdcl3

Experiment = szpul

Pulse length = 7.775 usec

Relaxation delay = 1.300 sec

NA = 166

Solvent = cdcl3

FID P1S1d = 28040

PTS1d = 32768

F1 = 100.577232 MHz

F2 = 399.950684 MHz

SW1 = 28040.66 Hz

AT1 = 1.00 sec

Hz per Pt 1s1d = 0.86 Hz

SW2 = 1.00 Hz

Hz per Pt 2ndd = 1.00 Hz

O1 = 10052.9375 Hz

O2 = -0.5000 Hz

LB1 = 2.00 Hz

TP A = 0.00

B = -50.63

C = 0.00

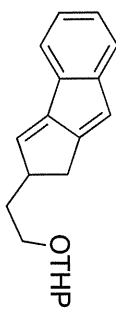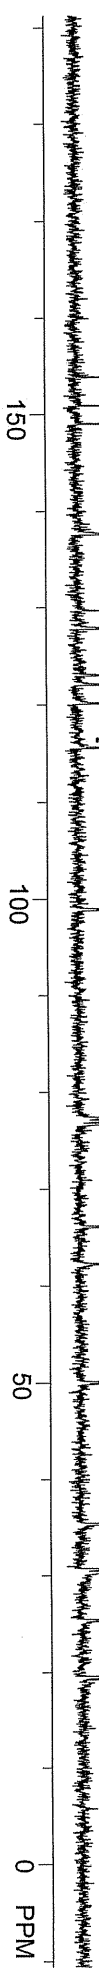

May 22 2011

USER:

SOLVENT: cdcl3

Experiment = s2pul

Pulse length = 11.663 usec

Relaxation delay = 4.800 sec

NA = 10

Solvent = cdcl3

FID.PTS1d = 20006

PTS1d = 32768

F1 = 399.950684 MHz

F2 = 100.575279 MHz

SW1 = 8002.40 Hz

AT1 = 2.50 sec

Hz per Pt 1stD = 0.24 Hz

SW2 = 1.00 Hz

Hz per Pt 2ndD = 1.00 Hz

O1 = 2006.7504 Hz

O2 = -0.5000 Hz

LB1 = 0.00 Hz

TP A = -43.43

B = -35.66

C = 0.00

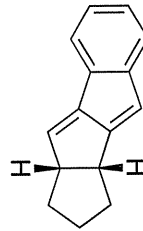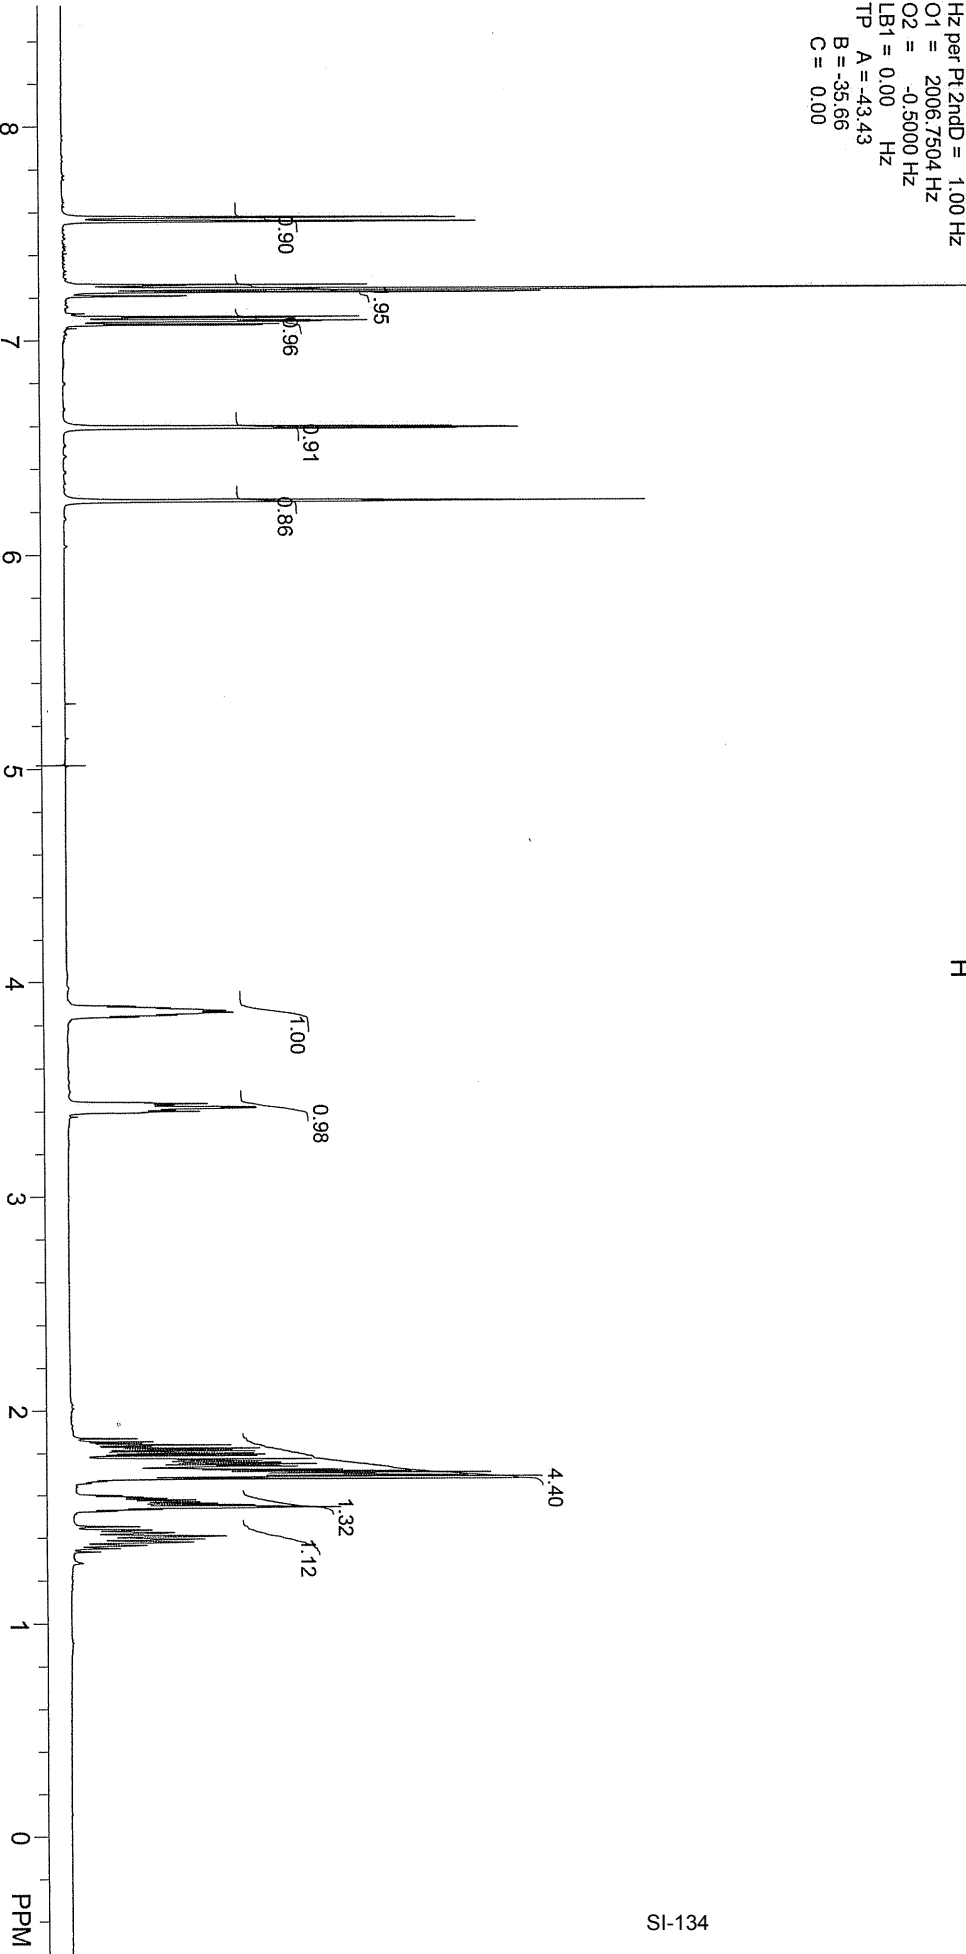

C:\Users\zhanglab1\Desktop\NMR\Ntus 20080731\DATA\yw-5-215-5ring-c1.fid  
Standard c13 run using qnp probe  
May 22 2011

USER:

SOLVENT: cdcl3

Experiment = s2pl

Pulse length = 7.775 usec

Relaxation delay = 1.300 sec

NA = 218

Solvent = cdcl3

FID PTS1d = 28040

PTS1d = 32768

F1 = 100.577232 MHz

F2 = 399.950684 MHz

SW1 = 28040.66 Hz

AT1 = 1.00 sec

HZ per Pt 1s1d = 0.86 Hz

SW2 = 1.00 Hz

HZ per Pt 2ndD = 1.00 Hz

O1 = 10053.7930 Hz

O2 = -0.5000 Hz

LB1 = 2.00 Hz

TP A = -31.88

B = 7.03

C = 0.00

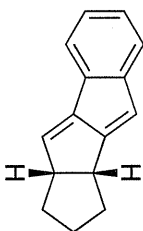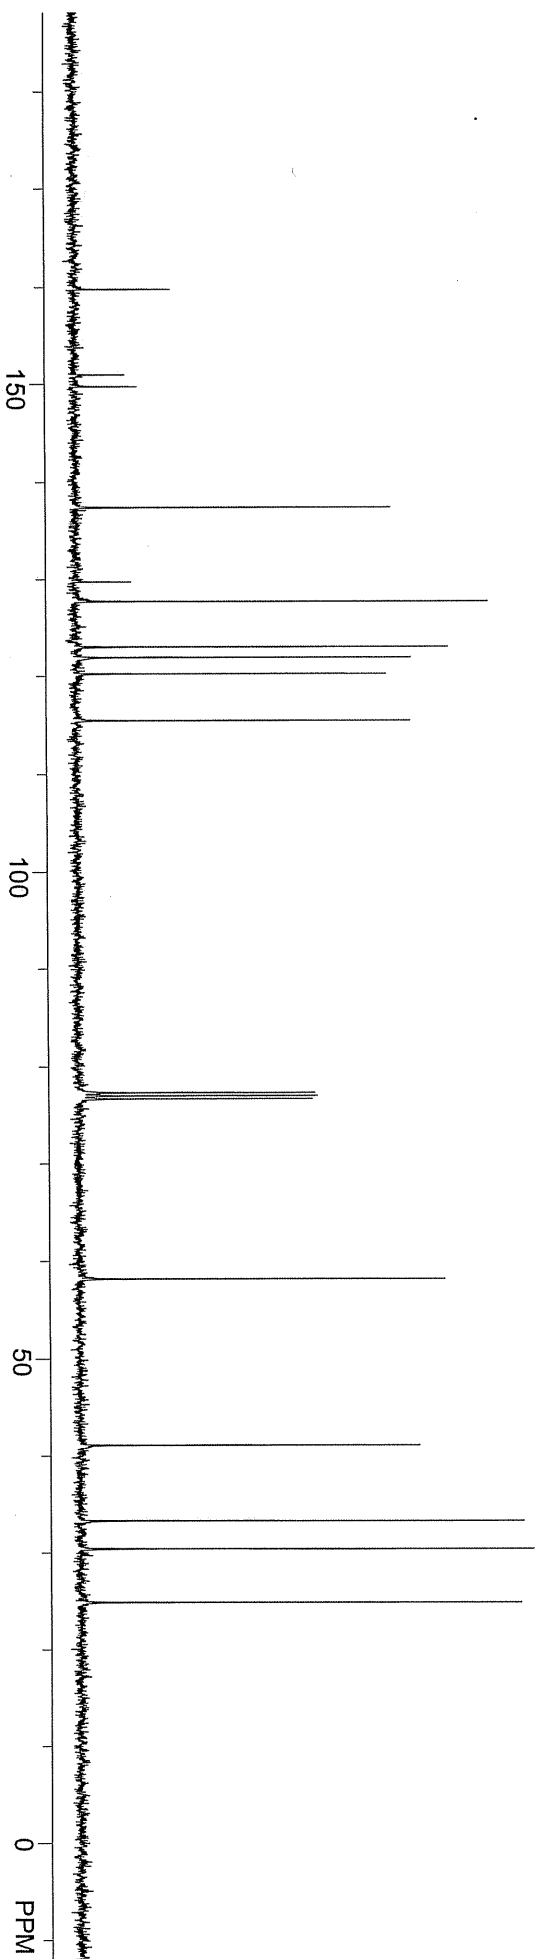

new experiment  
May 20 2011

USER:

SOLVENT: cdcl3

Experiment = szpul

Pulse length = 11.663 usec

Relaxation delay = 4.800 sec

NA = 16

Solvent = cdcl3

FID Pts/D = 20006

PTSD = 32768

F1 = 399.950684 MHz

F2 = 100.575279 MHz

SW1 = 8002.40 Hz

AT1 = 2.50 sec

Hz per Pt 1s/D = 0.24 Hz

SW2 = 1.00 Hz

Hz per Pt 2nd/D = 1.00 Hz

O1 = 2006.2362 Hz

O2 = -0.5000 Hz

LB1 = 0.00 Hz

TP A = -45.46

B = -32.69

C = 0.00

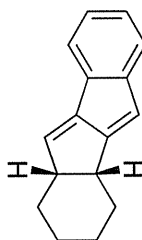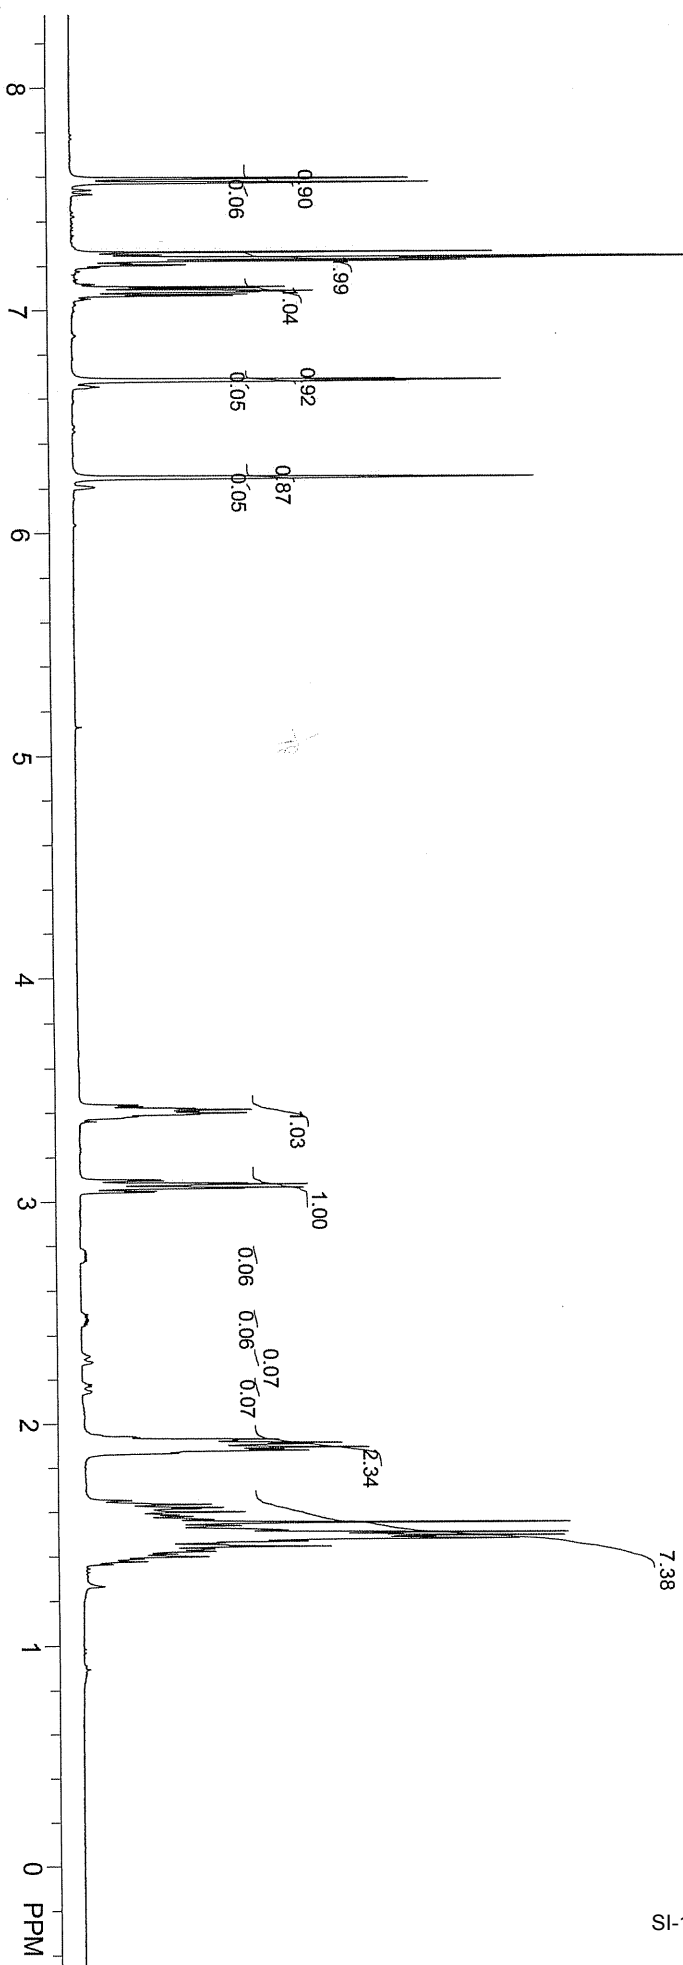



C:\Users\zhanglab1\Desktop\NMR\Nhus 20080731\DATA\5ylw-5-218-c3.fid  
Standard c13 run using qnp probe  
May 20 2011

USER:  
SOLVENT: cdcl3  
Experiment = szpul  
Pulse length = 7.775 usec  
Relaxation delay = 1.300 sec  
NA = 442  
Solvent = cdcl3  
FID P1 = 28040  
PTSD = 32768  
F1 = 100.577232 MHz  
F2 = 399.950684 MHz  
SW1 = 28040.66 Hz  
AT1 = 1.00 sec  
Hz per P1 1stD = 0.86 Hz  
SW2 = 1.00 Hz  
Hz per P1 2ndD = 1.00 Hz  
O1 = 10056.3604 Hz  
O2 = -0.5000 Hz  
LB1 = 2.00 Hz  
TP A = -15.47  
B = -22.50  
C = 0.00

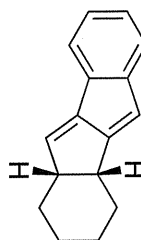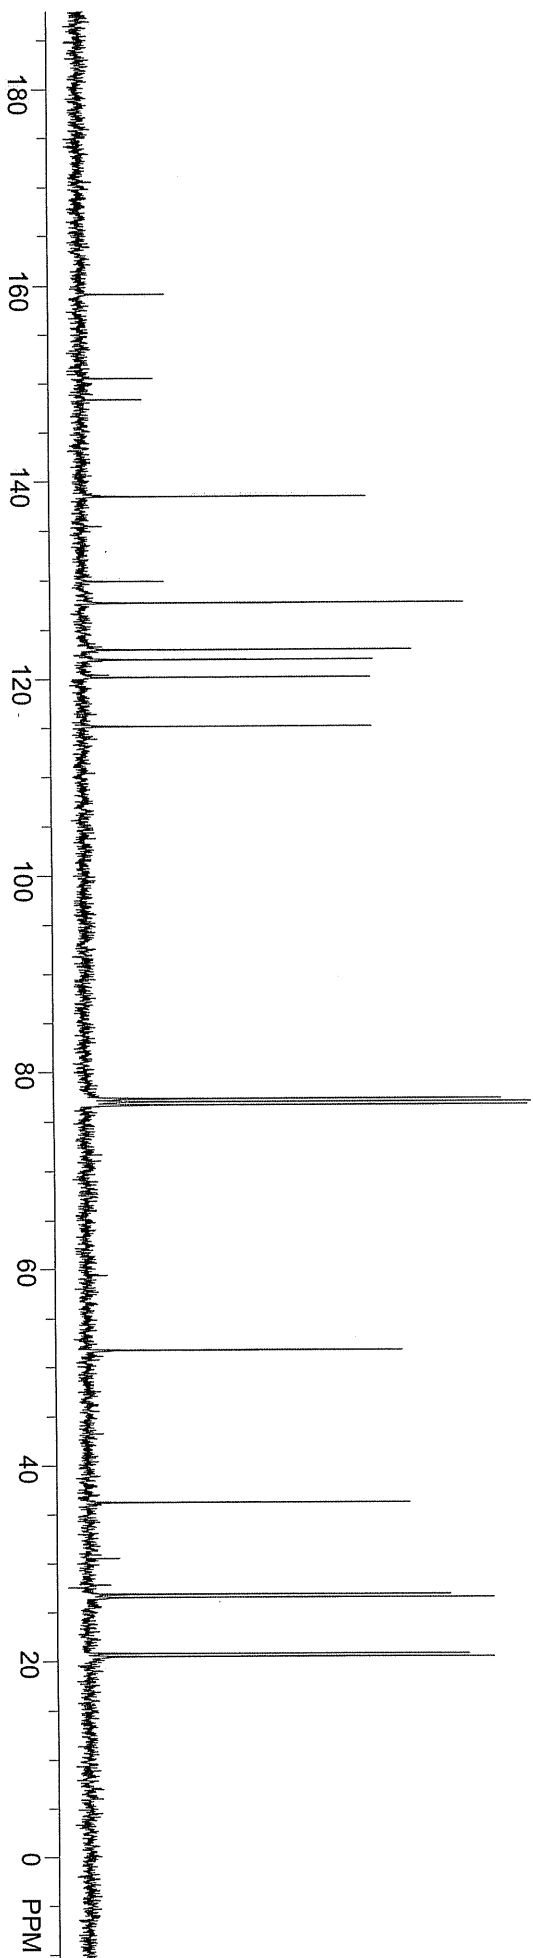

C:\Users\zhanglab1\Desktop\NMR\Ntus 20080731\DATA\5\yw-5-230-h.fid  
new experiment  
May 29 2011

USER:

SOLVENT: cdcl3

Experiment = s2pul

Pulse length = 11.663 usec

Relaxation delay = 4.800 sec

NA = 12

Solvent = cdcl3

FID PTS1d = 20006

PTS1d = 32768

F1 = 399.950684 MHz

F2 = 100.575279 MHz

SW1 = 8002.40 Hz

AT1 = 2.50 sec

Hz per Pt 1SID = 0.24 Hz

SW2 = 1.00 Hz

Hz per Pt 2ndD = 1.00 Hz

O1 = 2006.7504 Hz

O2 = -0.5000 Hz

LB1 = 0.00 Hz

TP A = -46.58

B = -25.77

C = 0.00

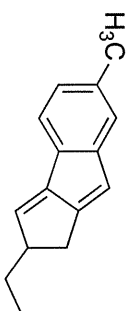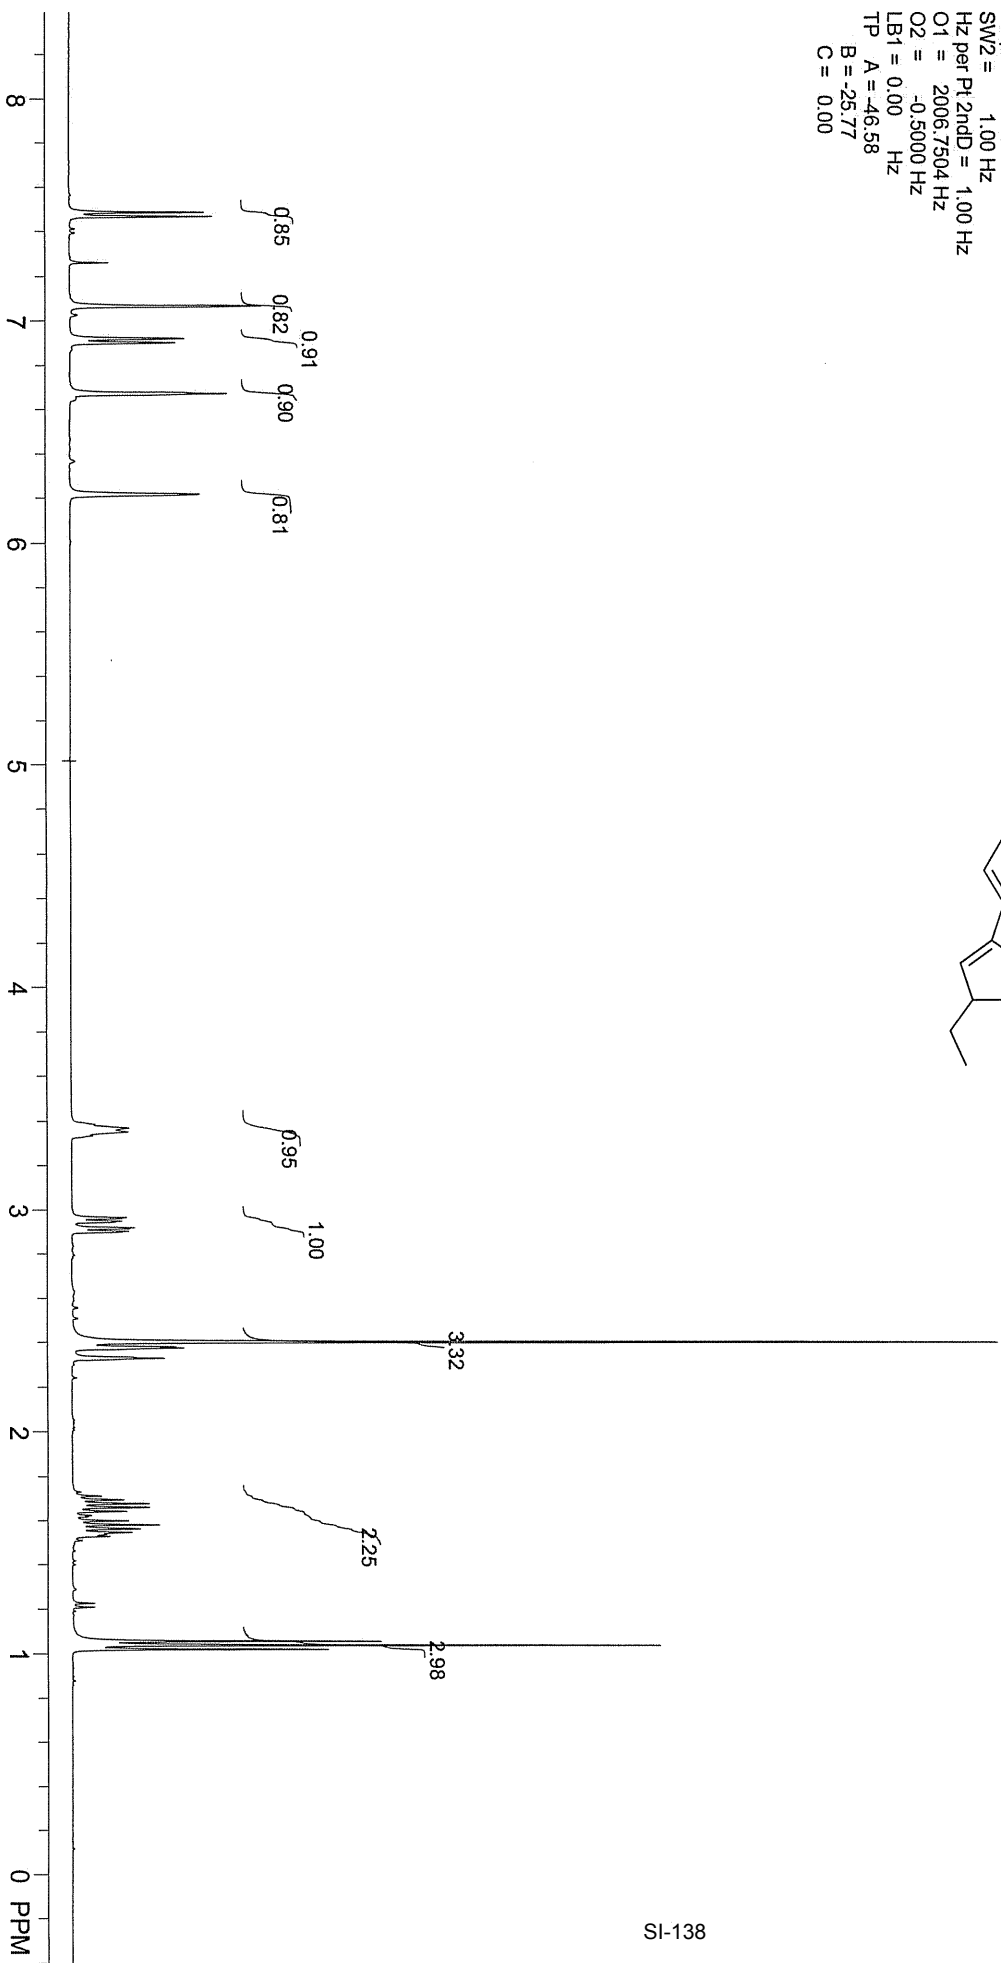

C:\Users\zhanglab1\Desktop\NMR\Nius 20080731\DATA\5\lw-5-230-c2.fid  
Standard c13 run using qnp probe  
May 29 2011

USER:

SOLVENT: cdcl3

Experiment = s2pul

Pulse length = 7.775 usec

Relaxation delay = 1.300 sec

NA = 128

Solvent = cdcl3

FID PTS:fd = 28040

PTS:fd = 32768

F1 = 100.577232 MHz

F2 = 399.950684 MHz

SW1 = 28040.66 Hz

AT1 = 1.00 sec

Hz per Pt 1stD = 0.86 Hz

SW2 = 1.00 Hz

Hz per Pt 2ndD = 1.00 Hz

O1 = 10054.6484 Hz

O2 = -0.5000 Hz

LB1 = 2.00 Hz

TP A = -75.47

B = 47.81

C = 0.00

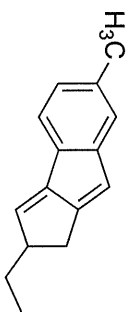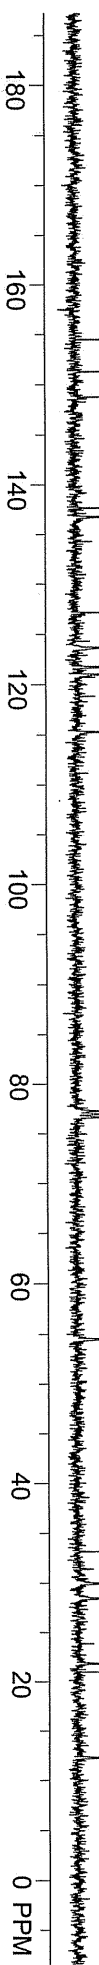

C:\Users\zhanglab1\Desktop\NMR\Ninus 20080731\DATA\5w-5-209-F-h.fid

new experiment  
May 18 2011

USER:

SOLVENT: cdcl3

Experiment = s2pul

Pulse length = 11.663 usec

Relaxation delay = 2.000 sec

NA = 12

Solvent = cdcl3

FID PTS: id = 20006

PTS: id = 32768

F1 = 399.950684 MHz

F2 = 100.575279 MHz

SW1 = 8002.40 Hz

AT1 = 2.50 sec

Hz per Pt 1stD = 0.24 Hz

SW2 = 1.00 Hz

Hz per Pt 2ndD = 1.00 Hz

O1 = 2006.7504 Hz

O2 = -0.5000 Hz

LB1 = 0.00 Hz

TP A = -44.20

B = -35.16

C = 0.00

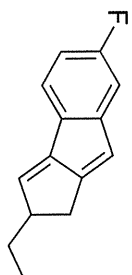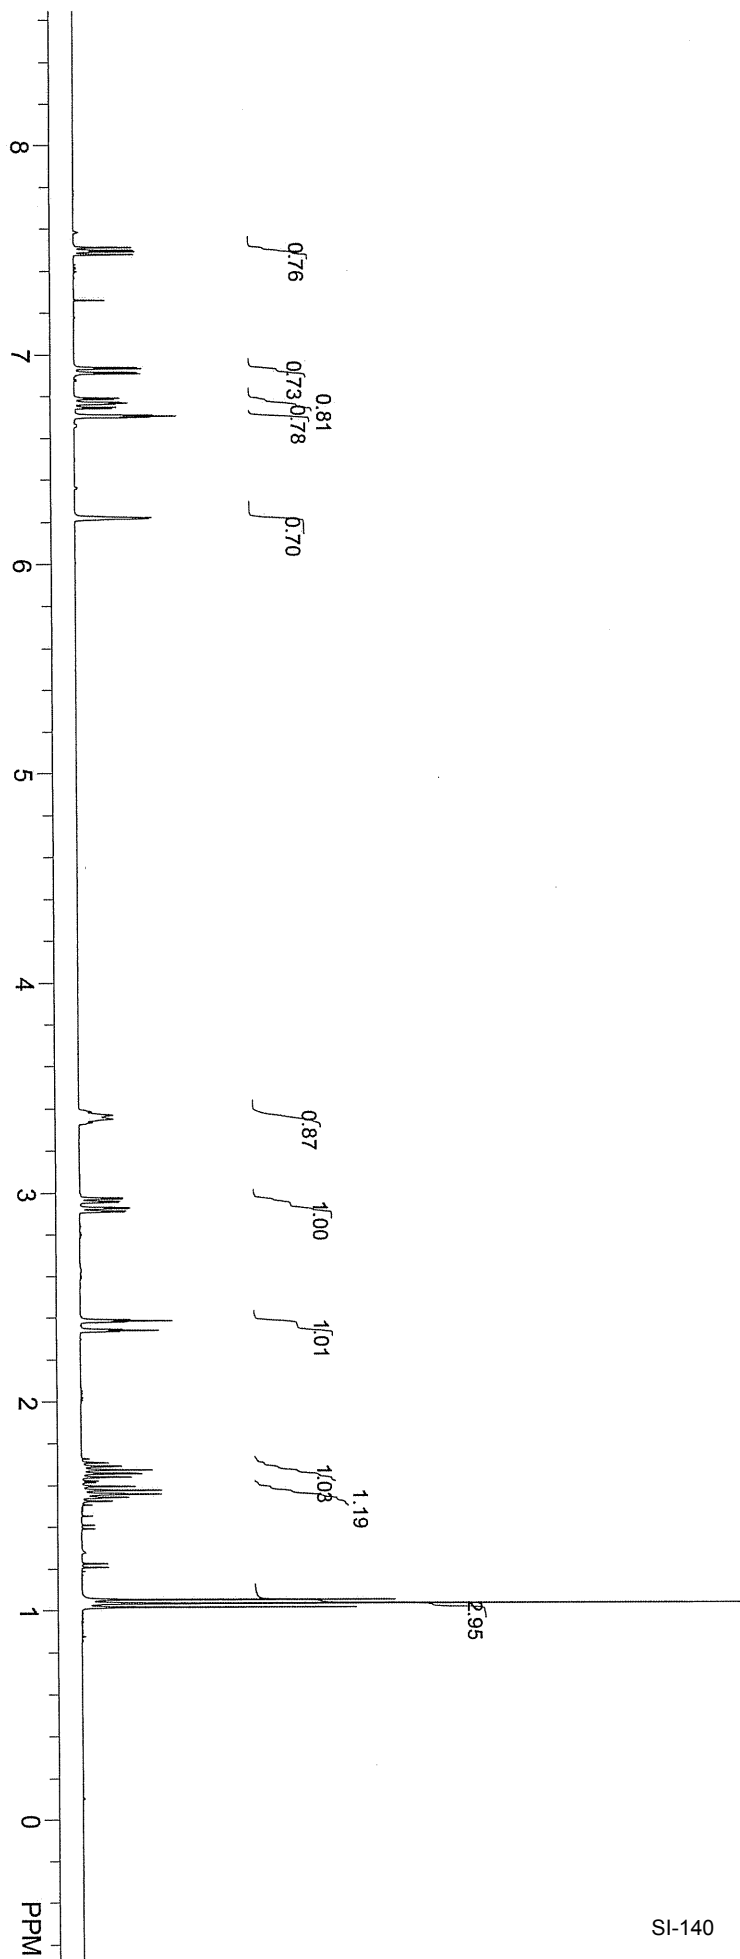

C:\Users\zhanglab1\Desktop\NMR\Ninus 20080731\DATA\5-209-F-c2.fid  
Standard c13 run using qnp probe  
May 18 2011

USER:

SOLVENT: cdcl3

Experiment = s2pul

Pulse length = 7.775 usec

Relaxation delay = 1.300 sec

NA = 176

Solvent = cdcl3

FID PtsId = 28040

PTSId = 32768

F1 = 100.577232 MHz

F2 = 399.950684 MHz

SW1 = 28040.66 Hz

AT1 = 1.00 sec

Hz per Pt 1sfd = 0.86 Hz

SW2 = 1.00 Hz

Hz per Pt 2ndD = 1.00 Hz

O1 = 10053.7930 Hz

O2 = -0.5000 Hz

LB1 = 2.00 Hz

TP A = -25.78

B = 8.44

C = 0.00

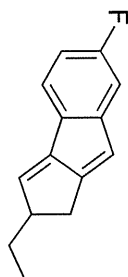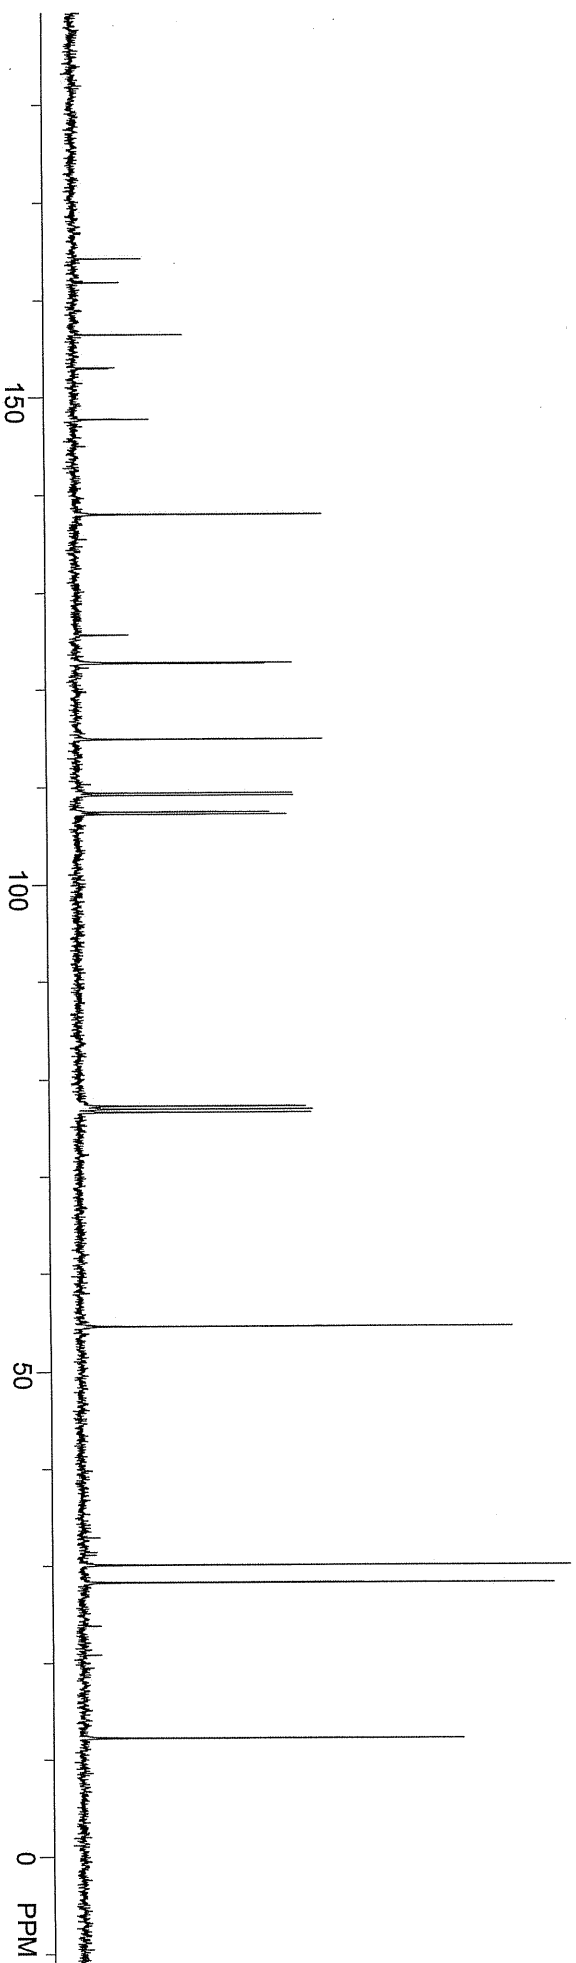

C:\Users\zhanglab1\Desktop\NMR\Ninus 20080731\DATA\5yw-5-224-Cl.h.fid

May 26 2011

USER:

SOLVENT: cdcl3

Experiment = szpul

Pulse length = 11.663 usec

Relaxation delay = 4.800 sec

NA = 12

Solvent = cdcl3

FID PTS1d = 20006

PTS1d = 32768

F1 = 399.950684 MHz

F2 = 100.575279 MHz

SW1 = 8002.40 Hz

AT1 = 2.50 sec

Hz per Pt 1s1D = 0.24 Hz

SW2 = 1.00 Hz

Hz per Pt 2ndD = 1.00 Hz

O1 = 2006.7504 Hz

O2 = -0.5000 Hz

LB1 = 0.00 Hz

TP A = -32.92

B = -46.67

C = 0.00

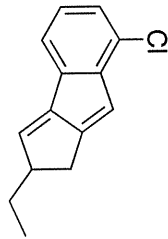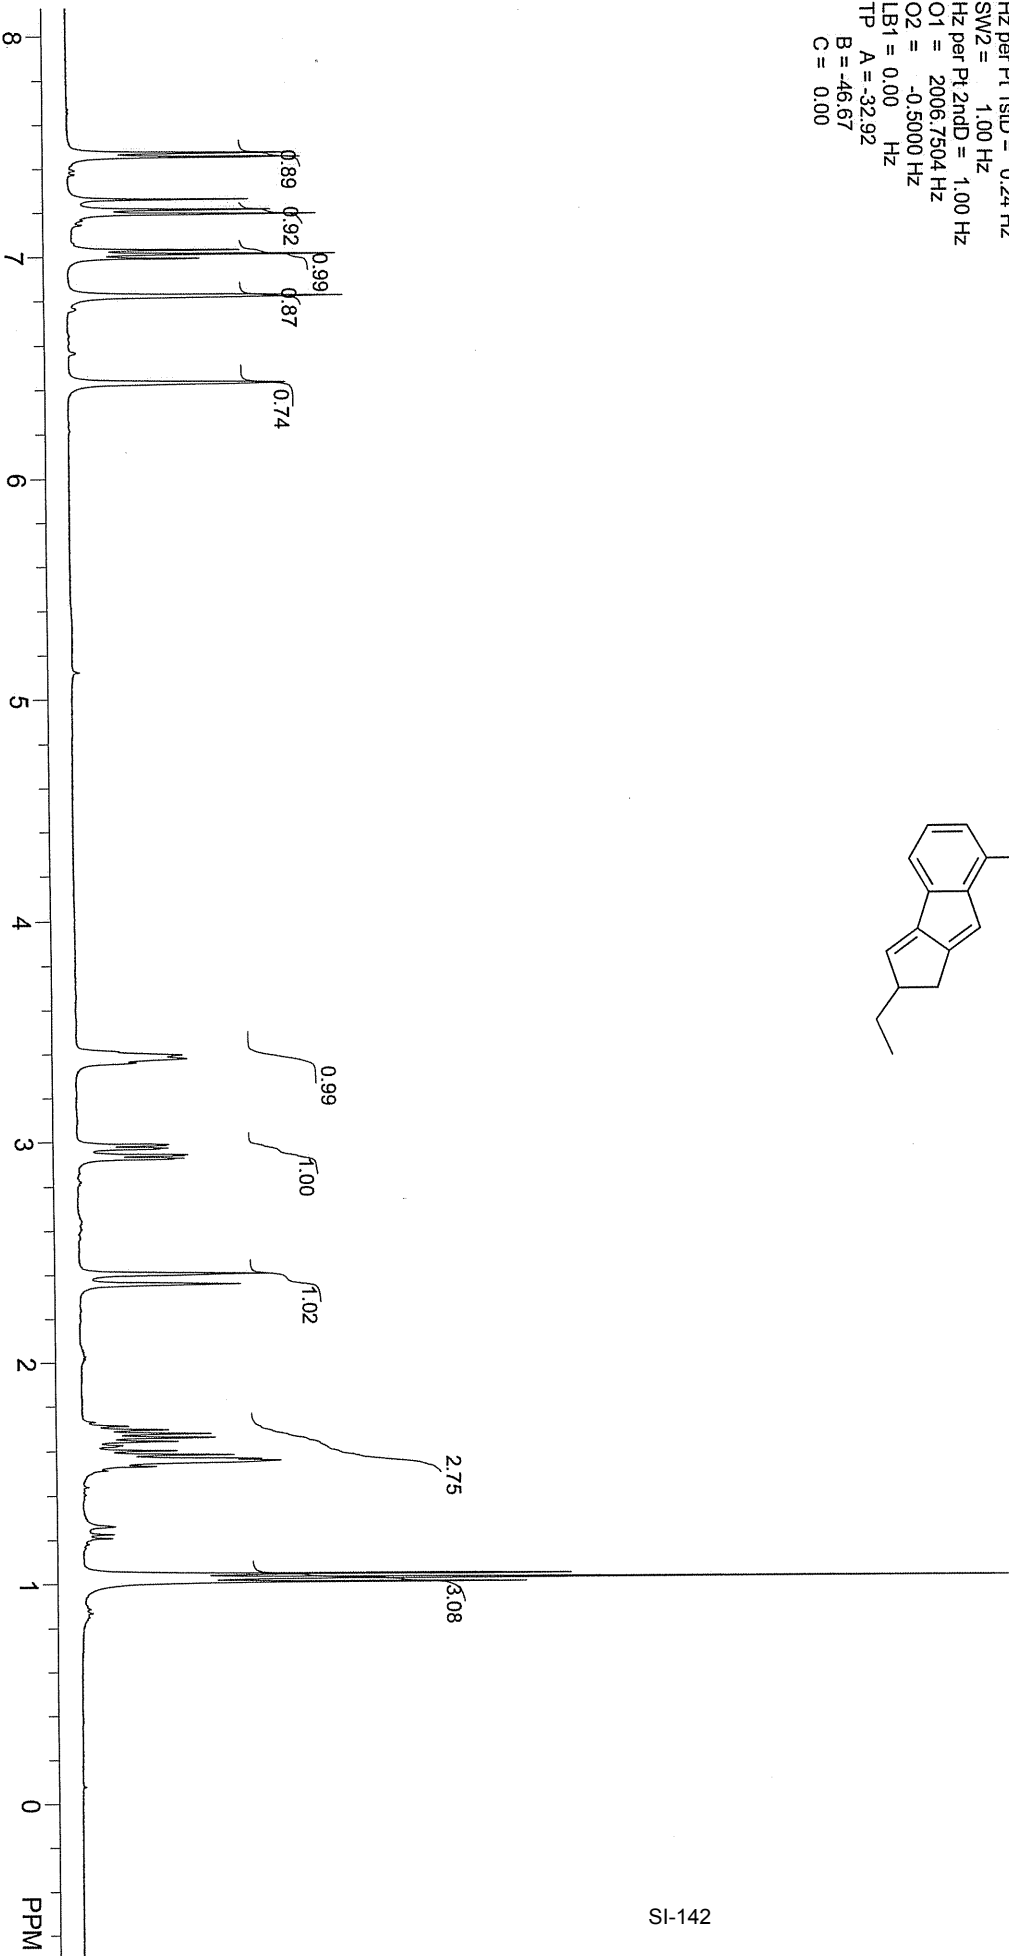

C:\Users\zhanglab1\Desktop\NMRF\Nus 20080731\DATA\syhw-5-224-c2.fid  
Standard c13 run using qnp probe  
May 26 2011

USER:  
SOLVENT: cdcl3  
Experiment = szpul  
Pulse length = 7.775 usec  
Relaxation delay = 1.300 sec  
NA = 1212  
Solvent = cdcl3  
FID P1Std = 28040  
PTStd = 32768  
F1 = 100.577232 MHz  
F2 = 399.950684 MHz  
SW1 = 28040.66 Hz  
AT1 = 1.00 sec  
Hz per P1Std = 0.86 Hz  
SW2 = 1.00 Hz  
Hz per P2ndd = 1.00 Hz  
O1 = 10057.2168 Hz  
O2 = -0.5000 Hz  
LB1 = 2.00 Hz  
TP A = -17.34  
B = -36.56  
C = 0.00

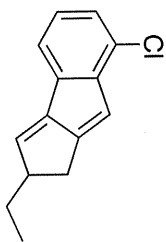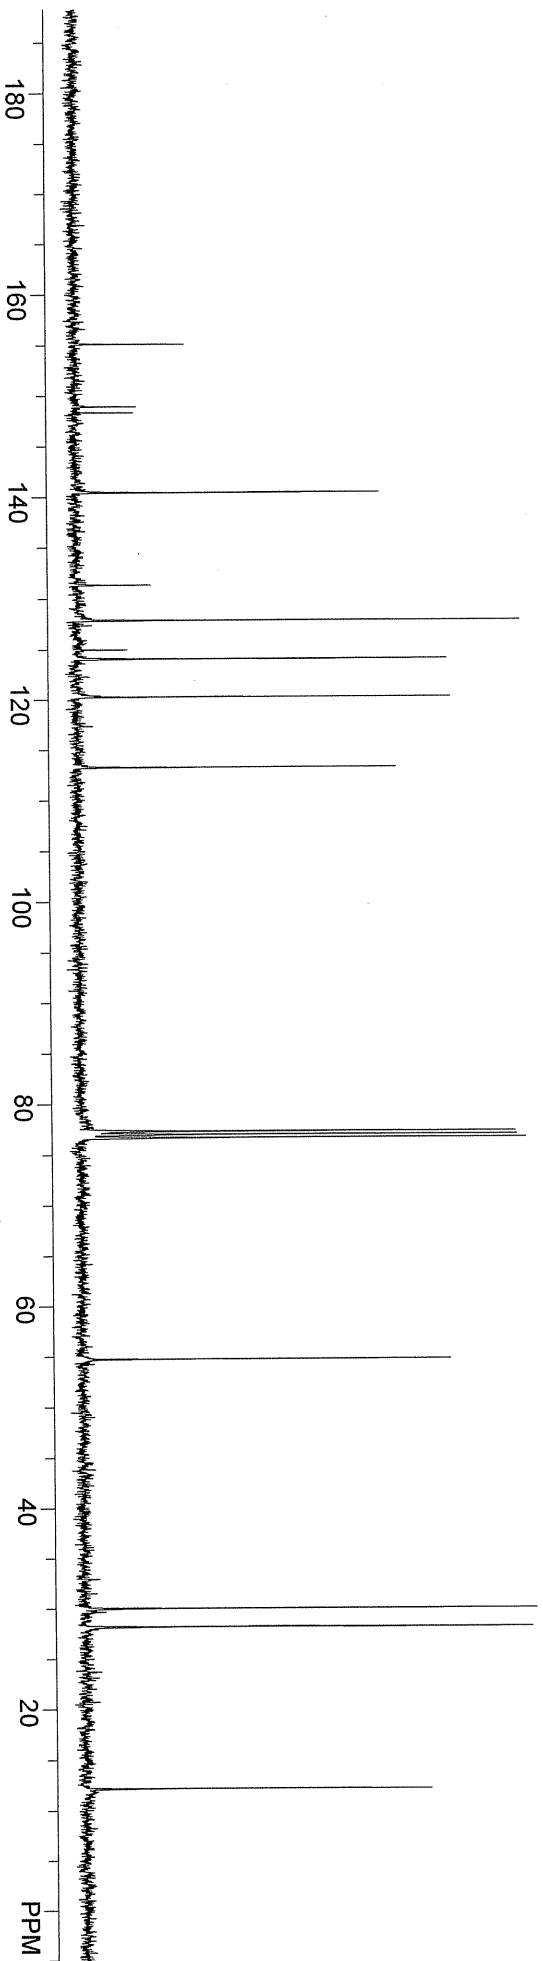

Jun 13 2011

USER:

SOLVENT: cdcl3

Experiment = s2pul

Pulse length = 11.663 usec

Relaxation delay = 4.800 sec

NA = 10

Solvent = cdcl3

FID PTS1d = 20006

PTS1d = 32768

F1 = 399.950684 MHz

F2 = 100.575279 MHz

SW1 = 8002.40 Hz

AT1 = 2.50 sec

Hz per Pt 1sID = 0.24 Hz

SW2 = 1.00 Hz

Hz per Pt 2ndD = 1.00 Hz

O1 = 2006.7504 Hz

O2 = -0.5000 Hz

LB1 = 0.00 Hz

TP A = -43.64

B = -39.89

C = 0.00

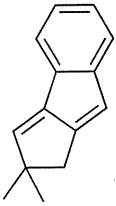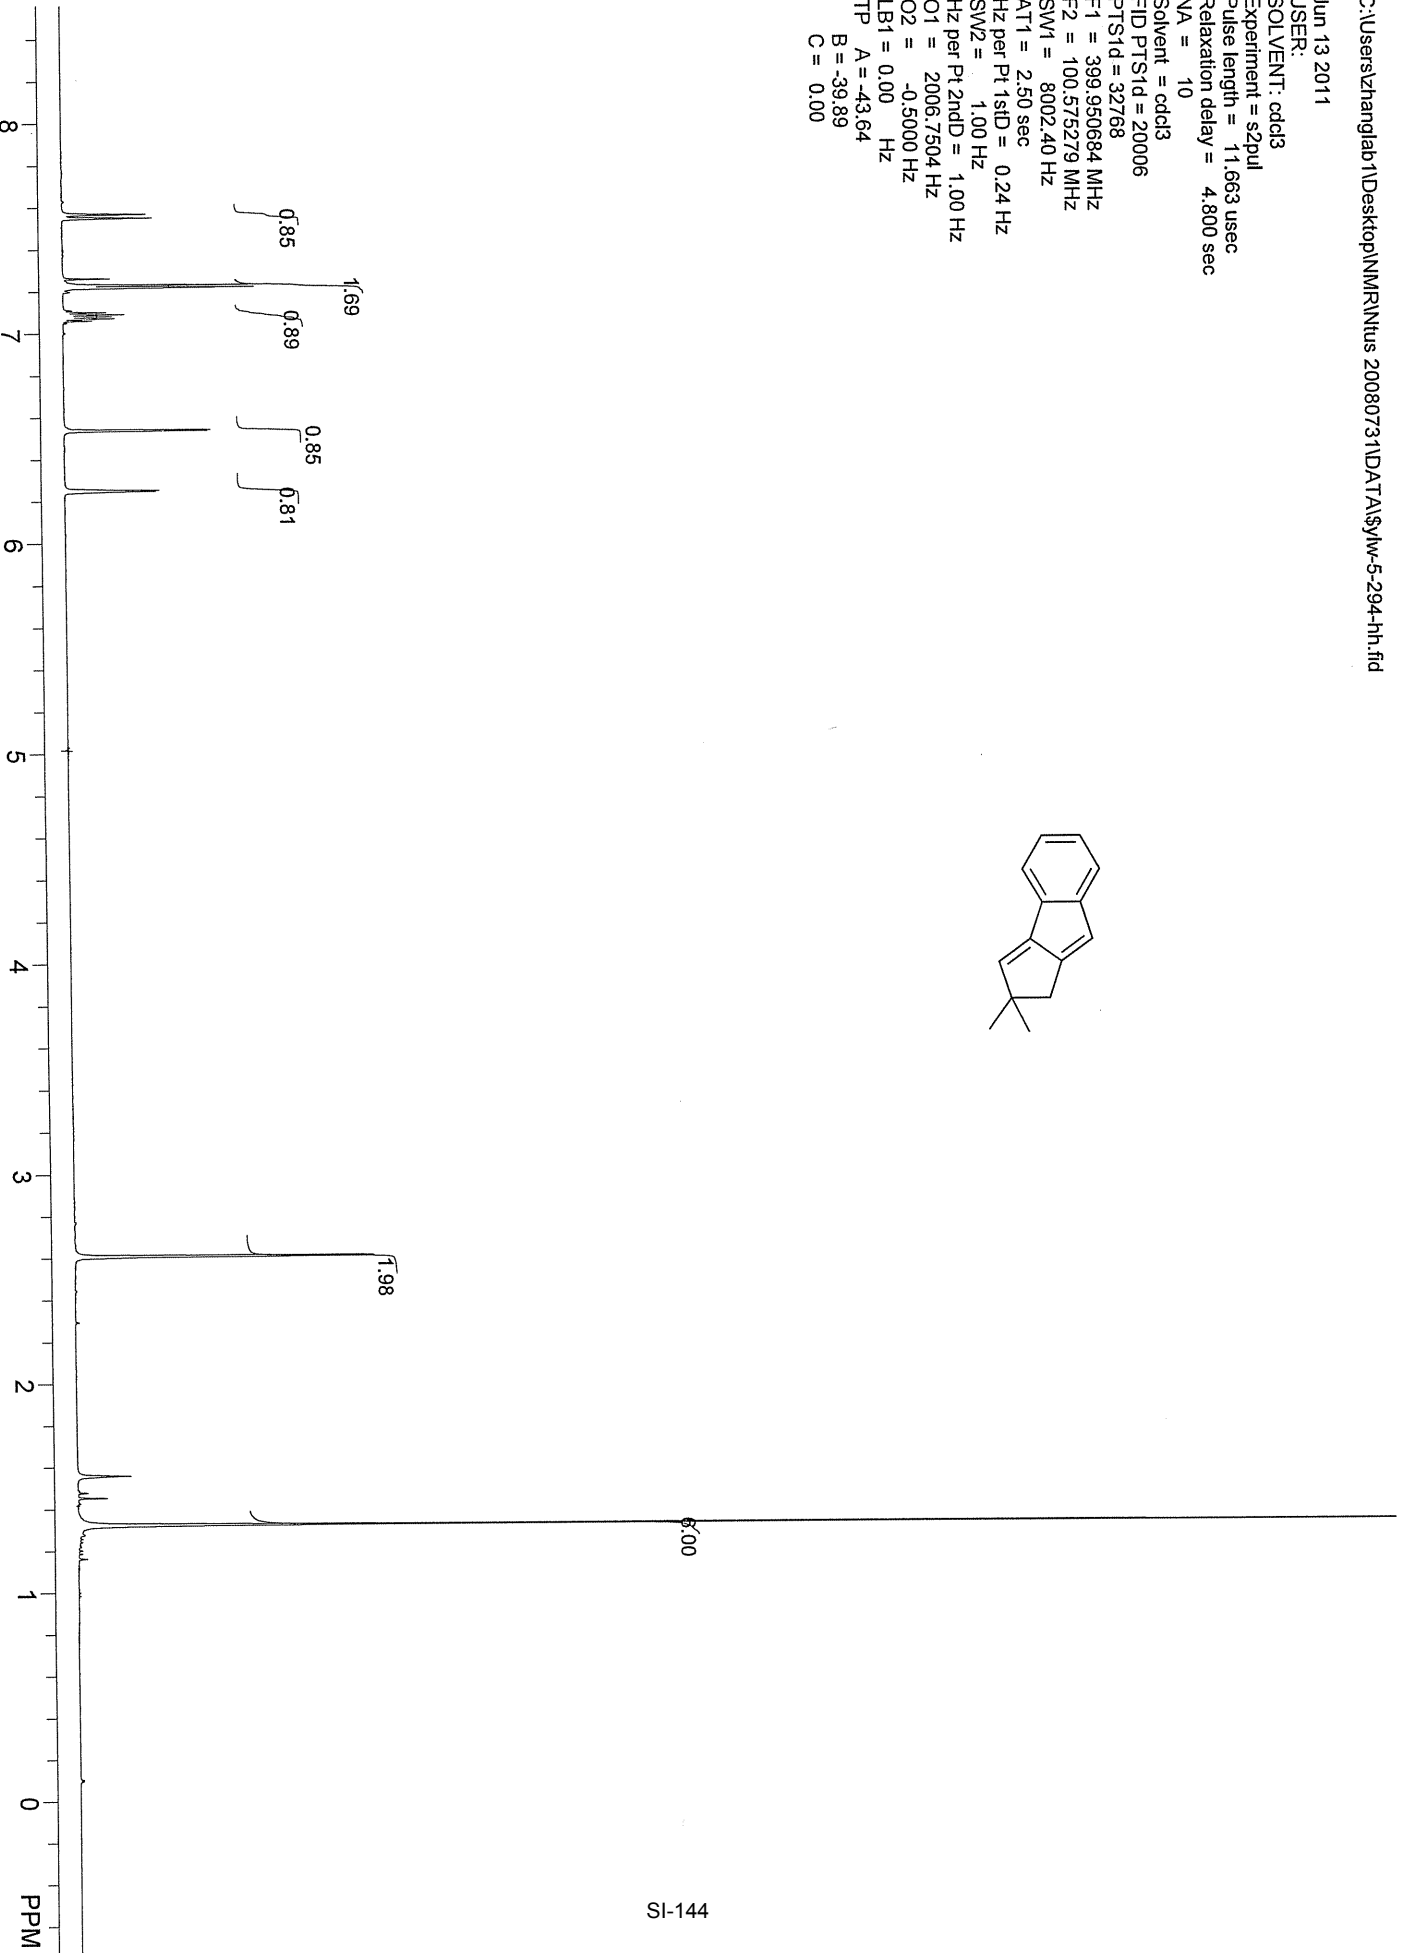



C:\Users\zhanglab1\Desktop\NMR\Nplus 20080731\DATA\$\jw-5-294-c1.fid

Jun 13 2011

USER:

SOLVENT: cdcl3

Experiment = szpul

Pulse length = 7.775 usec

Relaxation delay = 1.300 sec

NA = 150

Solvent = cdcl3

FID PTS1d = 28040

PTS1d = 32768

F1 = 100.577232 MHz

F2 = 399.950684 MHz

SW1 = 28040.66 Hz

AT1 = 1.00 sec

Hz per Pt 1sid = 0.86 Hz

SW2 = 1.00 Hz

Hz per Pt 2ndd = 1.00 Hz

O1 = 10054.6484 Hz

O2 = -0.5000 Hz

LB1 = 2.00 Hz

TP A = -33.05

B = 18.98

C = 0.00

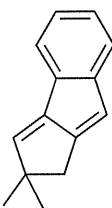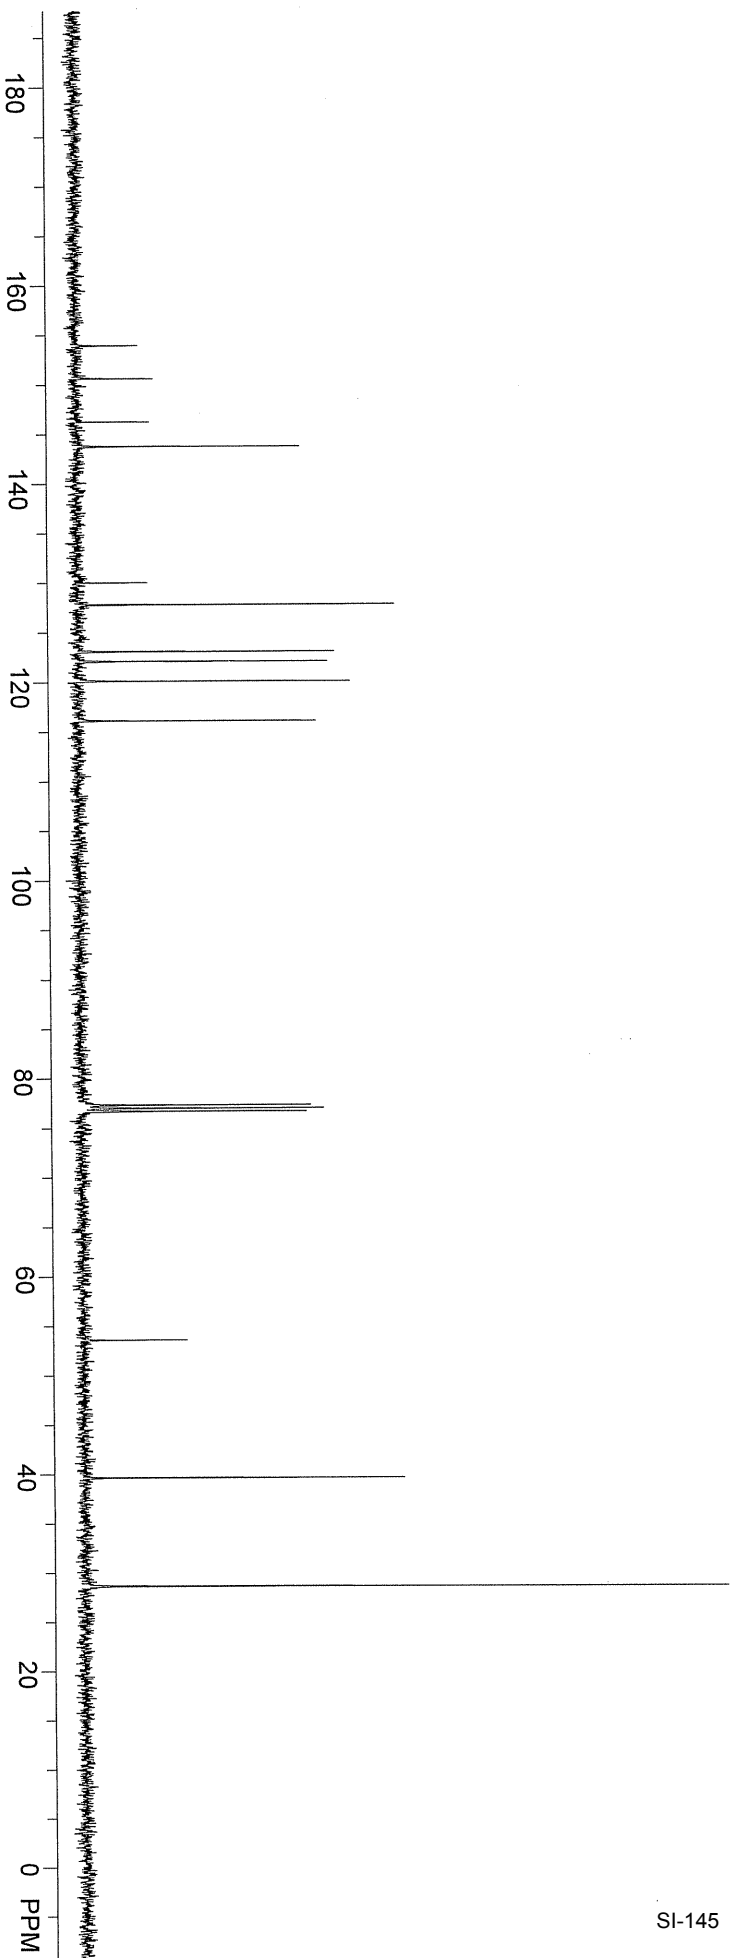

C:\Users\zhanglab1\Desktop\NMR\NMR\Nus 20080731\DATA\5ylw-5-242-h.fid  
new experiment  
Jun 14 2011

USER:

SOLVENT: cdcl3

Experiment = s2pul

Pulse length = 11.663 usec

Relaxation delay = 4.800 sec

NA = 16

Solvent = cdcl3

FID PTS:1d = 20006

PTS:1d = 32768

F1 = 399.950684 MHz

F2 = 100.575279 MHz

SW1 = 8002.40 Hz

AT1 = 2.50 sec

Hz per Pt 1SD = 0.24 Hz

SW2 = 1.00 Hz

Hz per Pt 2ndD = 1.00 Hz

O1 = 2006.7504 Hz

O2 = -0.5000 Hz

LB1 = 0.00 Hz

TP A = -41.45

B = -41.77

C = 0.00

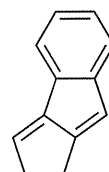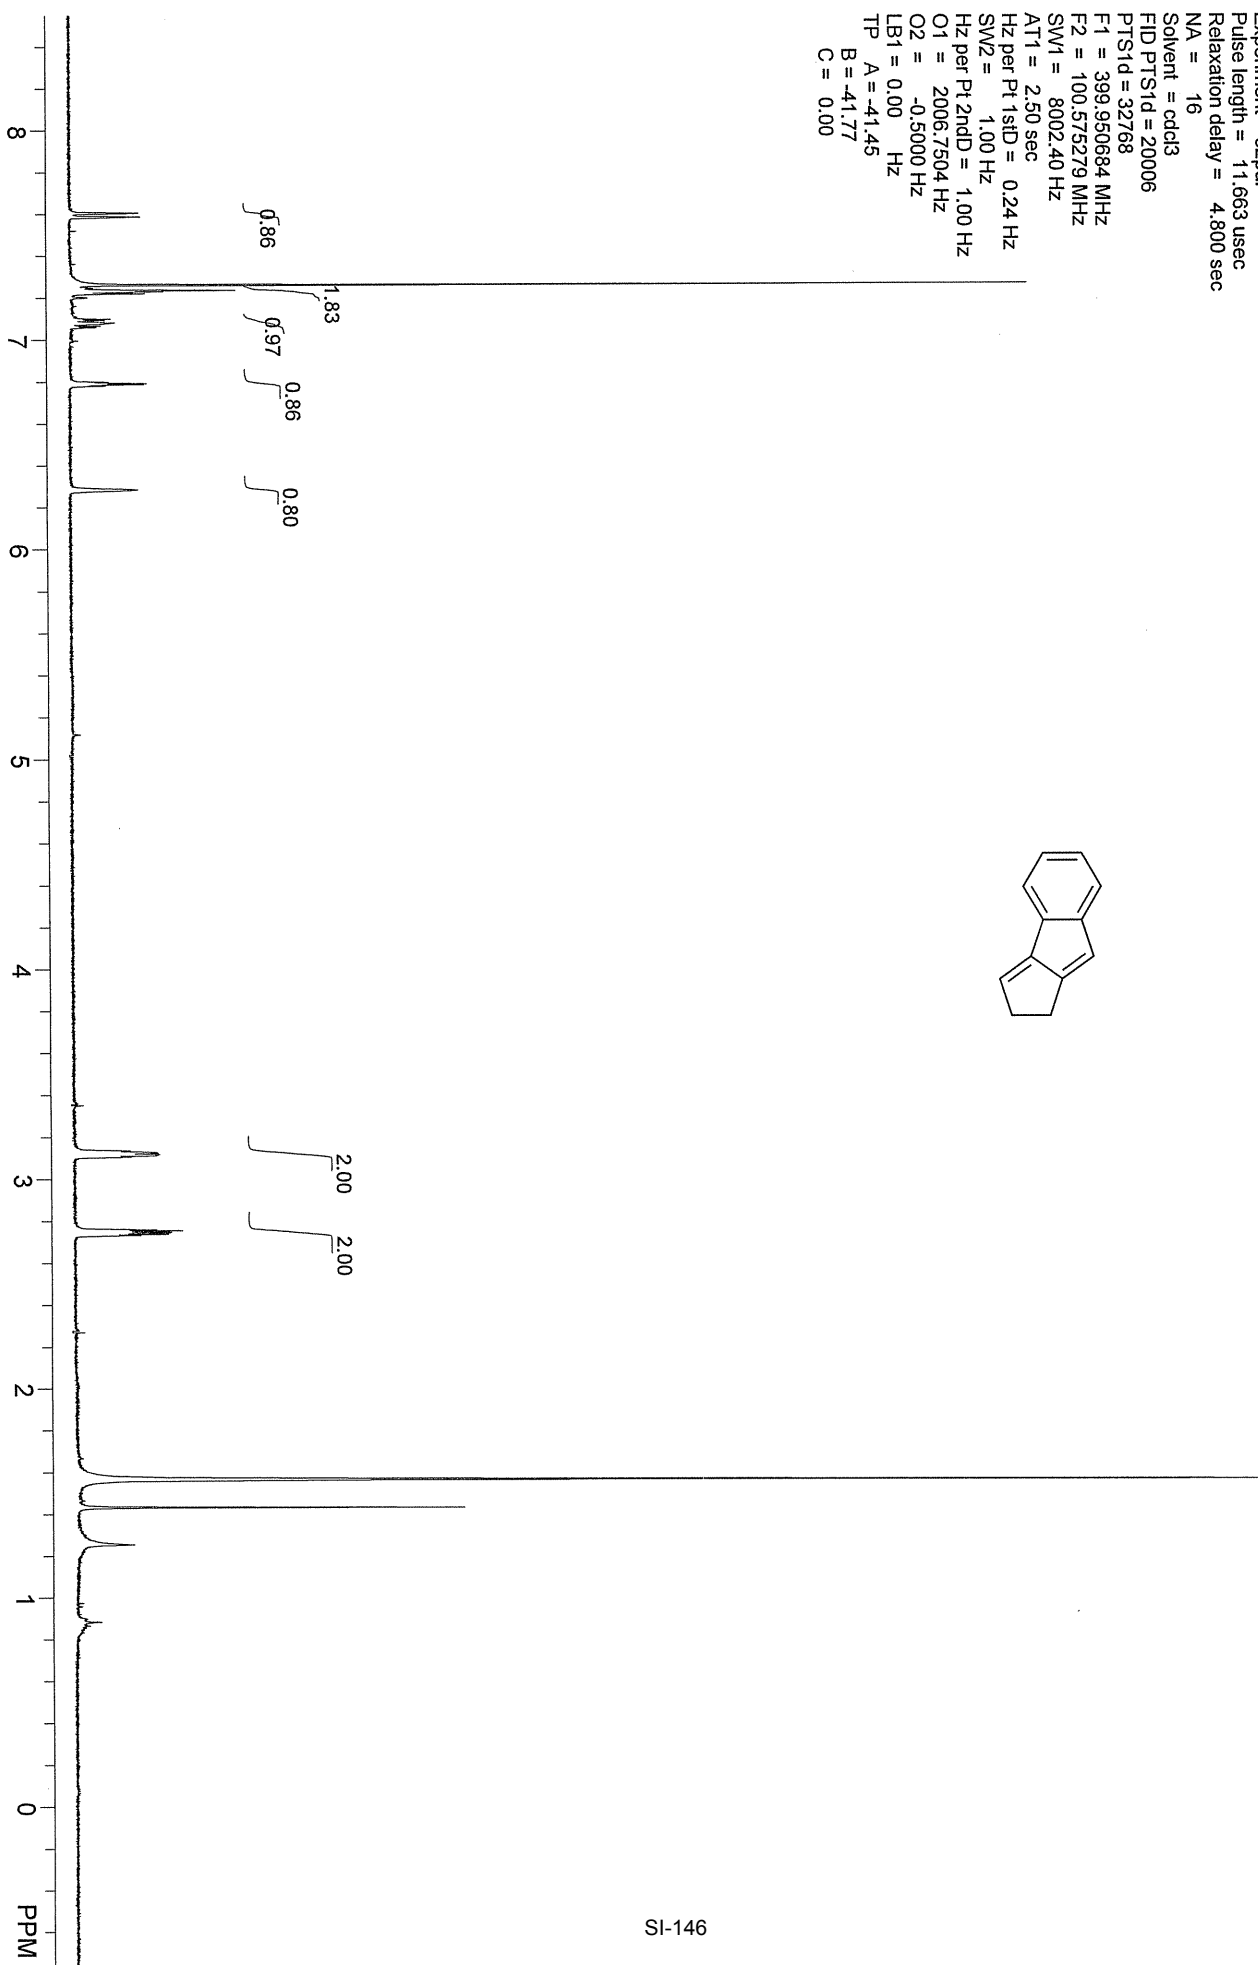

C:\Users\zhanglab1\Desktop\NMR\Nus 20080731\DATA\Jw-5-242-c1.fid  
Standard c13 run using qnp probe  
Jun 14 2011

USER:

SOLVENT: cdcl3

Experiment = s2pul

Pulse length = 7.775 usec

Relaxation delay = 1.300 sec

NA = 18620

Solvent = cdcl3

FID P1 = 28040

PT1 = 32768

F1 = 100.577232 MHz

F2 = 399.950684 MHz

SW1 = 28040.66 Hz

AT1 = 1.00 sec

Hz per Pt 1sID = 0.86 Hz

SW2 = 1.00 Hz

Hz per Pt 2ndD = 1.00 Hz

O1 = 10071.4883 Hz

O2 = -0.5000 Hz

LB1 = 2.00 Hz

TP A = 20.63

B = -75.94

C = 0.00

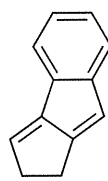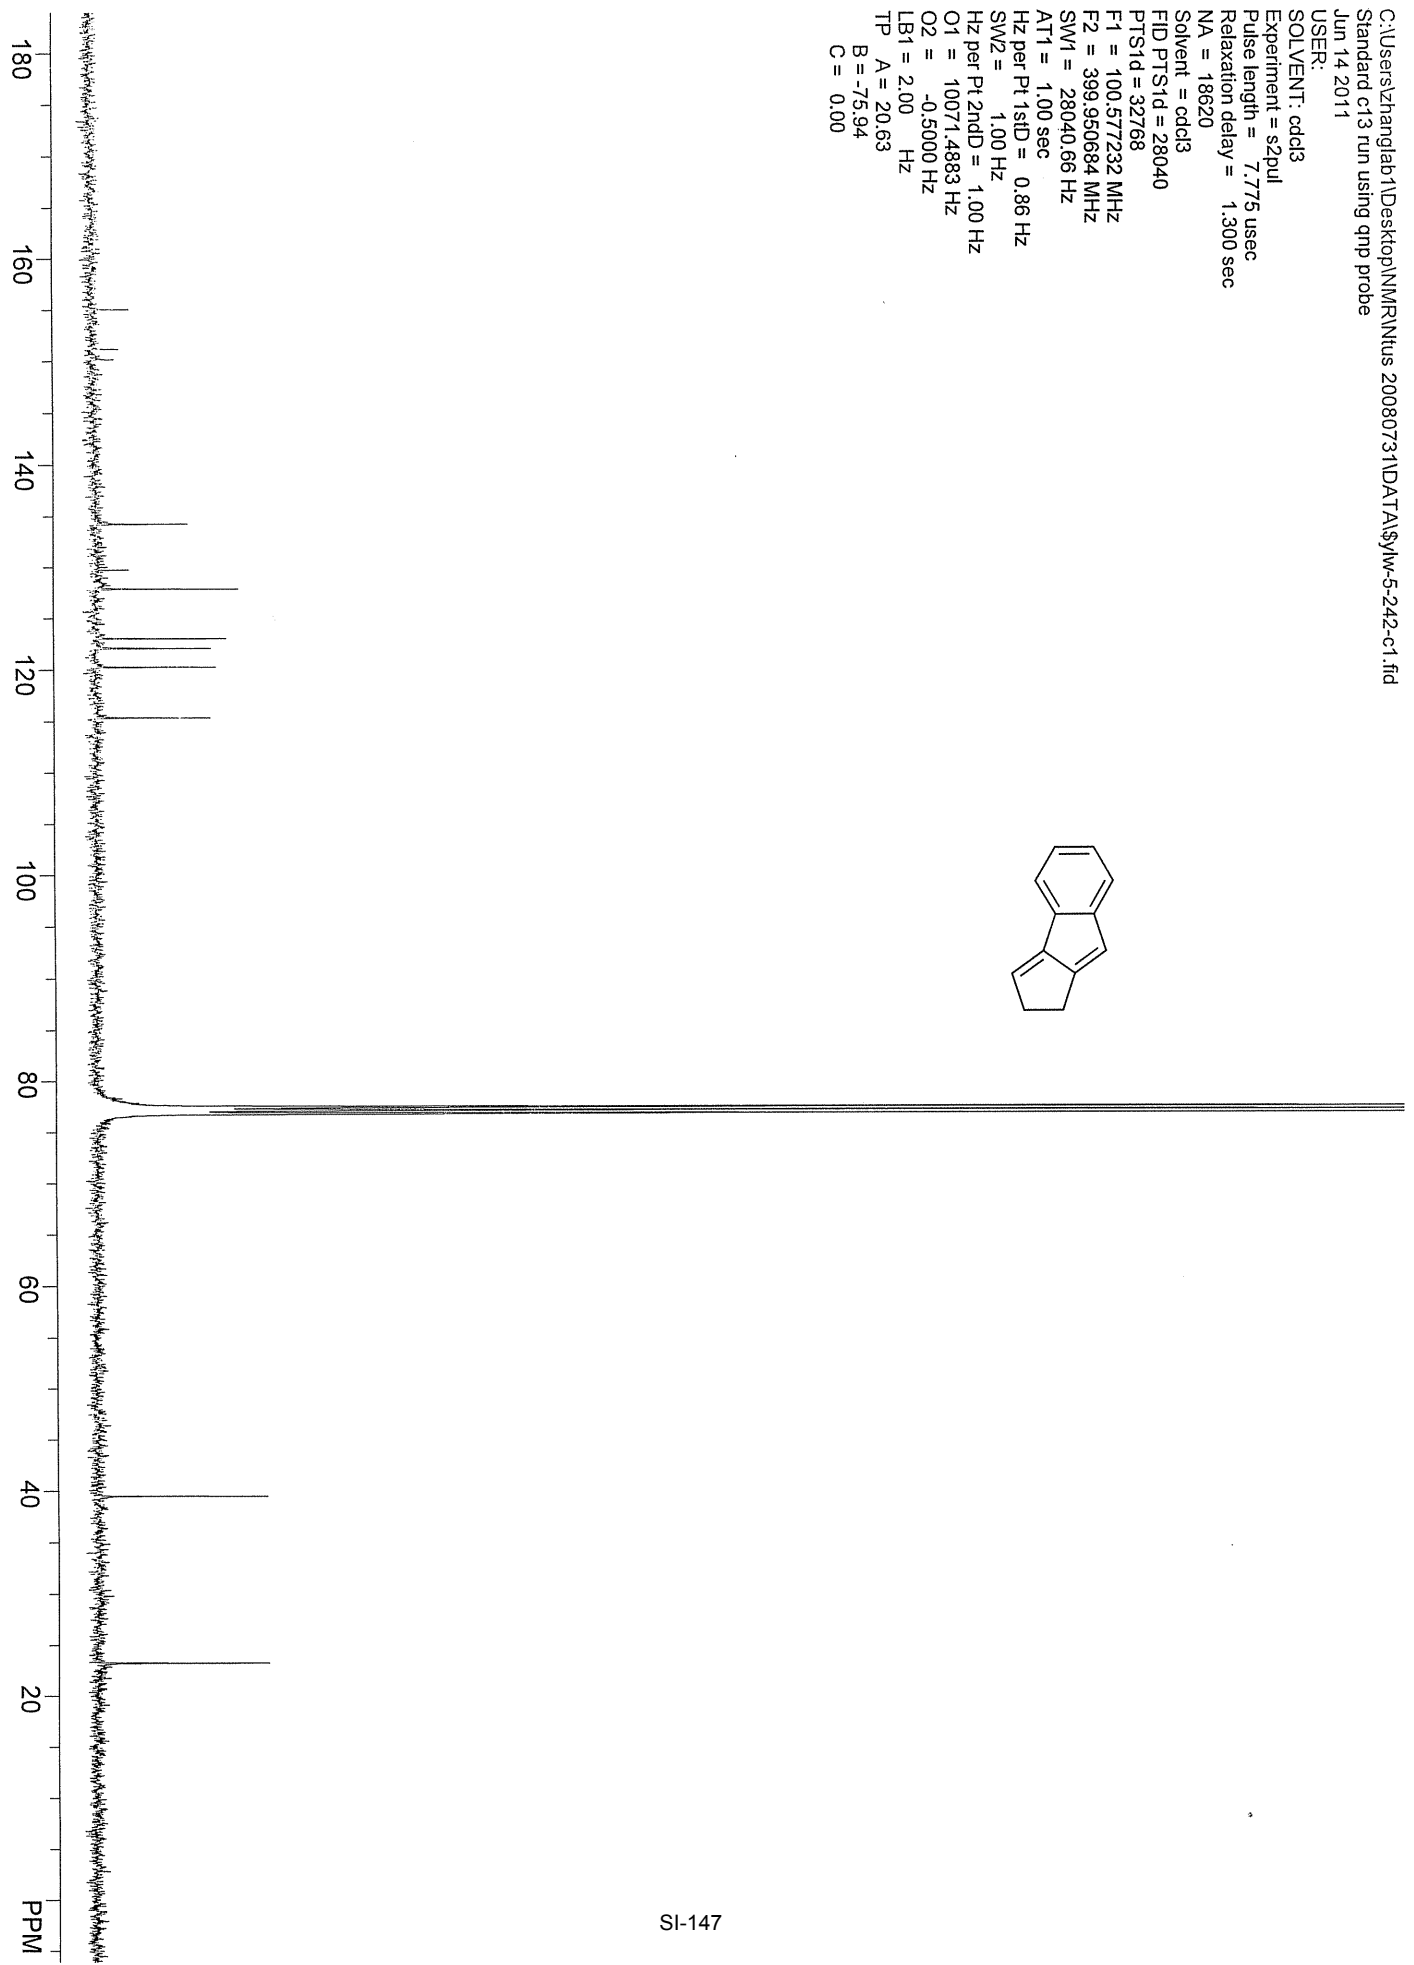

C:\Users\zhanglab1\Desktop\NMR\Ntus 20080731\DATA\%jw-5-241-1.fid  
new experiment  
Jun 15 2011

USER:

SOLVENT: cdcl3

Experiment = s2pul

Pulse length = 11.663 usec

Relaxation delay = 4.800 sec

NA = 16

Solvent = cdcl3

FID PT S1d = 20006

PTS1d = 32768

F1 = 399.950684 MHz

F2 = 100.575279 MHz

SW1 = 8002.40 Hz

AT1 = 2.50 sec

Hz per Pt 1std = 0.24 Hz

SW2 = 1.00 Hz

Hz per Pt 2ndD = 1.00 Hz

O1 = 2006.7504 Hz

O2 = -0.5000 Hz

LB1 = 0.00 Hz

TP A = -52.09

B = -26.55

C = 0.00

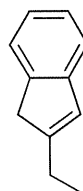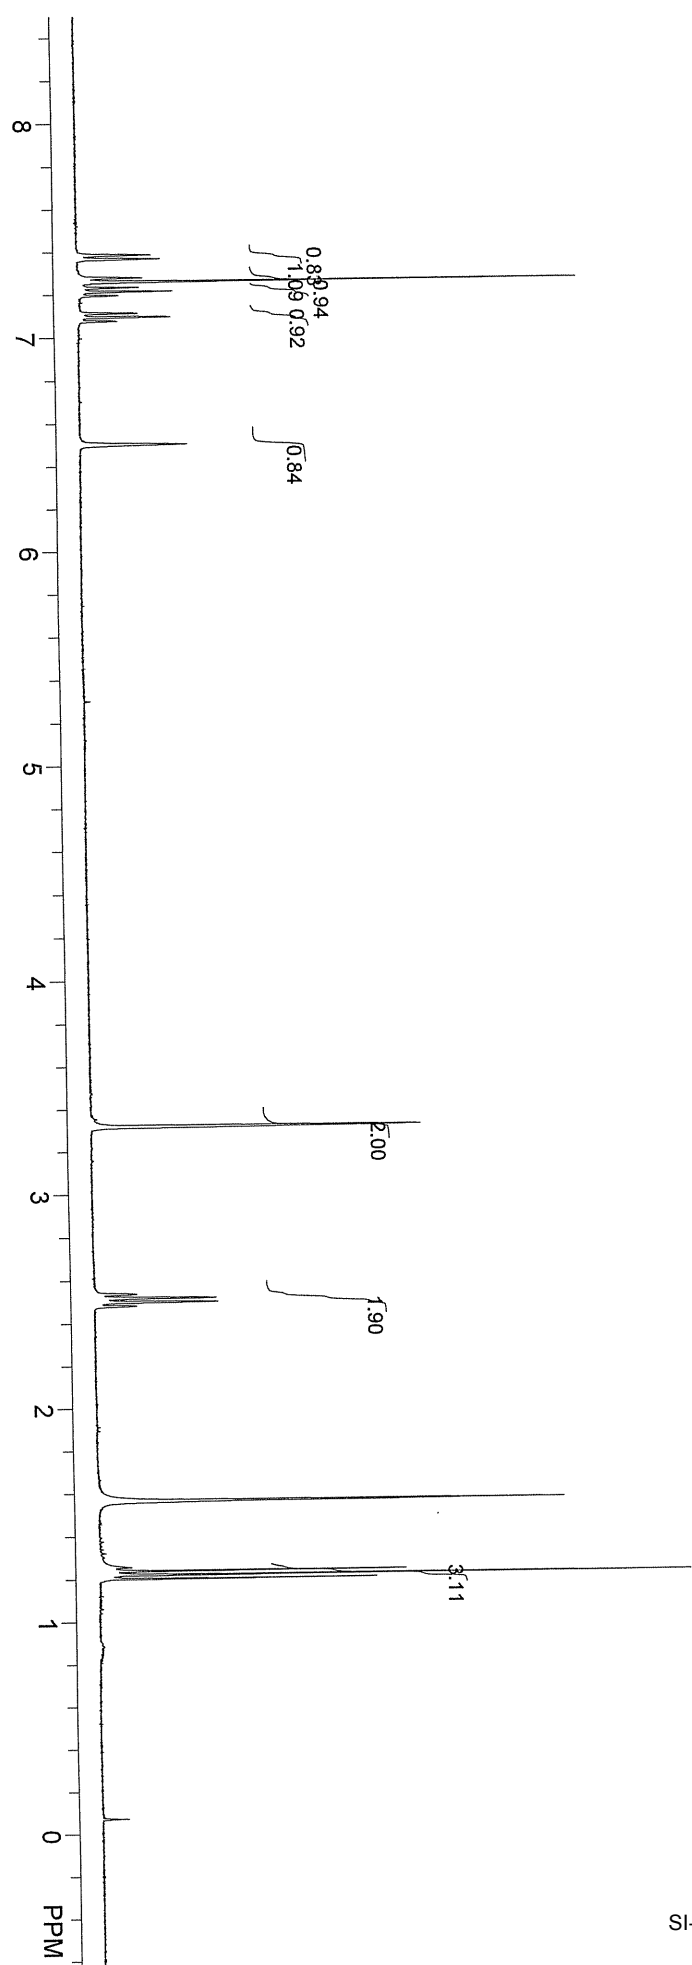

C:\Users\zhanglab1\Desktop\NMR\Ntus 20080731\DATA\yw-5-241-1-HHP-c2.fid  
Standard c13 run using qnp probe  
Jun 15 2011

USER:

SOLVENT: cdd3

Experiment = s2pul

Pulse length = 7.775 usec

Relaxation delay = 1.300 sec

NA = 18864

Solvent = cdd3

FID PTS1d = 28040

PTS1d = 32768

F1 = 100.577232 MHz

F2 = 399.950684 MHz

SWM1 = 28040.66 Hz

AT1 = 1.00 sec

Hz per Pt 1SID = 0.86 Hz

SW2 = 1.00 Hz

Hz per Pt 2ndD = 1.00 Hz

O1 = 10057.2168 Hz

O2 = -0.5000 Hz

LB1 = 2.00 Hz

TP A = -35.82

B = 24.25

C = 0.00

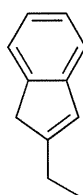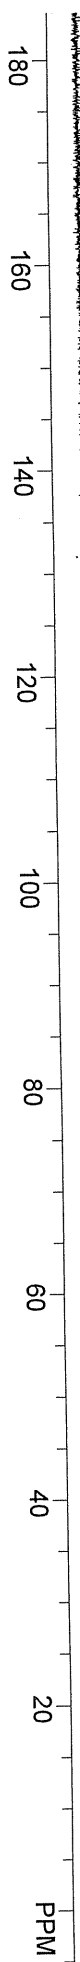

C:\Users\zhanglab1\Desktop\NMR\Nlus 20080731\DATA\syw-5-192-h.fid

May 4 2011

USER:

SOLVENT: cdcl3

Experiment = s2pul

Pulse length = 11.663 usec

Relaxation delay = 4.800 sec

NA = 10

Solvent = cdcl3

FID PTS1d = 20006

PTS1d = 32768

F1 = 399.950684 MHz

F2 = 100.575279 MHz

SW1 = 8002.40 Hz

AT1 = 2.50 sec

Hz per Pt 1SD = 0.24 Hz

SW2 = 1.00 Hz

Hz per Pt 2ndD = 1.00 Hz

O1 = 2006.7504 Hz

O2 = -0.5000 Hz

LB1 = 0.00 Hz

TP A = -42.31

B = -28.55

C = 0.00

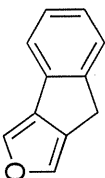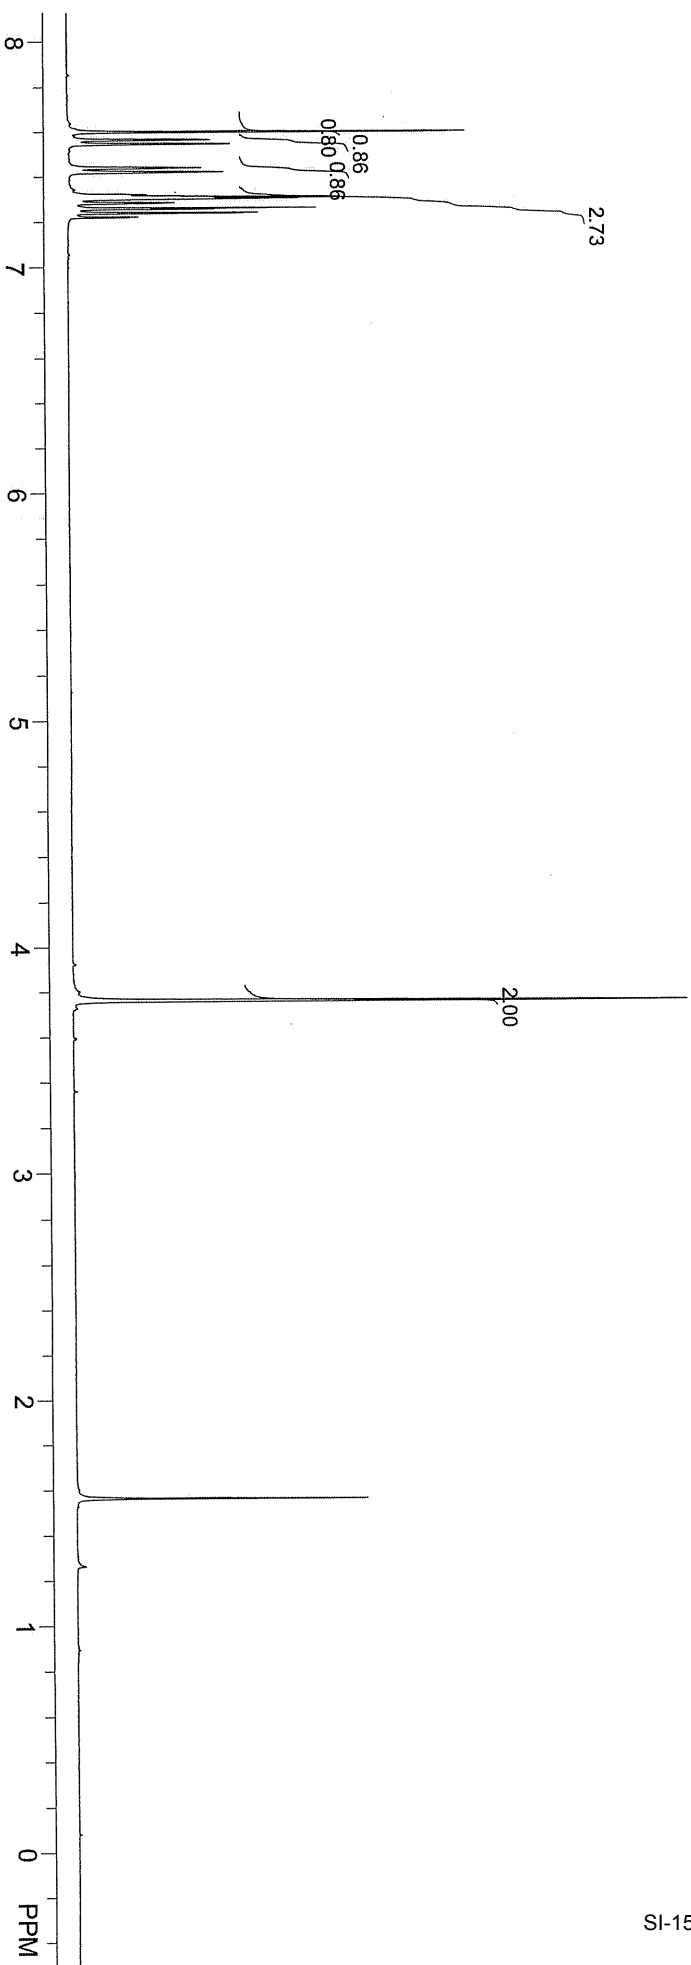

C:\Users\zhanglab1\Desktop\NMR\Ntus 20080731\DATA\5vhw-5-192-c.fid  
Standard c13 run using qnp probe

May 4 2011

USER:

SOLVENT: cdcl3

Experiment = s2pul

Pulse length = 7.775 usec

Relaxation delay = 1.300 sec

NA = 306

Solvent = cdcl3

FID PTS1d = 28040

PTS1d = 32768

F1 = 100.577232 MHz

F2 = 399.950684 MHz

SW1 = 28040.66 Hz

AT1 = 1.00 sec

Hz per Pt 1SID = 0.86 Hz

SW2 = 1.00 Hz

Hz per Pt 2nnd = 1.00 Hz

O1 = 10056.3604 Hz

O2 = -0.5000 Hz

LB1 = 2.00 Hz

TP A = -12.19

B = -25.31

C = 0.00

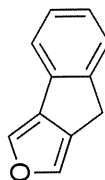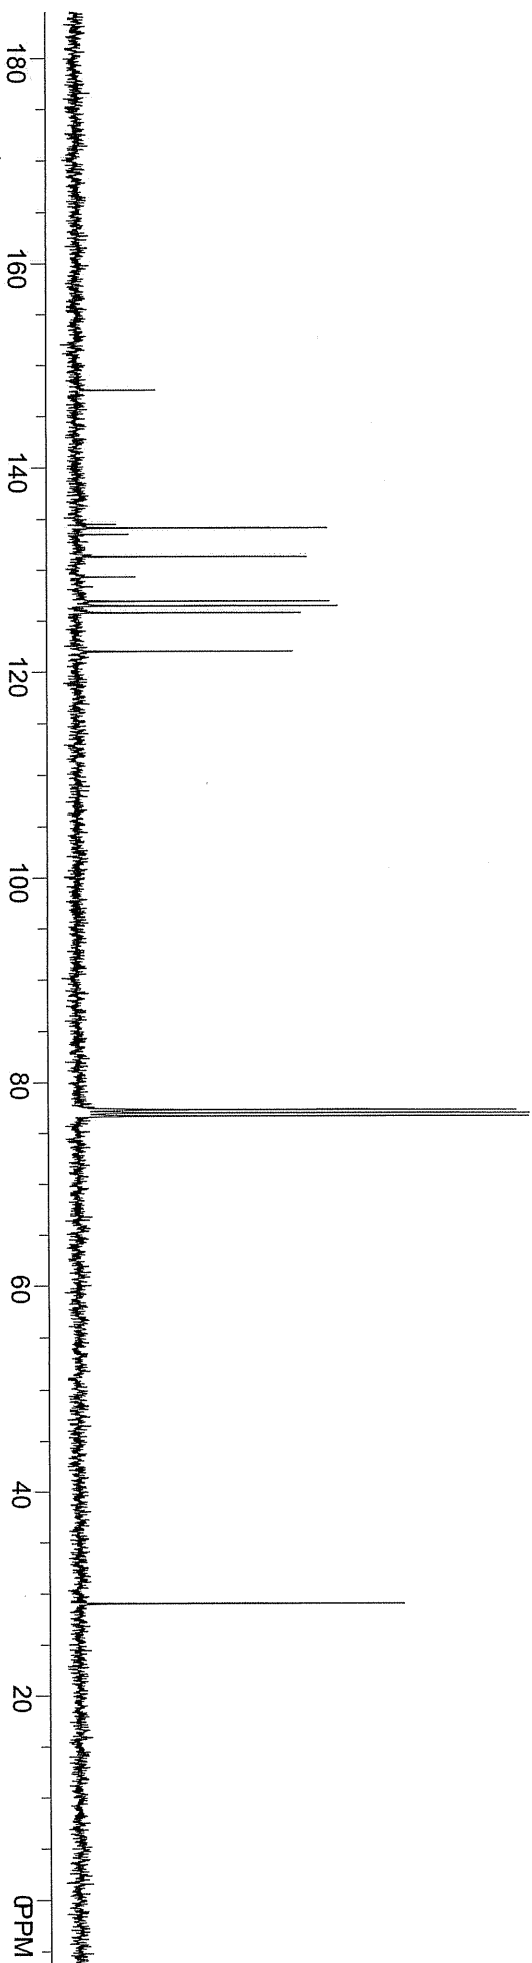

C:\Users\zhanglab1\Desktop\NMR\Ntus 20080731\DATA\5-202-1.fid  
STANDARD PROTON PARAMETERS  
May 11 2011  
USER:

SOLVENT: cdc13  
Experiment = s2pul  
Pulse length = 7.700 usec  
Relaxation delay = 4.800 sec  
NA = 8

Solvent = cdc13  
FID PTS1d = 20006  
PTS1d = 32768  
F1 = 499.858521 MHz  
F2 = 125.700813 MHz  
SW1 = 8002.40 Hz  
AT1 = 2.50 sec  
Hz per Pt 1SID = 0.24 Hz  
SW2 = 1.00 Hz  
Hz per Pt 2nDD = 1.00 Hz  
O1 = 2474.4551 Hz  
O2 = -0.5000 Hz  
LB1 = 0.00 Hz  
TP A = 49.11  
B = 8.65  
C = 0.00

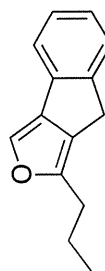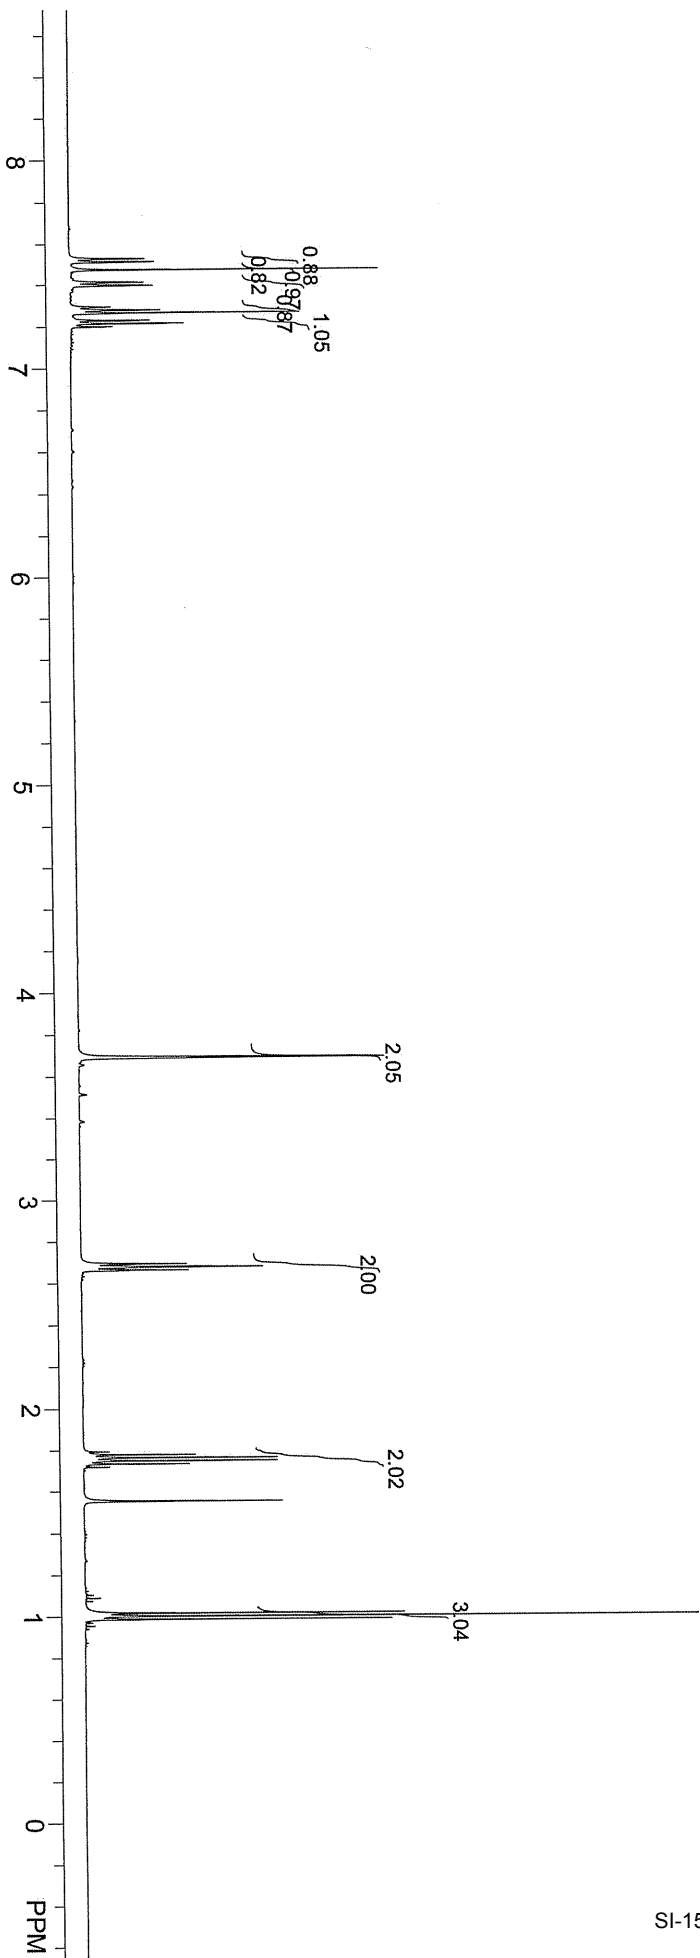



C:\Users\zhanglab1\Desktop\NMR\Initus 20080731\DATA\5jw-5-202-c1.fid  
Standard c13 run using qnp probe  
May 11 2011

USER:  
SOLVENT: cdcl3  
Experiment = s2pul  
Pulse length = 7.775 usec  
Relaxation delay = 1.300 sec  
NA = 146  
Solvent = cdcl3  
FID PTS1d = 28040  
PTS1d = 32768  
F1 = 100.577232 MHz  
F2 = 399.950684 MHz  
SW1 = 28040.66 Hz  
AT1 = 1.00 sec  
Hz per Pt 1stD = 0.86 Hz  
SW2 = 1.00 Hz  
Hz per Pt 2ndD = 1.00 Hz  
O1 = 10053.7930 Hz  
O2 = -0.5000 Hz  
LB1 = 2.00 Hz  
TP A = -27.66  
B = -1.41  
C = 0.00

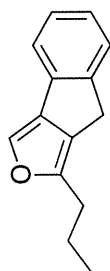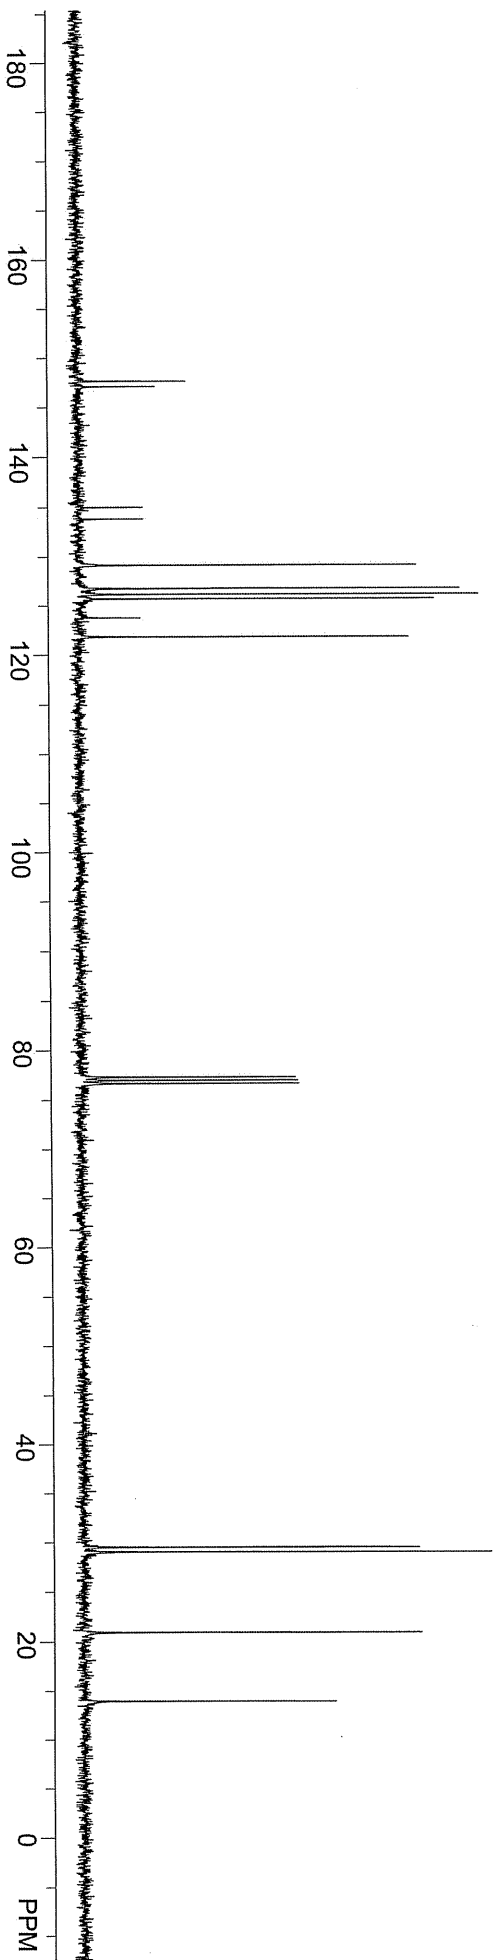

C:\Users\zhanglab1\Desktop\NMR\Nitus 20080731\DATA\5\iw-5-203-NTs-p.fid

May 12 2011

USER:

SOLVENT: cdcl3

Experiment = s2pul

Pulse length = 7.700 usec

Relaxation delay = 4.800 sec

NA = 8

Solvent = cdcl3

FID PTS'id = 20006

PTS'id = 32768

F1 = 499.858521 MHz

F2 = 125.700813 MHz

SW1 = 8002.40 Hz

AT1 = 2.50 sec

Hz per Pt 1stD = 0.24 Hz

SW2 = 1.00 Hz

Hz per Pt 2ndD = 1.00 Hz

O1 = 2474.4551 Hz

O2 = -0.5000 Hz

LB1 = 0.00 Hz

TP A = 32.08

B = 6.59

C = 0.00

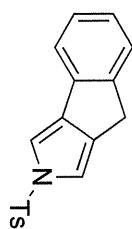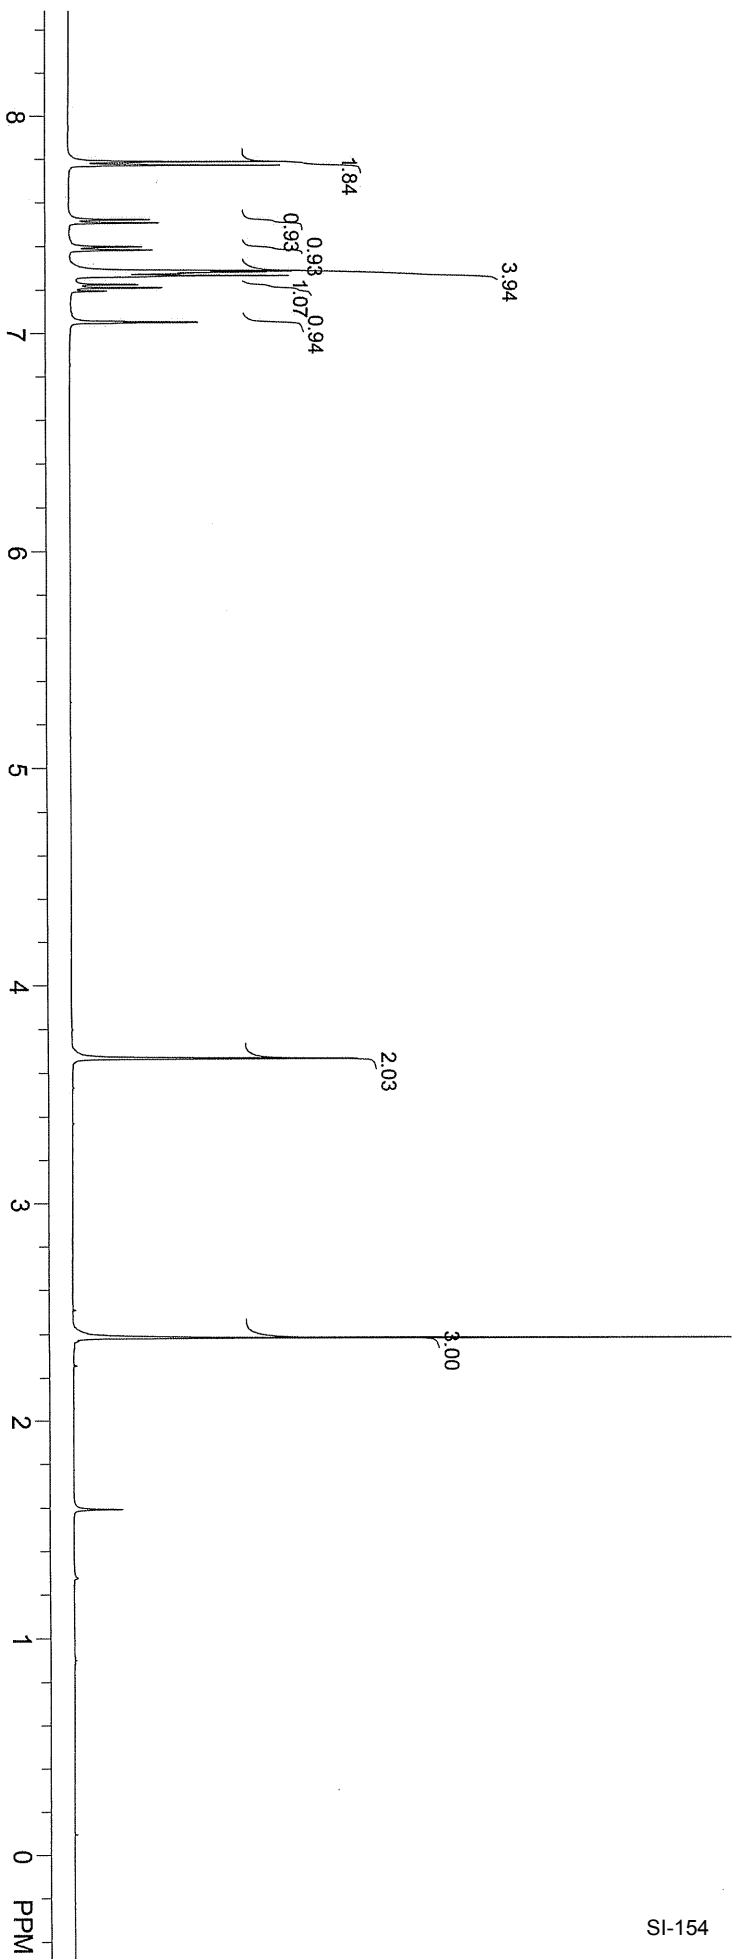

C:\Users\zhanglab1\Desktop\NMR\Ntus 20080731\DATA\yw-5-203-NTs-p-c1.fid  
STANDARD CARBON PARAMETERS  
May 12 2011

USER:

SOLVENT: cdcl3

Experiment = s2pul

Pulse length = 6.000 usec

Relaxation delay = 3.000 sec

NA = 108

Solvent = cdcl3

FID PTS1d = 36749

PTS1d = 65536

F1 = 125.701683 MHz

F2 = 499.858551 MHz

SW1 = 28258.57 Hz

AT1 = 1.30 sec

Hz per Pt 1stD = 0.43 Hz

SW2 = 1.00 Hz

Hz per Pt 2ndD = 1.00 Hz

O1 = 12767.7959 Hz

O2 = -0.5000 Hz

LB1 = 2.00 Hz

TP A = -231.56

B = 142.03

C = 0.00

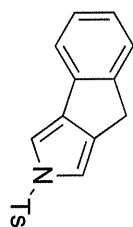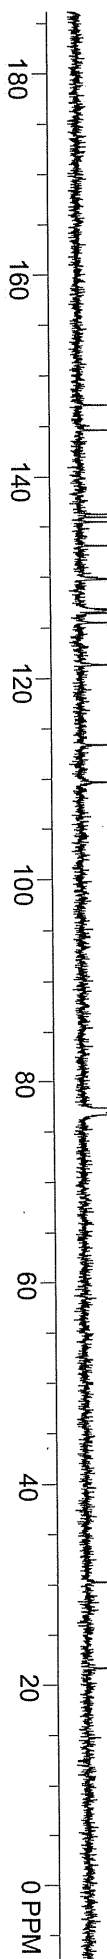

C:\Users\zhanglab1\Desktop\NMR\Ntus 20080731\DATA\yw-5-193-D.fid  
new experiment  
May 5 2011

USER:

SOLVENT: cdcl3  
Experiment = s2pul  
Pulse length = 11.663 usec  
Relaxation delay = 4.800 sec  
NA = 16

Solvent = cdcl3  
FID PTS1d = 20006  
PTS1d = 32768  
F1 = 399.950684 MHz  
F2 = 1.000000 MHz  
SW1 = 8002.40 Hz  
AT1 = 2.50 sec  
Hz per Pt 1stD = 0.24 Hz  
SW2 = 1.00 Hz  
Hz per Pt 2ndD = 1.00 Hz  
O1 = 2006.7504 Hz  
O2 = -0.5000 Hz  
LB1 = 0.00 Hz  
TP A = -49.34  
B = -24.14  
C = 0.00

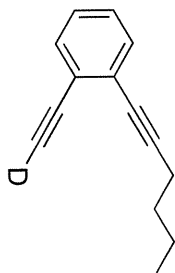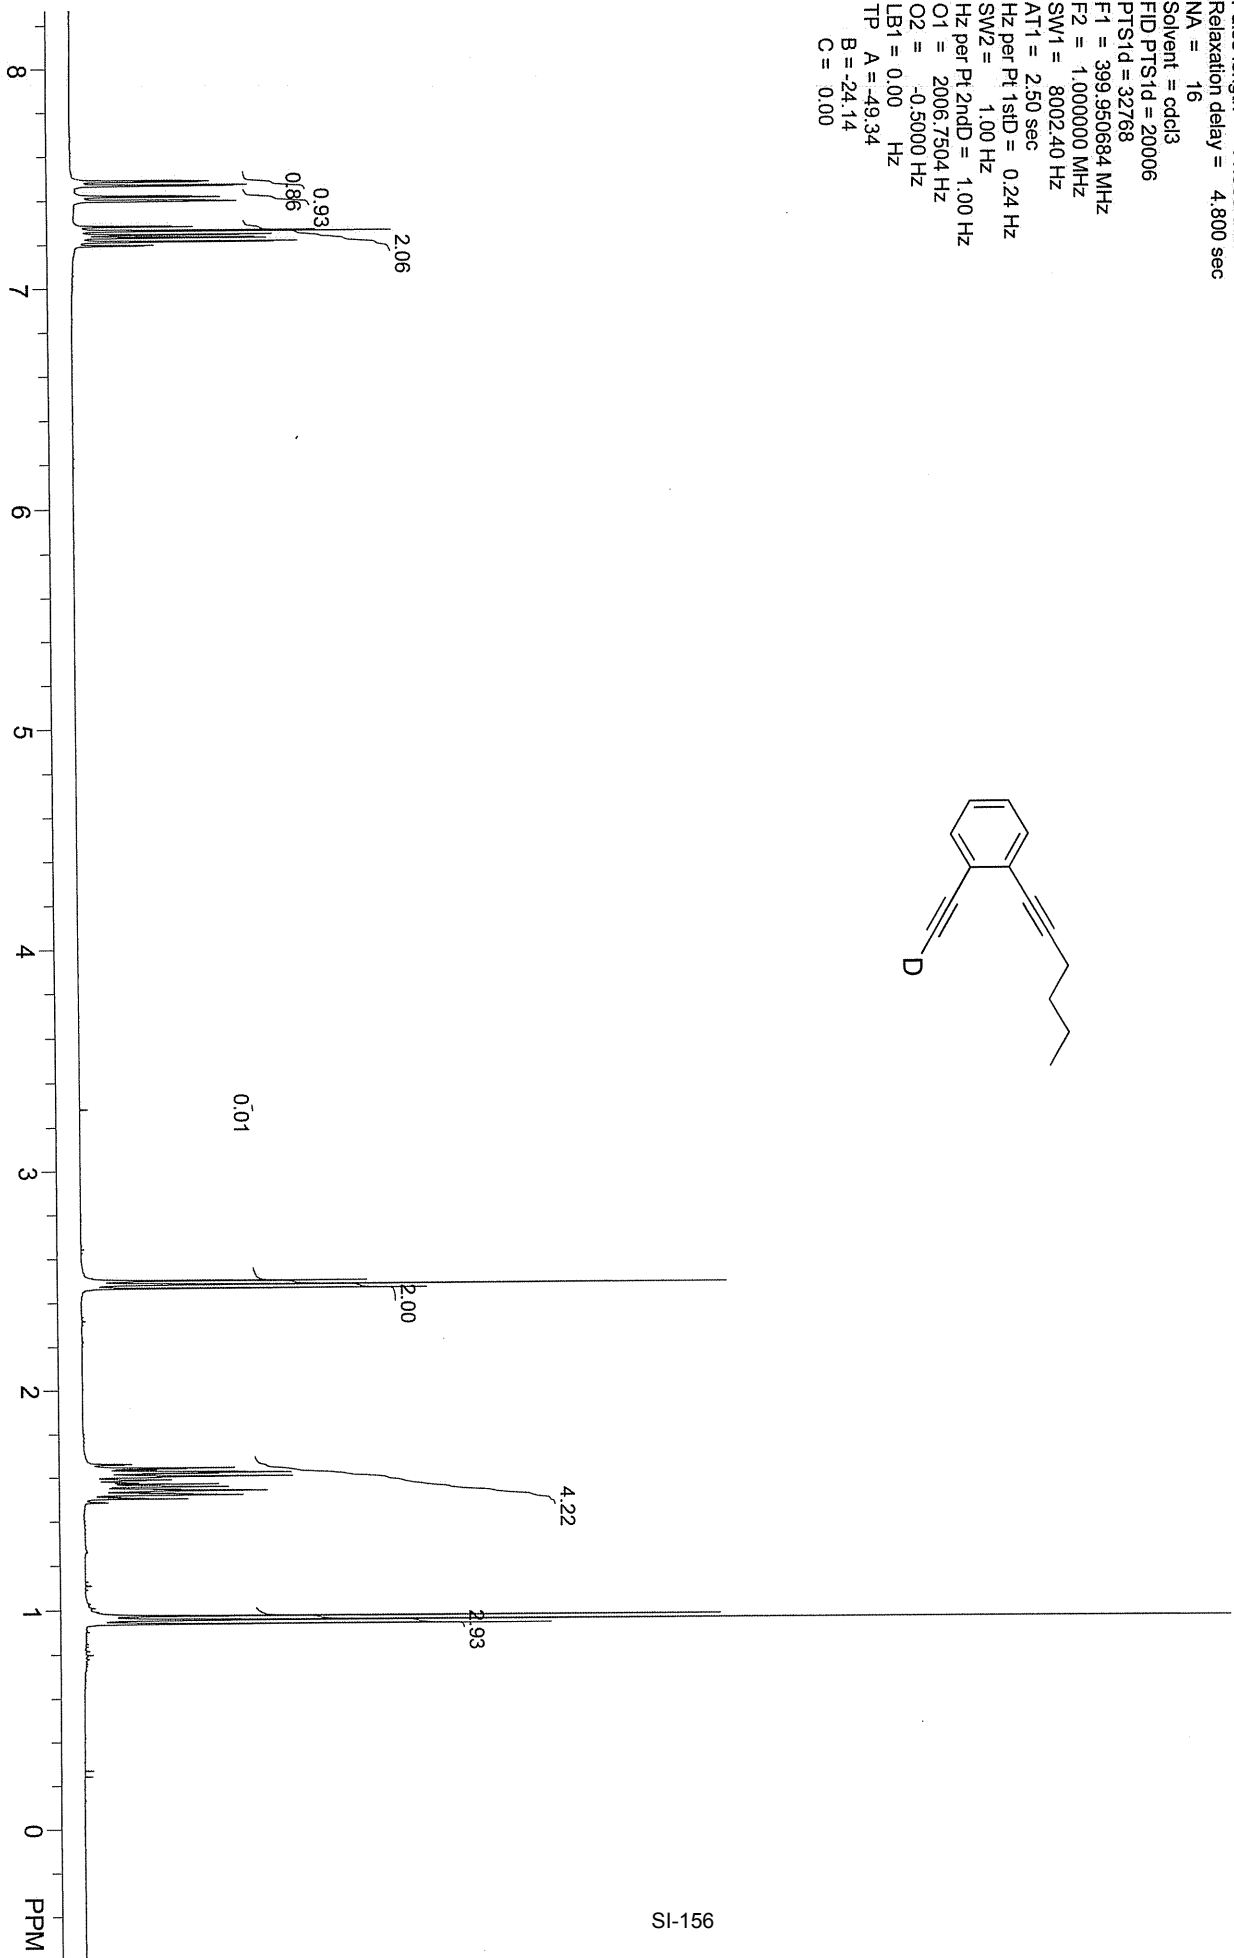

C:\Users\zhanglab1\Desktop\NMR\Ninus 20080731\DATA\5-193-D-c-500.fid  
STANDARD CARBON PARAMETERS

May 5 2011

USER:

SOLVENT: cdcl3

Experiment = s2pul

Pulse length = 6.000 usec

Relaxation delay = 3.000 sec

NA = 1710

Solvent = cdcl3

FID PTS:td = 36749

PTS:td = 65536

F1 = 125.701683 MHz

F2 = 499.858551 MHz

SW1 = 28258.57 Hz

AT1 = 1.30 sec

Hz per Pt 1std = 0.43 Hz

SW2 = 1.00 Hz

Hz per Pt 2ndD = 1.00 Hz

O1 = 12777.2490 Hz

O2 = -0.5000 Hz

LB1 = 2.00 Hz

TP A = -255.47

B = 158.91

C = 0.00

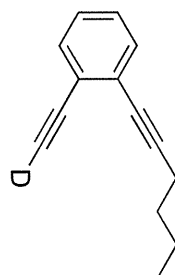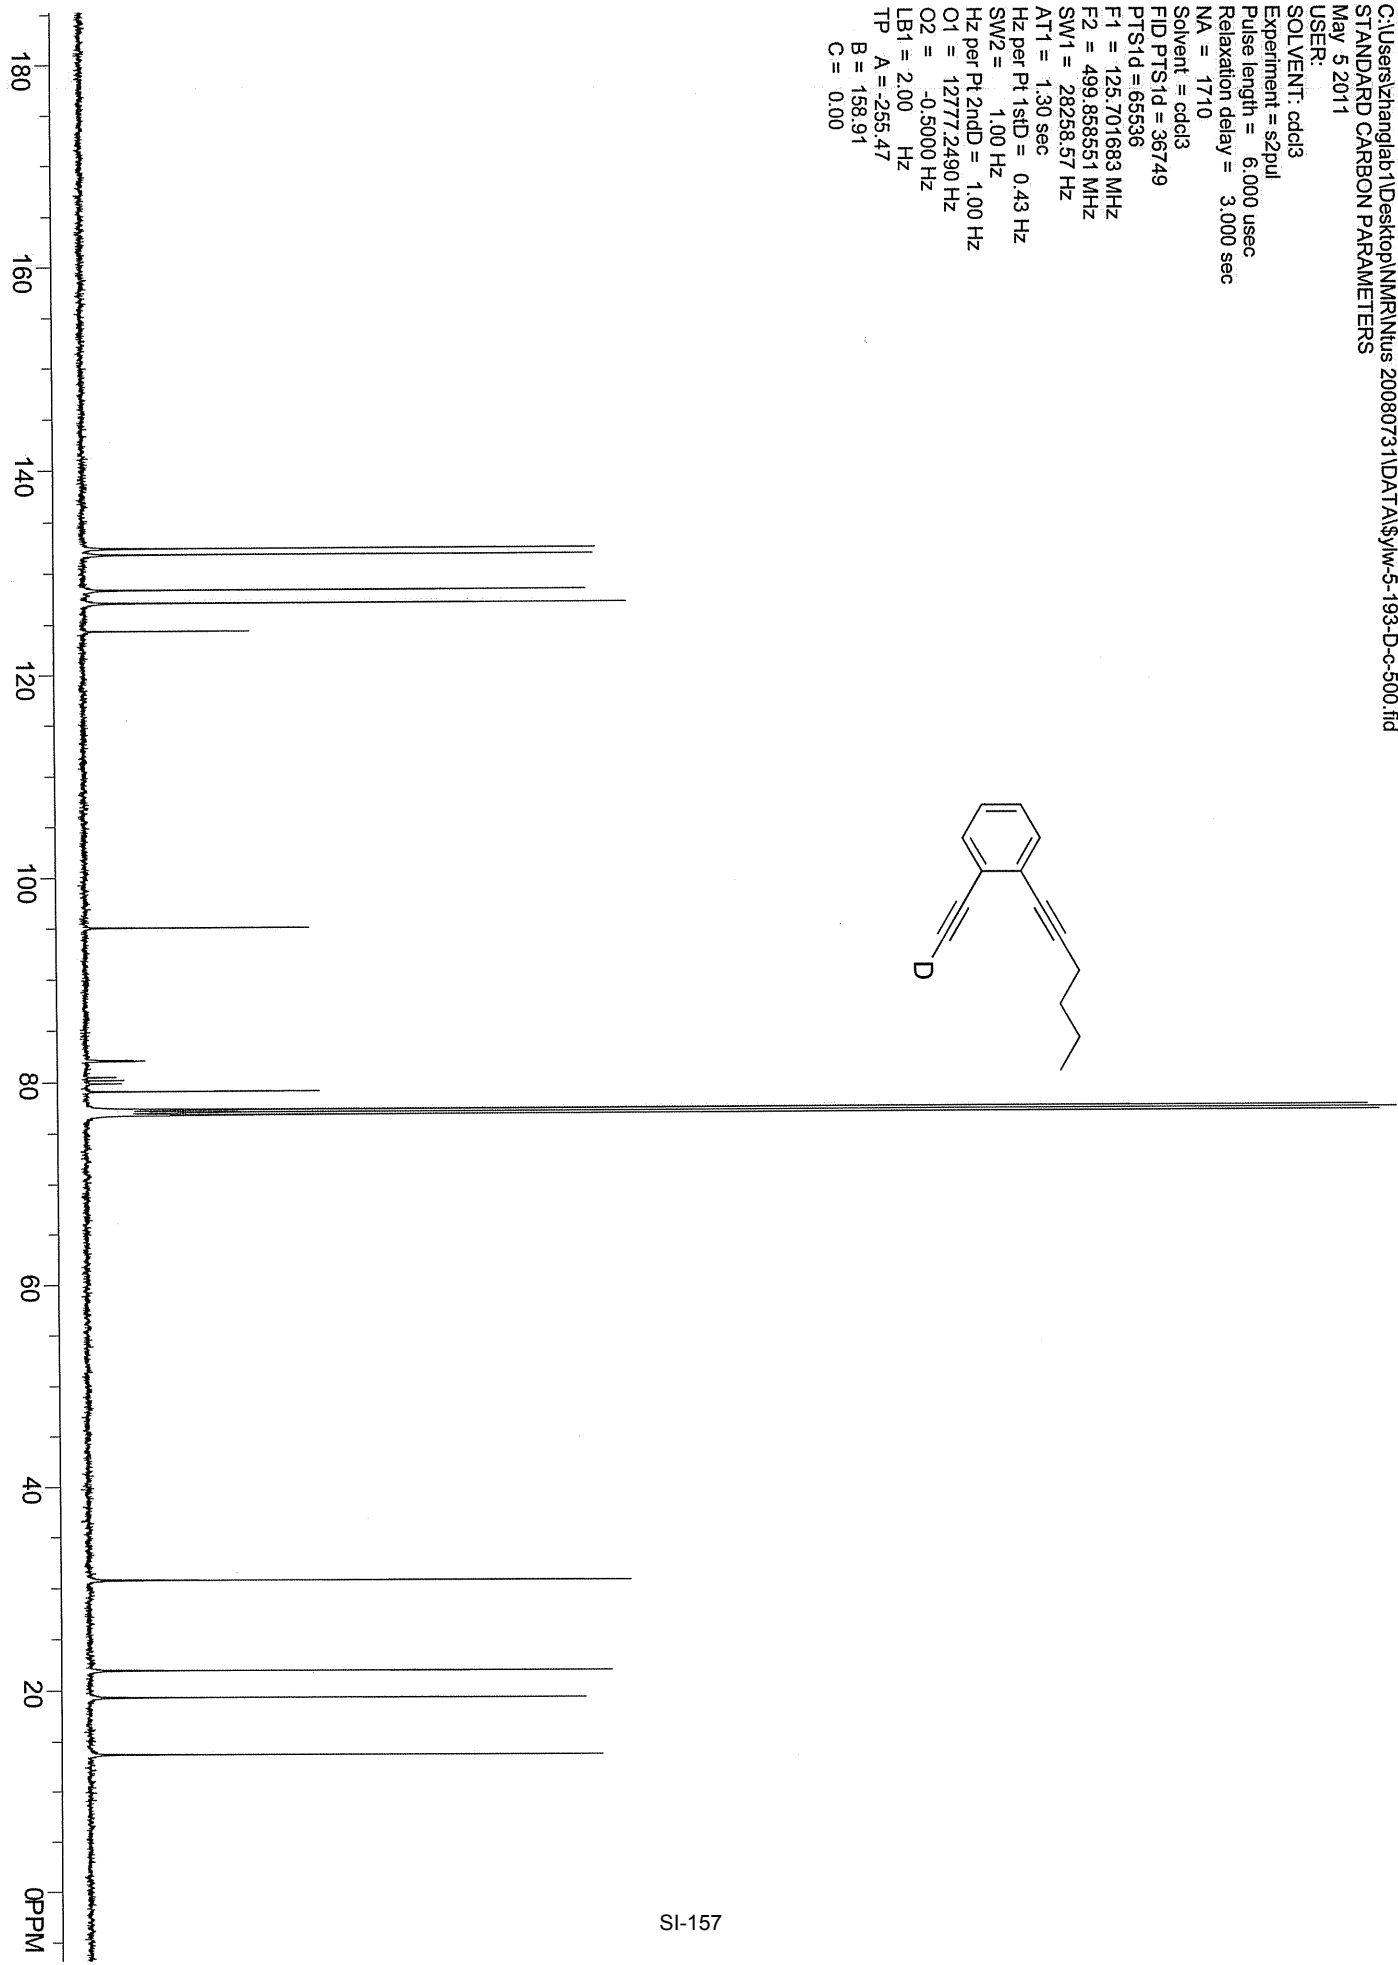

C:\Users\zhanglab1\Desktop\NMR\Ntus 20080731\DATA\5yw-5-194-D2O-2.fid  
new experiment  
May 8 2011

USER:

SOLVENT: cdcl3

Experiment = s2pul

Pulse length = 11.663 usec

Relaxation delay = 4.800 sec

NA = 16

Solvent = cdcl3

FID.PTS1d = 20006

PTS1d = 32768

F1 = 399.950684 MHz

F2 = 100.575279 MHz

SW1 = 8002.40 Hz

AT1 = 2.50 sec

Hz per Pt 1stD = 0.24 Hz

SW2 = 1.00 Hz

Hz per Pt 2ndD = 1.00 Hz

O1 = 2006.7504 Hz

O2 = -0.5000 Hz

LB1 = 0.00 Hz

TP A = -46.40

B = -31.34

C = 0.00

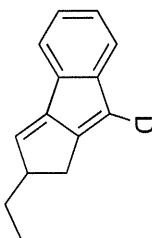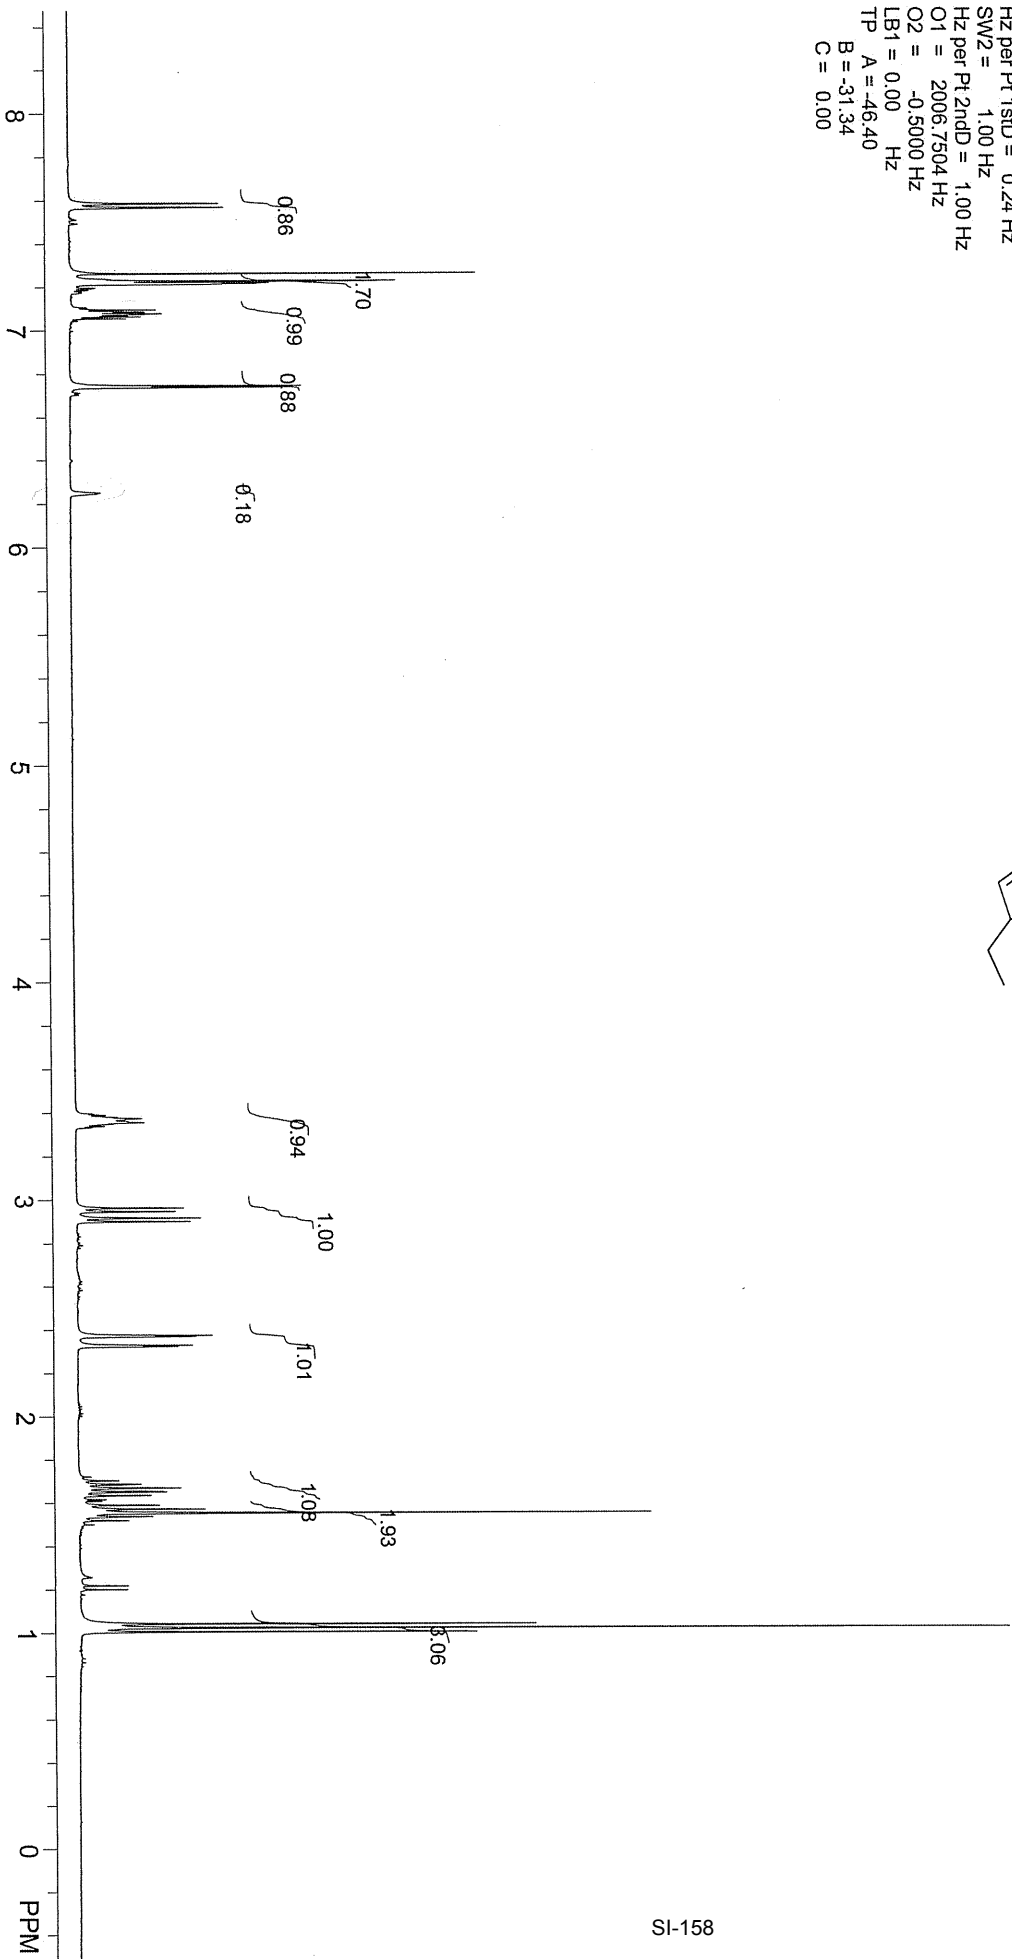

C:\Users\zhanglab1\Desktop\NMR\Ntus 20080731\DATA\5jw-5-194-D2O-c1.fid  
Standard c13 run using qnp probe

May 9 2011

USER:

SOLVENT: cdcl3

Experiment = s2pul

Pulse length = 7.775 usec

Relaxation delay = 1.300 sec

NA = 2144

Solvent = cdcl3

FID PTS1d = 28040

PTS1d = 32768

F1 = 100.577232 MHz

F2 = 399.950684 MHz

SW1 = 28040.66 Hz

AT1 = 1.00 sec

Hz per Pt 1sID = 0.86 Hz

SW2 = 1.00 Hz

Hz per Pt 2ndD = 1.00 Hz

O1 = 10056.3613 Hz

O2 = -0.5000 Hz

LB1 = 2.00 Hz

TP A = -18.75

B = -12.66

C = 0.00

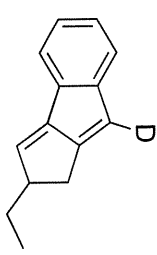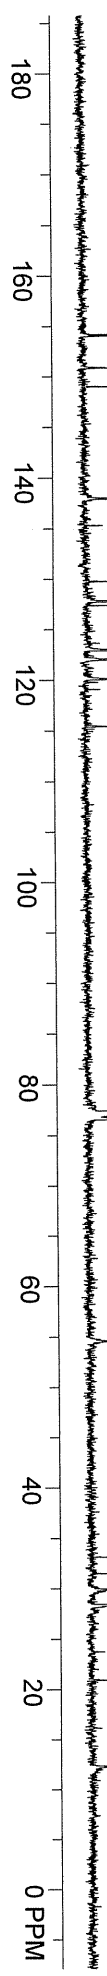

| Parameter                | Value                                                                    |
|--------------------------|--------------------------------------------------------------------------|
| 1 Data File Name         | C:/Users/zhang laptop/Desktop/NMR/Yanzhao Wang/wyz4-288-pro-c13.fid/ fid |
| 2 Title                  | wyz4-288-pro-c13                                                         |
| 3 Solvent                | cdcl3                                                                    |
| 4 Acquisition Date       | 2011-09-28T18:38:26                                                      |
| 5 Spectrometer Frequency | 150.79                                                                   |

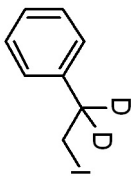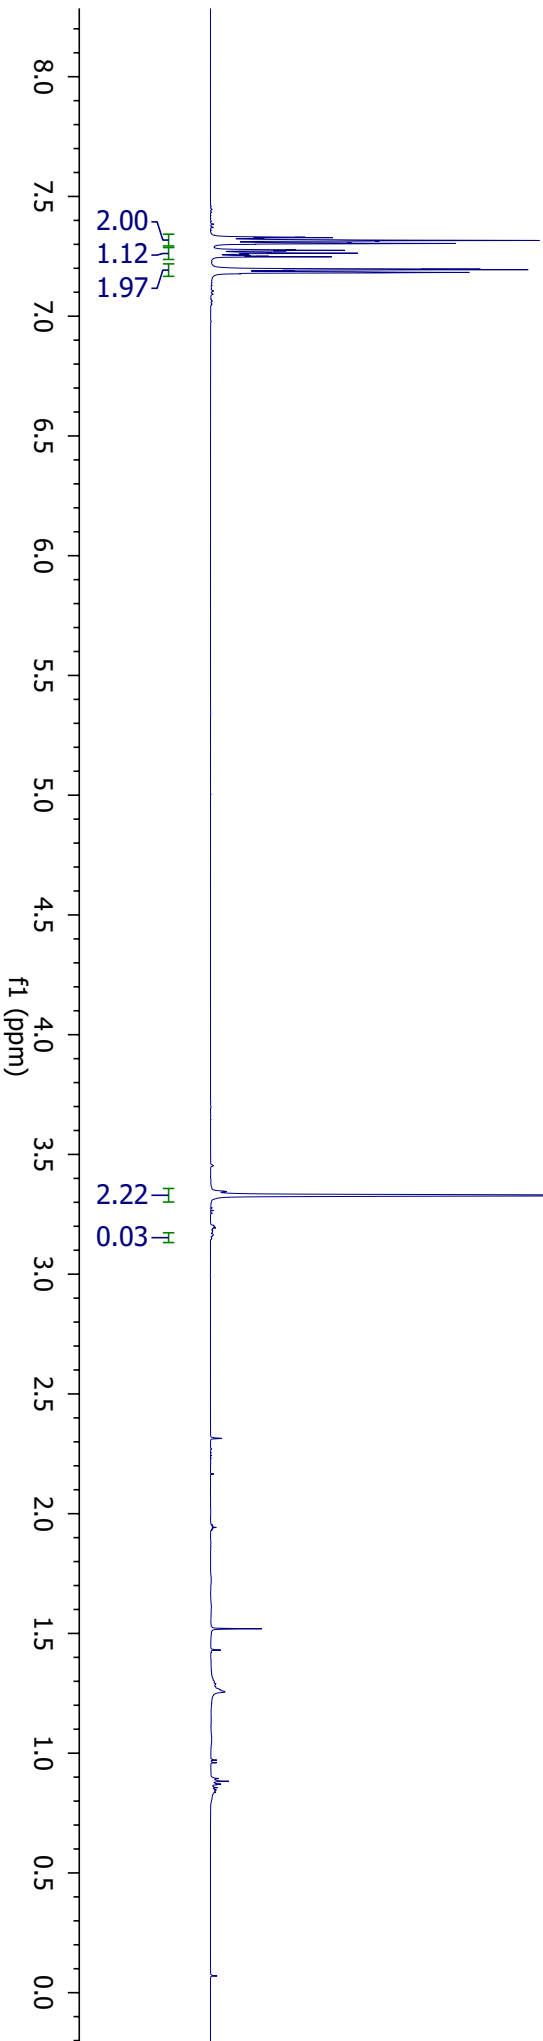



128.62  
128.28  
126.84

77.21  
77.00  
76.79

5.33

| Parameter                | Value                                                                    |
|--------------------------|--------------------------------------------------------------------------|
| 1 Data File Name         | C:/Users/zhang laptop/Desktop/NMR/Yanzhao Wang/wyz4-288-pro-cl3.fid/ fid |
| 2 Title                  | wyz4-288-pro-cl3                                                         |
| 3 Solvent                | cdcl3                                                                    |
| 4 Acquisition Date       | 2011-09-28T18:38:26                                                      |
| 5 Spectrometer Frequency | 150.79                                                                   |

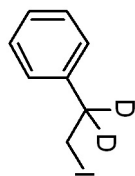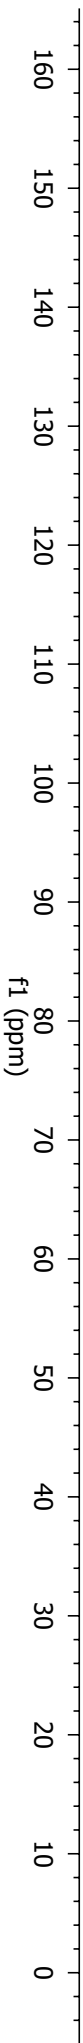

| Parameter                | Value                                                                   |
|--------------------------|-------------------------------------------------------------------------|
| 1 Data File Name         | C:/Users/zhang laptop/Desktop/NMR/Yanzhao Wang/wyz4-290-por-h1.fid/ fid |
| 2 Title                  | wyz4-290-por-h1                                                         |
| 3 Solvent                | CDCl3                                                                   |
| 4 Acquisition Date       | 2011-09-22T23:10:53                                                     |
| 5 Spectrometer Frequency | 499.86                                                                  |

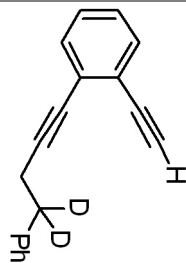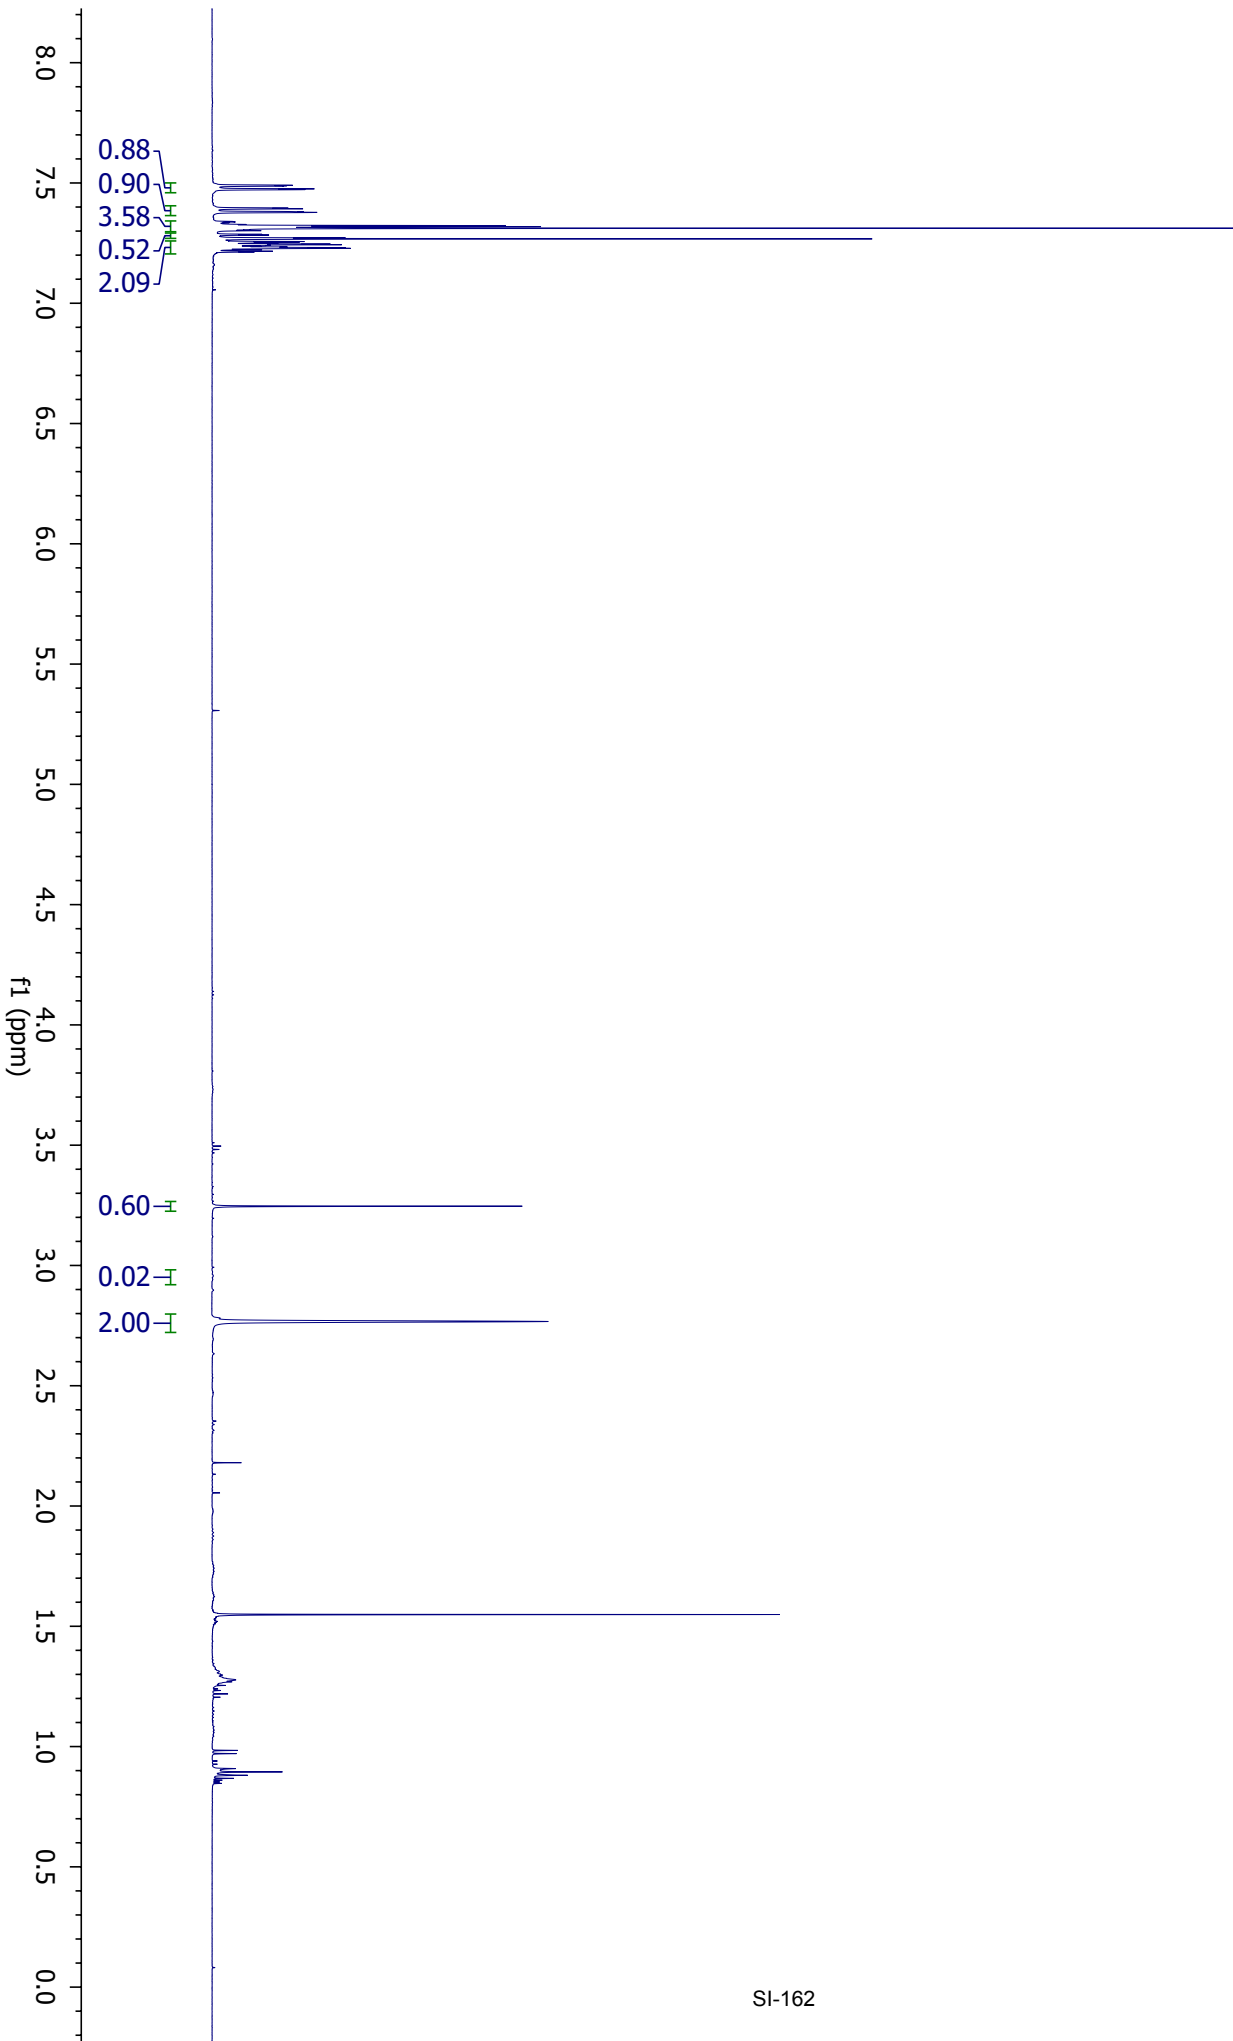

140.58  
132.48  
131.96  
128.55  
128.41  
128.37  
127.29  
126.85  
126.27  
124.32

94.03

82.35  
80.54  
79.67  
77.26  
77.00  
76.75

21.64

| Parameter                | Value                                                                        |
|--------------------------|------------------------------------------------------------------------------|
| 1 Data File Name         | C:/Users/zhang laptop/Desktop/NMR/Yanzhao Wang/wyz4-290-pro-c13-121.fid/ fid |
| 2 Title                  | wyz4-290-pro-c13-121                                                         |
| 3 Solvent                | CDCl3                                                                        |
| 4 Acquisition Date       | 2011-09-22T23:13:57                                                          |
| 5 Spectrometer Frequency | 125.70                                                                       |

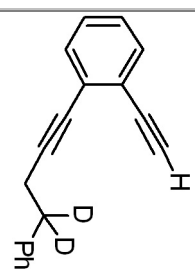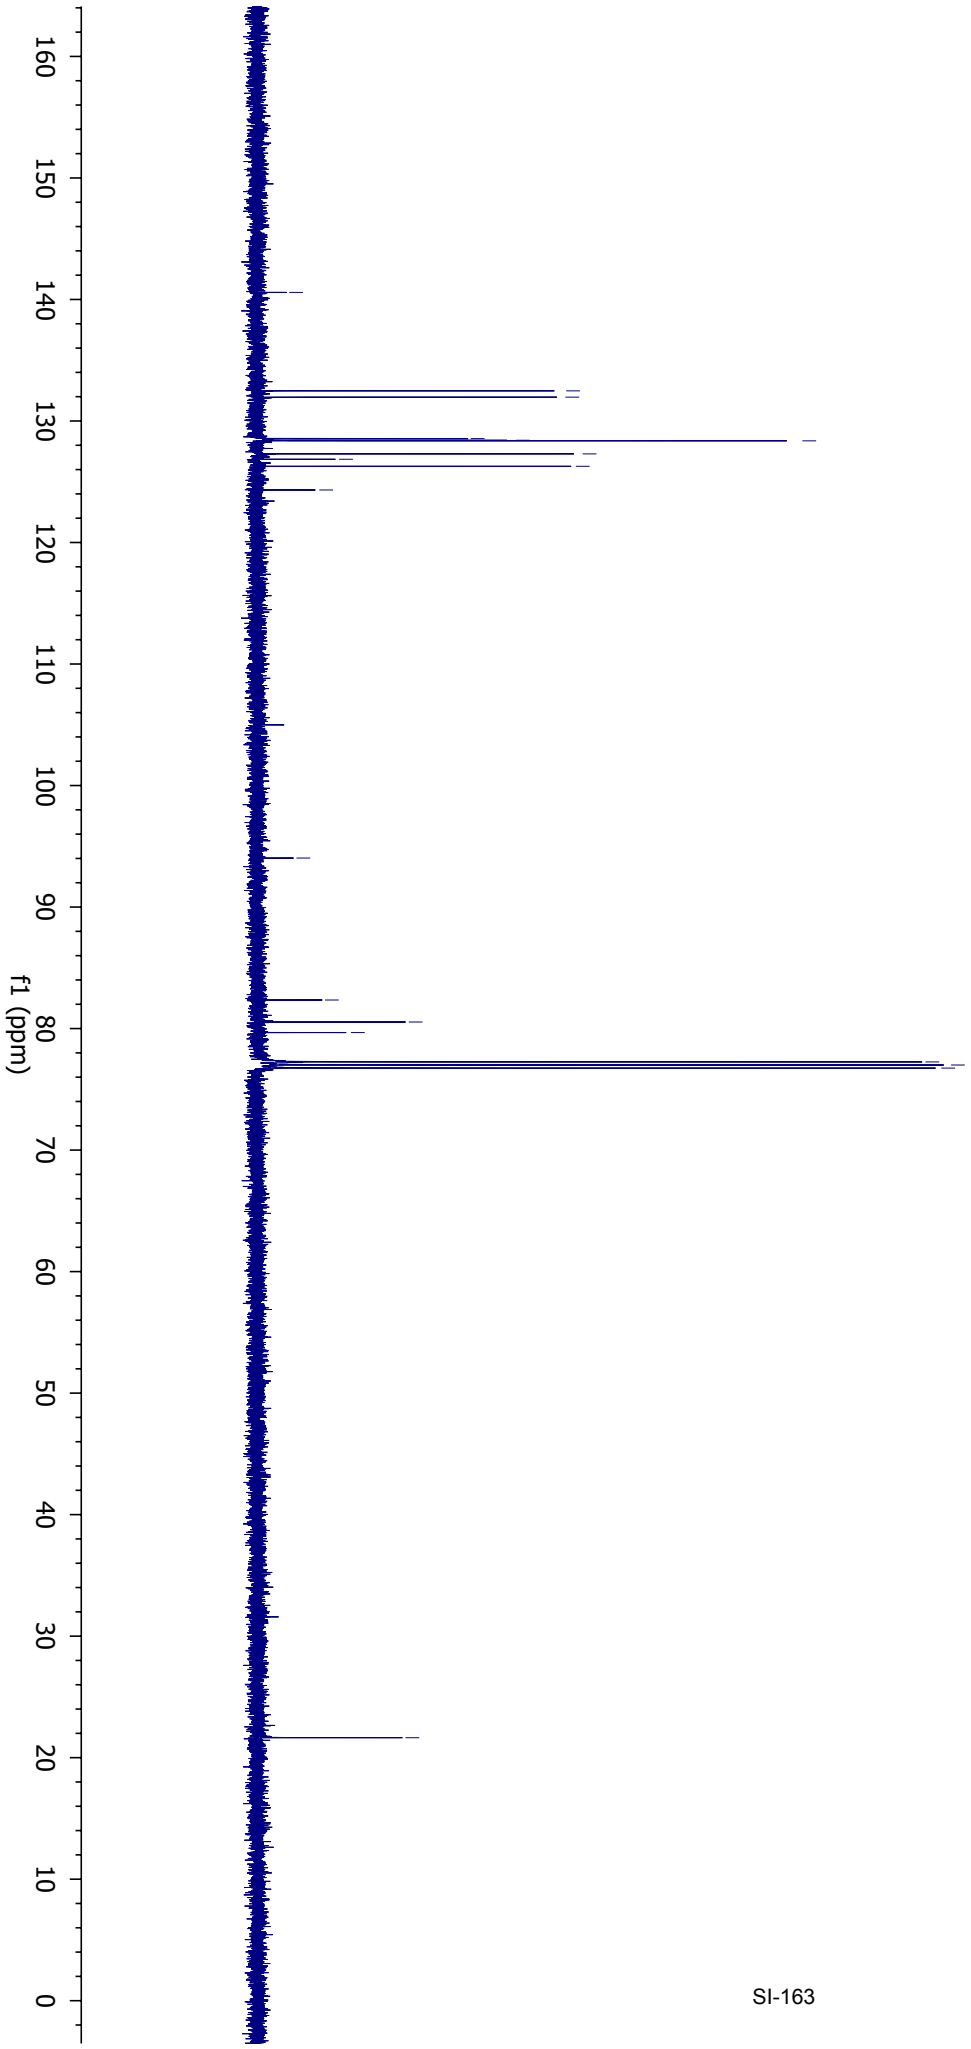

| Parameter                | Value                                                                   |
|--------------------------|-------------------------------------------------------------------------|
| 1 Data File Name         | C:/Users/zhang laptop/Desktop/NMR/Yanzhao Wang/wyz4-292-pro-h1.fid/ fid |
| 2 Title                  | wyz4-292-pro-h1                                                         |
| 3 Solvent                | CDCl3                                                                   |
| 4 Acquisition Date       | 2011-09-22T22:47:00                                                     |
| 5 Spectrometer Frequency | 499.86                                                                  |

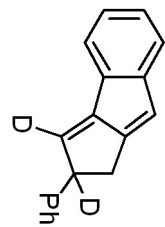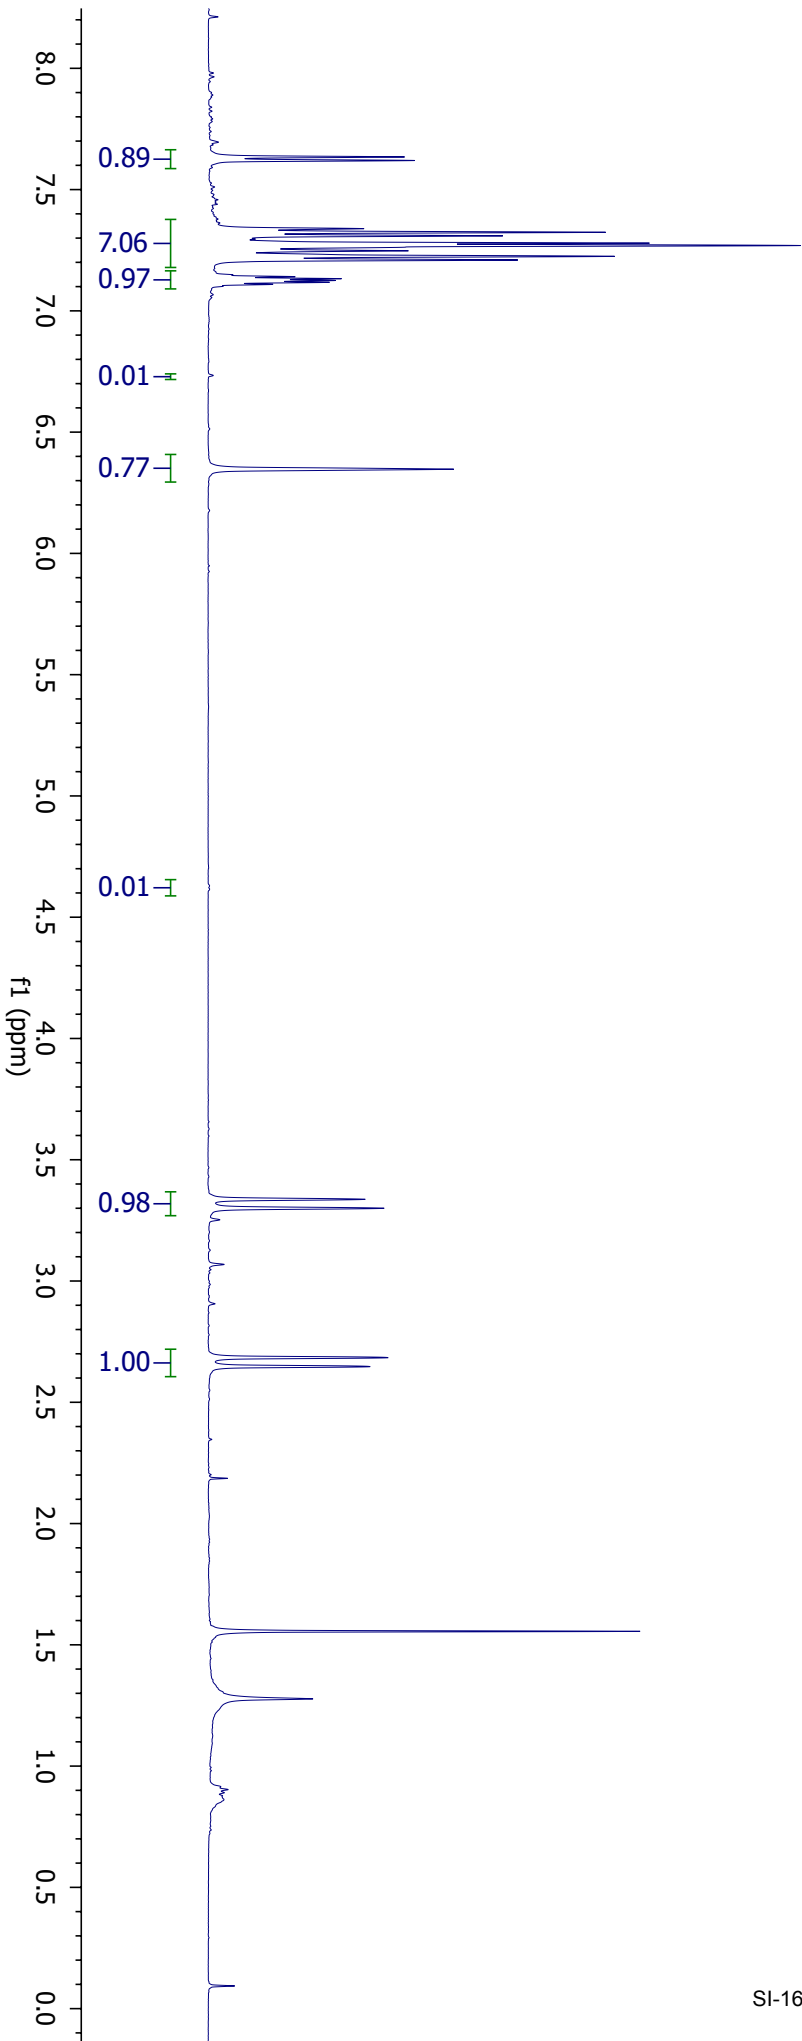

153.99  
151.01  
150.08  
143.84  
129.83  
128.71  
128.20  
127.34  
126.74  
123.28  
122.34  
120.33  
116.44

77.02

33.86

| Parameter                | Value                                                                    |
|--------------------------|--------------------------------------------------------------------------|
| 1 Data File Name         | C:/Users/zhang laptop/Desktop/NMR/Yanzhao Wang/wyz4-292-pro-c13.fid/ fid |
| 2 Title                  | wyz4-292-pro-c13                                                         |
| 3 Solvent                | CDCl3                                                                    |
| 4 Acquisition Date       | 2011-09-22T12:49:16                                                      |
| 5 Spectrometer Frequency | 125.70                                                                   |

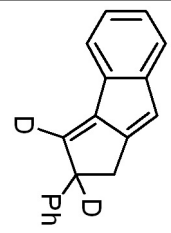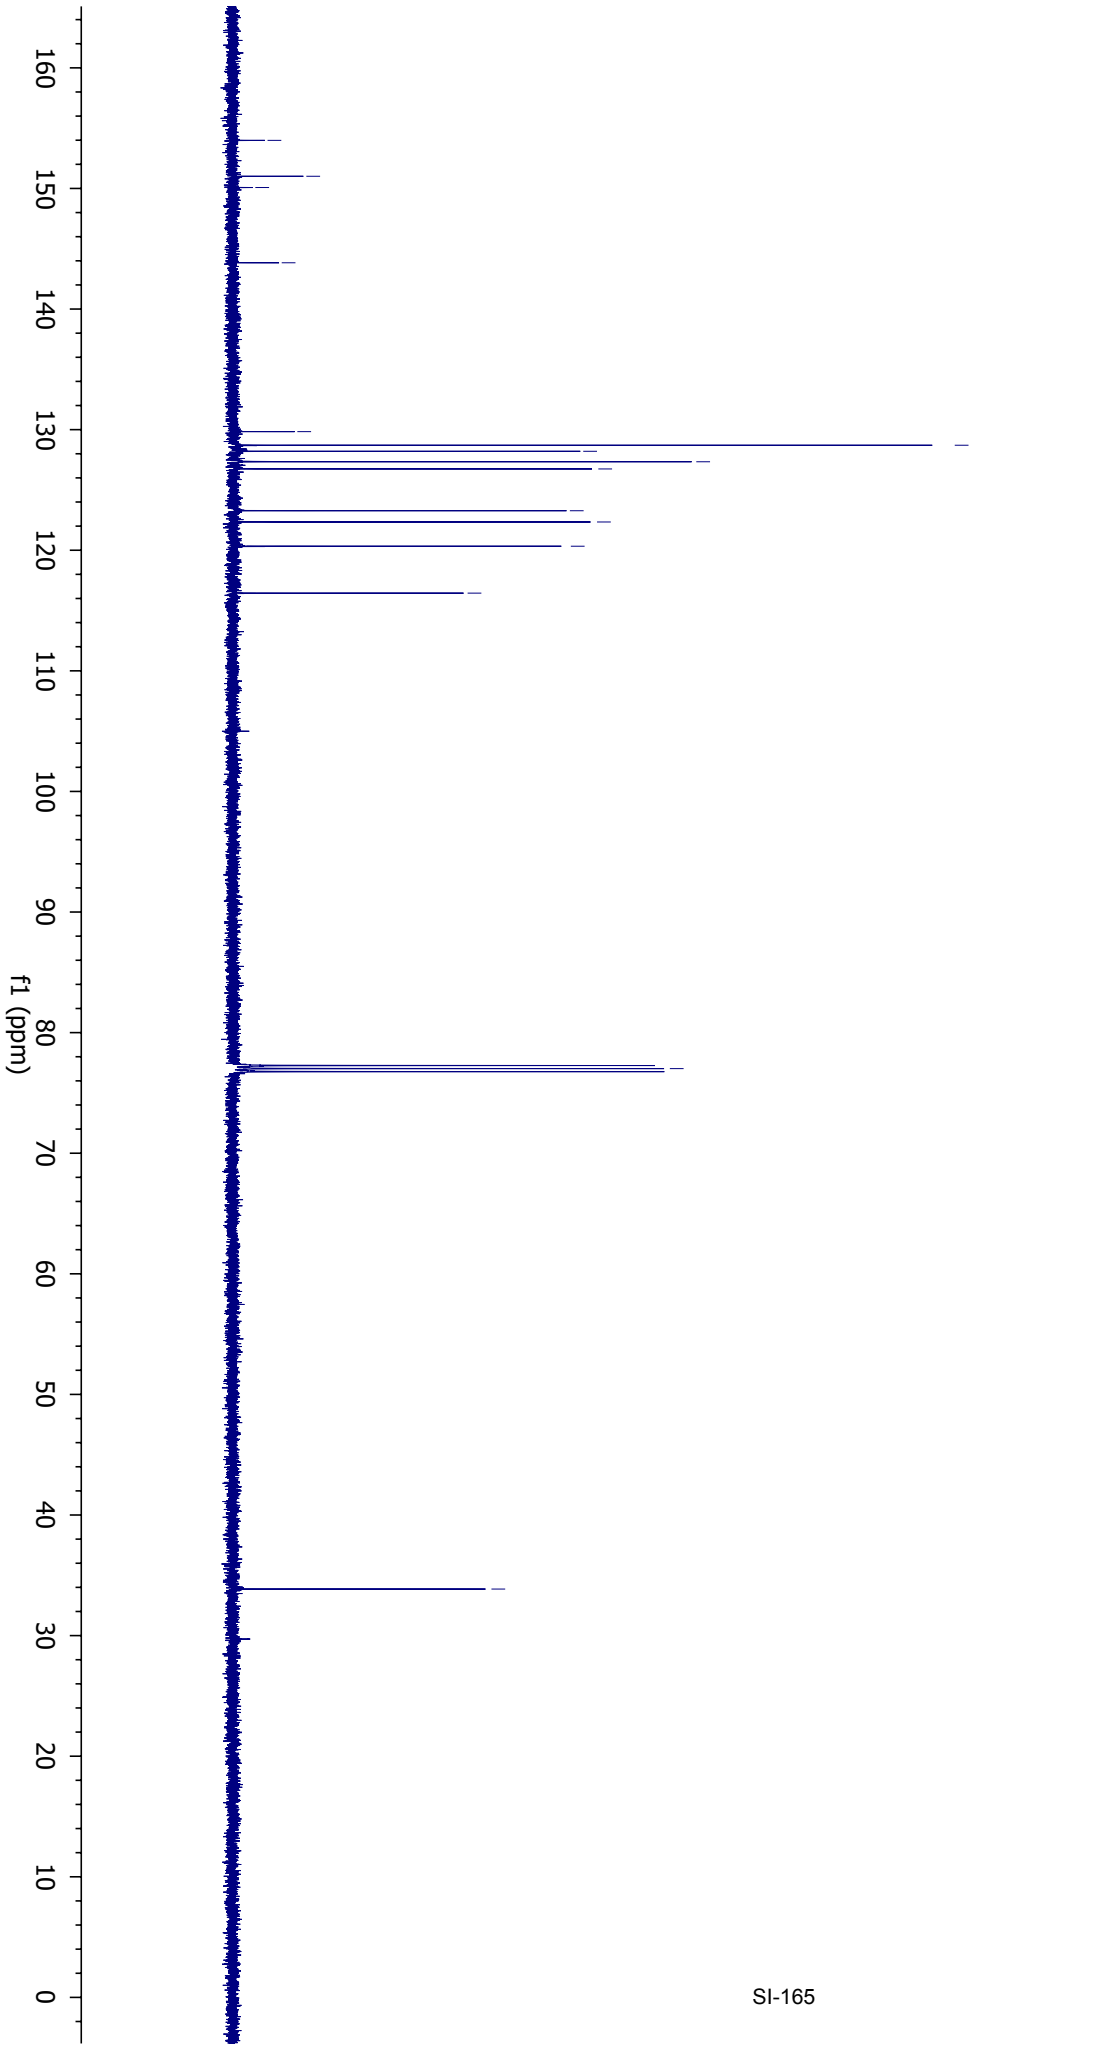

C:\Users\zhanglab1\Desktop\NMR\Kinus 20080731\DATA\jw-5-235-Aualkyne-h2.fid  
STANDARD PROTON PARAMETERS  
Jun 8 2011

USER:  
SOLVENT: cdcl3  
Experiment = s2pul  
Pulse length = 7.912 usec  
Relaxation delay = 4.800 sec  
NA = 32  
Solvent = cdcl3  
FID PTS:1d = 20006  
PTS:1d = 32768  
F1 = 499.856521 MHz  
F2 = 125.700813 MHz  
SW1 = 8002.40 Hz  
AT1 = 2.50 sec  
Hz per Pt 1stD = 0.24 Hz  
SW2 = 1.00 Hz  
Hz per Pt 2ndD = 1.00 Hz  
O1 = 2471.4680 Hz  
O2 = -0.5000 Hz  
LB1 = 0.00 Hz  
TP A = 43.13  
B = -1.41  
C = 0.00

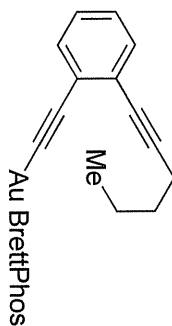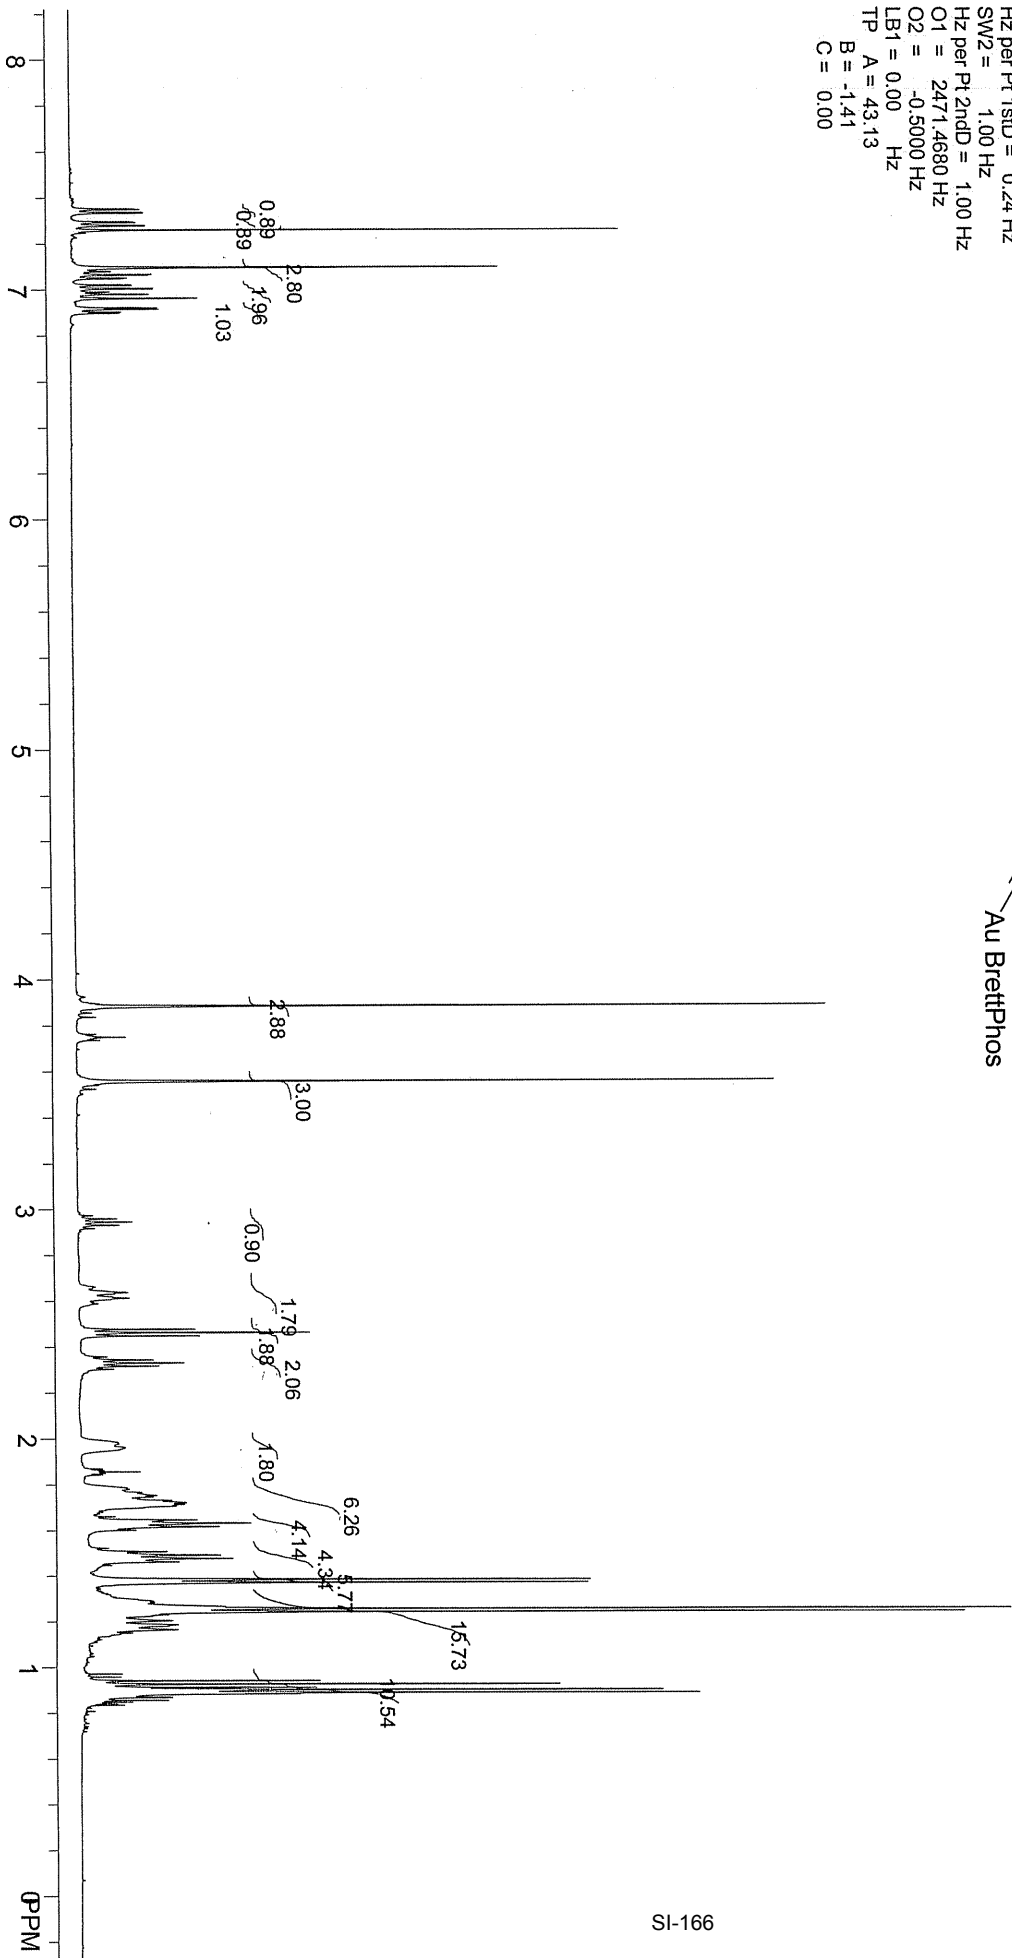

C:\Users\zhanglab1\Desktop\NMR\Ntus 20080731\DATA\syw-5-233-c13.fid  
STANDARD CARBON PARAMETERS  
Jun 24 2011

USER:  
SOLVENT: cdcl3  
Experiment = s2pul  
Pulse length = 6.000 usec  
Relaxation delay = 3.000 sec  
NA = 478  
Solvent = cdcl3  
FID PTSid = 36749  
PTSid = 65536  
F1 = 125.701683 MHz  
F2 = 499.858551 MHz  
SW1 = 28258.57 Hz  
AT1 = 1.30 sec  
Hz per Pt 1sid = 0.43 Hz  
SW2 = 1.00 Hz  
Hz per Pt 2ndD = 1.00 Hz  
O1 = 12769.5205 Hz  
O2 = -0.5000 Hz  
LB1 = 2.00 Hz  
TP A = -199.69  
B = 154.69  
C = 0.00

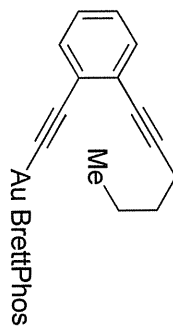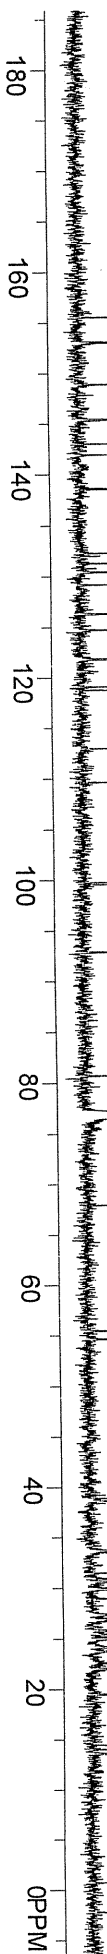

Jun 10 2011

USER:

SOLVENT: cdcl3

Experiment = s2pul

Pulse length = 11.663 usec

Relaxation delay = 4.800 sec

NA = 10

Solvent = cdcl3

FID PTS1d = 20006

PTS1d = 32768

F1 = 399.950684 MHz

F2 = 100.575279 MHz

SW1 = 8002.40 Hz

AT1 = 2.50 sec

Hz per Pt 1sid = 0.24 Hz

SW2 = 1.00 Hz

Hz per Pt 2ndd = 1.00 Hz

O1 = 2006.7504 Hz

O2 = -0.5000 Hz

LB1 = 0.00 Hz

TP A = -27.41

B = -64.86

C = 0.00

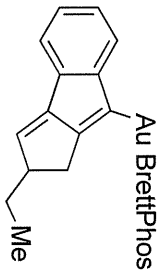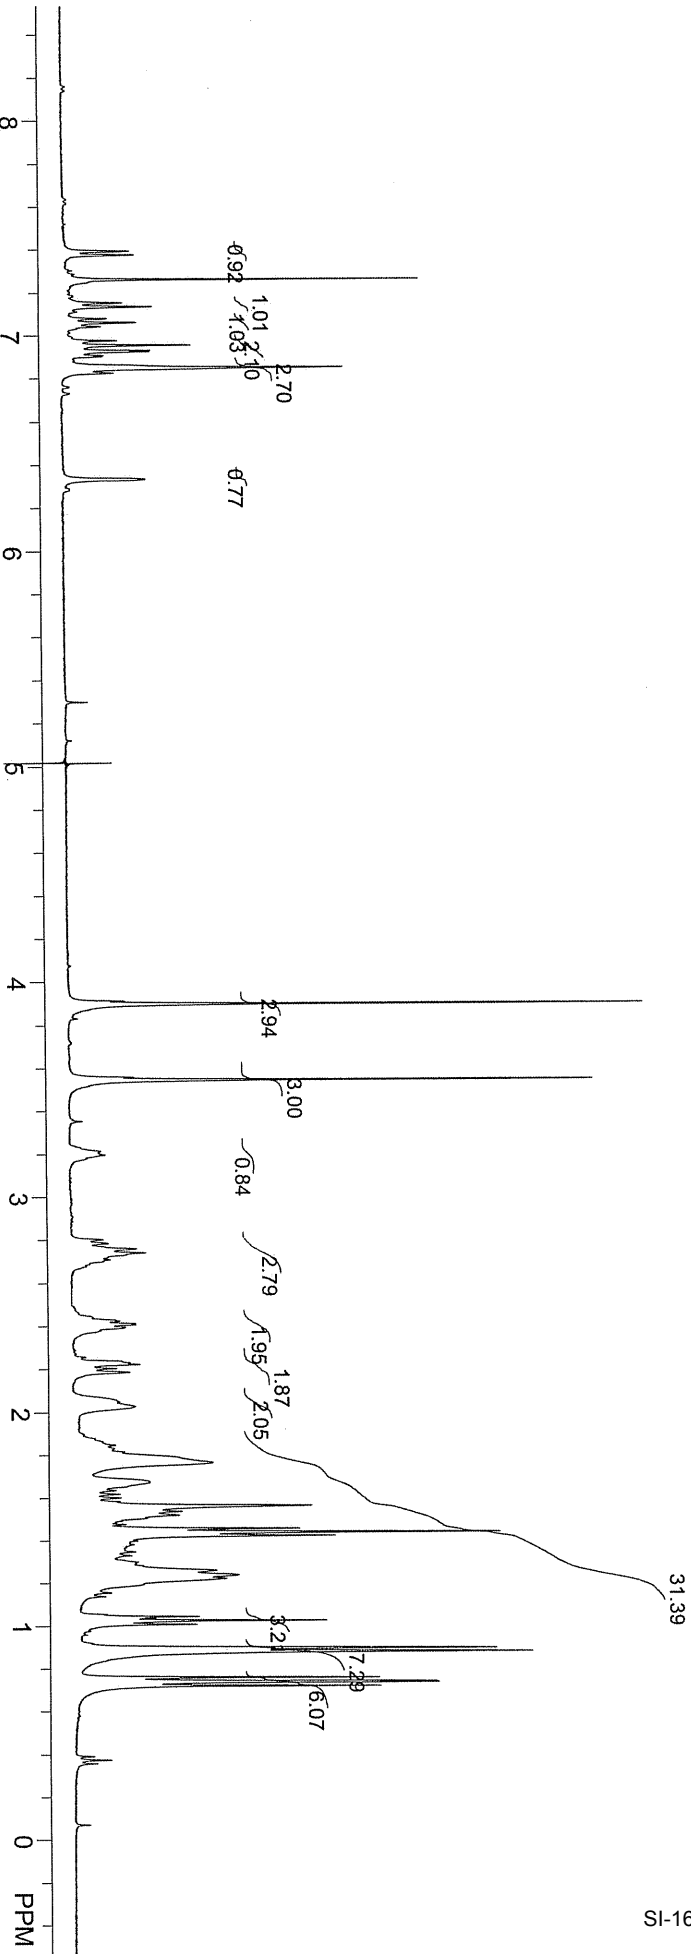



C:\Users\zhanglab1\Desktop\NMR\Ntus 20080731\DATA\5-yw-5-239-c3.fid  
Standard c13 run using qnp probe  
Jun 10 2011

USER:  
SOLVENT: cdcl3  
Experiment = s2pul  
Pulse length = 7.775 usec  
Relaxation delay = 1.300 sec  
NA = 19308  
Solvent = cdcl3  
FID PTS1d = 28040  
PTS1d = 32768  
F1 = 100.577232 MHz  
F2 = 399.960684 MHz  
SW1 = 28040.66 Hz  
AT1 = 1.00 sec  
Hz per Pt 1SID = 0.86 Hz  
SW2 = 1.00 Hz  
Hz per Pt 2ndd = 1.00 Hz  
O1 = 10057.2168 Hz  
O2 = -0.5000 Hz  
LB1 = 2.00 Hz  
TP A = 3.28  
B = -36.56  
C = 0.00

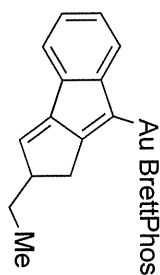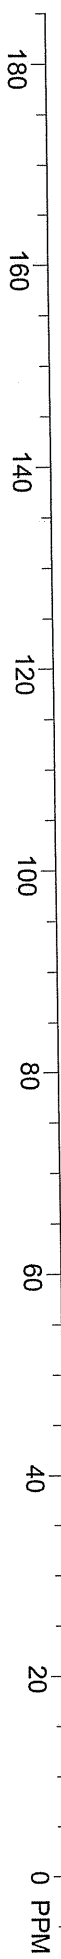

| Parameter                | Value                                                                   |
|--------------------------|-------------------------------------------------------------------------|
| 1 Data File Name         | C:/Users/zhang laptop/Desktop/NMR/Yanzhao Wang/wyz4-279-pro-h1.fid/ fid |
| 2 Title                  | wyz4-279-pro-h1                                                         |
| 3 Solvent                | CDCl3                                                                   |
| 4 Acquisition Date       | 2011-09-17T22:20:50                                                     |
| 5 Spectrometer Frequency | 499.86                                                                  |

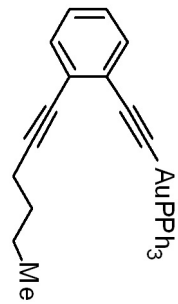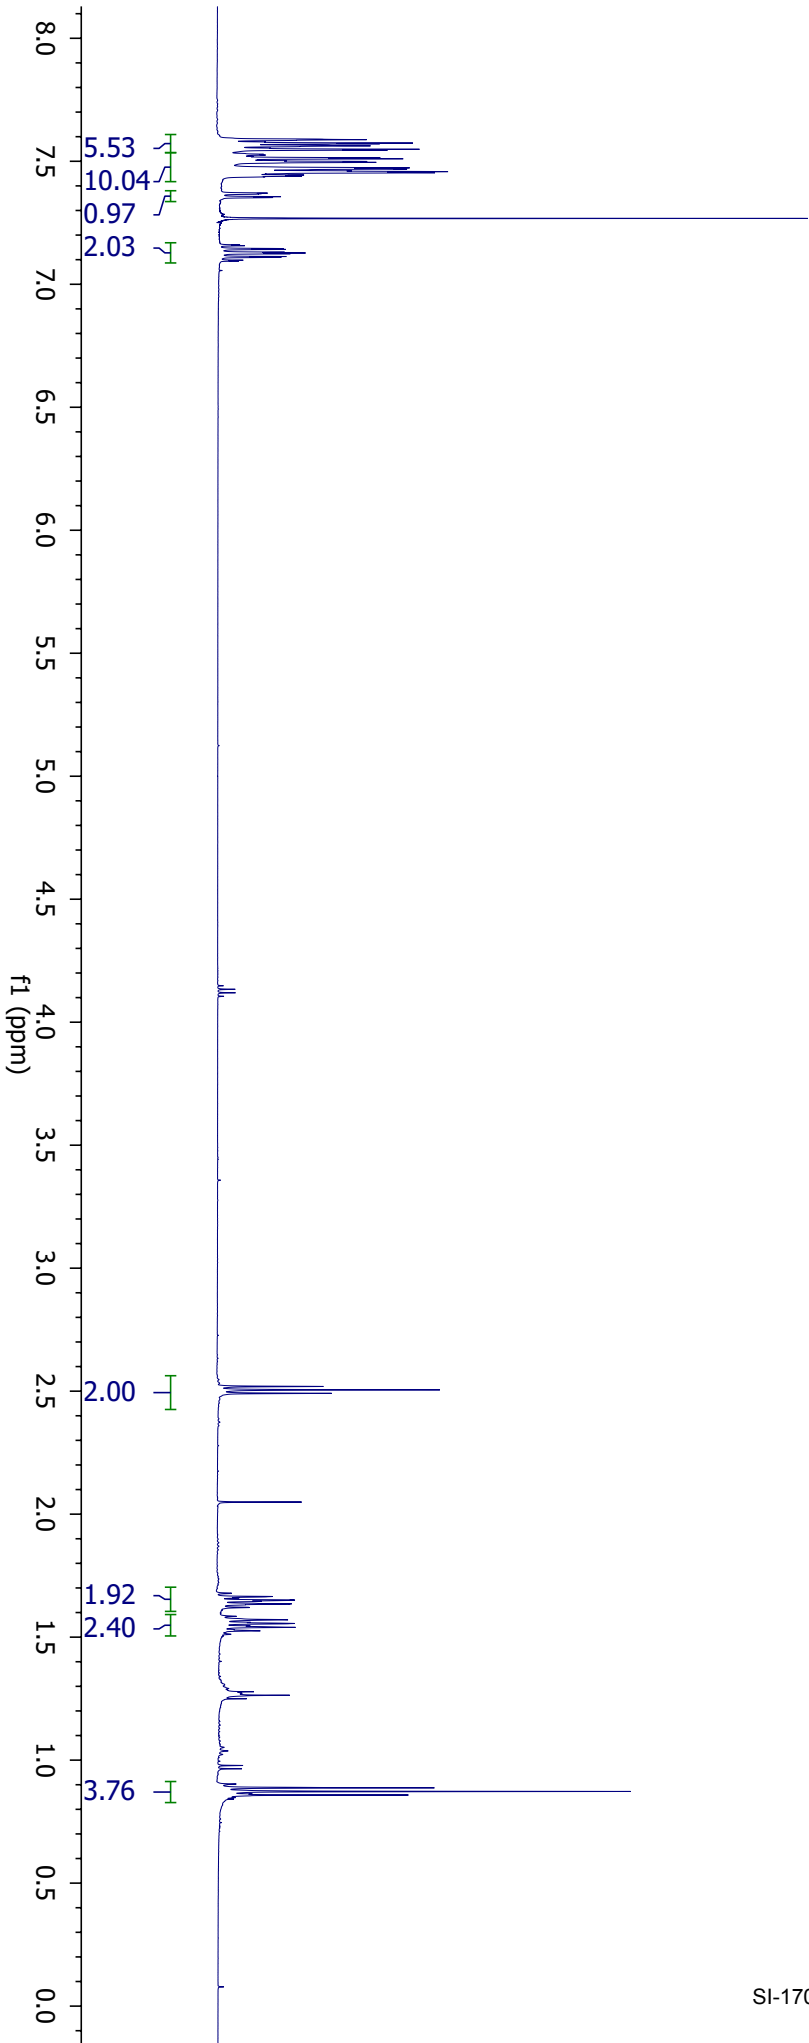

134.37  
134.26  
132.75  
131.64  
131.50  
131.49  
130.11  
129.67  
129.13  
129.04  
126.83  
126.75  
126.26

94.00

80.37  
77.26  
77.21  
77.01  
76.76

30.90

22.04  
19.58

13.79

| Parameter                | Value                                                                          |
|--------------------------|--------------------------------------------------------------------------------|
| 1 Data File Name         | C:/Users/zhang laptop/Desktop/NMR/ Yanzhao Wang/ wyz4-279-pro-c13-255.fid/ fid |
| 2 Title                  | wyz4-279-pro-c13-255                                                           |
| 3 Solvent                | CDCl3                                                                          |
| 4 Acquisition Date       | 2011-09-17T22:23:29                                                            |
| 5 Spectrometer Frequency | 125.70                                                                         |

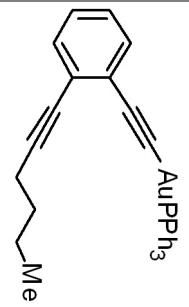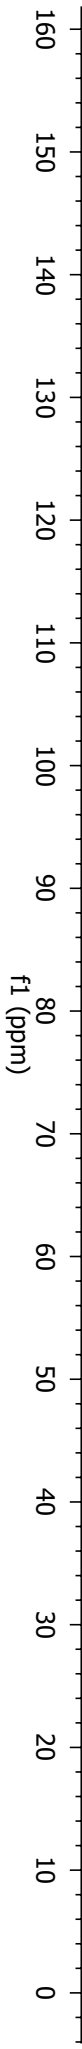

| Parameter                | Value                                                                         |
|--------------------------|-------------------------------------------------------------------------------|
| 1 Data File Name         | C:/Users/zhang laptop/Desktop/NMR/Yanzhao Wang/wyz4-279-pro-p31again.fid/ fid |
| 2 Title                  | wyz4-279-pro-p31again                                                         |
| 3 Solvent                | cdcl3                                                                         |
| 4 Acquisition Date       | 2011-09-18T15:32:34                                                           |
| 5 Spectrometer Frequency | 161.90                                                                        |

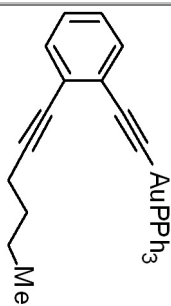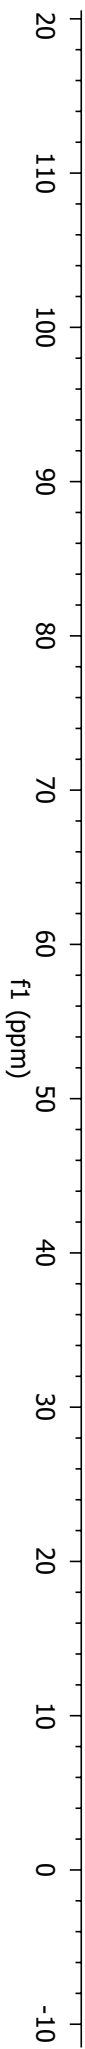

Supplement: NIHMS345452-supplement-1_si_001.pdf [file NIHMS345452-supplement-1_si_001.pdf]
